# Supplementary material for: Assessing Dynamic Changes of Taste-Related Primary Metabolism During Ripening of Durian Pulp Using Metabolomic and Transcriptomic Analyses
Source: Front Plant Sci. 2021 Jun 18;12:687799. doi: 10.3389/fpls.2021.687799 (PMC8250156; doi:10.3389/fpls.2021.687799)
Supplement: Supplementary file 1 [file Data_Sheet_1.xlsx]

## Sheet: Supplementary Table 1
Supplementary Table 1: Primers used in this study.
Name	Gene locus	Gene ID	Forward Primer (5' - 3')	Reverse Primer (5' - 3')	Product size
Aldehyde dehydrogenase	TRINITY_DN3932_c0_g2_i5	LOC111284558	GACGGAGTGCTCAATGTAGTA	CTGCTGCTGCTGTCATTATC	133
Arginine decarboxylase	TRINITY_DN2481_c0_g1_i7	LOC111308806	TCCACAACATGCCTTATCTC	GTCTCCACAGCAGCATTAT	109
Chorismate mutase	TRINITY_DN2698_c0_g1_i4	LOC111286253	GGATGTTCAGCTTGGTGATG	CAGTCAAGGCGATGTAGTAGA	138
gamma-aminobutyrate transaminase	TRINITY_DN22359_c0_g1_i1	LOC111305652	AGCATTTCTCCAAGGTTTCAAG	TCAGGAGGAAACGGATCATTAG	137
Glutamate decarboxylase	TRINITY_DN19853_c0_g1_i4	LOC111281776	CGTGTTGTCATCAGGGAAGA	AACCTCTTCGTCAGCCATAG	135
L-Isoleucine:2-oxoglutarate aminotransferase	TRINITY_DN22359_c0_g1_i4	LOC111305652	CGAGCAGAAGAAACAGTGAG	CTTTGTTAAGGCACCGGATA	130
Malate dehydrogenase	TRINITY_DN3943_c0_g3_i1	LOC111293205	AGATGCTAGCGTTGTTGAATG	CAAGCCAATCCTCTCAAACTC	145
NADP-dependent malic enzyme	TRINITY_DN1472_c0_g1_i2	LOC111286064	CTTGGAAGAGACCCGTAAGA	CCTGGACAGCACCTAATAGA	145
Ornithine δ-aminotransferase	TRINITY_DN1833_c0_g2_i9	LOC111278083	GTTCGTCCAGATGTTGTGATA	CATGTTCTCCAGGTCGAATG	112
Phosphofructokinase	TRINITY_DN6838_c0_g1_i1	LOC111285266	GTTGATTGTTGCTTGATCCC	CACCCTCTGCTATCACTATAAC	121
Tryptophan synthase	TRINITY_DN1822_c1_g1_i5	LOC111287933	TCAGCATGGAGTTGCTACA	CTCTAACCTCAGCACCAAGA	134

## Sheet: Supplementary Table 2
Supplementary Table 2 : Relative intensity of metabolites from CE-TOF/MS and GC-TOF/MS.
Metabolite from CE-TOF/MS	Unripe stage		Ripe stage
	Average	SD	Average	SD
1-aminocyclopropane-1-carboxylate (ACC)	0.000680321	0.000630173	0.0199428	0.00908116
1-methyladenosine	0.000856081	0.000199846	0.00083334	0.000760506
2,4-diaminobutanoate	0.000518733	0.00074257	0.00144179	0.000755821
2,6-diaminopimelate	0	0	0.0001074	0.0002148
2-aminoadipate	0.0209805	0.00332076	0.116908	0.128868
2-deoxyglucose-6-phosphate	0.00058	0.000120132	0.0014064	0.000257312
2-isopropylmalate	0.00752888	0.00328411	0.00313764	0.00167282
2-oxoadipate	0.000307473	0.000485569	0.000399494	0.000529179
3-aminopropanediol	0	0	0.000775494	0.00100673
3-hydroxypropionate	0	0	0.0773709	0.0619574
3-methylhistidine	0.00846383	0.00101505	0.0122259	0.00199871
3-ureidopropionate	0.00319212	0.00491768	0.0194697	0.0210374
4-methyl-2-oxovalerate	0.00358599	0.000919007	0.0224925	0.00513158
4-methyl-5-thiazoleethanol	0.00157449	0.000361165	0.00156167	0.000232138
4-oxovalerate	0.00455152	0.00128905	0.0390696	0.0180291
5-amino-4-oxovalerate	0.0006974	0.000218677	0.00430329	0.00338358
5-aminoimidazole-4-carboxamide ribonucleotide (AICAR)	0.0007574	0.000265463	0.00664056	0.00218987
5-methylcytosine	0.00233914	0.000284291	0.00393992	0.0010135
Abscisic acid	6.92e-05	0.0001384	0.000881009	0.000560218
Adenosine	0.0003044	0.000375358	0.00516333	0.00295775
Adenosine diphosphate (ADP)	0.00277027	0.00094206	0.00170757	0.000267936
Adenosine monophosphate (AMP)*	0.00475872	0.00186224	0.0678934	0.0206467
Adenosine triphosphate (ATP)	0	0	8.16e-05	0.0001632
Adipate	0	0	0.00512133	0.00116905
Alanine*	0.791968	0.490365	19.5007	3.67054
Allantoate	0	0	0.0001696	0.0003392
Allantoin	0.0001736	0.000249029	0.000296	0.000367785
Aminomethylpropanediol	0	0	0.00624384	0.00415318
Arginine	0.213388	0.0686465	0.245016	0.0635264
Arginosuccinate	8.62e-05	0.0001724	0.00214375	0.0012296
Asparagine*	10.8512	5.34283	18.6637	9.52852
Aspartate*	7.20886	1.54865	2.80317	2.06716
Betaine	0.0240161	0.00742386	0.0443266	0.0186175
Betaine-aldehyde	0	0	0.000331626	0.000663253
Biotin	0.0003636	0.000218539	0.000653145	0.000406457
cis-aconitate	0.0297276	0.0119265	0.0606289	0.0273032
Citramalate	0.00278497	0.000772763	0.00545957	0.00156752
Citrate*	3.53378	0.905831	2.92617	1.26298
Citrulline	0.00327366	0.00501186	0.000304004	0.000608008
Cyclic adenosine monophosphate (cAMP)	6.28e-05	0.0001256	0.0003598	0.000220259
Cyclohexane-1-carboxylate	0.0006388	0.000135792	0.0004608	7.15162e-05
Cysteine*	0.0058877	0.0030282	0.295991	0.0979627
Cytidine diphosphate (CDP)	0.000254	0.000118056	0	0
Cytidine monophosphate (CMP)	0.0007362	0.000115179	0.0018409	0.000594238
Cytosine	0.00475518	0.00109599	0.00912664	0.00219006
Deamino-NAD	0.000289	0.000260245	0.000896132	0.000601551
Deoxyadenosine monophosphate (dAMP)	0	0	0.0001	0.000130447
Deoxycytidine diphosphate (dCDP)	9.78e-05	0.000143344	9.4e-05	0.000188
Deoxyguanosine	0.00691739	0.00248622	0.00151087	0.00239772
Deoxyinosine	0	0	0.000423394	0.000846788
Deoxyribose-1-phosphate	0	0	0.0186699	0.0144098
Diethanolamine	0.0124153	0.00248384	0.0186691	0.00273121
Digalacturonate	0	0	0.000397566	0.000795133
Dihydroxyacetone phosphate	0.00232906	0.000673574	0.00526186	0.00108111
Flavin adenine dinucleotide (FAD)	0.0003844	8.41394e-05	0.0002786	0.000117133
Fumarate*	0.0160158	0.00940149	0.297922	0.0800739
G6P;F6P;M6P	0.096421	0.0456617	0.20269	0.0458752
GalN;GlcN	0.0001714	0.0003428	0.00102651	0.000954619
Gluconate*	0.029504	0.0131855	0.276057	0.206222
Glucosamine-6-phosphate	0.00065237	0.00103971	0.00279977	0.00252309
Glutamate*	7.54313	1.25023	8.34441	3.76199
Glutamine*	0.540009	0.251331	1.99891	0.68178
Glutathione disulfide (GSSG)	0.0168662	0.00262626	0.0191146	0.0125473
Glycerate	0.0114452	0.00240449	0.016854	0.00129324
Glycerol-3-phosphate*	0.00514814	0.000712689	0.0145541	0.00104832
Glycine*	0.0251945	0.0056625	0.221894	0.0721
Glycocyamine	0.000830804	0.000467053	0.00122002	0.000337845
Guanosine	0.00535162	0.00260074	0.00367807	0.000718489
Guanosine diphosphate (GDP)	0	0	4.1e-05	8.2e-05
Guanosine diphosphate glucose	4.68e-05	9.36e-05	5.58e-05	0.0001116
Guanosine monophosphate (GMP)	2.96e-05	5.92e-05	0.000501678	0.000516008
Heptanoate	0.00498429	0.00100848	0.00346572	0.000597115
Histidine	0.128107	0.0327715	0.658157	0.215147
Homoglutamine	0	0	0.000754792	0.000938465
HomoIle;HomoLeu	0	0	0.00317644	0.00635289
Homoserine	0.0143626	0.00443477	0.0806893	0.0410843
Homovanillate	0	0	4.02e-05	8.04e-05
Hydroxymethylglutarate	0.00124095	0.000257147	0.00221075	0.000543244
Hydroxyproline	0	0	0.00824328	0.00284385
Hypusine	0.00337252	0.00175026	0.00191718	0.00105822
Inosine monophosphate (IMP)	0.00264325	0.000354966	0.00567981	0.00118143
Isethionate	9.6e-05	0.000192	0	0
Isocitrate*	0.0685279	0.0190002	0.101065	0.058674
Isoleucine*	0.405744	0.121018	2.20763	0.962215
Isopropanolamine	0	0	0.00794997	0.00882173
Lactate*	0.0830893	0.00790697	0.0933145	0.0117867
Lactose-1-phosphate	0.00114832	0.000395982	0.00489024	0.00128559
L-alanyl-L-alanine	0	0	0.00231732	0.00190526
Leucine*	0.534872	0.195521	2.11721	0.761589
L-theanin	0.000378522	0.000757044	0.0186384	0.0120029
Lysine*	0.197312	0.0273638	0.500779	0.0842124
Malate*	1.07173	0.277261	7.33006	0.838063
Mannofuranuronatelactone	0.00248682	0.00497365	0.267307	0.126422
Melilotate	0.0001578	0.0003156	0.00222236	0.000862385
Methionine	0.0118704	0.00641454	0.0311793	0.012002
Methylneuraminate	0.0001836	0.000257999	0.0011859	0.000914994
Methylthioadenosine	0.0247048	0.00862253	0.0326616	0.0112782
Mevalonolactone	0.00108127	0.00216255	0.396168	0.332208
Mucic acid	0.0402665	0.00886065	0.0355844	0.00586918
N6-acetyllysine	0	0	0.0340991	0.01805
N8-acetylspermidine	0	0	0.0030581	0.0025107
N-acetylaspartate	0.0002604	0.000324534	0.000837878	0.000316043
N-acetyl-D-galactosamine-6-phosphate	0.0013008	0.000419439	0.00330784	0.000665726
N-acetylglutamate	0.0014301	0.00040105	0.00463242	0.00254487
N-acetylleucine	0	0	0.00267829	0.00228369
N-acetylmuramate	0	0	3.36e-05	6.72e-05
N-acetylneuraminate	0	0	0.0002418	0.0003512
N-acetylputrescine	0	0	0.003514	0.00354568
N-acetylserine	0.00384936	0.000248218	0.010165	0.00497172
N-acetyl-β-Alanine	0.00185441	0.000237106	0.00194751	0.000226718
N-benzyloxycarbonylGly	0.0013472	0.000363675	0.00409747	0.00232351
N-formylmethionine	0.000200241	0.000400482	0.0166958	0.00728644
N-glycolylneuraminate	0.0001394	0.000115746	0.0002718	0.000140189
Nicotinamide adenine dinucleotide (NAD)	0.00548838	0.001357	0.00738741	0.00084299
Nicotinamide adenine dinucleotide (NADH)	0.0003492	9.94091e-05	0.0003808	0.000205424
Nicotinamide adenine dinucleotide phosphate (NADP)	0.0002526	0.000221736	0	0
Nicotinate	0.00059301	0.000731494	0.00232781	0.00210989
Nicotinate-mononucleotide	0	0	0.0002792	0.000245249
Octopine	0.000590917	0.00118183	0	0
Ophthalmate	0.00742398	0.00415045	0.0884167	0.0376419
Ornithine	0.00259529	0.000929735	0	0
Oxamate	0.00558591	0.000193771	0.00632821	0.000863699
Pantothenate	0.00207042	0.000314112	0.00595232	0.000697198
Penicillamine	0	0	0.0116521	0.0178283
Phenylalanine*	0.218426	0.0596052	1.53843	0.784979
Phenylpropanoate	0	0	0.00384467	0.00357692
Pipecolate	3.20871	1.27111	6.07259	3.80048
Proline	0.235932	0.0366428	1.36088	0.464273
Putrescine*	0.0060377	0.00270053	0.0543877	0.0110504
Pyridoxamine	0	0	0.00686502	0.00269819
Pyridoxamine-5-phosphate	0.0139333	0.00163943	0.0080089	0.00129775
Pyruvate	0.00951903	0.00234942	0.0348629	0.0073286
Quinate	0.00263778	0.000931077	0.00535229	0.00292436
Raffinose*	0.00744832	0.00192381	0.0166171	0.00192274
R-lipoate	0	0	0.00270887	0.00066872
Saccharopine	0.00432415	0.00076698	0.0118715	0.0037233
S-adenosyl methionine (SAM)	0.00162436	0.00053911	0.0012175	0.000659573
S-adenosyl-l-homocysteine (SAH)	0.000798239	0.000412693	0.00162516	0.00065071
Sedoheptulose-7-phosphate	0.00253741	0.00104169	0.00500553	0.00181083
Serine*	0.22729	0.0767703	0.987527	0.265291
Shikimate	0.0003164	0.000388956	0.00171333	0.000448736
Spermidine	0.0836326	0.0511203	0.0501175	0.0162834
Spermine	0.0126782	0.00739012	0.00268604	0.00103317
Succinate*	0.0805074	0.0231369	0.448708	0.163907
Sucrose-6-phosphate	0.0010424	0.000543781	0.00377628	0.00106064
Tehalose-6-phosphate	0.00451128	0.00206748	0.0133339	0.00332436
Tetrahydropalmatine	0.00184913	0.00242724	0.0033139	0.00226573
Theophylline	0.0246961	0.00807683	0.0628689	0.0124628
Thiamine	0.0502697	0.0134999	0.0658603	0.0094766
Thiotomin	0	0	0.00162576	0.000459712
Threonine*	0.573427	0.0517946	0.807836	0.332419
Thymidine diphosphate glucose	0	0	0.00023965	0.0004793
trans-cinnamate	5.78e-05	0.0001156	0.000287265	0.000395648
Trigonelline	0.56593	0.152352	1.10173	0.22945
Tropine	0	0	0.0001138	0.0002276
Tryptophan*	0.0651139	0.00546201	0.513183	0.195835
Tyramine	0	0	0.00099878	0.00132207
Tyrosine*	0.0775447	0.0204735	0.709434	0.204039
Urate	0	0	0.00600189	0.00361091
Uridine diphosphate (UDP)	0.0002324	0.000122629	4.84e-05	9.68e-05
Uridine monophosphate (UMP)	0.00179859	0.000484788	0.0132354	0.00407434
Valine	0.44252	0.0851342	2.71774	1.13759
Xanthine	0	0	0.0002422	0.000297792
β-alanine*	0.0399937	0.00753869	0.490266	0.53156
β-nicotinamide mononucleotide	0.0270666	0.0357259	0.0478258	0.0276643
γ-aminobutyrate (GABA)*	0.161142	0.0669695	2.47571	1.02066
γ-guanidinobutyrate	0.00108521	0.00038606	0.00178634	0.000639371
Metabolite from GC-TOF/MS	Unripe stage		Ripe stage
	Average	SD	Average	SD
1-kestose	0.040811	0.015382	0.0437179	0.0134799
2-hydroxy-glutarate	0.0146533	0.0124558	0.0268434	0.00618331
α-ketoglutarate	0.00521876	0.00203401	0.00757876	0.00261462
5-methylthio-adenosine	0.021278	0.0081804	0.00829572	0.00599409
Adenosine monophosphate (AMP)*	0.00511601	0.00723512	0.0175971	0.0136172
Alanine*	0.248438	0.177587	4.53439	1.98722
Asparagine*	0.0742011	0.0404254	0.0250524	0.018627
Aspartate*	0.114	0.017004	0.0167221	0.0150028
Citrate*	0.11506	0.010037	0.109146	0.00671317
Cysteine*	0.00126522	0.00178929	0	0
Ethanolamine	0.00716172	0.00714718	0.016156	0.00587187
Fructose	0.291029	0.140471	0.956361	0.0452907
Fructose-6-phosphate	0.0252636	0.0134034	0.0398145	0.00590783
Fumarate*	0.0123519	0.00654162	0.0703368	0.021074
Galactarate	0.0221726	0.0102583	0.0126269	0.00373094
Galactinol	0.0675298	0.0303566	0.0147589	0.00612149
Galacturonate	0.00164771	0.000984894	0.00679791	0.00152277
Gluconate*	0.0255355	0.0243769	0.0163997	0.00784065
Glucose	0.100397	0.141982	1.3149	0.0692292
Glucose-6-phosphate	0.0340545	0.0148788	0.0463045	0.00679758
Glutamate*	0.0318614	0.0117596	0.0262078	0.0110142
Glutamine*	0.00526673	0.00744828	0.0142267	0.00938897
Glycerol	0.0053723	0.0012888	0.0139419	0.00636411
Glycerol-3-phosphate*	0.0103485	9.83031e-05	0.0139501	0.0036384
Glycine*	0.00371348	0.000944825	0.0157284	0.00512153
Hexadecanoate	0.0340257	0.0126011	0.0317093	0.00556222
Hydrogen sulfide	0.0421439	0.0072629	0.035805	0.00760068
Isocitrate*	0.0766289	0.0148558	0.0762704	0.0106853
Isoleucine*	0.00732794	0.00390059	0.0252256	0.0112622
Lactate*	0.0127201	0.00486401	0.024381	0.00665856
Leucine*	0.00517752	0.00428162	0.0131399	0.00793877
Lysine*	0.000272245	0.000385012	0	0
Malate*	0.069617	0.0181158	0.0948354	0.00558479
Maltose	0.00165217	0.000285081	0.0473203	0.0277637
myo-inositol	0.00349953	0.00119637	0.0177495	0.00621079
Octadecanoate	0.0446304	0.0135513	0.0389254	0.00518238
Phenylalanine*	0.00266519	0.000563259	0.01416	0.00718682
Phosphorate	0.0250143	0.00225727	0.0290031	0.00389874
Piperidine-2-carboxylate	0.0155591	0.0100137	0.0147305	0.00289585
Putrescine*	0.00143099	0.00150166	0.0276834	0.00225536
Pyroglutamate	0.0879777	0.00728399	0.0445824	0.0223306
Raffinose*	0.00500283	0.00281108	0.0167207	0.00296287
Ribonic acid-γ-lactone	0.0419359	0.0154497	0.0260515	0.00604651
Serine*	0.00478057	0.00182078	0.0122487	0.00361885
Succinate*	0.00120367	0.000916899	0.00814145	0.00440537
Sucrose	2.50485	1.13706	7.51885	0.571548
Tartarate	0.0624835	0.0448781	0.0354014	0.013811
Threitol	0.0202895	0.017476	0.0070953	0.00184842
Threonate	0.0533287	0.00251416	0.00904595	0.00299429
Threonic acid-1,4-lactone	0.0794591	0.0241548	0.0357022	0.0135956
Threonine*	0.0391075	0.00467209	0.0189625	0.0102537
Tryptophan*	0.00254	0.000605499	0.00925202	0.00537712
Tyrosine*	0.00324128	0.0016731	0.00851812	0.00393529
β-alanine*	0.031479	0.0128903	0.0121296	0.00939793
γ-aminobutyrate (GABA)*	0.0121427	0.00238137	0.0390989	0.00899088
γ-glutamylvaline	0.00415937	0.00256921	0.00669158	0.00485229
* = metabolites that were annotated from both methods

## Sheet: Supplementary Table 3
Supplementary Table 3 : Metabolic pathway impact and related pathway.
CE-TOF/MS
	Match Status	Raw p	-log(p)	Holm adjust	FDR	Impact
Arginine and proline metabolism*	11/34	2.8186e-09	8.55	1.663e-07	1.663e-07	0.5247
Aminoacyl-tRNA biosynthesis*	21/46	5.3557e-08	7.2712	3.1063e-06	1.5799e-06	0.22222
Cyanoamino acid metabolism	6/29	3.3609e-07	6.4735	1.9157e-05	5.7874e-06	0
Glutathione metabolism*	7/26	4.1057e-07	6.3866	2.2992e-05	5.7874e-06	0.17183
Glycine, serine and threonine metabolism*	10/33	4.9046e-07	6.3094	2.6975e-05	5.7874e-06	0.60308
Cysteine and methionine metabolism*	11/46	7.2006e-07	6.1426	3.8883e-05	6.9035e-06	0.39483
Glyoxylate and dicarboxylate metabolism*	10/29	8.1906e-07	6.0867	4.341e-05	6.9035e-06	0.41271
Thiamine metabolism	7/22	9.4571e-07	6.0242	4.9177e-05	6.9746e-06	0
Vitamin B6 metabolism*	3/11	1.3325e-06	5.8753	6.7956e-05	8.5008e-06	0.10256
Tyrosine metabolism*	4/16	1.4408e-06	5.8414	7.2041e-05	8.5008e-06	0.27703
Sulfur metabolism	3/15	1.727e-06	5.7627	8.4623e-05	9.263e-06	0.09392
Indole alkaloid biosynthesis	1/4	1.9962e-06	5.6998	9.5817e-05	9.8145e-06	0
Pyruvate metabolism*	5/22	2.1805e-06	5.6614	0.00010248	9.8962e-06	0.32193
Valine, leucine and isoleucine biosynthesis*	7/22	2.5599e-06	5.5918	0.00011775	1.0788e-05	0.16448
Carbon fixation in photosynthetic organisms*	7/21	3.0173e-06	5.5204	0.00013578	1.1868e-05	0.26269
Citrate cycle (TCA cycle)*	7/20	3.3537e-06	5.4745	0.00014756	1.2367e-05	0.31085
Alanine, aspartate and glutamate metabolism*	11/22	4.9943e-06	5.3015	0.00021475	1.569e-05	0.79497
Zeatin biosynthesis	4/21	5.0243e-06	5.2989	0.00021475	1.569e-05	0.0271
Phenylalanine, tyrosine and tryptophan biosynthesis*	4/22	5.0528e-06	5.2965	0.00021475	1.569e-05	0.1016
Terpenoid backbone biosynthesis	2/30	5.8393e-06	5.2336	0.00023357	1.7226e-05	0
Butanoate metabolism*	4/17	6.1719e-06	5.2096	0.0002407	1.734e-05	0.13636
Selenocompound metabolism	1/13	1.0928e-05	4.9615	0.00041527	2.8641e-05	0
Arginine biosynthesis*	9/18	1.1165e-05	4.9521	0.00041527	2.8641e-05	0.55729
Glycolysis / Gluconeogenesis*	4/26	1.4006e-05	4.8537	0.00050422	3.4432e-05	0.22331
Valine, leucine and isoleucine degradation	4/37	2.1587e-05	4.6658	0.00075553	5.0907e-05	0.00991
Glucosinolate biosynthesis	7/65	2.2434e-05	4.6491	0.00076274	5.0907e-05	0
Fructose and mannose metabolism*	2/20	3.0919e-05	4.5098	0.0010203	6.5151e-05	0.11547
Inositol phosphate metabolism	2/28	3.0919e-05	4.5098	0.0010203	6.5151e-05	0
C5-Branched dibasic acid metabolism	1/6	3.3991e-05	4.4686	0.0010537	6.9155e-05	0
Histidine metabolism	1/15	3.9431e-05	4.4042	0.0011829	7.7548e-05	0.04264
Lysine biosynthesis*	4/9	4.194e-05	4.3774	0.0012163	7.9821e-05	0.16216
Pantothenate and CoA biosynthesis*	6/23	4.7384e-05	4.3244	0.0013268	8.7365e-05	0.27214
Isoquinoline alkaloid biosynthesis*	2/6	7.9958e-05	4.0971	0.0021589	0.00014296	0.5
Tropane, piperidine and pyridine alkaloid biosynthesis	2/8	0.00010968	3.9599	0.0028516	0.00019032	0
Sphingolipid metabolism	1/17	0.00012602	3.8996	0.0031504	0.00021243	0
Purine metabolism	15/63	0.00015008	3.8237	0.003602	0.00024597	0.34551
Ubiquinone and other terpenoid-quinone biosynthesis*	2/38	0.00015482	3.8102	0.003602	0.00024687	0
Propanoate metabolism*	2/20	0.0001625	3.7891	0.003602	0.0002523	0.10591
Pyrimidine metabolism*	8/38	0.00027859	3.555	0.0058503	0.00042145	0.33481
Galactose metabolism	1/27	0.0005187	3.2851	0.010374	0.00076509	0.07998
Monobactam biosynthesis	2/8	0.00068003	3.1675	0.012921	0.00097858	0
Nitrogen metabolism	2/12	0.0011788	2.9286	0.021219	0.001656	0
Starch and sucrose metabolism	2/22	0.0012668	2.8973	0.021535	0.0017381	0.02208
Glycerophospholipid metabolism	1/37	0.0016964	2.7705	0.027143	0.0022748	0
Glycerolipid metabolism	2/21	0.0018125	2.7417	0.027188	0.0023765	0.00426
Pentose phosphate pathway*	3/19	0.0021176	2.6742	0.029647	0.0027161	0.19067
beta-Alanine metabolism*	7/18	0.0025212	2.5984	0.032775	0.0031649	0.52778
Phenylalanine metabolism*	2/11	0.0059425	2.226	0.07131	0.0071552	0.47059
Phenylpropanoid biosynthesis	2/46	0.0059425	2.226	0.07131	0.0071552	0.01268
Nicotinate and nicotinamide metabolism*	7/13	0.017497	1.757	0.17497	0.020647	0.52323
Tryptophan metabolism*	2/28	0.017867	1.748	0.17497	0.020669	0.12037
Carotenoid biosynthesis	1/43	0.021621	1.6651	0.17497	0.024531	0.00632
Amino sugar and nucleotide sugar metabolism	2/50	0.042172	1.375	0.29521	0.046946	0.00265
Lysine degradation	4/18	0.095564	1.0197	0.57338	0.10441	0
Riboflavin metabolism	1/11	0.14996	0.82401	0.74982	0.16087	0
Porphyrin and chlorophyll metabolism	2/48	0.16449	0.78386	0.74982	0.1733	0.02261
Pentose and glucuronate interconversions	1/16	0.34659	0.46018	1	0.35875	0
Biosynthesis of secondary metabolites - unclassified	1/5	0.373	0.42829	1	0.37943	0
Biotin metabolism	1/18	0.52727	0.27797	1	0.52727	0.07692
GC-TOF/MS
	Match Status	Raw p	-log(p)	Holm adjust	FDR	Impact
Aminoacyl-tRNA biosynthesis*	15/46	0.0011804	2.928	0.062559	0.062559	0.11111
Starch and sucrose metabolism*	4/22	0.0032533	2.4877	0.16917	0.069077	0.33073
Glycine, serine and threonine metabolism*	5/33	0.0054702	2.262	0.27898	0.069077	0.51346
Alanine, aspartate and glutamate metabolism*	7/22	0.0057446	2.2407	0.28723	0.069077	0.64748
Glycolysis / Gluconeogenesis	2/26	0.007449	2.1279	0.365	0.069077	0.00038
Cyanoamino acid metabolism	6/29	0.0078555	2.1048	0.37706	0.069077	0
Galactose metabolism*	4/27	0.01059	1.9751	0.49773	0.069077	0.27225
Selenocompound metabolism	1/13	0.012337	1.9088	0.5675	0.069077	0
Carbon fixation in photosynthetic organisms	3/21	0.014125	1.85	0.63563	0.069077	0.00622
Glutathione metabolism*	5/26	0.015539	1.8086	0.68371	0.069077	0.14117
Pyruvate metabolism	2/22	0.016281	1.7883	0.70009	0.069077	0
Cysteine and methionine metabolism	4/46	0.016652	1.7785	0.70009	0.069077	0.04897
Arginine and proline metabolism*	2/34	0.016943	1.771	0.70009	0.069077	0.15277
Arginine biosynthesis	4/18	0.02078	1.6823	0.83122	0.078669	0.08544
Tyrosine metabolism*	2/16	0.026746	1.5727	1	0.082899	0.21622
Monobactam biosynthesis	1/8	0.029553	1.5294	1	0.082899	0
beta-Alanine metabolism	1/18	0.029553	1.5294	1	0.082899	0
Nicotinate and nicotinamide metabolism	1/13	0.029553	1.5294	1	0.082899	0
Lysine biosynthesis	2/9	0.030568	1.5147	1	0.082899	0
Thiamine metabolism	2/22	0.034442	1.4629	1	0.082899	0
Phenylalanine metabolism*	1/11	0.035975	1.444	1	0.082899	0.47059
Phenylpropanoid biosynthesis	1/46	0.035975	1.444	1	0.082899	0
Tropane, piperidine and pyridine alkaloid biosynthesis	1/8	0.035975	1.444	1	0.082899	0
Glycerolipid metabolism	2/21	0.058917	1.2298	1	0.13011	0.01809
Citrate cycle (TCA cycle)	4/20	0.06487	1.188	1	0.13569	0.23039
Glyoxylate and dicarboxylate metabolism	7/29	0.068843	1.1621	1	0.13569	0.2835
Sphingolipid metabolism	1/17	0.069126	1.1604	1	0.13569	0
Amino sugar and nucleotide sugar metabolism	2/50	0.089639	1.0475	1	0.16819	0
Phenylalanine, tyrosine and tryptophan biosynthesis	3/22	0.09203	1.0361	1	0.16819	0.02152
Glucosinolate biosynthesis	4/65	0.095229	1.0212	1	0.16824	0
Sulfur metabolism	4/15	0.099577	1.0018	1	0.17024	0.46961
Propanoate metabolism	1/20	0.11025	0.95763	1	0.18008	0
Butanoate metabolism	2/17	0.11212	0.95031	1	0.18008	0
Valine, leucine and isoleucine biosynthesis	3/22	0.11986	0.92131	1	0.18685	0
Isoquinoline alkaloid biosynthesis	1/6	0.14757	0.83099	1	0.21726	0.5
Ubiquinone and other terpenoid-quinone biosynthesis	1/38	0.14757	0.83099	1	0.21726	0
Valine, leucine and isoleucine degradation	2/37	0.15389	0.81279	1	0.22043	0
Glycerophospholipid metabolism	2/37	0.17161	0.76545	1	0.23936	0.09832
Purine metabolism	1/63	0.2216	0.65444	1	0.29362	0
Pyrimidine metabolism	1/38	0.2216	0.65444	1	0.29362	0
Nitrogen metabolism	2/12	0.23926	0.62112	1	0.29599	0
Tryptophan metabolism	1/28	0.24014	0.61953	1	0.29599	0.12037
Indole alkaloid biosynthesis	1/4	0.24014	0.61953	1	0.29599	0
Inositol phosphate metabolism	1/28	0.35749	0.44673	1	0.43062	0
Pantothenate and CoA biosynthesis	1/23	0.3739	0.42724	1	0.44037	0
Lysine degradation	2/18	0.49294	0.3072	1	0.56796	0
Porphyrin and chlorophyll metabolism	1/48	0.63705	0.19583	1	0.71838	0
Pentose phosphate pathway	1/19	0.89577	0.047805	1	0.95693	0
Fatty acid biosynthesis	2/56	0.90277	0.044424	1	0.95693	0.01123
Biosynthesis of unsaturated fatty acids	2/22	0.90277	0.044424	1	0.95693	0
Fatty acid elongation	1/23	0.95902	0.018173	1	0.95902	0
Fatty acid degradation	1/37	0.95902	0.018173	1	0.95902	0
Cutin, suberine and wax biosynthesis	1/18	0.95902	0.018173	1	0.95902	0
*Purturbed pathway

## Sheet: Supplementary Table 4
Supplementary Table 4 : Significantly changed metabolites filtering by volcano plot.
Significantly changed metabolite	Log2 [Fold change (Ripe/Unripe)]	P-value
1-aminocyclopropane-1-carboxylate (ACC)	4.82375	0.00064855
2,4-diaminobutanoate	1.37851	0.0394
2-aminoadipate	2.47768	0.015303
2-deoxyglucose-6-phosphate	4.37156	6.29e-05
2-isopropylmalate	-1.25154	0.049458
3-hydroxypropionate	10.3326	3.88e-07
4-methyl-2-oxovalerate	2.64847	3.17e-06
4-oxovalerate	3.10098	9.67e-05
5-aminoimidazole-4-carboxamide ribonucleotide (AICAR)	3.13258	3.83e-05
Abscisic acid	2.92979	0.022746
Adenosine	3.92315	0.0015361
Adenosine monophosphate (AMP)	3.83491	7.3e-06
Adipate	6.41549	2.22e-10
Alanine	4.62176	1.09e-05
Aminomethylpropanediol	6.70404	0.0046484
Arginosuccinate	4.0054	0.01606
Aspartate	-1.35845	0.014116
cis-Aconitate	1.02857	0.043151
Cysteine	5.65163	2.25e-06
Cytidine diphosphate (CDP)	-2.05889	0.00060412
Cytidine monophosphate (CMP)	1.32193	0.0039166
Deoxyguanosine	-2.18442	0.013844
Deoxyribose-1-phosphate	8.28156	7.87e-06
Dihydroxyacetone phosphate	1.17632	0.0016964
Fructose	1.71809	0.044616
Fumarate	4.21723	1.26e-05
G6P;F6P;M6P	1.07039	0.015199
Galactinol	-2.18442	0.023494
Galacturonate	2.04614	0.030497
Gluconate	3.22651	0.0061519
Glucose	3.2257	0.099869
Glucosamine-6-phosphate	2.02503	0.038651
Glutamine	1.88753	0.001023
Glyceraldehyde-3-phosphate	1.5008	9.77e-07
Glycine	3.13914	3.03e-06
Guanosine monophosphate (GMP)	2.72683	0.034385
Histidine	2.36177	3.94e-05
Homoserine	2.49057	0.00046262
Hydroxyproline	7.10213	3.77e-09
Inosine monophosphate (IMP)	1.10434	0.00043707
Isoleucine	2.44361	0.00014181
Lactose-1-phosphate	2.08746	0.00014479
L-alanyl-L-alanine	5.28614	0.040029
Leucine	1.9855	0.00082173
L-theanin	5.44956	0.00033833
Lysine	1.34483	3.03e-05
Malate	2.774	2.09e-06
Maltose	4.83996	0.0023458
Mannofuranuronatelactone	6.72042	0.00016815
Melilotate	3.43296	0.00049632
Methionine	1.39506	0.016652
Methylneuraminate	2.43296	0.012546
Mevalonolactone	8.45459	0.00015451
myo-Inositol	2.34199	0.01424
N6-acetyllysine	9.15056	1.27e-08
N8-acetylspermidine	5.68285	0.040012
N-acetylaspartate	1.5008	0.028959
N-acetyl-D-galactosamine-6-phosphate	1.34483	0.0013181
N-acetylglutamate	1.69599	0.0037757
N-acetylleucine	5.48671	0.008029
N-acetylserine	1.40054	0.012209
N-benzyloxycarbonylglycine	1.60407	0.018841
N-formylmethionine	6.07168	3.58e-05
Nicotinamide adenine dinucleotide phosphate (NADP)	-2.18442	0.04415
Nicotinate mononucleotide	2.33628	0.043339
Ophthalmate	3.5741	0.0002016
Ornithine	-5.64386	9.6e-09
Pantothenate	1.52105	5.15e-06
Phenylalanine	2.81558	0.0001134
Phenylpropanoate	6.01078	0.041385
Proline	2.52857	1.29e-05
Putrescine	3.16993	5.23e-05
Pyridoxamine	6.8382	4.06e-08
Pyruvate	1.87184	3.4e-05
Raffinose	1.15704	0.0005187
R-lipoate	5.49665	2.33e-09
Saccharopine	1.45943	0.00030268
Serine	2.1177	0.00012602
Shikimate	2.28096	0.0076437
Spermine	-2.25154	0.035995
Succinate	2.47768	0.00011126
Sucrose	1.5858	0.026972
Sucrose-6-phosphate	1.85599	0.00080297
Trehalose-6-phosphate	1.5656	0.0035022
Theophylline	1.3505	0.0015375
Thiotomin	4.76022	2.42e-08
Threonate	-2.5596	0.0013015
Tryptophan	2.9782	2e-06
Tyrosine	3.19377	6.29e-06
Urate	6.64717	0.0042257
Uridine monophosphate (UMP)	2.87971	9.04e-06
Valine	2.61824	2.21e-05
β-Alanine	3.61589	0.0016518
γ-aminobutyrate (GABA)	3.94111	2.25e-05

## Sheet: Supplementary Table 5
Supplementary Table 5 : Overview of transcriptome analysis.
Total clean reads
Mature_1	16623628
Mature_2	16716953
Mature_3	11681804
Ripe_1	12804113
Ripe_2	10382192
Ripe_3	14188624
The statistics of length and number for the de novo assembly
Transcripts from De novo assembly	Min Length	Max Length	Avg Length
164618	190	21487	1082.67
Summary statistics from alignment
Input Reads		Aligned Reads		Total
Name	Total Records	Aligned 1 Time	Aligned Multiple Times	Overall Alignment Rate	Not Aligned
Mature_1	36214703	4,043,201 / 11.165%	12,580,121 / 34.738%	16,623,322 / 45.9%	19,591,381 / 54.098%
Mature_2	35996271	3,858,353 / 10.719%	12,858,416 / 35.722%	16,716,769 / 46.44%	19,279,502 / 53.56%
Mature_3	25323988	2,801,399 / 11.062%	8,880,119 / 35.066%	11,681,518 / 46.13%	13,642,470 / 53.872%
Ripe_1	27827045	2,963,940 / 10.651%	9,839,968 / 35.361%	12,803,908 / 46.01%	15,023,137 / 53.988%
Ripe_2	22597934	2,407,080 / 10.652%	7,974,795 / 35.29%	10,381,875 / 45.94%	12,216,059 / 54.058%
Ripe_3	30419270	3,273,785 / 10.762%	10,914,632 / 35.881%	14,188,417 / 46.64%	16,230,853 / 53.357%
ORF Type	Sequences
Complete	55832
5' Partial	12655
3' Partial	8019
Internal	8658

## Sheet: Supplementary Table 6
Supplementary Table 6 : Annotation of the transcripts.
SeqName	Description	e-Value	#GO	GO IDs	GO Names	Enzyme Codes	Enzyme Names	InterPro IDs	InterPro GO IDs	InterPro GO Names
TRINITY_DN0_c0_g1_i1	ubiquitin-60S ribosomal protein L40	3.22285e-29	13	P:GO:0006412; P:GO:0006511; P:GO:0016567; F:GO:0003729; F:GO:0003735; F:GO:0031386; F:GO:0031625; F:GO:0046872; C:GO:0005730; C:GO:0005794; C:GO:0009506; C:GO:0022625; C:GO:0022627	P:translation; P:ubiquitin-dependent protein catabolic process; P:protein ubiquitination; F:mRNA binding; F:structural constituent of ribosome; F:protein tag; F:ubiquitin protein ligase binding; F:metal ion binding; C:nucleolus; C:Golgi apparatus; C:plasmodesma; C:cytosolic large ribosomal subunit; C:cytosolic small ribosomal subunit			IPR019956 (PRINTS); IPR000626 (PFAM); G3DSA:3.10.20.90 (GENE3D); PTHR10666 (PANTHER); PTHR10666:SF327 (PANTHER); IPR000626 (PROSITE_PROFILES); cd01803 (CDD); IPR029071 (SUPERFAMILY)	F:GO:0005515	F:protein binding
TRINITY_DN0_c0_g1_i3	ubiquitin 11	2.63459e-88	8	P:GO:0006412; P:GO:0006511; P:GO:0016567; F:GO:0003735; F:GO:0031386; F:GO:0031625; C:GO:0005730; C:GO:0022625	P:translation; P:ubiquitin-dependent protein catabolic process; P:protein ubiquitination; F:structural constituent of ribosome; F:protein tag; F:ubiquitin protein ligase binding; C:nucleolus; C:cytosolic large ribosomal subunit			IPR019956 (PRINTS); IPR000626 (PFAM); G3DSA:3.10.20.90 (GENE3D); IPR038587 (G3DSA:2.20.28.GENE3D); IPR001975 (PFAM); PTHR10666:SF303 (PANTHER); PTHR10666 (PANTHER); IPR000626 (PROSITE_PROFILES); cd01803 (CDD); IPR029071 (SUPERFAMILY); IPR011332 (SUPERFAMILY)	P:GO:0006412; F:GO:0003735; F:GO:0005515; C:GO:0005840	P:translation; F:structural constituent of ribosome; F:protein binding; C:ribosome
TRINITY_DN0_c0_g2_i1	polyubiquitin 10	2.4263e-143	7	P:GO:0006511; P:GO:0010224; P:GO:0016567; F:GO:0031386; F:GO:0031625; C:GO:0005634; C:GO:0005773	P:ubiquitin-dependent protein catabolic process; P:response to UV-B; P:protein ubiquitination; F:protein tag; F:ubiquitin protein ligase binding; C:nucleus; C:vacuole			IPR019956 (PRINTS); G3DSA:3.10.20.90 (GENE3D); G3DSA:3.10.20.90 (GENE3D); IPR000626 (PFAM); PTHR10666:SF327 (PANTHER); PTHR10666 (PANTHER); IPR000626 (PROSITE_PROFILES); IPR000626 (PROSITE_PROFILES); IPR000626 (PROSITE_PROFILES); cd01803 (CDD); cd01803 (CDD); cd01803 (CDD); IPR029071 (SUPERFAMILY); IPR029071 (SUPERFAMILY); IPR029071 (SUPERFAMILY)	F:GO:0005515	F:protein binding
TRINITY_DN0_c0_g2_i2	ubiquitin 11	2.44233e-94	7	P:GO:0006511; P:GO:0010224; P:GO:0016567; F:GO:0031386; F:GO:0031625; C:GO:0005634; C:GO:0005773	P:ubiquitin-dependent protein catabolic process; P:response to UV-B; P:protein ubiquitination; F:protein tag; F:ubiquitin protein ligase binding; C:nucleus; C:vacuole			IPR019956 (PRINTS); G3DSA:3.10.20.90 (GENE3D); IPR000626 (PFAM); PTHR10666 (PANTHER); PTHR10666:SF327 (PANTHER); IPR000626 (PROSITE_PROFILES); cd01803 (CDD); IPR029071 (SUPERFAMILY)	F:GO:0005515	F:protein binding
TRINITY_DN0_c0_g2_i3	polyubiquitin 10	2.1535e-133	7	P:GO:0006511; P:GO:0010224; P:GO:0016567; F:GO:0031386; F:GO:0031625; C:GO:0005634; C:GO:0005773	P:ubiquitin-dependent protein catabolic process; P:response to UV-B; P:protein ubiquitination; F:protein tag; F:ubiquitin protein ligase binding; C:nucleus; C:vacuole			IPR019956 (PRINTS); G3DSA:3.10.20.90 (GENE3D); G3DSA:3.10.20.90 (GENE3D); IPR000626 (PFAM); PTHR10666 (PANTHER); PTHR10666:SF327 (PANTHER); IPR000626 (PROSITE_PROFILES); IPR000626 (PROSITE_PROFILES); cd01803 (CDD); cd01803 (CDD); IPR029071 (SUPERFAMILY); IPR029071 (SUPERFAMILY)	F:GO:0005515	F:protein binding
TRINITY_DN0_c0_g3_i1	ubiquitin 11	2.73878e-80	7	P:GO:0006511; P:GO:0010224; P:GO:0016567; F:GO:0031386; F:GO:0031625; C:GO:0005634; C:GO:0005773	P:ubiquitin-dependent protein catabolic process; P:response to UV-B; P:protein ubiquitination; F:protein tag; F:ubiquitin protein ligase binding; C:nucleus; C:vacuole			IPR019956 (PRINTS); G3DSA:3.10.20.90 (GENE3D); IPR000626 (PFAM); G3DSA:3.10.20.90 (GENE3D); PTHR10666:SF327 (PANTHER); PTHR10666 (PANTHER); IPR000626 (PROSITE_PROFILES); IPR000626 (PROSITE_PROFILES); cd01803 (CDD); cd01803 (CDD); IPR029071 (SUPERFAMILY); IPR029071 (SUPERFAMILY)	F:GO:0005515	F:protein binding
TRINITY_DN0_c1_g1_i1	ubiquitin 11	7.5175e-66	7	P:GO:0006511; P:GO:0010224; P:GO:0016567; F:GO:0031386; F:GO:0031625; C:GO:0005634; C:GO:0005773	P:ubiquitin-dependent protein catabolic process; P:response to UV-B; P:protein ubiquitination; F:protein tag; F:ubiquitin protein ligase binding; C:nucleus; C:vacuole			IPR019956 (PRINTS); G3DSA:3.10.20.90 (GENE3D); IPR000626 (PFAM); G3DSA:3.10.20.90 (GENE3D); PTHR10666 (PANTHER); PTHR10666:SF327 (PANTHER); IPR000626 (PROSITE_PROFILES); IPR000626 (PROSITE_PROFILES); cd01803 (CDD); cd01803 (CDD); IPR029071 (SUPERFAMILY); IPR029071 (SUPERFAMILY)	F:GO:0005515	F:protein binding
TRINITY_DN0_c1_g1_i2	ubiquitin 11	3.80589e-59	7	P:GO:0006511; P:GO:0010224; P:GO:0016567; F:GO:0031386; F:GO:0031625; C:GO:0005634; C:GO:0005773	P:ubiquitin-dependent protein catabolic process; P:response to UV-B; P:protein ubiquitination; F:protein tag; F:ubiquitin protein ligase binding; C:nucleus; C:vacuole			IPR019956 (PRINTS); G3DSA:3.10.20.90 (GENE3D); IPR000626 (PFAM); G3DSA:3.10.20.90 (GENE3D); PTHR10666 (PANTHER); PTHR10666:SF327 (PANTHER); IPR000626 (PROSITE_PROFILES); IPR000626 (PROSITE_PROFILES); cd01803 (CDD); cd01803 (CDD); IPR029071 (SUPERFAMILY); IPR029071 (SUPERFAMILY)	F:GO:0005515	F:protein binding
TRINITY_DN0_c1_g1_i3	Ubiquitin family protein	1.23524e-126	7	P:GO:0006511; P:GO:0010224; P:GO:0016567; F:GO:0031386; F:GO:0031625; C:GO:0005634; C:GO:0005773	P:ubiquitin-dependent protein catabolic process; P:response to UV-B; P:protein ubiquitination; F:protein tag; F:ubiquitin protein ligase binding; C:nucleus; C:vacuole			IPR019956 (PRINTS); G3DSA:3.10.20.90 (GENE3D); G3DSA:3.10.20.90 (GENE3D); IPR000626 (PFAM); PTHR10666 (PANTHER); PTHR10666:SF327 (PANTHER); IPR000626 (PROSITE_PROFILES); IPR000626 (PROSITE_PROFILES); IPR000626 (PROSITE_PROFILES); cd01803 (CDD); cd01803 (CDD); cd01803 (CDD); IPR029071 (SUPERFAMILY); IPR029071 (SUPERFAMILY); IPR029071 (SUPERFAMILY)	F:GO:0005515	F:protein binding
TRINITY_DN0_c1_g1_i4	ubiquitin 11	4.39822e-72	7	P:GO:0006511; P:GO:0010224; P:GO:0016567; F:GO:0031386; F:GO:0031625; C:GO:0005634; C:GO:0005773	P:ubiquitin-dependent protein catabolic process; P:response to UV-B; P:protein ubiquitination; F:protein tag; F:ubiquitin protein ligase binding; C:nucleus; C:vacuole			IPR019956 (PRINTS); IPR000626 (PFAM); G3DSA:3.10.20.90 (GENE3D); G3DSA:3.10.20.90 (GENE3D); PTHR10666:SF327 (PANTHER); PTHR10666 (PANTHER); IPR000626 (PROSITE_PROFILES); IPR000626 (PROSITE_PROFILES); cd01803 (CDD); cd01803 (CDD); IPR029071 (SUPERFAMILY); IPR029071 (SUPERFAMILY)	F:GO:0005515	F:protein binding
TRINITY_DN0_c1_g1_i5	ubiquitin 11	1.81716e-101	7	P:GO:0006511; P:GO:0010224; P:GO:0016567; F:GO:0031386; F:GO:0031625; C:GO:0005634; C:GO:0005773	P:ubiquitin-dependent protein catabolic process; P:response to UV-B; P:protein ubiquitination; F:protein tag; F:ubiquitin protein ligase binding; C:nucleus; C:vacuole			IPR019956 (PRINTS); G3DSA:3.10.20.90 (GENE3D); IPR000626 (PFAM); PTHR10666:SF327 (PANTHER); PTHR10666 (PANTHER); IPR000626 (PROSITE_PROFILES); IPR000626 (PROSITE_PROFILES); cd01803 (CDD); cd01803 (CDD); IPR029071 (SUPERFAMILY); IPR029071 (SUPERFAMILY)	F:GO:0005515	F:protein binding
TRINITY_DN0_c2_g1_i1	ubiquitin 11	7.44565e-50	7	P:GO:0006511; P:GO:0010224; P:GO:0016567; F:GO:0031386; F:GO:0031625; C:GO:0005634; C:GO:0005773	P:ubiquitin-dependent protein catabolic process; P:response to UV-B; P:protein ubiquitination; F:protein tag; F:ubiquitin protein ligase binding; C:nucleus; C:vacuole			IPR019956 (PRINTS); IPR000626 (PFAM); G3DSA:3.10.20.90 (GENE3D); G3DSA:3.10.20.90 (GENE3D); PTHR10666:SF327 (PANTHER); PTHR10666 (PANTHER); IPR000626 (PROSITE_PROFILES); cd01803 (CDD); cd01803 (CDD); IPR029071 (SUPERFAMILY)	F:GO:0005515	F:protein binding
TRINITY_DN1_c0_g1_i1	serine/threonine-protein phosphatase BSL3-like isoform X1	0	8	P:GO:0006470; P:GO:0009742; F:GO:0004722; F:GO:0005515; F:GO:0046872; C:GO:0005634; C:GO:0005829; C:GO:0005886	P:protein dephosphorylation; P:brassinosteroid mediated signaling pathway; F:protein serine/threonine phosphatase activity; F:protein binding; F:metal ion binding; C:nucleus; C:cytosol; C:plasma membrane	EC:3.1.3.16	Protein-serine/threonine phosphatase	PF13415 (PFAM); IPR015915 (G3DSA:2.120.10.GENE3D); PF13418 (PFAM); IPR011498 (PFAM); mobidb-lite (MOBIDB_LITE); mobidb-lite (MOBIDB_LITE); PTHR46422 (PANTHER); PTHR46422:SF7 (PANTHER); IPR015915 (SUPERFAMILY)	F:GO:0005515	F:protein binding
TRINITY_DN1_c0_g1_i2	serine/threonine-protein phosphatase BSL3-like isoform X1	0	8	P:GO:0006470; P:GO:0009742; F:GO:0004722; F:GO:0005515; F:GO:0046872; C:GO:0005634; C:GO:0005829; C:GO:0005886	P:protein dephosphorylation; P:brassinosteroid mediated signaling pathway; F:protein serine/threonine phosphatase activity; F:protein binding; F:metal ion binding; C:nucleus; C:cytosol; C:plasma membrane	EC:3.1.3.16	Protein-serine/threonine phosphatase	IPR006186 (PRINTS); IPR012391 (PIRSF); IPR029052 (G3DSA:3.60.21.GENE3D); IPR015915 (G3DSA:2.120.10.GENE3D); PF13415 (PFAM); IPR004843 (PFAM); IPR011498 (PFAM); mobidb-lite (MOBIDB_LITE); mobidb-lite (MOBIDB_LITE); mobidb-lite (MOBIDB_LITE); mobidb-lite (MOBIDB_LITE); mobidb-lite (MOBIDB_LITE); mobidb-lite (MOBIDB_LITE); PTHR46422 (PANTHER); PTHR46422:SF7 (PANTHER); IPR041758 (CDD); SSF56300 (SUPE…	P:GO:0009742; F:GO:0004721; F:GO:0005515; F:GO:0016787	P:brassinosteroid mediated signaling pathway; F:phosphoprotein phosphatase activity; F:protein binding; F:hydrolase activity
TRINITY_DN1_c0_g1_i3	serine/threonine-protein phosphatase BSL3-like isoform X1	0	8	P:GO:0006470; P:GO:0009742; F:GO:0004722; F:GO:0005515; F:GO:0046872; C:GO:0005634; C:GO:0005829; C:GO:0005886	P:protein dephosphorylation; P:brassinosteroid mediated signaling pathway; F:protein serine/threonine phosphatase activity; F:protein binding; F:metal ion binding; C:nucleus; C:cytosol; C:plasma membrane	EC:3.1.3.16	Protein-serine/threonine phosphatase	IPR006186 (PRINTS); IPR015915 (G3DSA:2.120.10.GENE3D); IPR029052 (G3DSA:3.60.21.GENE3D); PF13415 (PFAM); IPR012391 (PIRSF); IPR004843 (PFAM); IPR011498 (PFAM); mobidb-lite (MOBIDB_LITE); mobidb-lite (MOBIDB_LITE); mobidb-lite (MOBIDB_LITE); mobidb-lite (MOBIDB_LITE); mobidb-lite (MOBIDB_LITE); PTHR46422 (PANTHER); PTHR46422:SF7 (PANTHER); IPR041758 (CDD); SSF56300 (SUPERFAMILY); IPR015915 (SUPERF…	P:GO:0009742; F:GO:0004721; F:GO:0005515; F:GO:0016787	P:brassinosteroid mediated signaling pathway; F:phosphoprotein phosphatase activity; F:protein binding; F:hydrolase activity
TRINITY_DN1_c0_g1_i5	serine/threonine-protein phosphatase BSL3-like isoform X1	0	8	P:GO:0006470; P:GO:0009742; F:GO:0004722; F:GO:0005515; F:GO:0046872; C:GO:0005634; C:GO:0005829; C:GO:0005886	P:protein dephosphorylation; P:brassinosteroid mediated signaling pathway; F:protein serine/threonine phosphatase activity; F:protein binding; F:metal ion binding; C:nucleus; C:cytosol; C:plasma membrane	EC:3.1.3.16	Protein-serine/threonine phosphatase	IPR006186 (PRINTS); IPR015915 (G3DSA:2.120.10.GENE3D); PF13415 (PFAM); IPR012391 (PIRSF); IPR004843 (PFAM); IPR029052 (G3DSA:3.60.21.GENE3D); IPR011498 (PFAM); mobidb-lite (MOBIDB_LITE); mobidb-lite (MOBIDB_LITE); mobidb-lite (MOBIDB_LITE); mobidb-lite (MOBIDB_LITE); mobidb-lite (MOBIDB_LITE); PTHR46422 (PANTHER); PTHR46422:SF7 (PANTHER); IPR041758 (CDD); IPR015915 (SUPERFAMILY); SSF56300 (SUPERF…	P:GO:0009742; F:GO:0004721; F:GO:0005515; F:GO:0016787	P:brassinosteroid mediated signaling pathway; F:phosphoprotein phosphatase activity; F:protein binding; F:hydrolase activity
TRINITY_DN1_c0_g2_i1	Mitogen-activated protein kinase kinase 4	3.80711e-14	7	P:GO:0007346; P:GO:0023014; P:GO:0031098; P:GO:0032147; F:GO:0004674; F:GO:0005524; C:GO:0005737	P:regulation of mitotic cell cycle; P:signal transduction by protein phosphorylation; P:stress-activated protein kinase signaling cascade; P:activation of protein kinase activity; F:protein serine/threonine kinase activity; F:ATP binding; C:cytoplasm			no IPS match	no IPS match	no IPS match
TRINITY_DN1_c1_g1_i1	Chaperone DnaJ-domain superfamily protein	3.0308e-14						mobidb-lite (MOBIDB_LITE); PTHR46620:SF2 (PANTHER); PTHR46620 (PANTHER)	no GO terms	no GO terms
TRINITY_DN1_c1_g1_i2	Chaperone DnaJ-domain superfamily protein	1.37096e-112	1	C:GO:0035145	C:exon-exon junction complex			IPR001623 (PRINTS); IPR001623 (PFAM); IPR036869 (G3DSA:1.10.287.GENE3D); mobidb-lite (MOBIDB_LITE); mobidb-lite (MOBIDB_LITE); PTHR46620:SF2 (PANTHER); PTHR46620 (PANTHER); IPR001623 (PROSITE_PROFILES); IPR001623 (CDD); IPR036869 (SUPERFAMILY)	no GO terms	no GO terms
TRINITY_DN1_c1_g1_i3	Chaperone DnaJ-domain superfamily protein	3.82114e-113	1	C:GO:0035145	C:exon-exon junction complex			IPR001623 (PRINTS); IPR001623 (PFAM); IPR036869 (G3DSA:1.10.287.GENE3D); mobidb-lite (MOBIDB_LITE); mobidb-lite (MOBIDB_LITE); PTHR46620:SF2 (PANTHER); PTHR46620 (PANTHER); IPR001623 (PROSITE_PROFILES); IPR001623 (CDD); IPR036869 (SUPERFAMILY)	no GO terms	no GO terms
TRINITY_DN1_c1_g1_i4	Chaperone DnaJ-domain superfamily protein	1.12466e-75	1	C:GO:0035145	C:exon-exon junction complex			IPR001623 (PFAM); IPR036869 (G3DSA:1.10.287.GENE3D); mobidb-lite (MOBIDB_LITE); PTHR46620 (PANTHER); PTHR46620:SF2 (PANTHER); IPR001623 (PROSITE_PROFILES); IPR001623 (CDD); IPR036869 (SUPERFAMILY)	no GO terms	no GO terms
TRINITY_DN10_c0_g1_i1	AP-2 complex subunit sigma	0	5	P:GO:0015031; P:GO:0016192; C:GO:0005886; C:GO:0016021; C:GO:0043231	P:protein transport; P:vesicle-mediated transport; C:plasma membrane; C:integral component of membrane; C:intracellular membrane-bounded organelle			mobidb-lite (MOBIDB_LITE); mobidb-lite (MOBIDB_LITE); mobidb-lite (MOBIDB_LITE); mobidb-lite (MOBIDB_LITE); mobidb-lite (MOBIDB_LITE); mobidb-lite (MOBIDB_LITE); mobidb-lite (MOBIDB_LITE); mobidb-lite (MOBIDB_LITE); IPR040305 (PANTHER)	no GO terms	no GO terms
TRINITY_DN10_c0_g1_i10	AP-2 complex subunit sigma	0	5	P:GO:0006886; P:GO:0006897; C:GO:0005905; C:GO:0016021; C:GO:0043231	P:intracellular protein transport; P:endocytosis; C:clathrin-coated pit; C:integral component of membrane; C:intracellular membrane-bounded organelle			mobidb-lite (MOBIDB_LITE); mobidb-lite (MOBIDB_LITE); IPR040305 (PANTHER)	no GO terms	no GO terms
TRINITY_DN10_c0_g1_i11	AP-2 complex subunit sigma	0	5	P:GO:0015031; P:GO:0016192; C:GO:0005886; C:GO:0016021; C:GO:0043231	P:protein transport; P:vesicle-mediated transport; C:plasma membrane; C:integral component of membrane; C:intracellular membrane-bounded organelle			IPR040305 (PANTHER)	no GO terms	no GO terms
TRINITY_DN10_c0_g1_i12	AP-2 complex subunit sigma	0	5	P:GO:0015031; P:GO:0016192; C:GO:0005886; C:GO:0016021; C:GO:0043231	P:protein transport; P:vesicle-mediated transport; C:plasma membrane; C:integral component of membrane; C:intracellular membrane-bounded organelle			IPR040305 (PANTHER)	no GO terms	no GO terms
TRINITY_DN10_c0_g1_i13	AP-2 complex subunit sigma	0	6	P:GO:0006886; P:GO:0006897; C:GO:0005905; C:GO:0016021; C:GO:0031410; C:GO:0043231	P:intracellular protein transport; P:endocytosis; C:clathrin-coated pit; C:integral component of membrane; C:cytoplasmic vesicle; C:intracellular membrane-bounded organelle			IPR040305 (PANTHER)	no GO terms	no GO terms
TRINITY_DN10_c0_g1_i14	AP-2 complex subunit sigma	0	5	P:GO:0006886; P:GO:0006897; C:GO:0005905; C:GO:0016021; C:GO:0043231	P:intracellular protein transport; P:endocytosis; C:clathrin-coated pit; C:integral component of membrane; C:intracellular membrane-bounded organelle			mobidb-lite (MOBIDB_LITE); mobidb-lite (MOBIDB_LITE); mobidb-lite (MOBIDB_LITE); mobidb-lite (MOBIDB_LITE); mobidb-lite (MOBIDB_LITE); mobidb-lite (MOBIDB_LITE); mobidb-lite (MOBIDB_LITE); mobidb-lite (MOBIDB_LITE); IPR040305 (PANTHER)	no GO terms	no GO terms
TRINITY_DN10_c0_g1_i16	AP-2 complex subunit sigma	0	5	P:GO:0006886; P:GO:0006897; C:GO:0005905; C:GO:0016021; C:GO:0043231	P:intracellular protein transport; P:endocytosis; C:clathrin-coated pit; C:integral component of membrane; C:intracellular membrane-bounded organelle			mobidb-lite (MOBIDB_LITE); mobidb-lite (MOBIDB_LITE); IPR040305 (PANTHER)	no GO terms	no GO terms
TRINITY_DN10_c0_g1_i17	AP-2 complex subunit sigma	0	5	P:GO:0015031; P:GO:0016192; C:GO:0005886; C:GO:0016021; C:GO:0043231	P:protein transport; P:vesicle-mediated transport; C:plasma membrane; C:integral component of membrane; C:intracellular membrane-bounded organelle			mobidb-lite (MOBIDB_LITE); mobidb-lite (MOBIDB_LITE); mobidb-lite (MOBIDB_LITE); IPR040305 (PANTHER)	no GO terms	no GO terms
TRINITY_DN10_c0_g1_i18	AP-2 complex subunit sigma	0	5	P:GO:0006886; P:GO:0006897; C:GO:0005905; C:GO:0016021; C:GO:0043231	P:intracellular protein transport; P:endocytosis; C:clathrin-coated pit; C:integral component of membrane; C:intracellular membrane-bounded organelle			mobidb-lite (MOBIDB_LITE); mobidb-lite (MOBIDB_LITE); mobidb-lite (MOBIDB_LITE); IPR040305 (PANTHER)	no GO terms	no GO terms
TRINITY_DN10_c0_g1_i19	AP-2 complex subunit sigma	0	6	P:GO:0006886; P:GO:0006897; C:GO:0005905; C:GO:0016021; C:GO:0031410; C:GO:0043231	P:intracellular protein transport; P:endocytosis; C:clathrin-coated pit; C:integral component of membrane; C:cytoplasmic vesicle; C:intracellular membrane-bounded organelle			IPR040305 (PANTHER)	no GO terms	no GO terms
TRINITY_DN10_c0_g1_i2	AP-2 complex subunit sigma	0	5	P:GO:0006886; P:GO:0006897; C:GO:0005905; C:GO:0016021; C:GO:0043231	P:intracellular protein transport; P:endocytosis; C:clathrin-coated pit; C:integral component of membrane; C:intracellular membrane-bounded organelle			mobidb-lite (MOBIDB_LITE); mobidb-lite (MOBIDB_LITE); mobidb-lite (MOBIDB_LITE); IPR040305 (PANTHER)	no GO terms	no GO terms
TRINITY_DN10_c0_g1_i20	AP-2 complex subunit sigma	0	5	P:GO:0006886; P:GO:0006897; C:GO:0005905; C:GO:0016021; C:GO:0043231	P:intracellular protein transport; P:endocytosis; C:clathrin-coated pit; C:integral component of membrane; C:intracellular membrane-bounded organelle			mobidb-lite (MOBIDB_LITE); mobidb-lite (MOBIDB_LITE); mobidb-lite (MOBIDB_LITE); IPR040305 (PANTHER)	no GO terms	no GO terms
TRINITY_DN10_c0_g1_i21	AP-2 complex subunit sigma	0	5	P:GO:0015031; P:GO:0016192; C:GO:0005886; C:GO:0016021; C:GO:0043231	P:protein transport; P:vesicle-mediated transport; C:plasma membrane; C:integral component of membrane; C:intracellular membrane-bounded organelle			mobidb-lite (MOBIDB_LITE); mobidb-lite (MOBIDB_LITE); mobidb-lite (MOBIDB_LITE); IPR040305 (PANTHER)	no GO terms	no GO terms
TRINITY_DN10_c0_g1_i22	AP-2 complex subunit sigma	0	5	P:GO:0006886; P:GO:0006897; C:GO:0005905; C:GO:0016021; C:GO:0043231	P:intracellular protein transport; P:endocytosis; C:clathrin-coated pit; C:integral component of membrane; C:intracellular membrane-bounded organelle			mobidb-lite (MOBIDB_LITE); mobidb-lite (MOBIDB_LITE); mobidb-lite (MOBIDB_LITE); mobidb-lite (MOBIDB_LITE); mobidb-lite (MOBIDB_LITE); mobidb-lite (MOBIDB_LITE); mobidb-lite (MOBIDB_LITE); mobidb-lite (MOBIDB_LITE); mobidb-lite (MOBIDB_LITE); IPR040305 (PANTHER)	no GO terms	no GO terms
TRINITY_DN10_c0_g1_i23	AP-2 complex subunit sigma	0	5	P:GO:0006886; P:GO:0006897; C:GO:0005905; C:GO:0016021; C:GO:0043231	P:intracellular protein transport; P:endocytosis; C:clathrin-coated pit; C:integral component of membrane; C:intracellular membrane-bounded organelle			mobidb-lite (MOBIDB_LITE); mobidb-lite (MOBIDB_LITE); mobidb-lite (MOBIDB_LITE); mobidb-lite (MOBIDB_LITE); mobidb-lite (MOBIDB_LITE); mobidb-lite (MOBIDB_LITE); mobidb-lite (MOBIDB_LITE); mobidb-lite (MOBIDB_LITE); IPR040305 (PANTHER)	no GO terms	no GO terms
TRINITY_DN10_c0_g1_i24	AP-2 complex subunit sigma	0	5	P:GO:0006886; P:GO:0006897; C:GO:0005905; C:GO:0016021; C:GO:0043231	P:intracellular protein transport; P:endocytosis; C:clathrin-coated pit; C:integral component of membrane; C:intracellular membrane-bounded organelle			mobidb-lite (MOBIDB_LITE); mobidb-lite (MOBIDB_LITE); mobidb-lite (MOBIDB_LITE); mobidb-lite (MOBIDB_LITE); mobidb-lite (MOBIDB_LITE); mobidb-lite (MOBIDB_LITE); mobidb-lite (MOBIDB_LITE); mobidb-lite (MOBIDB_LITE); mobidb-lite (MOBIDB_LITE); IPR040305 (PANTHER)	no GO terms	no GO terms
TRINITY_DN10_c0_g1_i25	AP-2 complex subunit sigma	0	5	P:GO:0006886; P:GO:0006897; C:GO:0005905; C:GO:0016021; C:GO:0043231	P:intracellular protein transport; P:endocytosis; C:clathrin-coated pit; C:integral component of membrane; C:intracellular membrane-bounded organelle			mobidb-lite (MOBIDB_LITE); mobidb-lite (MOBIDB_LITE); mobidb-lite (MOBIDB_LITE); mobidb-lite (MOBIDB_LITE); mobidb-lite (MOBIDB_LITE); mobidb-lite (MOBIDB_LITE); mobidb-lite (MOBIDB_LITE); mobidb-lite (MOBIDB_LITE); IPR040305 (PANTHER)	no GO terms	no GO terms
TRINITY_DN10_c0_g1_i26	AP-2 complex subunit sigma	0	5	P:GO:0006886; P:GO:0006897; C:GO:0005905; C:GO:0016021; C:GO:0043231	P:intracellular protein transport; P:endocytosis; C:clathrin-coated pit; C:integral component of membrane; C:intracellular membrane-bounded organelle			mobidb-lite (MOBIDB_LITE); mobidb-lite (MOBIDB_LITE); mobidb-lite (MOBIDB_LITE); mobidb-lite (MOBIDB_LITE); mobidb-lite (MOBIDB_LITE); mobidb-lite (MOBIDB_LITE); mobidb-lite (MOBIDB_LITE); mobidb-lite (MOBIDB_LITE); mobidb-lite (MOBIDB_LITE); IPR040305 (PANTHER)	no GO terms	no GO terms
TRINITY_DN10_c0_g1_i27	AP-2 complex subunit sigma	0	5	P:GO:0006886; P:GO:0006897; C:GO:0005905; C:GO:0016021; C:GO:0043231	P:intracellular protein transport; P:endocytosis; C:clathrin-coated pit; C:integral component of membrane; C:intracellular membrane-bounded organelle			IPR040305 (PANTHER)	no GO terms	no GO terms
TRINITY_DN10_c0_g1_i28	AP-2 complex subunit sigma	0	5	P:GO:0006886; P:GO:0006897; C:GO:0005905; C:GO:0016021; C:GO:0043231	P:intracellular protein transport; P:endocytosis; C:clathrin-coated pit; C:integral component of membrane; C:intracellular membrane-bounded organelle			mobidb-lite (MOBIDB_LITE); mobidb-lite (MOBIDB_LITE); IPR040305 (PANTHER)	no GO terms	no GO terms
TRINITY_DN10_c0_g1_i29	AP-2 complex subunit sigma	0	5	P:GO:0006886; P:GO:0006897; C:GO:0005905; C:GO:0016021; C:GO:0043231	P:intracellular protein transport; P:endocytosis; C:clathrin-coated pit; C:integral component of membrane; C:intracellular membrane-bounded organelle			mobidb-lite (MOBIDB_LITE); mobidb-lite (MOBIDB_LITE); mobidb-lite (MOBIDB_LITE); mobidb-lite (MOBIDB_LITE); mobidb-lite (MOBIDB_LITE); mobidb-lite (MOBIDB_LITE); mobidb-lite (MOBIDB_LITE); mobidb-lite (MOBIDB_LITE); mobidb-lite (MOBIDB_LITE); IPR040305 (PANTHER)	no GO terms	no GO terms
TRINITY_DN10_c0_g1_i3	AP-2 complex subunit sigma	0	5	P:GO:0006886; P:GO:0006897; C:GO:0005905; C:GO:0016021; C:GO:0043231	P:intracellular protein transport; P:endocytosis; C:clathrin-coated pit; C:integral component of membrane; C:intracellular membrane-bounded organelle			mobidb-lite (MOBIDB_LITE); mobidb-lite (MOBIDB_LITE); mobidb-lite (MOBIDB_LITE); IPR040305 (PANTHER)	no GO terms	no GO terms
TRINITY_DN10_c0_g1_i30	AP-2 complex subunit sigma	0	5	P:GO:0006886; P:GO:0006897; C:GO:0005905; C:GO:0016021; C:GO:0043231	P:intracellular protein transport; P:endocytosis; C:clathrin-coated pit; C:integral component of membrane; C:intracellular membrane-bounded organelle			mobidb-lite (MOBIDB_LITE); mobidb-lite (MOBIDB_LITE); mobidb-lite (MOBIDB_LITE); IPR040305 (PANTHER)	no GO terms	no GO terms
TRINITY_DN10_c0_g1_i31	AP-2 complex subunit sigma	0	5	P:GO:0006886; P:GO:0006897; C:GO:0005905; C:GO:0016021; C:GO:0043231	P:intracellular protein transport; P:endocytosis; C:clathrin-coated pit; C:integral component of membrane; C:intracellular membrane-bounded organelle			mobidb-lite (MOBIDB_LITE); mobidb-lite (MOBIDB_LITE); mobidb-lite (MOBIDB_LITE); IPR040305 (PANTHER)	no GO terms	no GO terms
TRINITY_DN10_c0_g1_i32	AP-2 complex subunit sigma	0	5	P:GO:0006886; P:GO:0006897; C:GO:0005905; C:GO:0016021; C:GO:0043231	P:intracellular protein transport; P:endocytosis; C:clathrin-coated pit; C:integral component of membrane; C:intracellular membrane-bounded organelle			mobidb-lite (MOBIDB_LITE); mobidb-lite (MOBIDB_LITE); mobidb-lite (MOBIDB_LITE); mobidb-lite (MOBIDB_LITE); mobidb-lite (MOBIDB_LITE); mobidb-lite (MOBIDB_LITE); mobidb-lite (MOBIDB_LITE); mobidb-lite (MOBIDB_LITE); IPR040305 (PANTHER)	no GO terms	no GO terms
TRINITY_DN10_c0_g1_i5	AP-2 complex subunit sigma	0	5	P:GO:0015031; P:GO:0016192; C:GO:0005886; C:GO:0016021; C:GO:0043231	P:protein transport; P:vesicle-mediated transport; C:plasma membrane; C:integral component of membrane; C:intracellular membrane-bounded organelle			mobidb-lite (MOBIDB_LITE); mobidb-lite (MOBIDB_LITE); mobidb-lite (MOBIDB_LITE); mobidb-lite (MOBIDB_LITE); mobidb-lite (MOBIDB_LITE); mobidb-lite (MOBIDB_LITE); mobidb-lite (MOBIDB_LITE); mobidb-lite (MOBIDB_LITE); mobidb-lite (MOBIDB_LITE); IPR040305 (PANTHER)	no GO terms	no GO terms
TRINITY_DN10_c0_g1_i6	AP-2 complex subunit sigma	0	5	P:GO:0006886; P:GO:0006897; C:GO:0005905; C:GO:0016021; C:GO:0043231	P:intracellular protein transport; P:endocytosis; C:clathrin-coated pit; C:integral component of membrane; C:intracellular membrane-bounded organelle			mobidb-lite (MOBIDB_LITE); mobidb-lite (MOBIDB_LITE); mobidb-lite (MOBIDB_LITE); mobidb-lite (MOBIDB_LITE); mobidb-lite (MOBIDB_LITE); mobidb-lite (MOBIDB_LITE); mobidb-lite (MOBIDB_LITE); mobidb-lite (MOBIDB_LITE); mobidb-lite (MOBIDB_LITE); IPR040305 (PANTHER)	no GO terms	no GO terms
TRINITY_DN10_c0_g1_i7	AP-2 complex subunit sigma	0	5	P:GO:0015031; P:GO:0016192; C:GO:0005886; C:GO:0016021; C:GO:0043231	P:protein transport; P:vesicle-mediated transport; C:plasma membrane; C:integral component of membrane; C:intracellular membrane-bounded organelle			mobidb-lite (MOBIDB_LITE); mobidb-lite (MOBIDB_LITE); mobidb-lite (MOBIDB_LITE); mobidb-lite (MOBIDB_LITE); mobidb-lite (MOBIDB_LITE); mobidb-lite (MOBIDB_LITE); mobidb-lite (MOBIDB_LITE); mobidb-lite (MOBIDB_LITE); mobidb-lite (MOBIDB_LITE); IPR040305 (PANTHER)	no GO terms	no GO terms
TRINITY_DN10_c0_g1_i8	AP-2 complex subunit sigma	0	5	P:GO:0006886; P:GO:0006897; C:GO:0005905; C:GO:0016021; C:GO:0043231	P:intracellular protein transport; P:endocytosis; C:clathrin-coated pit; C:integral component of membrane; C:intracellular membrane-bounded organelle			mobidb-lite (MOBIDB_LITE); mobidb-lite (MOBIDB_LITE); mobidb-lite (MOBIDB_LITE); IPR040305 (PANTHER)	no GO terms	no GO terms
TRINITY_DN10_c0_g1_i9	AP-2 complex subunit sigma	0	5	P:GO:0006886; P:GO:0006897; C:GO:0005905; C:GO:0016021; C:GO:0043231	P:intracellular protein transport; P:endocytosis; C:clathrin-coated pit; C:integral component of membrane; C:intracellular membrane-bounded organelle			IPR040305 (PANTHER)	no GO terms	no GO terms
TRINITY_DN100_c0_g1_i1	photolyase/blue-light receptor 2	0	4	P:GO:0000719; P:GO:0018298; F:GO:0009881; F:GO:0016829	P:photoreactive repair; P:protein-chromophore linkage; F:photoreceptor activity; F:lyase activity			IPR006050 (PFAM); IPR014729 (G3DSA:3.40.50.GENE3D); G3DSA:1.25.40.80 (GENE3D); mobidb-lite (MOBIDB_LITE); mobidb-lite (MOBIDB_LITE); mobidb-lite (MOBIDB_LITE); mobidb-lite (MOBIDB_LITE); PTHR11455:SF2 (PANTHER); PTHR11455 (PANTHER); IPR006050 (PROSITE_PROFILES); IPR036134 (SUPERFAMILY); IPR036155 (SUPERFAMILY)	no GO terms	no GO terms
TRINITY_DN100_c0_g1_i2	photolyase/blue-light receptor 2	0	4	P:GO:0000719; P:GO:0018298; F:GO:0009881; F:GO:0016829	P:photoreactive repair; P:protein-chromophore linkage; F:photoreceptor activity; F:lyase activity			IPR006050 (PFAM); G3DSA:1.25.40.80 (GENE3D); IPR014729 (G3DSA:3.40.50.GENE3D); mobidb-lite (MOBIDB_LITE); mobidb-lite (MOBIDB_LITE); mobidb-lite (MOBIDB_LITE); mobidb-lite (MOBIDB_LITE); mobidb-lite (MOBIDB_LITE); PTHR11455:SF2 (PANTHER); PTHR11455 (PANTHER); IPR006050 (PROSITE_PROFILES); IPR036134 (SUPERFAMILY); IPR036155 (SUPERFAMILY)	no GO terms	no GO terms
TRINITY_DN100_c0_g1_i3	photolyase/blue-light receptor 2	0	4	P:GO:0000719; P:GO:0018298; F:GO:0009881; F:GO:0016829	P:photoreactive repair; P:protein-chromophore linkage; F:photoreceptor activity; F:lyase activity			IPR014729 (G3DSA:3.40.50.GENE3D); IPR006050 (PFAM); G3DSA:1.25.40.80 (GENE3D); mobidb-lite (MOBIDB_LITE); mobidb-lite (MOBIDB_LITE); mobidb-lite (MOBIDB_LITE); mobidb-lite (MOBIDB_LITE); PTHR11455 (PANTHER); PTHR11455:SF2 (PANTHER); IPR006050 (PROSITE_PROFILES); IPR036155 (SUPERFAMILY); IPR036134 (SUPERFAMILY)	no GO terms	no GO terms
TRINITY_DN100_c0_g1_i4	photolyase/blue-light receptor 2	0	4	P:GO:0000719; P:GO:0018298; F:GO:0009881; F:GO:0016829	P:photoreactive repair; P:protein-chromophore linkage; F:photoreceptor activity; F:lyase activity			IPR014729 (G3DSA:3.40.50.GENE3D); IPR006050 (PFAM); G3DSA:1.25.40.80 (GENE3D); mobidb-lite (MOBIDB_LITE); mobidb-lite (MOBIDB_LITE); mobidb-lite (MOBIDB_LITE); PTHR11455:SF2 (PANTHER); PTHR11455 (PANTHER); IPR006050 (PROSITE_PROFILES); IPR036155 (SUPERFAMILY); IPR036134 (SUPERFAMILY)	no GO terms	no GO terms
TRINITY_DN100_c0_g1_i6	photolyase/blue-light receptor 2	0	4	P:GO:0000719; P:GO:0018298; F:GO:0009881; F:GO:0016829	P:photoreactive repair; P:protein-chromophore linkage; F:photoreceptor activity; F:lyase activity			IPR014729 (G3DSA:3.40.50.GENE3D); IPR006050 (PFAM); G3DSA:1.25.40.80 (GENE3D); mobidb-lite (MOBIDB_LITE); mobidb-lite (MOBIDB_LITE); mobidb-lite (MOBIDB_LITE); mobidb-lite (MOBIDB_LITE); PTHR11455 (PANTHER); PTHR11455:SF2 (PANTHER); IPR006050 (PROSITE_PROFILES); IPR036155 (SUPERFAMILY); IPR036134 (SUPERFAMILY)	no GO terms	no GO terms
TRINITY_DN100_c0_g1_i7	photolyase/blue-light receptor 2	0	4	P:GO:0000719; P:GO:0018298; F:GO:0009881; F:GO:0016829	P:photoreactive repair; P:protein-chromophore linkage; F:photoreceptor activity; F:lyase activity			G3DSA:1.25.40.80 (GENE3D); IPR006050 (PFAM); IPR014729 (G3DSA:3.40.50.GENE3D); mobidb-lite (MOBIDB_LITE); mobidb-lite (MOBIDB_LITE); mobidb-lite (MOBIDB_LITE); PTHR11455:SF2 (PANTHER); PTHR11455 (PANTHER); IPR006050 (PROSITE_PROFILES); IPR036134 (SUPERFAMILY); IPR036155 (SUPERFAMILY)	no GO terms	no GO terms
TRINITY_DN100_c1_g1_i1	---NA---							no IPS match	no IPS match	no IPS match
TRINITY_DN1000_c0_g1_i1	Fes1A	0	4	P:GO:0050790; F:GO:0000774; C:GO:0005783; C:GO:0016021	P:regulation of catalytic activity; F:adenyl-nucleotide exchange factor activity; C:endoplasmic reticulum; C:integral component of membrane			IPR011989 (G3DSA:1.25.10.GENE3D); IPR013918 (PFAM); PTHR19316 (PANTHER); PTHR19316:SF29 (PANTHER); IPR016024 (SUPERFAMILY)	no GO terms	no GO terms
TRINITY_DN1000_c0_g1_i2	Fes1A	0	4	P:GO:0050790; F:GO:0000774; C:GO:0005783; C:GO:0016021	P:regulation of catalytic activity; F:adenyl-nucleotide exchange factor activity; C:endoplasmic reticulum; C:integral component of membrane			IPR013918 (PFAM); IPR011989 (G3DSA:1.25.10.GENE3D); PTHR19316 (PANTHER); PTHR19316:SF29 (PANTHER); IPR016024 (SUPERFAMILY)	no GO terms	no GO terms
TRINITY_DN1000_c0_g1_i3	Fes1A	0	4	P:GO:0050790; F:GO:0000774; C:GO:0005783; C:GO:0016020	P:regulation of catalytic activity; F:adenyl-nucleotide exchange factor activity; C:endoplasmic reticulum; C:membrane			IPR011989 (G3DSA:1.25.10.GENE3D); IPR013918 (PFAM); PTHR19316 (PANTHER); PTHR19316:SF29 (PANTHER); IPR016024 (SUPERFAMILY)	no GO terms	no GO terms
TRINITY_DN1000_c0_g1_i4	Fes1A	0	4	P:GO:0050790; F:GO:0000774; C:GO:0005783; C:GO:0016020	P:regulation of catalytic activity; F:adenyl-nucleotide exchange factor activity; C:endoplasmic reticulum; C:membrane			IPR011989 (G3DSA:1.25.10.GENE3D); IPR013918 (PFAM); PTHR19316 (PANTHER); PTHR19316:SF29 (PANTHER); IPR016024 (SUPERFAMILY)	no GO terms	no GO terms
TRINITY_DN1000_c1_g1_i1	DEA(D/H)-box RNA helicase family protein	0	5	P:GO:0009553; F:GO:0003723; F:GO:0003724; F:GO:0005524; C:GO:0005730	P:embryo sac development; F:RNA binding; F:RNA helicase activity; F:ATP binding; C:nucleolus	EC:3.6.1.3; EC:3.6.4.13; EC:3.6.1.15	Adenosinetriphosphatase; RNA helicase; Nucleoside-triphosphate phosphatase	IPR011545 (PFAM); G3DSA:3.40.50.300 (GENE3D); IPR001650 (PFAM); G3DSA:3.40.50.300 (GENE3D); mobidb-lite (MOBIDB_LITE); mobidb-lite (MOBIDB_LITE); mobidb-lite (MOBIDB_LITE); mobidb-lite (MOBIDB_LITE); mobidb-lite (MOBIDB_LITE); mobidb-lite (MOBIDB_LITE); mobidb-lite (MOBIDB_LITE); PTHR24031 (PANTHER); PTHR24031:SF637 (PANTHER); IPR014014 (PROSITE_PROFILES); IPR001650 (PROSITE_PROFILES); IPR014001 …	F:GO:0003676; F:GO:0005524	F:nucleic acid binding; F:ATP binding
TRINITY_DN1000_c1_g1_i10	DEA(D/H)-box RNA helicase family protein	2.39471e-131	4	F:GO:0000166; F:GO:0003723; F:GO:0003724; C:GO:0005730	F:nucleotide binding; F:RNA binding; F:RNA helicase activity; C:nucleolus	EC:3.6.1.3; EC:3.6.4.13; EC:3.6.1.15	Adenosinetriphosphatase; RNA helicase; Nucleoside-triphosphate phosphatase	IPR001650 (PFAM); G3DSA:3.40.50.300 (GENE3D); PTHR24031 (PANTHER); PTHR24031:SF637 (PANTHER); cd18787 (CDD); cd17947 (CDD); IPR027417 (SUPERFAMILY)	no GO terms	no GO terms
TRINITY_DN1000_c1_g1_i11	DEAD-box ATP-dependent RNA helicase 28 isoform X2	1.06942e-13	4	F:GO:0003723; F:GO:0003724; F:GO:0005524; C:GO:0005730	F:RNA binding; F:RNA helicase activity; F:ATP binding; C:nucleolus	EC:3.6.1.3; EC:3.6.4.13; EC:3.6.1.15	Adenosinetriphosphatase; RNA helicase; Nucleoside-triphosphate phosphatase	mobidb-lite (MOBIDB_LITE)	no GO terms	no GO terms
TRINITY_DN1000_c1_g1_i12	DEA(D/H)-box RNA helicase family protein	6.61688e-82	4	F:GO:0000166; F:GO:0003723; F:GO:0003724; C:GO:0005730	F:nucleotide binding; F:RNA binding; F:RNA helicase activity; C:nucleolus	EC:3.6.1.3; EC:3.6.4.13; EC:3.6.1.15	Adenosinetriphosphatase; RNA helicase; Nucleoside-triphosphate phosphatase	G3DSA:3.40.50.300 (GENE3D); mobidb-lite (MOBIDB_LITE); mobidb-lite (MOBIDB_LITE); mobidb-lite (MOBIDB_LITE); mobidb-lite (MOBIDB_LITE); PTHR24031:SF637 (PANTHER); PTHR24031 (PANTHER); IPR014014 (PROSITE_PROFILES); cd17947 (CDD); IPR027417 (SUPERFAMILY)	no GO terms	no GO terms
TRINITY_DN1000_c1_g1_i13	DEA(D/H)-box RNA helicase family protein	1.95072e-116	3	F:GO:0003676; F:GO:0004386; C:GO:0005634	F:nucleic acid binding; F:helicase activity; C:nucleus	EC:3.6.1.3; EC:3.6.1.15	Adenosinetriphosphatase; Nucleoside-triphosphate phosphatase	G3DSA:3.40.50.300 (GENE3D); mobidb-lite (MOBIDB_LITE); mobidb-lite (MOBIDB_LITE); mobidb-lite (MOBIDB_LITE); mobidb-lite (MOBIDB_LITE); PTHR24031:SF637 (PANTHER); PTHR24031 (PANTHER); IPR014014 (PROSITE_PROFILES); cd17947 (CDD); IPR027417 (SUPERFAMILY)	no GO terms	no GO terms
TRINITY_DN1000_c1_g1_i14	DEA(D/H)-box RNA helicase family protein	1.16492e-121	4	F:GO:0000166; F:GO:0003723; F:GO:0003724; C:GO:0005730	F:nucleotide binding; F:RNA binding; F:RNA helicase activity; C:nucleolus	EC:3.6.1.3; EC:3.6.4.13; EC:3.6.1.15	Adenosinetriphosphatase; RNA helicase; Nucleoside-triphosphate phosphatase	IPR001650 (PFAM); G3DSA:3.40.50.300 (GENE3D); PTHR24031 (PANTHER); PTHR24031:SF637 (PANTHER); cd18787 (CDD); cd17947 (CDD); IPR027417 (SUPERFAMILY)	no GO terms	no GO terms
TRINITY_DN1000_c1_g1_i2	DEA(D/H)-box RNA helicase family protein	0	5	P:GO:0009553; F:GO:0003723; F:GO:0003724; F:GO:0005524; C:GO:0005730	P:embryo sac development; F:RNA binding; F:RNA helicase activity; F:ATP binding; C:nucleolus	EC:3.6.1.3; EC:3.6.4.13; EC:3.6.1.15	Adenosinetriphosphatase; RNA helicase; Nucleoside-triphosphate phosphatase	G3DSA:3.40.50.300 (GENE3D); G3DSA:3.40.50.300 (GENE3D); IPR001650 (PFAM); IPR011545 (PFAM); mobidb-lite (MOBIDB_LITE); mobidb-lite (MOBIDB_LITE); mobidb-lite (MOBIDB_LITE); PTHR24031 (PANTHER); PTHR24031:SF637 (PANTHER); IPR014014 (PROSITE_PROFILES); IPR001650 (PROSITE_PROFILES); IPR014001 (PROSITE_PROFILES); cd18787 (CDD); cd17947 (CDD); IPR027417 (SUPERFAMILY)	F:GO:0003676; F:GO:0005524	F:nucleic acid binding; F:ATP binding
TRINITY_DN1000_c1_g1_i3	DEA(D/H)-box RNA helicase family protein	0	5	P:GO:0009553; F:GO:0003723; F:GO:0003724; F:GO:0005524; C:GO:0005730	P:embryo sac development; F:RNA binding; F:RNA helicase activity; F:ATP binding; C:nucleolus	EC:3.6.1.3; EC:3.6.4.13; EC:3.6.1.15	Adenosinetriphosphatase; RNA helicase; Nucleoside-triphosphate phosphatase	G3DSA:3.40.50.300 (GENE3D); G3DSA:3.40.50.300 (GENE3D); IPR001650 (PFAM); IPR011545 (PFAM); mobidb-lite (MOBIDB_LITE); mobidb-lite (MOBIDB_LITE); mobidb-lite (MOBIDB_LITE); PTHR24031 (PANTHER); PTHR24031:SF637 (PANTHER); IPR014014 (PROSITE_PROFILES); IPR001650 (PROSITE_PROFILES); IPR014001 (PROSITE_PROFILES); cd18787 (CDD); cd17947 (CDD); IPR027417 (SUPERFAMILY)	F:GO:0003676; F:GO:0005524	F:nucleic acid binding; F:ATP binding
TRINITY_DN1000_c1_g1_i4	RNA helicase 36	1.89939e-86	4	F:GO:0003723; F:GO:0003724; F:GO:0005524; C:GO:0005730	F:RNA binding; F:RNA helicase activity; F:ATP binding; C:nucleolus	EC:3.6.1.3; EC:3.6.4.13; EC:3.6.1.15	Adenosinetriphosphatase; RNA helicase; Nucleoside-triphosphate phosphatase	mobidb-lite (MOBIDB_LITE); mobidb-lite (MOBIDB_LITE); mobidb-lite (MOBIDB_LITE); mobidb-lite (MOBIDB_LITE)	no GO terms	no GO terms
TRINITY_DN1000_c1_g1_i5	DEA(D/H)-box RNA helicase family protein	0	5	P:GO:0009553; F:GO:0003723; F:GO:0003724; F:GO:0005524; C:GO:0005730	P:embryo sac development; F:RNA binding; F:RNA helicase activity; F:ATP binding; C:nucleolus	EC:3.6.1.3; EC:3.6.4.13; EC:3.6.1.15	Adenosinetriphosphatase; RNA helicase; Nucleoside-triphosphate phosphatase	G3DSA:3.40.50.300 (GENE3D); G3DSA:3.40.50.300 (GENE3D); IPR001650 (PFAM); IPR011545 (PFAM); mobidb-lite (MOBIDB_LITE); mobidb-lite (MOBIDB_LITE); mobidb-lite (MOBIDB_LITE); PTHR24031 (PANTHER); PTHR24031:SF637 (PANTHER); IPR014014 (PROSITE_PROFILES); IPR001650 (PROSITE_PROFILES); IPR014001 (PROSITE_PROFILES); cd18787 (CDD); cd17947 (CDD); IPR027417 (SUPERFAMILY)	F:GO:0003676; F:GO:0005524	F:nucleic acid binding; F:ATP binding
TRINITY_DN1000_c1_g1_i6	DEA(D/H)-box RNA helicase family protein	1.0741e-116	3	F:GO:0003676; F:GO:0004386; C:GO:0005634	F:nucleic acid binding; F:helicase activity; C:nucleus	EC:3.6.1.3; EC:3.6.1.15	Adenosinetriphosphatase; Nucleoside-triphosphate phosphatase	G3DSA:3.40.50.300 (GENE3D); mobidb-lite (MOBIDB_LITE); mobidb-lite (MOBIDB_LITE); mobidb-lite (MOBIDB_LITE); mobidb-lite (MOBIDB_LITE); PTHR24031:SF637 (PANTHER); PTHR24031 (PANTHER); IPR014014 (PROSITE_PROFILES); cd17947 (CDD); IPR027417 (SUPERFAMILY)	no GO terms	no GO terms
TRINITY_DN1000_c1_g1_i7	DEA(D/H)-box RNA helicase family protein	4.81287e-131	4	F:GO:0000166; F:GO:0003723; F:GO:0003724; C:GO:0005730	F:nucleotide binding; F:RNA binding; F:RNA helicase activity; C:nucleolus	EC:3.6.1.3; EC:3.6.4.13; EC:3.6.1.15	Adenosinetriphosphatase; RNA helicase; Nucleoside-triphosphate phosphatase	IPR001650 (PFAM); G3DSA:3.40.50.300 (GENE3D); PTHR24031 (PANTHER); PTHR24031:SF637 (PANTHER); cd18787 (CDD); cd17947 (CDD); IPR027417 (SUPERFAMILY)	no GO terms	no GO terms
TRINITY_DN1000_c1_g1_i8	DEA(D/H)-box RNA helicase family protein	6.14144e-82	4	F:GO:0000166; F:GO:0003723; F:GO:0003724; C:GO:0005730	F:nucleotide binding; F:RNA binding; F:RNA helicase activity; C:nucleolus	EC:3.6.1.3; EC:3.6.4.13; EC:3.6.1.15	Adenosinetriphosphatase; RNA helicase; Nucleoside-triphosphate phosphatase	G3DSA:3.40.50.300 (GENE3D); mobidb-lite (MOBIDB_LITE); mobidb-lite (MOBIDB_LITE); mobidb-lite (MOBIDB_LITE); mobidb-lite (MOBIDB_LITE); PTHR24031:SF637 (PANTHER); PTHR24031 (PANTHER); IPR014014 (PROSITE_PROFILES); cd17947 (CDD); IPR027417 (SUPERFAMILY)	no GO terms	no GO terms
TRINITY_DN1000_c1_g1_i9	DEA(D/H)-box RNA helicase family protein	1.7293e-19	4	F:GO:0003723; F:GO:0003724; F:GO:0005524; C:GO:0005730	F:RNA binding; F:RNA helicase activity; F:ATP binding; C:nucleolus	EC:3.6.1.3; EC:3.6.4.13; EC:3.6.1.15	Adenosinetriphosphatase; RNA helicase; Nucleoside-triphosphate phosphatase	no IPS match	no IPS match	no IPS match
TRINITY_DN1000_c2_g1_i1	modifier of snc1	1.44728e-21	2	P:GO:0006325; P:GO:0040029	P:chromatin organization; P:regulation of gene expression, epigenetic			no IPS match	no IPS match	no IPS match
TRINITY_DN1000_c2_g1_i2	modifier of snc1	3.36876e-21	2	P:GO:0006325; P:GO:0040029	P:chromatin organization; P:regulation of gene expression, epigenetic			no IPS match	no IPS match	no IPS match
TRINITY_DN10000_c0_g1_i1	calcium-dependent protein kinase 33	9.34162e-38	10	P:GO:0018105; P:GO:0035556; P:GO:0046777; F:GO:0005509; F:GO:0005516; F:GO:0005524; F:GO:0009931; C:GO:0005634; C:GO:0005737; C:GO:0005886	P:peptidyl-serine phosphorylation; P:intracellular signal transduction; P:protein autophosphorylation; F:calcium ion binding; F:calmodulin binding; F:ATP binding; F:calcium-dependent protein serine/threonine kinase activity; C:nucleus; C:cytoplasm; C:plasma membrane			IPR000719 (PFAM); G3DSA:1.10.510.10 (GENE3D); PTHR24349 (PANTHER); PTHR24349:SF174 (PANTHER); IPR000719 (PROSITE_PROFILES); IPR011009 (SUPERFAMILY)	P:GO:0006468; F:GO:0004672; F:GO:0005524	P:protein phosphorylation; F:protein kinase activity; F:ATP binding
TRINITY_DN10002_c0_g1_i1	putative WRKY-type DNA binding protein	2.04512e-60	12	P:GO:0006355; P:GO:0009555; P:GO:0009567; P:GO:0010197; F:GO:0000976; F:GO:0003700; F:GO:0003723; F:GO:0003735; F:GO:0005515; F:GO:0043565; C:GO:0005634; C:GO:0005739	P:regulation of transcription, DNA-templated; P:pollen development; P:double fertilization forming a zygote and endosperm; P:polar nucleus fusion; F:transcription regulatory region sequence-specific DNA binding; F:DNA-binding transcription factor activity; F:RNA binding; F:structural constituent of ribosome; F:protein binding; F:sequence-specific DNA binding; C:nucleus; C:mitochondrion			mobidb-lite (MOBIDB_LITE); mobidb-lite (MOBIDB_LITE); mobidb-lite (MOBIDB_LITE); PTHR31221:SF150 (PANTHER); PTHR31221 (PANTHER)	no GO terms	no GO terms
TRINITY_DN10003_c0_g1_i1	probable glutamyl endopeptidase, chloroplastic isoform X1	1.94082e-43	3	P:GO:0006508; F:GO:0004252; C:GO:0009507	P:proteolysis; F:serine-type endopeptidase activity; C:chloroplast	EC:3.4.21	Acting on peptide bonds (peptidases)	PTHR42776:SF19 (PANTHER); PTHR42776 (PANTHER)	no GO terms	no GO terms
TRINITY_DN10003_c0_g1_i2	probable glutamyl endopeptidase, chloroplastic isoform X1	3.06446e-42	3	P:GO:0006508; F:GO:0004252; C:GO:0009507	P:proteolysis; F:serine-type endopeptidase activity; C:chloroplast	EC:3.4.21	Acting on peptide bonds (peptidases)	PTHR42776:SF19 (PANTHER); PTHR42776 (PANTHER)	no GO terms	no GO terms
TRINITY_DN10004_c0_g1_i1	Quinoprotein amine dehydrogenase, beta chain-like; RIC1-like guanyl-nucleotide exchange factor	2.39004e-83	6	P:GO:0006886; P:GO:0042147; F:GO:0017112; C:GO:0000139; C:GO:0005829; C:GO:0034066	P:intracellular protein transport; P:retrograde transport, endosome to Golgi; F:Rab guanyl-nucleotide exchange factor activity; C:Golgi membrane; C:cytosol; C:RIC1-RGP1 guanyl-nucleotide exchange factor complex			IPR009771 (PFAM); IPR040096 (PANTHER)	P:GO:0006886; C:GO:0034066	P:intracellular protein transport; C:RIC1-RGP1 guanyl-nucleotide exchange factor complex
TRINITY_DN10005_c0_g1_i1	S-adenosyl-L-methionine-dependent methyltransferases superfamily protein	5.62221e-169	10	P:GO:0006417; P:GO:0009651; P:GO:0009873; P:GO:0032259; P:GO:0045892; F:GO:0008168; C:GO:0005634; C:GO:0005794; C:GO:0005829; C:GO:0016021	P:regulation of translation; P:response to salt stress; P:ethylene-activated signaling pathway; P:methylation; P:negative regulation of transcription, DNA-templated; F:methyltransferase activity; C:nucleus; C:Golgi apparatus; C:cytosol; C:integral component of membrane			IPR013216 (PFAM); G3DSA:3.40.50.150 (GENE3D); PTHR45085 (PANTHER); PTHR45085:SF2 (PANTHER); cd02440 (CDD); IPR029063 (SUPERFAMILY)	F:GO:0008168	F:methyltransferase activity
TRINITY_DN10006_c0_g1_i1	Peroxisomal membrane 22 kDa (Mpv17/PMP22) family protein	0	2	C:GO:0005737; C:GO:0016021	C:cytoplasm; C:integral component of membrane			IPR007248 (PFAM); IPR007248 (PANTHER); PTHR11266:SF76 (PANTHER)	C:GO:0016021	C:integral component of membrane
TRINITY_DN10006_c0_g1_i2	peroxisomal membrane-like protein	0	2	C:GO:0005737; C:GO:0016021	C:cytoplasm; C:integral component of membrane			PTHR11266:SF76 (PANTHER); IPR007248 (PANTHER)	C:GO:0016021	C:integral component of membrane
TRINITY_DN10006_c0_g1_i3	peroxisomal membrane-like protein	0	2	C:GO:0005737; C:GO:0016021	C:cytoplasm; C:integral component of membrane			IPR007248 (PANTHER); PTHR11266:SF76 (PANTHER)	C:GO:0016021	C:integral component of membrane
TRINITY_DN10006_c0_g2_i1	mpv17-like protein isoform X1	1.0598e-07	2	C:GO:0005737; C:GO:0016021	C:cytoplasm; C:integral component of membrane			no IPS match	no IPS match	no IPS match
TRINITY_DN10006_c1_g1_i1	---NA---							no IPS match	no IPS match	no IPS match
TRINITY_DN10007_c0_g1_i1	branched-chain amino acid transaminase 2	9.09747e-51	9	P:GO:0009097; P:GO:0009098; P:GO:0009099; P:GO:0071669; F:GO:0052654; F:GO:0052655; F:GO:0052656; C:GO:0005829; C:GO:0009570	P:isoleucine biosynthetic process; P:leucine biosynthetic process; P:valine biosynthetic process; P:plant-type cell wall organization or biogenesis; F:L-leucine transaminase activity; F:L-valine transaminase activity; F:L-isoleucine transaminase activity; C:cytosol; C:chloroplast stroma	EC:2.6.1.42	Branched-chain-amino-acid transaminase	IPR043132 (G3DSA:3.20.10.GENE3D); IPR001544 (PFAM); PTHR42825:SF5 (PANTHER); PTHR42825 (PANTHER); IPR036038 (SUPERFAMILY)	F:GO:0003824	F:catalytic activity
TRINITY_DN10007_c1_g1_i1	branched-chain amino acid transaminase 2	1.29057e-11	9	P:GO:0009097; P:GO:0009098; P:GO:0009099; P:GO:0071669; F:GO:0052654; F:GO:0052655; F:GO:0052656; C:GO:0005829; C:GO:0009507	P:isoleucine biosynthetic process; P:leucine biosynthetic process; P:valine biosynthetic process; P:plant-type cell wall organization or biogenesis; F:L-leucine transaminase activity; F:L-valine transaminase activity; F:L-isoleucine transaminase activity; C:cytosol; C:chloroplast	EC:2.6.1.42	Branched-chain-amino-acid transaminase	no IPS match	no IPS match	no IPS match
TRINITY_DN10008_c0_g1_i1	Pyruvate kinase family protein	2.89446e-50	8	P:GO:0006096; P:GO:0046686; F:GO:0000287; F:GO:0004743; F:GO:0016301; F:GO:0030955; C:GO:0005829; C:GO:0005886	P:glycolytic process; P:response to cadmium ion; F:magnesium ion binding; F:pyruvate kinase activity; F:kinase activity; F:potassium ion binding; C:cytosol; C:plasma membrane	EC:2.7.1.40	Pyruvate kinase	IPR015793 (PFAM); IPR015806 (G3DSA:2.40.33.GENE3D); IPR001697 (PANTHER); PTHR11817:SF79 (PANTHER); IPR011037 (SUPERFAMILY)	P:GO:0006096; F:GO:0000287; F:GO:0004743; F:GO:0030955	P:glycolytic process; F:magnesium ion binding; F:pyruvate kinase activity; F:potassium ion binding
TRINITY_DN10009_c0_g1_i1	uncharacterized protein At4g26450-like	7.55868e-170	2	F:GO:0005515; C:GO:0005635	F:protein binding; C:nuclear envelope			mobidb-lite (MOBIDB_LITE); IPR040276 (PANTHER); PTHR36056:SF1 (PANTHER)	no GO terms	no GO terms
TRINITY_DN10009_c0_g2_i1	Uncharacterized protein TCM_030506 isoform 1	0	1	C:GO:0005634	C:nucleus			mobidb-lite (MOBIDB_LITE); mobidb-lite (MOBIDB_LITE); mobidb-lite (MOBIDB_LITE); mobidb-lite (MOBIDB_LITE); mobidb-lite (MOBIDB_LITE); PTHR36056:SF1 (PANTHER); IPR040276 (PANTHER)	no GO terms	no GO terms
TRINITY_DN1001_c0_g1_i1	Protein kinase superfamily protein	0	11	P:GO:0006952; P:GO:0007178; P:GO:0009737; P:GO:0018108; F:GO:0004675; F:GO:0004715; F:GO:0005524; F:GO:0019901; C:GO:0005886; C:GO:0009506; C:GO:0016021	P:defense response; P:transmembrane receptor protein serine/threonine kinase signaling pathway; P:response to abscisic acid; P:peptidyl-tyrosine phosphorylation; F:transmembrane receptor protein serine/threonine kinase activity; F:non-membrane spanning protein tyrosine kinase activity; F:ATP binding; F:protein kinase binding; C:plasma membrane; C:plasmodesma; C:integral component of membrane	EC:2.7.10; EC:2.7.10.2; EC:2.7.11.30	Transferring phosphorus-containing groups; Non-specific protein-tyrosine kinase; Receptor protein serine/threonine kinase	IPR001245 (PFAM); PIRSF000654 (PIRSF); G3DSA:3.30.200.20 (GENE3D); G3DSA:1.10.510.10 (GENE3D); mobidb-lite (MOBIDB_LITE); PTHR27001:SF804 (PANTHER); PTHR27001 (PANTHER); IPR000719 (PROSITE_PROFILES); IPR011009 (SUPERFAMILY)	P:GO:0006468; F:GO:0004672; F:GO:0005524	P:protein phosphorylation; F:protein kinase activity; F:ATP binding
TRINITY_DN1001_c0_g1_i2	Protein kinase superfamily protein	0	11	P:GO:0006952; P:GO:0007178; P:GO:0009737; P:GO:0018108; F:GO:0004675; F:GO:0004715; F:GO:0005524; F:GO:0019901; C:GO:0005886; C:GO:0009506; C:GO:0016021	P:defense response; P:transmembrane receptor protein serine/threonine kinase signaling pathway; P:response to abscisic acid; P:peptidyl-tyrosine phosphorylation; F:transmembrane receptor protein serine/threonine kinase activity; F:non-membrane spanning protein tyrosine kinase activity; F:ATP binding; F:protein kinase binding; C:plasma membrane; C:plasmodesma; C:integral component of membrane	EC:2.7.10; EC:2.7.10.2; EC:2.7.11.30	Transferring phosphorus-containing groups; Non-specific protein-tyrosine kinase; Receptor protein serine/threonine kinase	G3DSA:3.30.200.20 (GENE3D); G3DSA:1.10.510.10 (GENE3D); IPR001245 (PFAM); PIRSF000654 (PIRSF); PTHR27001:SF804 (PANTHER); PTHR27001 (PANTHER); IPR000719 (PROSITE_PROFILES); IPR011009 (SUPERFAMILY)	P:GO:0006468; F:GO:0004672; F:GO:0005524	P:protein phosphorylation; F:protein kinase activity; F:ATP binding
TRINITY_DN1001_c0_g1_i3	Protein kinase superfamily protein	0	11	P:GO:0006952; P:GO:0007178; P:GO:0009737; P:GO:0018108; F:GO:0004675; F:GO:0004715; F:GO:0005524; F:GO:0019901; C:GO:0005886; C:GO:0009506; C:GO:0016021	P:defense response; P:transmembrane receptor protein serine/threonine kinase signaling pathway; P:response to abscisic acid; P:peptidyl-tyrosine phosphorylation; F:transmembrane receptor protein serine/threonine kinase activity; F:non-membrane spanning protein tyrosine kinase activity; F:ATP binding; F:protein kinase binding; C:plasma membrane; C:plasmodesma; C:integral component of membrane	EC:2.7.10; EC:2.7.10.2; EC:2.7.11.30	Transferring phosphorus-containing groups; Non-specific protein-tyrosine kinase; Receptor protein serine/threonine kinase	G3DSA:3.30.200.20 (GENE3D); PIRSF000654 (PIRSF); IPR001245 (PFAM); G3DSA:1.10.510.10 (GENE3D); PTHR27001:SF804 (PANTHER); PTHR27001 (PANTHER); IPR000719 (PROSITE_PROFILES); IPR011009 (SUPERFAMILY)	P:GO:0006468; F:GO:0004672; F:GO:0005524	P:protein phosphorylation; F:protein kinase activity; F:ATP binding
TRINITY_DN1001_c0_g1_i4	---NA---							no IPS match	no IPS match	no IPS match
TRINITY_DN1001_c0_g1_i5	Protein kinase superfamily protein	0	11	P:GO:0006952; P:GO:0007178; P:GO:0009737; P:GO:0018108; F:GO:0004675; F:GO:0004715; F:GO:0005524; F:GO:0019901; C:GO:0005886; C:GO:0009506; C:GO:0016021	P:defense response; P:transmembrane receptor protein serine/threonine kinase signaling pathway; P:response to abscisic acid; P:peptidyl-tyrosine phosphorylation; F:transmembrane receptor protein serine/threonine kinase activity; F:non-membrane spanning protein tyrosine kinase activity; F:ATP binding; F:protein kinase binding; C:plasma membrane; C:plasmodesma; C:integral component of membrane	EC:2.7.10; EC:2.7.10.2; EC:2.7.11.30	Transferring phosphorus-containing groups; Non-specific protein-tyrosine kinase; Receptor protein serine/threonine kinase	G3DSA:3.30.200.20 (GENE3D); PIRSF000654 (PIRSF); IPR001245 (PFAM); G3DSA:1.10.510.10 (GENE3D); PTHR27001:SF804 (PANTHER); PTHR27001 (PANTHER); IPR000719 (PROSITE_PROFILES); IPR011009 (SUPERFAMILY)	P:GO:0006468; F:GO:0004672; F:GO:0005524	P:protein phosphorylation; F:protein kinase activity; F:ATP binding
TRINITY_DN1001_c0_g2_i1	protein STRUBBELIG-RECEPTOR FAMILY 3-like isoform X2	0	9	P:GO:0006468; P:GO:0007178; P:GO:0007623; F:GO:0004675; F:GO:0005515; F:GO:0005524; C:GO:0005886; C:GO:0009506; C:GO:0016021	P:protein phosphorylation; P:transmembrane receptor protein serine/threonine kinase signaling pathway; P:circadian rhythm; F:transmembrane receptor protein serine/threonine kinase activity; F:protein binding; F:ATP binding; C:plasma membrane; C:plasmodesma; C:integral component of membrane	EC:2.7.11.30	Receptor protein serine/threonine kinase	IPR032675 (G3DSA:3.80.10.GENE3D); IPR001245 (PFAM); IPR001611 (PFAM); G3DSA:1.10.510.10 (GENE3D); G3DSA:3.30.200.20 (GENE3D); mobidb-lite (MOBIDB_LITE); mobidb-lite (MOBIDB_LITE); mobidb-lite (MOBIDB_LITE); mobidb-lite (MOBIDB_LITE); mobidb-lite (MOBIDB_LITE); PTHR27001:SF773 (PANTHER); PTHR27001 (PANTHER); IPR000719 (PROSITE_PROFILES); SSF52058 (SUPERFAMILY); IPR011009 (SUPERFAMILY); SSF101447 (…	P:GO:0006468; F:GO:0004672; F:GO:0005515; F:GO:0005524	P:protein phosphorylation; F:protein kinase activity; F:protein binding; F:ATP binding
TRINITY_DN1001_c0_g2_i2	protein STRUBBELIG-RECEPTOR FAMILY 3-like isoform X2	0	9	P:GO:0006468; P:GO:0007178; P:GO:0007623; F:GO:0004675; F:GO:0005515; F:GO:0005524; C:GO:0005886; C:GO:0009506; C:GO:0016021	P:protein phosphorylation; P:transmembrane receptor protein serine/threonine kinase signaling pathway; P:circadian rhythm; F:transmembrane receptor protein serine/threonine kinase activity; F:protein binding; F:ATP binding; C:plasma membrane; C:plasmodesma; C:integral component of membrane	EC:2.7.11.30	Receptor protein serine/threonine kinase	IPR013210 (PFAM); IPR001611 (PFAM); IPR001245 (PFAM); G3DSA:1.10.510.10 (GENE3D); G3DSA:3.30.200.20 (GENE3D); IPR032675 (G3DSA:3.80.10.GENE3D); mobidb-lite (MOBIDB_LITE); mobidb-lite (MOBIDB_LITE); mobidb-lite (MOBIDB_LITE); mobidb-lite (MOBIDB_LITE); mobidb-lite (MOBIDB_LITE); PTHR27001 (PANTHER); PTHR27001:SF773 (PANTHER); IPR000719 (PROSITE_PROFILES); SSF101447 (SUPERFAMILY); SSF52058 (SUPERFA…	P:GO:0006468; F:GO:0004672; F:GO:0005515; F:GO:0005524	P:protein phosphorylation; F:protein kinase activity; F:protein binding; F:ATP binding
TRINITY_DN1001_c2_g1_i1	pyrophosphate--fructose 6-phosphate 1-phosphotransferase subunit alpha isoform X1	0.000196248						no IPS match	no IPS match	no IPS match
TRINITY_DN10010_c0_g1_i1	Sec14p-like phosphatidylinositol transfer family protein	7.59255e-76	1	C:GO:0005634	C:nucleus			IPR036865 (G3DSA:3.40.525.GENE3D); IPR011074 (PFAM); PTHR46226 (PANTHER); IPR036273 (SUPERFAMILY)	no GO terms	no GO terms
TRINITY_DN10010_c0_g2_i1	Sec14p-like phosphatidylinositol transfer family protein	1.39871e-23	1	C:GO:0005634	C:nucleus			no IPS match	no IPS match	no IPS match
TRINITY_DN10011_c0_g1_i1	coiled-coil protein	2.61115e-122	4	P:GO:0032456; P:GO:0042147; C:GO:0005829; C:GO:1990745	P:endocytic recycling; P:retrograde transport, endosome to Golgi; C:cytosol; C:EARP complex			IPR019515 (PFAM); PTHR13258:SF0 (PANTHER); IPR040047 (PANTHER)	P:GO:0032456; P:GO:0042147; C:GO:1990745	P:endocytic recycling; P:retrograde transport, endosome to Golgi; C:EARP complex
TRINITY_DN10012_c0_g1_i1	Tudor/PWWP/MBT superfamily protein isoform 1	4.14018e-63						mobidb-lite (MOBIDB_LITE); mobidb-lite (MOBIDB_LITE)	no GO terms	no GO terms
TRINITY_DN10012_c0_g1_i2	Tudor/PWWP/MBT superfamily protein isoform 1	1.30679e-63						mobidb-lite (MOBIDB_LITE)	no GO terms	no GO terms
TRINITY_DN10012_c0_g1_i3	Tudor/PWWP/MBT superfamily protein isoform 1	2.02574e-67						mobidb-lite (MOBIDB_LITE); mobidb-lite (MOBIDB_LITE); mobidb-lite (MOBIDB_LITE)	no GO terms	no GO terms
TRINITY_DN10013_c0_g1_i1	pentatricopeptide repeat-containing protein At2g01510, mitochondrial-like isoform X1	0	3	P:GO:0009451; F:GO:0005515; C:GO:0043231	P:RNA modification; F:protein binding; C:intracellular membrane-bounded organelle			IPR002885 (PFAM); IPR011990 (G3DSA:1.25.40.GENE3D); IPR011990 (G3DSA:1.25.40.GENE3D); IPR002885 (TIGRFAM); IPR011990 (G3DSA:1.25.40.GENE3D); IPR002885 (PFAM); PTHR24015 (PANTHER); IPR002885 (PROSITE_PROFILES); IPR002885 (PROSITE_PROFILES); IPR002885 (PROSITE_PROFILES); IPR002885 (PROSITE_PROFILES); IPR002885 (PROSITE_PROFILES); IPR002885 (PROSITE_PROFILES); IPR002885 (PROSITE_PROFILES); IPR002885…	F:GO:0005515	F:protein binding
TRINITY_DN10013_c0_g1_i3	pentatricopeptide repeat-containing protein At2g01510, mitochondrial-like isoform X1	0	3	P:GO:0009451; F:GO:0005515; C:GO:0043231	P:RNA modification; F:protein binding; C:intracellular membrane-bounded organelle			IPR002885 (PFAM); IPR002885 (PFAM); IPR011990 (G3DSA:1.25.40.GENE3D); PTHR24015 (PANTHER); IPR002885 (PROSITE_PROFILES); IPR002885 (PROSITE_PROFILES); IPR002885 (PROSITE_PROFILES); IPR002885 (PROSITE_PROFILES); IPR002885 (PROSITE_PROFILES); IPR002885 (PROSITE_PROFILES)	F:GO:0005515	F:protein binding
TRINITY_DN10013_c0_g1_i4	pentatricopeptide repeat-containing protein At2g01510, mitochondrial-like isoform X1	0	3	P:GO:0009451; F:GO:0005515; C:GO:0043231	P:RNA modification; F:protein binding; C:intracellular membrane-bounded organelle			IPR011990 (G3DSA:1.25.40.GENE3D); IPR002885 (TIGRFAM); IPR002885 (PFAM); IPR011990 (G3DSA:1.25.40.GENE3D); IPR011990 (G3DSA:1.25.40.GENE3D); IPR002885 (PFAM); PTHR24015 (PANTHER); IPR002885 (PROSITE_PROFILES); IPR002885 (PROSITE_PROFILES); IPR002885 (PROSITE_PROFILES); IPR002885 (PROSITE_PROFILES); IPR002885 (PROSITE_PROFILES); IPR002885 (PROSITE_PROFILES); IPR002885 (PROSITE_PROFILES); IPR002885…	F:GO:0005515	F:protein binding
TRINITY_DN10014_c0_g1_i1	RAB GTPASE HOMOLOG B18	3.52371e-147	9	P:GO:0006886; P:GO:0032482; F:GO:0003924; F:GO:0005525; F:GO:0030742; F:GO:0080115; C:GO:0005777; C:GO:0005794; C:GO:0005886	P:intracellular protein transport; P:Rab protein signal transduction; F:GTPase activity; F:GTP binding; F:GTP-dependent protein binding; F:myosin XI tail binding; C:peroxisome; C:Golgi apparatus; C:plasma membrane	EC:3.6.1.15	Nucleoside-triphosphate phosphatase	PR00449 (PRINTS); IPR001806 (PFAM); G3DSA:3.40.50.300 (GENE3D); IPR005225 (TIGRFAM); PTHR24073:SF1064 (PANTHER); PTHR24073 (PANTHER); PS51419 (PROSITE_PROFILES); cd01863 (CDD); IPR027417 (SUPERFAMILY)	F:GO:0003924; F:GO:0005525	F:GTPase activity; F:GTP binding
TRINITY_DN10014_c0_g1_i2	RAB GTPASE HOMOLOG B18	6.34351e-98	9	P:GO:0006886; P:GO:0032482; F:GO:0003924; F:GO:0005525; F:GO:0030742; F:GO:0080115; C:GO:0005777; C:GO:0005794; C:GO:0005886	P:intracellular protein transport; P:Rab protein signal transduction; F:GTPase activity; F:GTP binding; F:GTP-dependent protein binding; F:myosin XI tail binding; C:peroxisome; C:Golgi apparatus; C:plasma membrane	EC:3.6.1.15	Nucleoside-triphosphate phosphatase	PR00449 (PRINTS); G3DSA:3.40.50.300 (GENE3D); IPR001806 (PFAM); IPR005225 (TIGRFAM); PTHR24073:SF1064 (PANTHER); PTHR24073 (PANTHER); PS51419 (PROSITE_PROFILES); IPR027417 (SUPERFAMILY)	F:GO:0003924; F:GO:0005525	F:GTPase activity; F:GTP binding
TRINITY_DN10014_c0_g1_i3	RAB GTPASE HOMOLOG B18	6.0217e-37	9	P:GO:0006886; P:GO:0032482; F:GO:0003924; F:GO:0005525; F:GO:0030742; F:GO:0080115; C:GO:0005777; C:GO:0005794; C:GO:0005886	P:intracellular protein transport; P:Rab protein signal transduction; F:GTPase activity; F:GTP binding; F:GTP-dependent protein binding; F:myosin XI tail binding; C:peroxisome; C:Golgi apparatus; C:plasma membrane	EC:3.6.1.15	Nucleoside-triphosphate phosphatase	PR00449 (PRINTS); IPR005225 (TIGRFAM); IPR001806 (PFAM); G3DSA:3.40.50.300 (GENE3D); PTHR24073:SF1000 (PANTHER); PTHR24073 (PANTHER); PS51419 (PROSITE_PROFILES); IPR027417 (SUPERFAMILY)	F:GO:0003924; F:GO:0005525	F:GTPase activity; F:GTP binding
TRINITY_DN10014_c0_g1_i4	RAB GTPASE HOMOLOG B18	1.18873e-130	9	P:GO:0006886; P:GO:0032482; F:GO:0003924; F:GO:0005525; F:GO:0030742; F:GO:0080115; C:GO:0005777; C:GO:0005794; C:GO:0005886	P:intracellular protein transport; P:Rab protein signal transduction; F:GTPase activity; F:GTP binding; F:GTP-dependent protein binding; F:myosin XI tail binding; C:peroxisome; C:Golgi apparatus; C:plasma membrane	EC:3.6.1.15	Nucleoside-triphosphate phosphatase	PR00449 (PRINTS); IPR001806 (PFAM); IPR005225 (TIGRFAM); G3DSA:3.40.50.300 (GENE3D); PTHR24073:SF1064 (PANTHER); PTHR24073 (PANTHER); PS51419 (PROSITE_PROFILES); IPR027417 (SUPERFAMILY)	F:GO:0003924; F:GO:0005525	F:GTPase activity; F:GTP binding
TRINITY_DN10014_c0_g2_i1	RAB GTPASE HOMOLOG B18	1.53789e-149	9	P:GO:0006886; P:GO:0032482; F:GO:0003924; F:GO:0005525; F:GO:0030742; F:GO:0080115; C:GO:0005777; C:GO:0005794; C:GO:0005886	P:intracellular protein transport; P:Rab protein signal transduction; F:GTPase activity; F:GTP binding; F:GTP-dependent protein binding; F:myosin XI tail binding; C:peroxisome; C:Golgi apparatus; C:plasma membrane	EC:3.6.1.15	Nucleoside-triphosphate phosphatase	PR00449 (PRINTS); G3DSA:3.40.50.300 (GENE3D); IPR001806 (PFAM); IPR005225 (TIGRFAM); PTHR24073:SF1064 (PANTHER); PTHR24073 (PANTHER); PS51419 (PROSITE_PROFILES); cd01863 (CDD); IPR027417 (SUPERFAMILY)	F:GO:0003924; F:GO:0005525	F:GTPase activity; F:GTP binding
TRINITY_DN10014_c1_g1_i1	RAB GTPASE HOMOLOG B18	2.99478e-33	9	P:GO:0006886; P:GO:0032482; F:GO:0003924; F:GO:0005525; F:GO:0030742; F:GO:0080115; C:GO:0005777; C:GO:0005794; C:GO:0005886	P:intracellular protein transport; P:Rab protein signal transduction; F:GTPase activity; F:GTP binding; F:GTP-dependent protein binding; F:myosin XI tail binding; C:peroxisome; C:Golgi apparatus; C:plasma membrane	EC:3.6.1.15	Nucleoside-triphosphate phosphatase	G3DSA:3.40.50.300 (GENE3D); PTHR24073:SF1000 (PANTHER); PTHR24073 (PANTHER)	no GO terms	no GO terms
TRINITY_DN10014_c1_g1_i2	RAB GTPASE HOMOLOG B18	2.29556e-48	5	P:GO:0006886; P:GO:0032482; F:GO:0003924; C:GO:0005794; C:GO:0005886	P:intracellular protein transport; P:Rab protein signal transduction; F:GTPase activity; C:Golgi apparatus; C:plasma membrane	EC:3.6.1.15	Nucleoside-triphosphate phosphatase	G3DSA:3.40.50.300 (GENE3D); PTHR24073:SF1000 (PANTHER); PTHR24073 (PANTHER)	no GO terms	no GO terms
TRINITY_DN10014_c1_g1_i3	RAB GTPASE HOMOLOG B18	3.14454e-33	9	P:GO:0006886; P:GO:0032482; F:GO:0003924; F:GO:0005525; F:GO:0030742; F:GO:0080115; C:GO:0005777; C:GO:0005794; C:GO:0005886	P:intracellular protein transport; P:Rab protein signal transduction; F:GTPase activity; F:GTP binding; F:GTP-dependent protein binding; F:myosin XI tail binding; C:peroxisome; C:Golgi apparatus; C:plasma membrane	EC:3.6.1.15	Nucleoside-triphosphate phosphatase	G3DSA:3.40.50.300 (GENE3D); PTHR24073:SF1000 (PANTHER); PTHR24073 (PANTHER)	no GO terms	no GO terms
TRINITY_DN10015_c0_g1_i1	transcription factor MYB44-like	2.56341e-139	20	P:GO:0006355; P:GO:0009414; P:GO:0009723; P:GO:0009738; P:GO:0009739; P:GO:0010200; P:GO:0010929; P:GO:0019760; P:GO:0042742; P:GO:0046686; P:GO:0048527; P:GO:1900150; P:GO:1901001; P:GO:2000022; P:GO:2000031; F:GO:0000976; F:GO:0003700; F:GO:0005515; F:GO:0043565; C:GO:0005634	P:regulation of transcription, DNA-templated; P:response to water deprivation; P:response to ethylene; P:abscisic acid-activated signaling pathway; P:response to gibberellin; P:response to chitin; P:positive regulation of auxin mediated signaling pathway; P:glucosinolate metabolic process; P:defense response to bacterium; P:response to cadmium ion; P:lateral root development; P:regulation of defe…			PF13921 (PFAM); G3DSA:1.10.10.60 (GENE3D); G3DSA:1.10.10.60 (GENE3D); mobidb-lite (MOBIDB_LITE); mobidb-lite (MOBIDB_LITE); mobidb-lite (MOBIDB_LITE); PTHR45614:SF59 (PANTHER); IPR015495 (PANTHER); IPR017930 (PROSITE_PROFILES); IPR017930 (PROSITE_PROFILES); IPR001005 (CDD); IPR001005 (CDD); IPR009057 (SUPERFAMILY)	F:GO:0003677	F:DNA binding
TRINITY_DN10015_c0_g1_i2	transcription factor MYB44-like	7.47641e-106	20	P:GO:0006355; P:GO:0009414; P:GO:0009723; P:GO:0009738; P:GO:0009739; P:GO:0010200; P:GO:0010929; P:GO:0019760; P:GO:0042742; P:GO:0046686; P:GO:0048527; P:GO:1900150; P:GO:1901001; P:GO:2000022; P:GO:2000031; F:GO:0000976; F:GO:0003700; F:GO:0005515; F:GO:0043565; C:GO:0005634	P:regulation of transcription, DNA-templated; P:response to water deprivation; P:response to ethylene; P:abscisic acid-activated signaling pathway; P:response to gibberellin; P:response to chitin; P:positive regulation of auxin mediated signaling pathway; P:glucosinolate metabolic process; P:defense response to bacterium; P:response to cadmium ion; P:lateral root development; P:regulation of defe…			G3DSA:1.10.10.60 (GENE3D); G3DSA:1.10.10.60 (GENE3D); PF13921 (PFAM); mobidb-lite (MOBIDB_LITE); mobidb-lite (MOBIDB_LITE); PTHR45614:SF59 (PANTHER); IPR015495 (PANTHER); IPR017930 (PROSITE_PROFILES); IPR017930 (PROSITE_PROFILES); IPR001005 (CDD); IPR001005 (CDD); IPR009057 (SUPERFAMILY)	F:GO:0003677	F:DNA binding
TRINITY_DN10016_c0_g1_i1	putative M-type thioredoxin	5.04936e-134	15	P:GO:0006662; P:GO:0009409; P:GO:0009657; P:GO:0042744; P:GO:0045454; P:GO:0055114; F:GO:0005515; F:GO:0008047; F:GO:0015035; F:GO:0016671; F:GO:0047134; C:GO:0005623; C:GO:0009570; C:GO:0010319; C:GO:0048046	P:glycerol ether metabolic process; P:response to cold; P:plastid organization; P:hydrogen peroxide catabolic process; P:cell redox homeostasis; P:oxidation-reduction process; F:protein binding; F:enzyme activator activity; F:protein disulfide oxidoreductase activity; F:oxidoreductase activity, acting on a sulfur group of donors, disulfide as acceptor; F:protein-disulfide reductase activity; C:ob…	EC:1.8.1.8	Protein-disulfide reductase	PR00421 (PRINTS); IPR013766 (PFAM); IPR036249 (G3DSA:3.40.30.GENE3D); IPR005746 (TIGRFAM); PTHR45663 (PANTHER); PTHR45663:SF18 (PANTHER); IPR013766 (PROSITE_PROFILES); cd02947 (CDD); IPR036249 (SUPERFAMILY)	P:GO:0006662; P:GO:0045454; F:GO:0015035	P:glycerol ether metabolic process; P:cell redox homeostasis; F:protein disulfide oxidoreductase activity
TRINITY_DN10017_c0_g1_i1	S-adenosyl-L-methionine-dependent methyltransferases superfamily protein	0	4	P:GO:0070475; F:GO:0003723; F:GO:0008168; C:GO:0005730	P:rRNA base methylation; F:RNA binding; F:methyltransferase activity; C:nucleolus			IPR023267 (PRINTS); G3DSA:3.40.50.150 (GENE3D); IPR001678 (PFAM); PTHR22807 (PANTHER); PTHR22807:SF4 (PANTHER); IPR001678 (PROSITE_PROFILES); cd02440 (CDD); IPR029063 (SUPERFAMILY)	F:GO:0008168	F:methyltransferase activity
TRINITY_DN10017_c0_g1_i2	S-adenosyl-L-methionine-dependent methyltransferases superfamily protein	1.27753e-31	2	P:GO:0070475; C:GO:0005730	P:rRNA base methylation; C:nucleolus			mobidb-lite (MOBIDB_LITE)	no GO terms	no GO terms
TRINITY_DN10017_c1_g1_i1	---NA---							no IPS match	no IPS match	no IPS match
TRINITY_DN10018_c0_g1_i1	---NA---							no IPS match	no IPS match	no IPS match
TRINITY_DN10018_c0_g1_i2	---NA---							no IPS match	no IPS match	no IPS match
TRINITY_DN10019_c0_g1_i1	myb-related protein Myb4	2.27625e-180	18	P:GO:0009414; P:GO:0009651; P:GO:0009723; P:GO:0009733; P:GO:0009739; P:GO:0009751; P:GO:0009753; P:GO:0009909; P:GO:0010200; P:GO:0030154; P:GO:0045893; P:GO:0046686; P:GO:0050826; F:GO:0000976; F:GO:0003700; F:GO:0005515; F:GO:0043565; C:GO:0005634	P:response to water deprivation; P:response to salt stress; P:response to ethylene; P:response to auxin; P:response to gibberellin; P:response to salicylic acid; P:response to jasmonic acid; P:regulation of flower development; P:response to chitin; P:cell differentiation; P:positive regulation of transcription, DNA-templated; P:response to cadmium ion; P:response to freezing; F:transcription regu…			G3DSA:1.10.10.60 (GENE3D); IPR001005 (PFAM); G3DSA:1.10.10.60 (GENE3D); IPR015495 (PANTHER); PTHR10641:SF1215 (PANTHER); IPR017930 (PROSITE_PROFILES); IPR017930 (PROSITE_PROFILES); IPR001005 (CDD); IPR001005 (CDD); IPR009057 (SUPERFAMILY)	F:GO:0003677	F:DNA binding
TRINITY_DN10019_c0_g1_i2	transcription factor MYB15-like	2.38864e-135	16	P:GO:0009414; P:GO:0009651; P:GO:0009723; P:GO:0009733; P:GO:0009751; P:GO:0009753; P:GO:0010200; P:GO:0030154; P:GO:0045893; P:GO:0046686; P:GO:0050826; F:GO:0000976; F:GO:0003700; F:GO:0005515; F:GO:0043565; C:GO:0005634	P:response to water deprivation; P:response to salt stress; P:response to ethylene; P:response to auxin; P:response to salicylic acid; P:response to jasmonic acid; P:response to chitin; P:cell differentiation; P:positive regulation of transcription, DNA-templated; P:response to cadmium ion; P:response to freezing; F:transcription regulatory region sequence-specific DNA binding; F:DNA-binding tran…			no IPS match	no IPS match	no IPS match
TRINITY_DN10019_c0_g1_i3	myb-related protein Myb4	4.07619e-63	18	P:GO:0009414; P:GO:0009651; P:GO:0009723; P:GO:0009733; P:GO:0009739; P:GO:0009751; P:GO:0009753; P:GO:0009909; P:GO:0010200; P:GO:0030154; P:GO:0045893; P:GO:0046686; P:GO:0050826; F:GO:0000976; F:GO:0003700; F:GO:0005515; F:GO:0043565; C:GO:0005634	P:response to water deprivation; P:response to salt stress; P:response to ethylene; P:response to auxin; P:response to gibberellin; P:response to salicylic acid; P:response to jasmonic acid; P:regulation of flower development; P:response to chitin; P:cell differentiation; P:positive regulation of transcription, DNA-templated; P:response to cadmium ion; P:response to freezing; F:transcription regu…			IPR001005 (PFAM); G3DSA:1.10.10.60 (GENE3D); PTHR10641:SF1221 (PANTHER); IPR015495 (PANTHER); IPR017930 (PROSITE_PROFILES); IPR001005 (CDD); IPR009057 (SUPERFAMILY)	F:GO:0003677	F:DNA binding
TRINITY_DN10019_c0_g1_i4	myb-related protein Myb4	8.0016e-109	16	P:GO:0009414; P:GO:0009651; P:GO:0009723; P:GO:0009733; P:GO:0009751; P:GO:0009753; P:GO:0010200; P:GO:0030154; P:GO:0045893; P:GO:0046686; P:GO:0050826; F:GO:0000976; F:GO:0003700; F:GO:0005515; F:GO:0043565; C:GO:0005634	P:response to water deprivation; P:response to salt stress; P:response to ethylene; P:response to auxin; P:response to salicylic acid; P:response to jasmonic acid; P:response to chitin; P:cell differentiation; P:positive regulation of transcription, DNA-templated; P:response to cadmium ion; P:response to freezing; F:transcription regulatory region sequence-specific DNA binding; F:DNA-binding tran…			IPR001005 (PFAM); G3DSA:1.10.10.60 (GENE3D); PTHR10641:SF1171 (PANTHER); IPR015495 (PANTHER); IPR017930 (PROSITE_PROFILES); IPR001005 (CDD); IPR009057 (SUPERFAMILY)	F:GO:0003677	F:DNA binding
TRINITY_DN10019_c0_g1_i5	myb-related protein Myb4	4.06792e-136	16	P:GO:0009414; P:GO:0009651; P:GO:0009723; P:GO:0009733; P:GO:0009751; P:GO:0009753; P:GO:0010200; P:GO:0030154; P:GO:0045893; P:GO:0046686; P:GO:0050826; F:GO:0000976; F:GO:0003700; F:GO:0005515; F:GO:0043565; C:GO:0005634	P:response to water deprivation; P:response to salt stress; P:response to ethylene; P:response to auxin; P:response to salicylic acid; P:response to jasmonic acid; P:response to chitin; P:cell differentiation; P:positive regulation of transcription, DNA-templated; P:response to cadmium ion; P:response to freezing; F:transcription regulatory region sequence-specific DNA binding; F:DNA-binding tran…			no IPS match	no IPS match	no IPS match
TRINITY_DN1002_c0_g1_i1	SWAP (Suppressor-of-White-APricot)/surp domain-containing protein / ubiquitin family protein	0	6	P:GO:0000398; F:GO:0003723; F:GO:0005515; C:GO:0005686; C:GO:0071004; C:GO:0071013	P:mRNA splicing, via spliceosome; F:RNA binding; F:protein binding; C:U2 snRNP; C:U2-type prespliceosome; C:catalytic step 2 spliceosome			PR01217 (PRINTS); IPR035967 (G3DSA:1.10.10.GENE3D); IPR035967 (G3DSA:1.10.10.GENE3D); G3DSA:3.10.20.90 (GENE3D); IPR022030 (PFAM); IPR000626 (PFAM); IPR000061 (PFAM); mobidb-lite (MOBIDB_LITE); mobidb-lite (MOBIDB_LITE); mobidb-lite (MOBIDB_LITE); mobidb-lite (MOBIDB_LITE); mobidb-lite (MOBIDB_LITE); mobidb-lite (MOBIDB_LITE); mobidb-lite (MOBIDB_LITE); mobidb-lite (MOBIDB_LITE); mobidb-lite (MOB…	P:GO:0006396; F:GO:0003723; F:GO:0005515	P:RNA processing; F:RNA binding; F:protein binding
TRINITY_DN1002_c0_g1_i2	SWAP (Suppressor-of-White-APricot)/surp domain-containing protein / ubiquitin family protein	0	6	P:GO:0000398; F:GO:0003723; F:GO:0005515; C:GO:0005686; C:GO:0071004; C:GO:0071013	P:mRNA splicing, via spliceosome; F:RNA binding; F:protein binding; C:U2 snRNP; C:U2-type prespliceosome; C:catalytic step 2 spliceosome			PR01217 (PRINTS); IPR035967 (G3DSA:1.10.10.GENE3D); IPR035967 (G3DSA:1.10.10.GENE3D); G3DSA:3.10.20.90 (GENE3D); IPR022030 (PFAM); IPR000626 (PFAM); IPR000061 (PFAM); mobidb-lite (MOBIDB_LITE); mobidb-lite (MOBIDB_LITE); mobidb-lite (MOBIDB_LITE); mobidb-lite (MOBIDB_LITE); mobidb-lite (MOBIDB_LITE); mobidb-lite (MOBIDB_LITE); mobidb-lite (MOBIDB_LITE); mobidb-lite (MOBIDB_LITE); mobidb-lite (MOB…	P:GO:0006396; F:GO:0003723; F:GO:0005515	P:RNA processing; F:RNA binding; F:protein binding
TRINITY_DN1002_c0_g1_i3	SWAP (Suppressor-of-White-APricot)/surp domain-containing protein	0	5	P:GO:0000398; F:GO:0003723; C:GO:0005686; C:GO:0071004; C:GO:0071013	P:mRNA splicing, via spliceosome; F:RNA binding; C:U2 snRNP; C:U2-type prespliceosome; C:catalytic step 2 spliceosome			IPR022030 (PFAM); IPR035967 (G3DSA:1.10.10.GENE3D); IPR000061 (PFAM); IPR035967 (G3DSA:1.10.10.GENE3D); mobidb-lite (MOBIDB_LITE); mobidb-lite (MOBIDB_LITE); mobidb-lite (MOBIDB_LITE); mobidb-lite (MOBIDB_LITE); mobidb-lite (MOBIDB_LITE); PTHR15316:SF1 (PANTHER); PTHR15316 (PANTHER); IPR000061 (PROSITE_PROFILES); IPR000061 (PROSITE_PROFILES); IPR035967 (SUPERFAMILY); IPR035967 (SUPERFAMILY)	P:GO:0006396; F:GO:0003723	P:RNA processing; F:RNA binding
TRINITY_DN1002_c0_g1_i4	SWAP (Suppressor-of-White-APricot)/surp domain-containing protein / ubiquitin family protein	0	6	P:GO:0000398; F:GO:0003723; F:GO:0005515; C:GO:0005686; C:GO:0071004; C:GO:0071013	P:mRNA splicing, via spliceosome; F:RNA binding; F:protein binding; C:U2 snRNP; C:U2-type prespliceosome; C:catalytic step 2 spliceosome			PR01217 (PRINTS); IPR022030 (PFAM); IPR000061 (PFAM); G3DSA:3.10.20.90 (GENE3D); IPR000626 (PFAM); IPR035967 (G3DSA:1.10.10.GENE3D); IPR035967 (G3DSA:1.10.10.GENE3D); mobidb-lite (MOBIDB_LITE); mobidb-lite (MOBIDB_LITE); mobidb-lite (MOBIDB_LITE); mobidb-lite (MOBIDB_LITE); mobidb-lite (MOBIDB_LITE); mobidb-lite (MOBIDB_LITE); mobidb-lite (MOBIDB_LITE); mobidb-lite (MOBIDB_LITE); mobidb-lite (MOB…	P:GO:0006396; F:GO:0003723; F:GO:0005515	P:RNA processing; F:RNA binding; F:protein binding
TRINITY_DN1002_c0_g1_i5	SWAP (Suppressor-of-White-APricot)/surp domain-containing protein / ubiquitin family protein	0	6	P:GO:0000398; F:GO:0003723; F:GO:0005515; C:GO:0005686; C:GO:0071004; C:GO:0071013	P:mRNA splicing, via spliceosome; F:RNA binding; F:protein binding; C:U2 snRNP; C:U2-type prespliceosome; C:catalytic step 2 spliceosome			PR01217 (PRINTS); IPR022030 (PFAM); G3DSA:3.10.20.90 (GENE3D); IPR000061 (PFAM); IPR035967 (G3DSA:1.10.10.GENE3D); IPR035967 (G3DSA:1.10.10.GENE3D); IPR000626 (PFAM); mobidb-lite (MOBIDB_LITE); mobidb-lite (MOBIDB_LITE); mobidb-lite (MOBIDB_LITE); mobidb-lite (MOBIDB_LITE); mobidb-lite (MOBIDB_LITE); mobidb-lite (MOBIDB_LITE); mobidb-lite (MOBIDB_LITE); mobidb-lite (MOBIDB_LITE); mobidb-lite (MOB…	P:GO:0006396; F:GO:0003723; F:GO:0005515	P:RNA processing; F:RNA binding; F:protein binding
TRINITY_DN1002_c0_g1_i6	SWAP (Suppressor-of-White-APricot)/surp domain-containing protein / ubiquitin family protein	0	6	P:GO:0000398; F:GO:0003723; F:GO:0005515; C:GO:0005686; C:GO:0071004; C:GO:0071013	P:mRNA splicing, via spliceosome; F:RNA binding; F:protein binding; C:U2 snRNP; C:U2-type prespliceosome; C:catalytic step 2 spliceosome			PR01217 (PRINTS); IPR035967 (G3DSA:1.10.10.GENE3D); IPR035967 (G3DSA:1.10.10.GENE3D); G3DSA:3.10.20.90 (GENE3D); IPR022030 (PFAM); IPR000061 (PFAM); IPR000626 (PFAM); mobidb-lite (MOBIDB_LITE); mobidb-lite (MOBIDB_LITE); mobidb-lite (MOBIDB_LITE); mobidb-lite (MOBIDB_LITE); mobidb-lite (MOBIDB_LITE); mobidb-lite (MOBIDB_LITE); mobidb-lite (MOBIDB_LITE); mobidb-lite (MOBIDB_LITE); mobidb-lite (MOB…	P:GO:0006396; F:GO:0003723; F:GO:0005515	P:RNA processing; F:RNA binding; F:protein binding
TRINITY_DN1002_c0_g2_i1	probable WRKY transcription factor 2	0	5	P:GO:0006355; P:GO:0007275; F:GO:0003700; F:GO:0043565; C:GO:0005634	P:regulation of transcription, DNA-templated; P:multicellular organism development; F:DNA-binding transcription factor activity; F:sequence-specific DNA binding; C:nucleus			IPR003657 (PFAM); IPR036576 (G3DSA:2.20.25.GENE3D); mobidb-lite (MOBIDB_LITE); mobidb-lite (MOBIDB_LITE); mobidb-lite (MOBIDB_LITE); mobidb-lite (MOBIDB_LITE); mobidb-lite (MOBIDB_LITE); mobidb-lite (MOBIDB_LITE); mobidb-lite (MOBIDB_LITE); PTHR31221:SF123 (PANTHER); PTHR31221 (PANTHER); IPR003657 (PROSITE_PROFILES); IPR003657 (PROSITE_PROFILES); IPR036576 (SUPERFAMILY); IPR036576 (SUPERFAMILY)	P:GO:0006355; F:GO:0003700; F:GO:0043565	P:regulation of transcription, DNA-templated; F:DNA-binding transcription factor activity; F:sequence-specific DNA binding
TRINITY_DN1002_c0_g2_i2	probable WRKY transcription factor 2	0	5	P:GO:0006355; P:GO:0007275; F:GO:0003700; F:GO:0043565; C:GO:0005634	P:regulation of transcription, DNA-templated; P:multicellular organism development; F:DNA-binding transcription factor activity; F:sequence-specific DNA binding; C:nucleus			IPR003657 (PFAM); IPR036576 (G3DSA:2.20.25.GENE3D); mobidb-lite (MOBIDB_LITE); mobidb-lite (MOBIDB_LITE); mobidb-lite (MOBIDB_LITE); mobidb-lite (MOBIDB_LITE); mobidb-lite (MOBIDB_LITE); mobidb-lite (MOBIDB_LITE); mobidb-lite (MOBIDB_LITE); PTHR31221:SF123 (PANTHER); PTHR31221 (PANTHER); IPR003657 (PROSITE_PROFILES); IPR003657 (PROSITE_PROFILES); IPR036576 (SUPERFAMILY); IPR036576 (SUPERFAMILY)	P:GO:0006355; F:GO:0003700; F:GO:0043565	P:regulation of transcription, DNA-templated; F:DNA-binding transcription factor activity; F:sequence-specific DNA binding
TRINITY_DN1002_c0_g3_i1	Putative endonuclease or glycosyl hydrolase	0	6	P:GO:0006979; P:GO:0010197; P:GO:0010468; P:GO:0090305; F:GO:0004519; C:GO:0005777	P:response to oxidative stress; P:polar nucleus fusion; P:regulation of gene expression; P:nucleic acid phosphodiester bond hydrolysis; F:endonuclease activity; C:peroxisome			IPR041966 (G3DSA:1.10.10.GENE3D); IPR025605 (PFAM); IPR021139 (PFAM); mobidb-lite (MOBIDB_LITE); PTHR14379:SF3 (PANTHER); IPR024768 (PANTHER); IPR025605 (PROSITE_PROFILES); IPR025605 (PROSITE_PROFILES); cd10910 (CDD); cd08824 (CDD); cd08824 (CDD)	P:GO:0010468; C:GO:0005777	P:regulation of gene expression; C:peroxisome
TRINITY_DN1002_c0_g3_i2	Putative endonuclease or glycosyl hydrolase	0	6	P:GO:0006979; P:GO:0010197; P:GO:0010468; P:GO:0090305; F:GO:0004519; C:GO:0005777	P:response to oxidative stress; P:polar nucleus fusion; P:regulation of gene expression; P:nucleic acid phosphodiester bond hydrolysis; F:endonuclease activity; C:peroxisome			IPR025605 (PFAM); IPR041966 (G3DSA:1.10.10.GENE3D); IPR021139 (PFAM); mobidb-lite (MOBIDB_LITE); IPR024768 (PANTHER); PTHR14379:SF3 (PANTHER); IPR025605 (PROSITE_PROFILES); IPR025605 (PROSITE_PROFILES); cd08824 (CDD); cd08824 (CDD); cd10910 (CDD)	P:GO:0010468; C:GO:0005777	P:regulation of gene expression; C:peroxisome
TRINITY_DN1002_c0_g3_i3	Putative endonuclease or glycosyl hydrolase	0	6	P:GO:0006979; P:GO:0010197; P:GO:0010468; P:GO:0090305; F:GO:0004519; C:GO:0005777	P:response to oxidative stress; P:polar nucleus fusion; P:regulation of gene expression; P:nucleic acid phosphodiester bond hydrolysis; F:endonuclease activity; C:peroxisome			IPR021139 (PFAM); IPR041966 (G3DSA:1.10.10.GENE3D); IPR025605 (PFAM); mobidb-lite (MOBIDB_LITE); PTHR14379:SF3 (PANTHER); IPR024768 (PANTHER); IPR025605 (PROSITE_PROFILES); IPR025605 (PROSITE_PROFILES); cd08824 (CDD); cd10910 (CDD); cd08824 (CDD)	P:GO:0010468; C:GO:0005777	P:regulation of gene expression; C:peroxisome
TRINITY_DN1002_c1_g1_i1	NAC domain protein	7.0956e-77	16	P:GO:0008361; P:GO:0009414; P:GO:0009611; P:GO:0009620; P:GO:0009744; P:GO:0009751; P:GO:0009793; P:GO:0009867; P:GO:0010099; P:GO:0010150; P:GO:0045892; P:GO:0045893; F:GO:0003677; F:GO:0003700; F:GO:0043424; C:GO:0005634	P:regulation of cell size; P:response to water deprivation; P:response to wounding; P:response to fungus; P:response to sucrose; P:response to salicylic acid; P:embryo development ending in seed dormancy; P:jasmonic acid mediated signaling pathway; P:regulation of photomorphogenesis; P:leaf senescence; P:negative regulation of transcription, DNA-templated; P:positive regulation of transcription, …			IPR003441 (PFAM); IPR036093 (G3DSA:3.30.310.GENE3D); PTHR31719:SF115 (PANTHER); PTHR31719 (PANTHER); IPR003441 (PROSITE_PROFILES); IPR036093 (SUPERFAMILY)	P:GO:0006355; F:GO:0003677	P:regulation of transcription, DNA-templated; F:DNA binding
TRINITY_DN1002_c1_g1_i2	NAC domain protein	6.21233e-57	16	P:GO:0008361; P:GO:0009414; P:GO:0009611; P:GO:0009620; P:GO:0009744; P:GO:0009751; P:GO:0009753; P:GO:0009793; P:GO:0010099; P:GO:0045892; P:GO:0045893; P:GO:1900057; F:GO:0000976; F:GO:0003700; F:GO:0043424; C:GO:0005634	P:regulation of cell size; P:response to water deprivation; P:response to wounding; P:response to fungus; P:response to sucrose; P:response to salicylic acid; P:response to jasmonic acid; P:embryo development ending in seed dormancy; P:regulation of photomorphogenesis; P:negative regulation of transcription, DNA-templated; P:positive regulation of transcription, DNA-templated; P:positive regulati…			IPR003441 (PFAM); IPR036093 (G3DSA:3.30.310.GENE3D); PTHR31719:SF115 (PANTHER); PTHR31719 (PANTHER); IPR003441 (PROSITE_PROFILES); IPR036093 (SUPERFAMILY)	P:GO:0006355; F:GO:0003677	P:regulation of transcription, DNA-templated; F:DNA binding
TRINITY_DN1002_c1_g1_i3	---NA---							no IPS match	no IPS match	no IPS match
TRINITY_DN1002_c2_g1_i1	pre-mRNA-splicing factor 38 isoform X1	8.64367e-94	3	P:GO:0006397; P:GO:0008380; C:GO:0071011	P:mRNA processing; P:RNA splicing; C:precatalytic spliceosome			IPR005037 (PFAM); PTHR23142:SF1 (PANTHER); IPR005037 (PANTHER)	no GO terms	no GO terms
TRINITY_DN1002_c2_g1_i2	pre-mRNA-splicing factor 38 isoform X1	2.08676e-136	3	P:GO:0006397; P:GO:0008380; C:GO:0071011	P:mRNA processing; P:RNA splicing; C:precatalytic spliceosome			IPR024767 (PFAM); IPR005037 (PFAM); mobidb-lite (MOBIDB_LITE); mobidb-lite (MOBIDB_LITE); mobidb-lite (MOBIDB_LITE); mobidb-lite (MOBIDB_LITE); mobidb-lite (MOBIDB_LITE); mobidb-lite (MOBIDB_LITE); mobidb-lite (MOBIDB_LITE); PTHR23142:SF1 (PANTHER); IPR005037 (PANTHER)	no GO terms	no GO terms
TRINITY_DN1002_c2_g1_i3	pre-mRNA-splicing factor 38 isoform X1	7.57087e-94	3	P:GO:0006397; P:GO:0008380; C:GO:0071011	P:mRNA processing; P:RNA splicing; C:precatalytic spliceosome			IPR005037 (PFAM); PTHR23142:SF1 (PANTHER); IPR005037 (PANTHER)	no GO terms	no GO terms
TRINITY_DN1002_c2_g1_i4	pre-mRNA-splicing factor 38 isoform X1	2.46231e-136	3	P:GO:0006397; P:GO:0008380; C:GO:0071011	P:mRNA processing; P:RNA splicing; C:precatalytic spliceosome			IPR024767 (PFAM); IPR005037 (PFAM); mobidb-lite (MOBIDB_LITE); mobidb-lite (MOBIDB_LITE); mobidb-lite (MOBIDB_LITE); mobidb-lite (MOBIDB_LITE); mobidb-lite (MOBIDB_LITE); mobidb-lite (MOBIDB_LITE); mobidb-lite (MOBIDB_LITE); PTHR23142:SF1 (PANTHER); IPR005037 (PANTHER)	no GO terms	no GO terms
TRINITY_DN1002_c3_g1_i1	probable carboxylesterase 11	6.82694e-17	2	P:GO:0009056; F:GO:0080030	P:catabolic process; F:methyl indole-3-acetate esterase activity	EC:3.1.1.1	Carboxylesterase	no IPS match	no IPS match	no IPS match
TRINITY_DN1002_c3_g2_i1	probable carboxylesterase 11	3.50195e-15	2	P:GO:0009056; F:GO:0080030	P:catabolic process; F:methyl indole-3-acetate esterase activity	EC:3.1.1.1	Carboxylesterase	no IPS match	no IPS match	no IPS match
TRINITY_DN10020_c0_g1_i1	homeobox-leucine zipper protein HAT5	2.20891e-149	9	P:GO:0009637; P:GO:0009651; P:GO:0009965; P:GO:0017148; P:GO:0045893; F:GO:0016740; F:GO:0042803; F:GO:0043565; C:GO:0005634	P:response to blue light; P:response to salt stress; P:leaf morphogenesis; P:negative regulation of translation; P:positive regulation of transcription, DNA-templated; F:transferase activity; F:protein homodimerization activity; F:sequence-specific DNA binding; C:nucleus			IPR000047 (PRINTS); IPR003106 (PFAM); IPR001356 (PFAM); G3DSA:1.10.10.60 (GENE3D); mobidb-lite (MOBIDB_LITE); mobidb-lite (MOBIDB_LITE); PTHR24326:SF557 (PANTHER); PTHR24326 (PANTHER); IPR001356 (PROSITE_PROFILES); IPR001356 (CDD); IPR009057 (SUPERFAMILY)	P:GO:0006355; F:GO:0003677; F:GO:0043565	P:regulation of transcription, DNA-templated; F:DNA binding; F:sequence-specific DNA binding
TRINITY_DN10020_c0_g1_i2	homeobox-leucine zipper protein HAT5	2.66463e-156	9	P:GO:0009637; P:GO:0009651; P:GO:0009965; P:GO:0017148; P:GO:0045893; F:GO:0016740; F:GO:0042803; F:GO:0043565; C:GO:0005634	P:response to blue light; P:response to salt stress; P:leaf morphogenesis; P:negative regulation of translation; P:positive regulation of transcription, DNA-templated; F:transferase activity; F:protein homodimerization activity; F:sequence-specific DNA binding; C:nucleus			IPR000047 (PRINTS); G3DSA:1.10.10.60 (GENE3D); IPR003106 (PFAM); IPR001356 (PFAM); mobidb-lite (MOBIDB_LITE); mobidb-lite (MOBIDB_LITE); PTHR24326:SF557 (PANTHER); PTHR24326 (PANTHER); IPR001356 (PROSITE_PROFILES); IPR001356 (CDD); IPR009057 (SUPERFAMILY)	P:GO:0006355; F:GO:0003677; F:GO:0043565	P:regulation of transcription, DNA-templated; F:DNA binding; F:sequence-specific DNA binding
TRINITY_DN10021_c0_g1_i1	uncharacterized protein LOC111294778	6.38222e-133	1	C:GO:0009536	C:plastid			PTHR35127 (PANTHER)	no GO terms	no GO terms
TRINITY_DN10021_c0_g1_i2	uncharacterized protein LOC111294778	9.22873e-127	1	C:GO:0009536	C:plastid			PTHR35127 (PANTHER)	no GO terms	no GO terms
TRINITY_DN10021_c0_g1_i3	uncharacterized protein LOC111310031	4.53093e-127	1	C:GO:0009536	C:plastid			PTHR35127 (PANTHER)	no GO terms	no GO terms
TRINITY_DN10021_c1_g1_i1	O-fucosyltransferase family protein	1.18787e-60	5	P:GO:0006004; F:GO:0016757; C:GO:0005768; C:GO:0005802; C:GO:0016021	P:fucose metabolic process; F:transferase activity, transferring glycosyl groups; C:endosome; C:trans-Golgi network; C:integral component of membrane			IPR019378 (PFAM); PTHR31818 (PANTHER); PTHR31818:SF1 (PANTHER)	no GO terms	no GO terms
TRINITY_DN10021_c1_g1_i2	O-fucosyltransferase family protein	8.44007e-26	5	P:GO:0006004; F:GO:0016757; C:GO:0005768; C:GO:0005802; C:GO:0016021	P:fucose metabolic process; F:transferase activity, transferring glycosyl groups; C:endosome; C:trans-Golgi network; C:integral component of membrane			PTHR31818:SF1 (PANTHER); PTHR31818 (PANTHER)	no GO terms	no GO terms
TRINITY_DN10021_c1_g2_i2	O-fucosyltransferase family protein	0	5	P:GO:0006004; F:GO:0016757; C:GO:0005768; C:GO:0005802; C:GO:0016021	P:fucose metabolic process; F:transferase activity, transferring glycosyl groups; C:endosome; C:trans-Golgi network; C:integral component of membrane			IPR019378 (PFAM); IPR024709 (PIRSF); mobidb-lite (MOBIDB_LITE); mobidb-lite (MOBIDB_LITE); mobidb-lite (MOBIDB_LITE); PTHR31818:SF17 (PANTHER); PTHR31818 (PANTHER); IPR024709 (CDD)	no GO terms	no GO terms
TRINITY_DN10021_c2_g1_i1	---NA---							no IPS match	no IPS match	no IPS match
TRINITY_DN10021_c3_g1_i1	---NA---							no IPS match	no IPS match	no IPS match
TRINITY_DN10022_c0_g1_i1	histone deacetylase 9	6.22594e-70	17	P:GO:0009294; P:GO:0009405; P:GO:0009861; P:GO:0010187; P:GO:0016573; P:GO:0045892; P:GO:0045944; P:GO:0070933; P:GO:1900055; P:GO:1902459; P:GO:1990619; F:GO:0005515; F:GO:0032041; F:GO:0043565; F:GO:0046872; C:GO:0005737; C:GO:0070822	P:DNA mediated transformation; P:pathogenesis; P:jasmonic acid and ethylene-dependent systemic resistance; P:negative regulation of seed germination; P:histone acetylation; P:negative regulation of transcription, DNA-templated; P:positive regulation of transcription by RNA polymerase II; P:histone H4 deacetylation; P:regulation of leaf senescence; P:positive regulation of stem cell population mai…	EC:3.5.1.98	Histone deacetylase	IPR003084 (PRINTS); IPR000286 (PRINTS); IPR023801 (PFAM); IPR037138 (G3DSA:3.40.800.GENE3D); PTHR10625 (PANTHER); PTHR10625:SF132 (PANTHER); IPR023696 (SUPERFAMILY)	P:GO:0016575; F:GO:0004407	P:histone deacetylation; F:histone deacetylase activity
TRINITY_DN10022_c0_g1_i11	histone deacetylase 9	8.97115e-70	17	P:GO:0009294; P:GO:0009405; P:GO:0009861; P:GO:0010187; P:GO:0016573; P:GO:0045892; P:GO:0045944; P:GO:0070933; P:GO:1900055; P:GO:1902459; P:GO:1990619; F:GO:0005515; F:GO:0032041; F:GO:0043565; F:GO:0046872; C:GO:0005737; C:GO:0070822	P:DNA mediated transformation; P:pathogenesis; P:jasmonic acid and ethylene-dependent systemic resistance; P:negative regulation of seed germination; P:histone acetylation; P:negative regulation of transcription, DNA-templated; P:positive regulation of transcription by RNA polymerase II; P:histone H4 deacetylation; P:regulation of leaf senescence; P:positive regulation of stem cell population mai…	EC:3.5.1.98	Histone deacetylase	IPR003084 (PRINTS); IPR000286 (PRINTS); IPR023801 (PFAM); IPR037138 (G3DSA:3.40.800.GENE3D); PTHR10625 (PANTHER); PTHR10625:SF132 (PANTHER); IPR023696 (SUPERFAMILY)	P:GO:0016575; F:GO:0004407	P:histone deacetylation; F:histone deacetylase activity
TRINITY_DN10022_c0_g1_i12	histone deacetylase 6	6.1292e-16	17	P:GO:0009651; P:GO:0009737; P:GO:0009793; P:GO:0010187; P:GO:0010228; P:GO:0010431; P:GO:0016441; P:GO:0045944; P:GO:0070933; P:GO:1900055; P:GO:1990619; F:GO:0005515; F:GO:0032041; F:GO:0043565; F:GO:0046872; C:GO:0000118; C:GO:0009941	P:response to salt stress; P:response to abscisic acid; P:embryo development ending in seed dormancy; P:negative regulation of seed germination; P:vegetative to reproductive phase transition of meristem; P:seed maturation; P:posttranscriptional gene silencing; P:positive regulation of transcription by RNA polymerase II; P:histone H4 deacetylation; P:regulation of leaf senescence; P:histone H3-K9 …	EC:3.5.1.98	Histone deacetylase	no IPS match	no IPS match	no IPS match
TRINITY_DN10022_c0_g1_i13	histone deacetylase 9	1.17515e-59	17	P:GO:0009294; P:GO:0009405; P:GO:0009861; P:GO:0010187; P:GO:0016573; P:GO:0045892; P:GO:0045944; P:GO:0070933; P:GO:1900055; P:GO:1902459; P:GO:1990619; F:GO:0005515; F:GO:0032041; F:GO:0043565; F:GO:0046872; C:GO:0005737; C:GO:0070822	P:DNA mediated transformation; P:pathogenesis; P:jasmonic acid and ethylene-dependent systemic resistance; P:negative regulation of seed germination; P:histone acetylation; P:negative regulation of transcription, DNA-templated; P:positive regulation of transcription by RNA polymerase II; P:histone H4 deacetylation; P:regulation of leaf senescence; P:positive regulation of stem cell population mai…	EC:3.5.1.98	Histone deacetylase	IPR003084 (PRINTS); IPR000286 (PRINTS); IPR037138 (G3DSA:3.40.800.GENE3D); IPR023801 (PFAM); PTHR10625:SF132 (PANTHER); PTHR10625 (PANTHER); IPR023696 (SUPERFAMILY)	P:GO:0016575; F:GO:0004407	P:histone deacetylation; F:histone deacetylase activity
TRINITY_DN10022_c0_g1_i14	histone deacetylase 9	2.16965e-60	17	P:GO:0009294; P:GO:0009405; P:GO:0009861; P:GO:0010187; P:GO:0016573; P:GO:0045892; P:GO:0045944; P:GO:0070933; P:GO:1900055; P:GO:1902459; P:GO:1990619; F:GO:0005515; F:GO:0032041; F:GO:0043565; F:GO:0046872; C:GO:0005737; C:GO:0070822	P:DNA mediated transformation; P:pathogenesis; P:jasmonic acid and ethylene-dependent systemic resistance; P:negative regulation of seed germination; P:histone acetylation; P:negative regulation of transcription, DNA-templated; P:positive regulation of transcription by RNA polymerase II; P:histone H4 deacetylation; P:regulation of leaf senescence; P:positive regulation of stem cell population mai…	EC:3.5.1.98	Histone deacetylase	IPR003084 (PRINTS); IPR000286 (PRINTS); IPR023801 (PFAM); IPR037138 (G3DSA:3.40.800.GENE3D); PTHR10625 (PANTHER); PTHR10625:SF132 (PANTHER); IPR023696 (SUPERFAMILY)	P:GO:0016575; F:GO:0004407	P:histone deacetylation; F:histone deacetylase activity
TRINITY_DN10022_c0_g1_i16	histone deacetylase 6	8.25296e-21	17	P:GO:0009651; P:GO:0009737; P:GO:0009793; P:GO:0010187; P:GO:0010228; P:GO:0010431; P:GO:0016441; P:GO:0045944; P:GO:0070933; P:GO:1900055; P:GO:1990619; F:GO:0005515; F:GO:0032041; F:GO:0043565; F:GO:0046872; C:GO:0000118; C:GO:0009941	P:response to salt stress; P:response to abscisic acid; P:embryo development ending in seed dormancy; P:negative regulation of seed germination; P:vegetative to reproductive phase transition of meristem; P:seed maturation; P:posttranscriptional gene silencing; P:positive regulation of transcription by RNA polymerase II; P:histone H4 deacetylation; P:regulation of leaf senescence; P:histone H3-K9 …	EC:3.5.1.98	Histone deacetylase	no IPS match	no IPS match	no IPS match
TRINITY_DN10022_c0_g1_i3	histone deacetylase 9	3.38524e-25	11	P:GO:0010187; P:GO:0045944; P:GO:0070933; P:GO:1900055; P:GO:1990619; F:GO:0005515; F:GO:0032041; F:GO:0043565; F:GO:0046872; C:GO:0000118; C:GO:0005737	P:negative regulation of seed germination; P:positive regulation of transcription by RNA polymerase II; P:histone H4 deacetylation; P:regulation of leaf senescence; P:histone H3-K9 deacetylation; F:protein binding; F:NAD-dependent histone deacetylase activity (H3-K14 specific); F:sequence-specific DNA binding; F:metal ion binding; C:histone deacetylase complex; C:cytoplasm	EC:3.5.1.98	Histone deacetylase	no IPS match	no IPS match	no IPS match
TRINITY_DN10022_c0_g1_i4	histone deacetylase	8.0359e-41	17	P:GO:0009294; P:GO:0009405; P:GO:0009861; P:GO:0010187; P:GO:0016573; P:GO:0045892; P:GO:0045944; P:GO:0070933; P:GO:1900055; P:GO:1902459; P:GO:1990619; F:GO:0005515; F:GO:0032041; F:GO:0043565; F:GO:0046872; C:GO:0005737; C:GO:0070822	P:DNA mediated transformation; P:pathogenesis; P:jasmonic acid and ethylene-dependent systemic resistance; P:negative regulation of seed germination; P:histone acetylation; P:negative regulation of transcription, DNA-templated; P:positive regulation of transcription by RNA polymerase II; P:histone H4 deacetylation; P:regulation of leaf senescence; P:positive regulation of stem cell population mai…	EC:3.5.1.98	Histone deacetylase	IPR000286 (PRINTS); IPR003084 (PRINTS); IPR023801 (PFAM); IPR037138 (G3DSA:3.40.800.GENE3D); PTHR10625:SF132 (PANTHER); PTHR10625 (PANTHER); IPR023696 (SUPERFAMILY)	P:GO:0016575; F:GO:0004407	P:histone deacetylation; F:histone deacetylase activity
TRINITY_DN10022_c0_g1_i5	histone deacetylase 6	7.45717e-39	18	P:GO:0009651; P:GO:0009737; P:GO:0009793; P:GO:0010187; P:GO:0010228; P:GO:0010431; P:GO:0016441; P:GO:0045944; P:GO:0070933; P:GO:1900055; P:GO:1990619; F:GO:0005515; F:GO:0032041; F:GO:0043565; F:GO:0046872; C:GO:0000118; C:GO:0005730; C:GO:0009941	P:response to salt stress; P:response to abscisic acid; P:embryo development ending in seed dormancy; P:negative regulation of seed germination; P:vegetative to reproductive phase transition of meristem; P:seed maturation; P:posttranscriptional gene silencing; P:positive regulation of transcription by RNA polymerase II; P:histone H4 deacetylation; P:regulation of leaf senescence; P:histone H3-K9 …	EC:3.5.1.98	Histone deacetylase	IPR037138 (G3DSA:3.40.800.GENE3D); PTHR10625:SF184 (PANTHER); PTHR10625 (PANTHER); IPR023696 (SUPERFAMILY)	no GO terms	no GO terms
TRINITY_DN10022_c0_g1_i6	histone deacetylase 9	3.55541e-11	3	P:GO:0016575; F:GO:0004407; F:GO:0046872	P:histone deacetylation; F:histone deacetylase activity; F:metal ion binding	EC:3.5.1.98	Histone deacetylase	no IPS match	no IPS match	no IPS match
TRINITY_DN10022_c0_g1_i7	histone deacetylase 9	2.05392e-35	17	P:GO:0009294; P:GO:0009405; P:GO:0009861; P:GO:0010187; P:GO:0016573; P:GO:0045892; P:GO:0045944; P:GO:0070933; P:GO:1900055; P:GO:1902459; P:GO:1990619; F:GO:0005515; F:GO:0032041; F:GO:0043565; F:GO:0046872; C:GO:0005737; C:GO:0070822	P:DNA mediated transformation; P:pathogenesis; P:jasmonic acid and ethylene-dependent systemic resistance; P:negative regulation of seed germination; P:histone acetylation; P:negative regulation of transcription, DNA-templated; P:positive regulation of transcription by RNA polymerase II; P:histone H4 deacetylation; P:regulation of leaf senescence; P:positive regulation of stem cell population mai…	EC:3.5.1.98	Histone deacetylase	no IPS match	no IPS match	no IPS match
TRINITY_DN10022_c0_g1_i8	histone deacetylase 9	5.2218e-69	17	P:GO:0009294; P:GO:0009405; P:GO:0009861; P:GO:0010187; P:GO:0016573; P:GO:0045892; P:GO:0045944; P:GO:0070933; P:GO:1900055; P:GO:1902459; P:GO:1990619; F:GO:0005515; F:GO:0032041; F:GO:0043565; F:GO:0046872; C:GO:0005737; C:GO:0070822	P:DNA mediated transformation; P:pathogenesis; P:jasmonic acid and ethylene-dependent systemic resistance; P:negative regulation of seed germination; P:histone acetylation; P:negative regulation of transcription, DNA-templated; P:positive regulation of transcription by RNA polymerase II; P:histone H4 deacetylation; P:regulation of leaf senescence; P:positive regulation of stem cell population mai…	EC:3.5.1.98	Histone deacetylase	IPR003084 (PRINTS); IPR000286 (PRINTS); IPR037138 (G3DSA:3.40.800.GENE3D); IPR023801 (PFAM); PTHR10625 (PANTHER); PTHR10625:SF132 (PANTHER); IPR023696 (SUPERFAMILY)	P:GO:0016575; F:GO:0004407	P:histone deacetylation; F:histone deacetylase activity
TRINITY_DN10022_c0_g1_i9	histone deacetylase 9	1.52509e-60	17	P:GO:0009294; P:GO:0009405; P:GO:0009861; P:GO:0010187; P:GO:0016573; P:GO:0045892; P:GO:0045944; P:GO:0070933; P:GO:1900055; P:GO:1902459; P:GO:1990619; F:GO:0005515; F:GO:0032041; F:GO:0043565; F:GO:0046872; C:GO:0005737; C:GO:0070822	P:DNA mediated transformation; P:pathogenesis; P:jasmonic acid and ethylene-dependent systemic resistance; P:negative regulation of seed germination; P:histone acetylation; P:negative regulation of transcription, DNA-templated; P:positive regulation of transcription by RNA polymerase II; P:histone H4 deacetylation; P:regulation of leaf senescence; P:positive regulation of stem cell population mai…	EC:3.5.1.98	Histone deacetylase	IPR003084 (PRINTS); IPR000286 (PRINTS); IPR023801 (PFAM); IPR037138 (G3DSA:3.40.800.GENE3D); PTHR10625 (PANTHER); PTHR10625:SF132 (PANTHER); IPR023696 (SUPERFAMILY)	P:GO:0016575; F:GO:0004407	P:histone deacetylation; F:histone deacetylase activity
TRINITY_DN10023_c0_g1_i1	cellulose synthase catalytic subunit	0	14	P:GO:0006952; P:GO:0009833; P:GO:0009834; P:GO:0030244; P:GO:0042538; P:GO:0071555; F:GO:0005515; F:GO:0016760; F:GO:0046872; C:GO:0005768; C:GO:0005802; C:GO:0005886; C:GO:0009506; C:GO:0016021	P:defense response; P:plant-type primary cell wall biogenesis; P:plant-type secondary cell wall biogenesis; P:cellulose biosynthetic process; P:hyperosmotic salinity response; P:cell wall organization; F:protein binding; F:cellulose synthase (UDP-forming) activity; F:metal ion binding; C:endosome; C:trans-Golgi network; C:plasma membrane; C:plasmodesma; C:integral component of membrane	EC:2.4.1.12	Cellulose synthase (UDP-forming)	IPR005150 (PFAM); PTHR13301 (PANTHER); PTHR13301:SF166 (PANTHER)	P:GO:0030244; F:GO:0016760; C:GO:0016020	P:cellulose biosynthetic process; F:cellulose synthase (UDP-forming) activity; C:membrane
TRINITY_DN10023_c0_g2_i1	Cellulose synthase family protein	1.7749e-57	16	P:GO:0006952; P:GO:0009833; P:GO:0009834; P:GO:0010400; P:GO:0030244; P:GO:0052386; F:GO:0005515; F:GO:0016760; F:GO:0046872; C:GO:0005768; C:GO:0005802; C:GO:0005886; C:GO:0009506; C:GO:0009507; C:GO:0010330; C:GO:0016021	P:defense response; P:plant-type primary cell wall biogenesis; P:plant-type secondary cell wall biogenesis; P:rhamnogalacturonan I side chain metabolic process; P:cellulose biosynthetic process; P:cell wall thickening; F:protein binding; F:cellulose synthase (UDP-forming) activity; F:metal ion binding; C:endosome; C:trans-Golgi network; C:plasma membrane; C:plasmodesma; C:chloroplast; C:cellulose…	EC:2.4.1.12	Cellulose synthase (UDP-forming)	IPR005150 (PFAM); PTHR13301:SF171 (PANTHER); PTHR13301 (PANTHER)	P:GO:0030244; F:GO:0016760; C:GO:0016020	P:cellulose biosynthetic process; F:cellulose synthase (UDP-forming) activity; C:membrane
TRINITY_DN10023_c1_g1_i1	cellulose synthase-like protein D3	0	14	P:GO:0009409; P:GO:0009833; P:GO:0009846; P:GO:0030244; P:GO:0048767; P:GO:0071555; P:GO:0097502; F:GO:0016760; F:GO:0051753; C:GO:0005768; C:GO:0005783; C:GO:0005802; C:GO:0005886; C:GO:0030173	P:response to cold; P:plant-type primary cell wall biogenesis; P:pollen germination; P:cellulose biosynthetic process; P:root hair elongation; P:cell wall organization; P:mannosylation; F:cellulose synthase (UDP-forming) activity; F:mannan synthase activity; C:endosome; C:endoplasmic reticulum; C:trans-Golgi network; C:plasma membrane; C:integral component of Golgi membrane	EC:2.4.1.12	Cellulose synthase (UDP-forming)	PF14570 (PFAM); IPR029044 (G3DSA:3.90.550.GENE3D); IPR013083 (G3DSA:3.30.40.GENE3D); IPR005150 (PFAM); PTHR13301 (PANTHER); PTHR13301:SF156 (PANTHER); IPR029044 (SUPERFAMILY); SSF57850 (SUPERFAMILY)	P:GO:0030244; F:GO:0016760; C:GO:0016020	P:cellulose biosynthetic process; F:cellulose synthase (UDP-forming) activity; C:membrane
TRINITY_DN10023_c1_g1_i2	cellulose synthase-like protein D3	0	18	P:GO:0000919; P:GO:0009409; P:GO:0009414; P:GO:0009651; P:GO:0009833; P:GO:0009846; P:GO:0030244; P:GO:0048367; P:GO:0048767; P:GO:0071555; P:GO:0097502; F:GO:0016760; F:GO:0051753; C:GO:0005768; C:GO:0005783; C:GO:0005802; C:GO:0005886; C:GO:0030173	P:cell plate assembly; P:response to cold; P:response to water deprivation; P:response to salt stress; P:plant-type primary cell wall biogenesis; P:pollen germination; P:cellulose biosynthetic process; P:shoot system development; P:root hair elongation; P:cell wall organization; P:mannosylation; F:cellulose synthase (UDP-forming) activity; F:mannan synthase activity; C:endosome; C:endoplasmic ret…	EC:2.4.1.12	Cellulose synthase (UDP-forming)	IPR029044 (G3DSA:3.90.550.GENE3D); PF14570 (PFAM); IPR013083 (G3DSA:3.30.40.GENE3D); IPR005150 (PFAM); PTHR13301:SF156 (PANTHER); PTHR13301 (PANTHER); SSF57850 (SUPERFAMILY); IPR029044 (SUPERFAMILY)	P:GO:0030244; F:GO:0016760; C:GO:0016020	P:cellulose biosynthetic process; F:cellulose synthase (UDP-forming) activity; C:membrane
TRINITY_DN10023_c1_g1_i3	cellulose synthase-like protein D3	0	18	P:GO:0000919; P:GO:0009409; P:GO:0009414; P:GO:0009651; P:GO:0009833; P:GO:0009846; P:GO:0030244; P:GO:0048367; P:GO:0048767; P:GO:0071555; P:GO:0097502; F:GO:0016760; F:GO:0051753; C:GO:0005768; C:GO:0005783; C:GO:0005802; C:GO:0005886; C:GO:0030173	P:cell plate assembly; P:response to cold; P:response to water deprivation; P:response to salt stress; P:plant-type primary cell wall biogenesis; P:pollen germination; P:cellulose biosynthetic process; P:shoot system development; P:root hair elongation; P:cell wall organization; P:mannosylation; F:cellulose synthase (UDP-forming) activity; F:mannan synthase activity; C:endosome; C:endoplasmic ret…	EC:2.4.1.12	Cellulose synthase (UDP-forming)	IPR029044 (G3DSA:3.90.550.GENE3D); PF14570 (PFAM); IPR013083 (G3DSA:3.30.40.GENE3D); IPR005150 (PFAM); PTHR13301 (PANTHER); PTHR13301:SF156 (PANTHER); SSF57850 (SUPERFAMILY); IPR029044 (SUPERFAMILY)	P:GO:0030244; F:GO:0016760; C:GO:0016020	P:cellulose biosynthetic process; F:cellulose synthase (UDP-forming) activity; C:membrane
TRINITY_DN10024_c0_g1_i1	condensin complex subunit 2-like isoform X1	0	8	P:GO:0007076; P:GO:0051301; P:GO:2000373; F:GO:0003682; F:GO:0044547; F:GO:0072587; C:GO:0000799; C:GO:0005737	P:mitotic chromosome condensation; P:cell division; P:positive regulation of DNA topoisomerase (ATP-hydrolyzing) activity; F:chromatin binding; F:DNA topoisomerase binding; F:DNA topoisomerase type II (double strand cut, ATP-hydrolyzing) activator activity; C:nuclear condensin complex; C:cytoplasm			IPR022816 (PFAM); mobidb-lite (MOBIDB_LITE); IPR022816 (PANTHER); PTHR13108:SF11 (PANTHER)	P:GO:0007076; C:GO:0000796	P:mitotic chromosome condensation; C:condensin complex
TRINITY_DN10024_c0_g1_i3	condensin complex subunit 2-like isoform X1	1.24544e-153	8	P:GO:0007076; P:GO:0051301; P:GO:2000373; F:GO:0003682; F:GO:0044547; F:GO:0072587; C:GO:0000799; C:GO:0005737	P:mitotic chromosome condensation; P:cell division; P:positive regulation of DNA topoisomerase (ATP-hydrolyzing) activity; F:chromatin binding; F:DNA topoisomerase binding; F:DNA topoisomerase type II (double strand cut, ATP-hydrolyzing) activator activity; C:nuclear condensin complex; C:cytoplasm			IPR022816 (PFAM); mobidb-lite (MOBIDB_LITE); PTHR13108:SF11 (PANTHER); IPR022816 (PANTHER)	P:GO:0007076; C:GO:0000796	P:mitotic chromosome condensation; C:condensin complex
TRINITY_DN10024_c0_g1_i4	condensin complex subunit 2-like isoform X1	0	8	P:GO:0007076; P:GO:0051301; P:GO:2000373; F:GO:0003682; F:GO:0044547; F:GO:0072587; C:GO:0000799; C:GO:0005737	P:mitotic chromosome condensation; P:cell division; P:positive regulation of DNA topoisomerase (ATP-hydrolyzing) activity; F:chromatin binding; F:DNA topoisomerase binding; F:DNA topoisomerase type II (double strand cut, ATP-hydrolyzing) activator activity; C:nuclear condensin complex; C:cytoplasm			IPR022816 (PFAM); mobidb-lite (MOBIDB_LITE); IPR022816 (PANTHER); PTHR13108:SF11 (PANTHER)	P:GO:0007076; C:GO:0000796	P:mitotic chromosome condensation; C:condensin complex
TRINITY_DN10024_c0_g1_i5	condensin complex subunit 2-like isoform X1	0	8	P:GO:0007076; P:GO:0051301; P:GO:2000373; F:GO:0003682; F:GO:0044547; F:GO:0072587; C:GO:0000799; C:GO:0005737	P:mitotic chromosome condensation; P:cell division; P:positive regulation of DNA topoisomerase (ATP-hydrolyzing) activity; F:chromatin binding; F:DNA topoisomerase binding; F:DNA topoisomerase type II (double strand cut, ATP-hydrolyzing) activator activity; C:nuclear condensin complex; C:cytoplasm			IPR022816 (PFAM); mobidb-lite (MOBIDB_LITE); IPR022816 (PANTHER); PTHR13108:SF11 (PANTHER)	P:GO:0007076; C:GO:0000796	P:mitotic chromosome condensation; C:condensin complex
TRINITY_DN10024_c0_g1_i6	condensin complex subunit 2-like isoform X1	2.36092e-111	8	P:GO:0007076; P:GO:0051301; P:GO:2000373; F:GO:0003682; F:GO:0044547; F:GO:0072587; C:GO:0000799; C:GO:0005737	P:mitotic chromosome condensation; P:cell division; P:positive regulation of DNA topoisomerase (ATP-hydrolyzing) activity; F:chromatin binding; F:DNA topoisomerase binding; F:DNA topoisomerase type II (double strand cut, ATP-hydrolyzing) activator activity; C:nuclear condensin complex; C:cytoplasm			IPR022816 (PFAM); mobidb-lite (MOBIDB_LITE); PTHR13108:SF11 (PANTHER); IPR022816 (PANTHER)	P:GO:0007076; C:GO:0000796	P:mitotic chromosome condensation; C:condensin complex
TRINITY_DN10024_c0_g1_i7	condensin complex subunit 2-like isoform X1	1.91312e-153	8	P:GO:0007076; P:GO:0051301; P:GO:2000373; F:GO:0003682; F:GO:0044547; F:GO:0072587; C:GO:0000799; C:GO:0005737	P:mitotic chromosome condensation; P:cell division; P:positive regulation of DNA topoisomerase (ATP-hydrolyzing) activity; F:chromatin binding; F:DNA topoisomerase binding; F:DNA topoisomerase type II (double strand cut, ATP-hydrolyzing) activator activity; C:nuclear condensin complex; C:cytoplasm			IPR022816 (PFAM); mobidb-lite (MOBIDB_LITE); PTHR13108:SF11 (PANTHER); IPR022816 (PANTHER)	P:GO:0007076; C:GO:0000796	P:mitotic chromosome condensation; C:condensin complex
TRINITY_DN10025_c0_g1_i1	Signal peptide peptidase-like 4	3.39961e-67	8	P:GO:0033619; F:GO:0042500; C:GO:0005765; C:GO:0005886; C:GO:0010008; C:GO:0030660; C:GO:0071458; C:GO:0071556	P:membrane protein proteolysis; F:aspartic endopeptidase activity, intramembrane cleaving; C:lysosomal membrane; C:plasma membrane; C:endosome membrane; C:Golgi-associated vesicle membrane; C:integral component of cytoplasmic side of endoplasmic reticulum membrane; C:integral component of lumenal side of endoplasmic reticulum membrane	EC:3.4.23	Acting on peptide bonds (peptidases)	PTHR12174:SF75 (PANTHER); IPR007369 (PANTHER)	F:GO:0004190; C:GO:0016021	F:aspartic-type endopeptidase activity; C:integral component of membrane
TRINITY_DN10026_c0_g1_i1	bZIP transcription factor 60	3.58281e-66	6	P:GO:0006355; P:GO:0010200; P:GO:0030968; F:GO:0003700; C:GO:0005634; C:GO:0005789	P:regulation of transcription, DNA-templated; P:response to chitin; P:endoplasmic reticulum unfolded protein response; F:DNA-binding transcription factor activity; C:nucleus; C:endoplasmic reticulum membrane			IPR004827 (PFAM); G3DSA:1.20.5.170 (GENE3D); mobidb-lite (MOBIDB_LITE); mobidb-lite (MOBIDB_LITE); PTHR47416:SF5 (PANTHER); PTHR47416 (PANTHER); IPR004827 (PROSITE_PROFILES); cd14704 (CDD); SSF57959 (SUPERFAMILY)	P:GO:0006355; F:GO:0003700	P:regulation of transcription, DNA-templated; F:DNA-binding transcription factor activity
TRINITY_DN10026_c0_g1_i2	bZip transcription factor AtbZip64	1.97863e-170	6	P:GO:0006355; P:GO:0010200; P:GO:0030968; F:GO:0003700; C:GO:0005634; C:GO:0005789	P:regulation of transcription, DNA-templated; P:response to chitin; P:endoplasmic reticulum unfolded protein response; F:DNA-binding transcription factor activity; C:nucleus; C:endoplasmic reticulum membrane			G3DSA:1.20.5.170 (GENE3D); IPR004827 (PFAM); mobidb-lite (MOBIDB_LITE); PTHR47416:SF5 (PANTHER); PTHR47416 (PANTHER); IPR004827 (PROSITE_PROFILES); cd14704 (CDD); SSF57959 (SUPERFAMILY)	P:GO:0006355; F:GO:0003700	P:regulation of transcription, DNA-templated; F:DNA-binding transcription factor activity
TRINITY_DN10026_c0_g1_i3	bZIP transcription factor 60-like isoform X2	1.81446e-129	6	P:GO:0006355; P:GO:0010200; P:GO:0030968; F:GO:0003700; C:GO:0005634; C:GO:0005789	P:regulation of transcription, DNA-templated; P:response to chitin; P:endoplasmic reticulum unfolded protein response; F:DNA-binding transcription factor activity; C:nucleus; C:endoplasmic reticulum membrane			G3DSA:1.20.5.170 (GENE3D); IPR004827 (PFAM); mobidb-lite (MOBIDB_LITE); mobidb-lite (MOBIDB_LITE); PTHR47416 (PANTHER); PTHR47416:SF5 (PANTHER); IPR004827 (PROSITE_PROFILES); cd14704 (CDD); SSF57959 (SUPERFAMILY)	P:GO:0006355; F:GO:0003700	P:regulation of transcription, DNA-templated; F:DNA-binding transcription factor activity
TRINITY_DN10026_c0_g1_i4	bZIP transcription factor 60-like isoform X1	5.13633e-153	6	P:GO:0006355; P:GO:0010200; P:GO:0030968; F:GO:0003700; C:GO:0005634; C:GO:0005789	P:regulation of transcription, DNA-templated; P:response to chitin; P:endoplasmic reticulum unfolded protein response; F:DNA-binding transcription factor activity; C:nucleus; C:endoplasmic reticulum membrane			IPR004827 (PFAM); G3DSA:1.20.5.170 (GENE3D); mobidb-lite (MOBIDB_LITE); mobidb-lite (MOBIDB_LITE); mobidb-lite (MOBIDB_LITE); mobidb-lite (MOBIDB_LITE); PTHR47416 (PANTHER); PTHR47416:SF5 (PANTHER); IPR004827 (PROSITE_PROFILES); cd14704 (CDD); SSF57959 (SUPERFAMILY)	P:GO:0006355; F:GO:0003700	P:regulation of transcription, DNA-templated; F:DNA-binding transcription factor activity
TRINITY_DN10026_c0_g1_i5	bZIP transcription factor 60	2.0577e-84	6	P:GO:0006355; P:GO:0010200; P:GO:0030968; F:GO:0003700; C:GO:0005634; C:GO:0005789	P:regulation of transcription, DNA-templated; P:response to chitin; P:endoplasmic reticulum unfolded protein response; F:DNA-binding transcription factor activity; C:nucleus; C:endoplasmic reticulum membrane			IPR004827 (PFAM); G3DSA:1.20.5.170 (GENE3D); mobidb-lite (MOBIDB_LITE); mobidb-lite (MOBIDB_LITE); PTHR47416:SF5 (PANTHER); PTHR47416 (PANTHER); IPR004827 (PROSITE_PROFILES); cd14704 (CDD); SSF57959 (SUPERFAMILY)	P:GO:0006355; F:GO:0003700	P:regulation of transcription, DNA-templated; F:DNA-binding transcription factor activity
TRINITY_DN10026_c0_g1_i6	bZIP transcription factor 60-like isoform X1	0	6	P:GO:0006355; P:GO:0010200; P:GO:0030968; F:GO:0003700; C:GO:0005634; C:GO:0005789	P:regulation of transcription, DNA-templated; P:response to chitin; P:endoplasmic reticulum unfolded protein response; F:DNA-binding transcription factor activity; C:nucleus; C:endoplasmic reticulum membrane			G3DSA:1.20.5.170 (GENE3D); IPR004827 (PFAM); mobidb-lite (MOBIDB_LITE); mobidb-lite (MOBIDB_LITE); PTHR47416:SF5 (PANTHER); PTHR47416 (PANTHER); PTHR47416:SF5 (PANTHER); PTHR47416 (PANTHER); IPR004827 (PROSITE_PROFILES); cd14704 (CDD); SSF57959 (SUPERFAMILY)	P:GO:0006355; F:GO:0003700	P:regulation of transcription, DNA-templated; F:DNA-binding transcription factor activity
TRINITY_DN10027_c0_g1_i1	polyadenylate-binding protein-interacting protein 11-like isoform X1	6.77112e-07	6	P:GO:0008150; F:GO:0000166; F:GO:0003676; F:GO:0003723; F:GO:0003729; C:GO:0005634	P:biological_process; F:nucleotide binding; F:nucleic acid binding; F:RNA binding; F:mRNA binding; C:nucleus			no IPS match	no IPS match	no IPS match
TRINITY_DN10027_c0_g1_i4	polyadenylate-binding protein-interacting protein 11-like isoform X1	5.81571e-09	1	F:GO:0003729	F:mRNA binding			no IPS match	no IPS match	no IPS match
TRINITY_DN10027_c0_g1_i5	polyadenylate-binding protein-interacting protein 11-like isoform X1	4.91125e-05	3	F:GO:0003676; F:GO:0003723; C:GO:0005634	F:nucleic acid binding; F:RNA binding; C:nucleus			no IPS match	no IPS match	no IPS match
TRINITY_DN10027_c0_g1_i6	polyadenylate-binding protein-interacting protein 11-like isoform X1	7.57129e-07	6	P:GO:0008150; F:GO:0000166; F:GO:0003676; F:GO:0003723; F:GO:0003729; C:GO:0005634	P:biological_process; F:nucleotide binding; F:nucleic acid binding; F:RNA binding; F:mRNA binding; C:nucleus			no IPS match	no IPS match	no IPS match
TRINITY_DN10027_c0_g2_i1	---NA---							no IPS match	no IPS match	no IPS match
TRINITY_DN10028_c0_g1_i1	---NA---							no IPS match	no IPS match	no IPS match
TRINITY_DN10028_c0_g2_i1	heat shock protein, putative (DUF789)	7.61358e-26	13	P:GO:0006811; P:GO:0006816; P:GO:0008150; P:GO:0070588; P:GO:1902600; F:GO:0000166; F:GO:0005388; F:GO:0005524; F:GO:0008553; F:GO:0046872; C:GO:0005783; C:GO:0016020; C:GO:0016021	P:ion transport; P:calcium ion transport; P:biological_process; P:calcium ion transmembrane transport; P:proton transmembrane transport; F:nucleotide binding; F:calcium transmembrane transporter activity, phosphorylative mechanism; F:ATP binding; F:proton-exporting ATPase activity, phosphorylative mechanism; F:metal ion binding; C:endoplasmic reticulum; C:membrane; C:integral component of membrane			IPR008507 (PFAM); PTHR31343:SF8 (PANTHER); PTHR31343 (PANTHER)	no GO terms	no GO terms
TRINITY_DN10029_c0_g1_i1	uncharacterized protein LOC111292631	9.44863e-22	1	C:GO:0016020	C:membrane			no IPS match	no IPS match	no IPS match
TRINITY_DN10029_c0_g2_i1	uncharacterized protein LOC111292631	1.7885e-68	1	C:GO:0016020	C:membrane			PTHR46610 (PANTHER); PTHR46610:SF20 (PANTHER)	no GO terms	no GO terms
TRINITY_DN10029_c0_g3_i1	uncharacterized protein LOC111292631	1.67057e-113	1	C:GO:0016020	C:membrane			PTHR46610 (PANTHER); PTHR46610:SF20 (PANTHER)	no GO terms	no GO terms
TRINITY_DN1003_c0_g1_i1	Phosphatidylinositol-4-phosphate 5-kinase family protein, putative isoform 1	0	13	P:GO:0006796; P:GO:0016042; P:GO:0036258; P:GO:0055072; P:GO:0070676; F:GO:0003729; F:GO:0016298; F:GO:0016301; F:GO:0043130; F:GO:0046872; C:GO:0000813; C:GO:0005576; C:GO:0031902	P:phosphate-containing compound metabolic process; P:lipid catabolic process; P:multivesicular body assembly; P:iron ion homeostasis; P:intralumenal vesicle formation; F:mRNA binding; F:lipase activity; F:kinase activity; F:ubiquitin binding; F:metal ion binding; C:ESCRT I complex; C:extracellular region; C:late endosome membrane			IPR013083 (G3DSA:3.30.40.GENE3D); IPR000306 (PFAM); mobidb-lite (MOBIDB_LITE); mobidb-lite (MOBIDB_LITE); mobidb-lite (MOBIDB_LITE); mobidb-lite (MOBIDB_LITE); mobidb-lite (MOBIDB_LITE); mobidb-lite (MOBIDB_LITE); mobidb-lite (MOBIDB_LITE); mobidb-lite (MOBIDB_LITE); PTHR46977 (PANTHER); IPR017455 (PROSITE_PROFILES); IPR011011 (SUPERFAMILY)	F:GO:0046872	F:metal ion binding
TRINITY_DN1003_c0_g1_i12	Phosphatidylinositol-4-phosphate 5-kinase family protein, putative isoform 1	0	13	P:GO:0006629; P:GO:0006796; P:GO:0036258; P:GO:0055072; P:GO:0070676; F:GO:0003729; F:GO:0016301; F:GO:0016788; F:GO:0043130; F:GO:0046872; C:GO:0000813; C:GO:0005576; C:GO:0031902	P:lipid metabolic process; P:phosphate-containing compound metabolic process; P:multivesicular body assembly; P:iron ion homeostasis; P:intralumenal vesicle formation; F:mRNA binding; F:kinase activity; F:hydrolase activity, acting on ester bonds; F:ubiquitin binding; F:metal ion binding; C:ESCRT I complex; C:extracellular region; C:late endosome membrane			IPR013083 (G3DSA:3.30.40.GENE3D); IPR000306 (PFAM); mobidb-lite (MOBIDB_LITE); mobidb-lite (MOBIDB_LITE); mobidb-lite (MOBIDB_LITE); mobidb-lite (MOBIDB_LITE); mobidb-lite (MOBIDB_LITE); mobidb-lite (MOBIDB_LITE); mobidb-lite (MOBIDB_LITE); mobidb-lite (MOBIDB_LITE); mobidb-lite (MOBIDB_LITE); mobidb-lite (MOBIDB_LITE); mobidb-lite (MOBIDB_LITE); mobidb-lite (MOBIDB_LITE); PTHR46977 (PANTHER); IP…	F:GO:0046872	F:metal ion binding
TRINITY_DN1003_c0_g1_i13	Phosphatidylinositol-4-phosphate 5-kinase family protein, putative isoform 1	0	13	P:GO:0006629; P:GO:0006796; P:GO:0036258; P:GO:0055072; P:GO:0070676; F:GO:0003729; F:GO:0016301; F:GO:0016788; F:GO:0043130; F:GO:0046872; C:GO:0000813; C:GO:0005576; C:GO:0031902	P:lipid metabolic process; P:phosphate-containing compound metabolic process; P:multivesicular body assembly; P:iron ion homeostasis; P:intralumenal vesicle formation; F:mRNA binding; F:kinase activity; F:hydrolase activity, acting on ester bonds; F:ubiquitin binding; F:metal ion binding; C:ESCRT I complex; C:extracellular region; C:late endosome membrane			IPR013083 (G3DSA:3.30.40.GENE3D); IPR000306 (PFAM); mobidb-lite (MOBIDB_LITE); mobidb-lite (MOBIDB_LITE); mobidb-lite (MOBIDB_LITE); mobidb-lite (MOBIDB_LITE); mobidb-lite (MOBIDB_LITE); mobidb-lite (MOBIDB_LITE); mobidb-lite (MOBIDB_LITE); mobidb-lite (MOBIDB_LITE); PTHR46977 (PANTHER); IPR017455 (PROSITE_PROFILES); IPR011011 (SUPERFAMILY)	F:GO:0046872	F:metal ion binding
TRINITY_DN1003_c0_g1_i2	Phosphatidylinositol-4-phosphate 5-kinase family protein, putative isoform 1	0	13	P:GO:0006629; P:GO:0006796; P:GO:0036258; P:GO:0055072; P:GO:0070676; F:GO:0003729; F:GO:0016301; F:GO:0016788; F:GO:0043130; F:GO:0046872; C:GO:0000813; C:GO:0005576; C:GO:0031902	P:lipid metabolic process; P:phosphate-containing compound metabolic process; P:multivesicular body assembly; P:iron ion homeostasis; P:intralumenal vesicle formation; F:mRNA binding; F:kinase activity; F:hydrolase activity, acting on ester bonds; F:ubiquitin binding; F:metal ion binding; C:ESCRT I complex; C:extracellular region; C:late endosome membrane			IPR013083 (G3DSA:3.30.40.GENE3D); IPR000306 (PFAM); mobidb-lite (MOBIDB_LITE); mobidb-lite (MOBIDB_LITE); mobidb-lite (MOBIDB_LITE); mobidb-lite (MOBIDB_LITE); mobidb-lite (MOBIDB_LITE); mobidb-lite (MOBIDB_LITE); mobidb-lite (MOBIDB_LITE); mobidb-lite (MOBIDB_LITE); mobidb-lite (MOBIDB_LITE); mobidb-lite (MOBIDB_LITE); mobidb-lite (MOBIDB_LITE); mobidb-lite (MOBIDB_LITE); PTHR46977 (PANTHER); IP…	F:GO:0046872	F:metal ion binding
TRINITY_DN1003_c0_g1_i4	phosphatidylinositol-4-phosphate 5-kinase family protein	0	14	P:GO:0006629; P:GO:0006796; P:GO:0036258; P:GO:0055072; P:GO:0070676; F:GO:0003729; F:GO:0016301; F:GO:0016788; F:GO:0043130; F:GO:0046872; C:GO:0000813; C:GO:0005576; C:GO:0031902; C:GO:0043231	P:lipid metabolic process; P:phosphate-containing compound metabolic process; P:multivesicular body assembly; P:iron ion homeostasis; P:intralumenal vesicle formation; F:mRNA binding; F:kinase activity; F:hydrolase activity, acting on ester bonds; F:ubiquitin binding; F:metal ion binding; C:ESCRT I complex; C:extracellular region; C:late endosome membrane; C:intracellular membrane-bounded organel…			IPR000306 (PFAM); IPR013083 (G3DSA:3.30.40.GENE3D); mobidb-lite (MOBIDB_LITE); mobidb-lite (MOBIDB_LITE); mobidb-lite (MOBIDB_LITE); mobidb-lite (MOBIDB_LITE); mobidb-lite (MOBIDB_LITE); mobidb-lite (MOBIDB_LITE); mobidb-lite (MOBIDB_LITE); mobidb-lite (MOBIDB_LITE); PTHR46977 (PANTHER); IPR017455 (PROSITE_PROFILES); IPR011011 (SUPERFAMILY)	F:GO:0046872	F:metal ion binding
TRINITY_DN1003_c0_g1_i5	phosphatidylinositol-4-phosphate 5-kinase family protein	0	15	P:GO:0006796; P:GO:0015031; P:GO:0016042; P:GO:0036258; P:GO:0055072; P:GO:0070676; F:GO:0003729; F:GO:0016298; F:GO:0016301; F:GO:0043130; F:GO:0046872; C:GO:0000813; C:GO:0005576; C:GO:0005634; C:GO:0031902	P:phosphate-containing compound metabolic process; P:protein transport; P:lipid catabolic process; P:multivesicular body assembly; P:iron ion homeostasis; P:intralumenal vesicle formation; F:mRNA binding; F:lipase activity; F:kinase activity; F:ubiquitin binding; F:metal ion binding; C:ESCRT I complex; C:extracellular region; C:nucleus; C:late endosome membrane			IPR013083 (G3DSA:3.30.40.GENE3D); IPR000306 (PFAM); mobidb-lite (MOBIDB_LITE); mobidb-lite (MOBIDB_LITE); PTHR46977 (PANTHER); IPR017455 (PROSITE_PROFILES); IPR011011 (SUPERFAMILY); SSF50729 (SUPERFAMILY)	F:GO:0046872	F:metal ion binding
TRINITY_DN1003_c0_g1_i6	phosphatidylinositol-4-phosphate 5-kinase family protein	0	14	P:GO:0006629; P:GO:0006796; P:GO:0036258; P:GO:0055072; P:GO:0070676; F:GO:0003729; F:GO:0016301; F:GO:0016788; F:GO:0043130; F:GO:0046872; C:GO:0000813; C:GO:0005576; C:GO:0031902; C:GO:0043231	P:lipid metabolic process; P:phosphate-containing compound metabolic process; P:multivesicular body assembly; P:iron ion homeostasis; P:intralumenal vesicle formation; F:mRNA binding; F:kinase activity; F:hydrolase activity, acting on ester bonds; F:ubiquitin binding; F:metal ion binding; C:ESCRT I complex; C:extracellular region; C:late endosome membrane; C:intracellular membrane-bounded organel…			IPR013083 (G3DSA:3.30.40.GENE3D); IPR000306 (PFAM); mobidb-lite (MOBIDB_LITE); mobidb-lite (MOBIDB_LITE); mobidb-lite (MOBIDB_LITE); mobidb-lite (MOBIDB_LITE); mobidb-lite (MOBIDB_LITE); mobidb-lite (MOBIDB_LITE); mobidb-lite (MOBIDB_LITE); mobidb-lite (MOBIDB_LITE); mobidb-lite (MOBIDB_LITE); mobidb-lite (MOBIDB_LITE); mobidb-lite (MOBIDB_LITE); mobidb-lite (MOBIDB_LITE); PTHR46977 (PANTHER); IP…	F:GO:0046872	F:metal ion binding
TRINITY_DN1003_c0_g1_i7	phosphatidylinositol-4-phosphate 5-kinase family protein	0	14	P:GO:0006629; P:GO:0006796; P:GO:0036258; P:GO:0055072; P:GO:0070676; F:GO:0003729; F:GO:0016301; F:GO:0016788; F:GO:0043130; F:GO:0046872; C:GO:0000813; C:GO:0005576; C:GO:0031902; C:GO:0043231	P:lipid metabolic process; P:phosphate-containing compound metabolic process; P:multivesicular body assembly; P:iron ion homeostasis; P:intralumenal vesicle formation; F:mRNA binding; F:kinase activity; F:hydrolase activity, acting on ester bonds; F:ubiquitin binding; F:metal ion binding; C:ESCRT I complex; C:extracellular region; C:late endosome membrane; C:intracellular membrane-bounded organel…			IPR013083 (G3DSA:3.30.40.GENE3D); IPR000306 (PFAM); mobidb-lite (MOBIDB_LITE); mobidb-lite (MOBIDB_LITE); mobidb-lite (MOBIDB_LITE); mobidb-lite (MOBIDB_LITE); mobidb-lite (MOBIDB_LITE); mobidb-lite (MOBIDB_LITE); mobidb-lite (MOBIDB_LITE); mobidb-lite (MOBIDB_LITE); mobidb-lite (MOBIDB_LITE); mobidb-lite (MOBIDB_LITE); mobidb-lite (MOBIDB_LITE); mobidb-lite (MOBIDB_LITE); PTHR46977 (PANTHER); IP…	F:GO:0046872	F:metal ion binding
TRINITY_DN1003_c0_g1_i8	phosphatidylinositol-4-phosphate 5-kinase family protein	0	14	P:GO:0006629; P:GO:0006796; P:GO:0036258; P:GO:0055072; P:GO:0070676; F:GO:0003729; F:GO:0016301; F:GO:0016788; F:GO:0043130; F:GO:0046872; C:GO:0000813; C:GO:0005576; C:GO:0031902; C:GO:0043231	P:lipid metabolic process; P:phosphate-containing compound metabolic process; P:multivesicular body assembly; P:iron ion homeostasis; P:intralumenal vesicle formation; F:mRNA binding; F:kinase activity; F:hydrolase activity, acting on ester bonds; F:ubiquitin binding; F:metal ion binding; C:ESCRT I complex; C:extracellular region; C:late endosome membrane; C:intracellular membrane-bounded organel…			IPR013083 (G3DSA:3.30.40.GENE3D); IPR000306 (PFAM); mobidb-lite (MOBIDB_LITE); mobidb-lite (MOBIDB_LITE); mobidb-lite (MOBIDB_LITE); mobidb-lite (MOBIDB_LITE); mobidb-lite (MOBIDB_LITE); mobidb-lite (MOBIDB_LITE); mobidb-lite (MOBIDB_LITE); mobidb-lite (MOBIDB_LITE); mobidb-lite (MOBIDB_LITE); mobidb-lite (MOBIDB_LITE); mobidb-lite (MOBIDB_LITE); mobidb-lite (MOBIDB_LITE); mobidb-lite (MOBIDB_LIT…	F:GO:0046872	F:metal ion binding
TRINITY_DN1003_c0_g1_i9	phosphatidylinositol-4-phosphate 5-kinase family protein	0	14	P:GO:0006629; P:GO:0006796; P:GO:0036258; P:GO:0055072; P:GO:0070676; F:GO:0003729; F:GO:0016301; F:GO:0016788; F:GO:0043130; F:GO:0046872; C:GO:0000813; C:GO:0005576; C:GO:0031902; C:GO:0043231	P:lipid metabolic process; P:phosphate-containing compound metabolic process; P:multivesicular body assembly; P:iron ion homeostasis; P:intralumenal vesicle formation; F:mRNA binding; F:kinase activity; F:hydrolase activity, acting on ester bonds; F:ubiquitin binding; F:metal ion binding; C:ESCRT I complex; C:extracellular region; C:late endosome membrane; C:intracellular membrane-bounded organel…			IPR000306 (PFAM); IPR013083 (G3DSA:3.30.40.GENE3D); mobidb-lite (MOBIDB_LITE); mobidb-lite (MOBIDB_LITE); mobidb-lite (MOBIDB_LITE); mobidb-lite (MOBIDB_LITE); mobidb-lite (MOBIDB_LITE); mobidb-lite (MOBIDB_LITE); mobidb-lite (MOBIDB_LITE); mobidb-lite (MOBIDB_LITE); PTHR46977 (PANTHER); IPR017455 (PROSITE_PROFILES); IPR011011 (SUPERFAMILY)	F:GO:0046872	F:metal ion binding
TRINITY_DN1003_c0_g2_i1	Phosphatidylinositol-4-phosphate 5-kinase family protein, putative isoform 1	0	13	P:GO:0006629; P:GO:0006796; P:GO:0036258; P:GO:0055072; P:GO:0070676; F:GO:0003729; F:GO:0016301; F:GO:0016788; F:GO:0043130; F:GO:0046872; C:GO:0000813; C:GO:0005576; C:GO:0031902	P:lipid metabolic process; P:phosphate-containing compound metabolic process; P:multivesicular body assembly; P:iron ion homeostasis; P:intralumenal vesicle formation; F:mRNA binding; F:kinase activity; F:hydrolase activity, acting on ester bonds; F:ubiquitin binding; F:metal ion binding; C:ESCRT I complex; C:extracellular region; C:late endosome membrane			IPR000306 (PFAM); IPR013083 (G3DSA:3.30.40.GENE3D); mobidb-lite (MOBIDB_LITE); mobidb-lite (MOBIDB_LITE); mobidb-lite (MOBIDB_LITE); mobidb-lite (MOBIDB_LITE); mobidb-lite (MOBIDB_LITE); mobidb-lite (MOBIDB_LITE); mobidb-lite (MOBIDB_LITE); mobidb-lite (MOBIDB_LITE); PTHR46977 (PANTHER); IPR017455 (PROSITE_PROFILES); IPR011011 (SUPERFAMILY)	F:GO:0046872	F:metal ion binding
TRINITY_DN1003_c0_g2_i2	RING/FYVE/PHD zinc finger superfamily protein	9.86499e-56	7	P:GO:0036258; P:GO:0055072; P:GO:0070676; F:GO:0003729; F:GO:0043130; C:GO:0000813; C:GO:0031902	P:multivesicular body assembly; P:iron ion homeostasis; P:intralumenal vesicle formation; F:mRNA binding; F:ubiquitin binding; C:ESCRT I complex; C:late endosome membrane			mobidb-lite (MOBIDB_LITE); mobidb-lite (MOBIDB_LITE); mobidb-lite (MOBIDB_LITE); mobidb-lite (MOBIDB_LITE); mobidb-lite (MOBIDB_LITE); mobidb-lite (MOBIDB_LITE); mobidb-lite (MOBIDB_LITE); mobidb-lite (MOBIDB_LITE); PTHR46977 (PANTHER); PTHR46977:SF1 (PANTHER)	no GO terms	no GO terms
TRINITY_DN1003_c0_g2_i4	Phosphatidylinositol-4-phosphate 5-kinase family protein, putative isoform 1	0	15	P:GO:0006796; P:GO:0015031; P:GO:0016042; P:GO:0036258; P:GO:0055072; P:GO:0070676; F:GO:0003729; F:GO:0016298; F:GO:0016301; F:GO:0043130; F:GO:0046872; C:GO:0000813; C:GO:0005576; C:GO:0005634; C:GO:0031902	P:phosphate-containing compound metabolic process; P:protein transport; P:lipid catabolic process; P:multivesicular body assembly; P:iron ion homeostasis; P:intralumenal vesicle formation; F:mRNA binding; F:lipase activity; F:kinase activity; F:ubiquitin binding; F:metal ion binding; C:ESCRT I complex; C:extracellular region; C:nucleus; C:late endosome membrane			IPR013083 (G3DSA:3.30.40.GENE3D); IPR000306 (PFAM); mobidb-lite (MOBIDB_LITE); mobidb-lite (MOBIDB_LITE); PTHR46977:SF2 (PANTHER); PTHR46977 (PANTHER); IPR017455 (PROSITE_PROFILES); IPR011011 (SUPERFAMILY)	F:GO:0046872	F:metal ion binding
TRINITY_DN1003_c0_g2_i5	phosphatidylinositol-4-phosphate 5-kinase family protein	0	15	P:GO:0006796; P:GO:0015031; P:GO:0016042; P:GO:0036258; P:GO:0055072; P:GO:0070676; F:GO:0003729; F:GO:0016298; F:GO:0016301; F:GO:0043130; F:GO:0046872; C:GO:0000813; C:GO:0005576; C:GO:0005634; C:GO:0031902	P:phosphate-containing compound metabolic process; P:protein transport; P:lipid catabolic process; P:multivesicular body assembly; P:iron ion homeostasis; P:intralumenal vesicle formation; F:mRNA binding; F:lipase activity; F:kinase activity; F:ubiquitin binding; F:metal ion binding; C:ESCRT I complex; C:extracellular region; C:nucleus; C:late endosome membrane			IPR013083 (G3DSA:3.30.40.GENE3D); IPR000306 (PFAM); mobidb-lite (MOBIDB_LITE); mobidb-lite (MOBIDB_LITE); PTHR46977 (PANTHER); IPR017455 (PROSITE_PROFILES); IPR011011 (SUPERFAMILY); SSF50729 (SUPERFAMILY)	F:GO:0046872	F:metal ion binding
TRINITY_DN1003_c0_g3_i1	protein FREE1 isoform X2	5.37535e-06						no IPS match	no IPS match	no IPS match
TRINITY_DN1003_c0_g4_i1	RING/FYVE/PHD zinc finger superfamily protein isoform 1	5.1121e-10	5	P:GO:0036258; P:GO:0070676; F:GO:0043130; C:GO:0000813; C:GO:0031902	P:multivesicular body assembly; P:intralumenal vesicle formation; F:ubiquitin binding; C:ESCRT I complex; C:late endosome membrane			no IPS match	no IPS match	no IPS match
TRINITY_DN10030_c0_g1_i1	Uncharacterized protein TCM_020767 isoform 2	9.6615e-16	1	P:GO:0006364	P:rRNA processing			no IPS match	no IPS match	no IPS match
TRINITY_DN10030_c0_g1_i2	Uncharacterized protein TCM_020767 isoform 2	2.37807e-14	1	P:GO:0006364	P:rRNA processing			mobidb-lite (MOBIDB_LITE); mobidb-lite (MOBIDB_LITE)	no GO terms	no GO terms
TRINITY_DN10030_c0_g1_i3	Uncharacterized protein TCM_020767 isoform 2	2.15034e-14	1	P:GO:0006364	P:rRNA processing			no IPS match	no IPS match	no IPS match
TRINITY_DN10031_c0_g1_i1	cotton fiber, putative (DUF761)	0	1	C:GO:0016021	C:integral component of membrane			IPR008480 (PFAM); IPR025520 (PFAM); mobidb-lite (MOBIDB_LITE); PTHR33098 (PANTHER); PTHR33098:SF1 (PANTHER)	no GO terms	no GO terms
TRINITY_DN10031_c0_g1_i2	cotton fiber, putative (DUF761)	0	1	C:GO:0016021	C:integral component of membrane			IPR008480 (PFAM); IPR025520 (PFAM); mobidb-lite (MOBIDB_LITE); PTHR33098:SF1 (PANTHER); PTHR33098 (PANTHER)	no GO terms	no GO terms
TRINITY_DN10031_c0_g1_i3	cotton fiber, putative (DUF761)	2.32905e-138	1	C:GO:0016021	C:integral component of membrane			IPR025520 (PFAM); PTHR33098:SF1 (PANTHER); PTHR33098 (PANTHER)	no GO terms	no GO terms
TRINITY_DN10031_c0_g1_i4	cotton fiber, putative (DUF761)	0	1	C:GO:0016021	C:integral component of membrane			IPR008480 (PFAM); IPR025520 (PFAM); mobidb-lite (MOBIDB_LITE); mobidb-lite (MOBIDB_LITE); mobidb-lite (MOBIDB_LITE); PTHR33098:SF1 (PANTHER); PTHR33098 (PANTHER)	no GO terms	no GO terms
TRINITY_DN10031_c0_g1_i5	cotton fiber, putative (DUF761)	0	1	C:GO:0016021	C:integral component of membrane			IPR008480 (PFAM); IPR025520 (PFAM); mobidb-lite (MOBIDB_LITE); mobidb-lite (MOBIDB_LITE); mobidb-lite (MOBIDB_LITE); PTHR33098 (PANTHER); PTHR33098:SF1 (PANTHER)	no GO terms	no GO terms
TRINITY_DN10031_c1_g1_i1	nuclear transcription factor Y subunit A-1-like	4.73097e-145	4	P:GO:0006355; F:GO:0000978; F:GO:0003700; C:GO:0016602	P:regulation of transcription, DNA-templated; F:RNA polymerase II cis-regulatory region sequence-specific DNA binding; F:DNA-binding transcription factor activity; C:CCAAT-binding factor complex			IPR001289 (PRINTS); IPR001289 (PFAM); PTHR12632:SF52 (PANTHER); IPR001289 (PANTHER); IPR001289 (PROSITE_PROFILES)	P:GO:0006355; F:GO:0003700	P:regulation of transcription, DNA-templated; F:DNA-binding transcription factor activity
TRINITY_DN10031_c1_g1_i2	nuclear transcription factor Y subunit A-1-like	5.36474e-175	4	P:GO:0006355; F:GO:0000978; F:GO:0003700; C:GO:0016602	P:regulation of transcription, DNA-templated; F:RNA polymerase II cis-regulatory region sequence-specific DNA binding; F:DNA-binding transcription factor activity; C:CCAAT-binding factor complex			IPR001289 (PRINTS); IPR001289 (PFAM); mobidb-lite (MOBIDB_LITE); IPR001289 (PANTHER); PTHR12632:SF52 (PANTHER); IPR001289 (PROSITE_PROFILES)	P:GO:0006355; F:GO:0003700	P:regulation of transcription, DNA-templated; F:DNA-binding transcription factor activity
TRINITY_DN10031_c1_g1_i3	nuclear transcription factor Y subunit A-1-like	3.98562e-117	7	P:GO:0010262; P:GO:0045892; P:GO:0055046; F:GO:0000978; F:GO:0003700; F:GO:0005515; C:GO:0016602	P:somatic embryogenesis; P:negative regulation of transcription, DNA-templated; P:microgametogenesis; F:RNA polymerase II cis-regulatory region sequence-specific DNA binding; F:DNA-binding transcription factor activity; F:protein binding; C:CCAAT-binding factor complex			mobidb-lite (MOBIDB_LITE); mobidb-lite (MOBIDB_LITE); mobidb-lite (MOBIDB_LITE); PTHR12632:SF52 (PANTHER); IPR001289 (PANTHER); IPR001289 (PROSITE_PROFILES)	P:GO:0006355; F:GO:0003700	P:regulation of transcription, DNA-templated; F:DNA-binding transcription factor activity
TRINITY_DN10031_c1_g1_i4	nuclear transcription factor Y subunit A-1-like	0	7	P:GO:0006355; P:GO:0010262; P:GO:0048510; P:GO:0055046; F:GO:0000978; F:GO:0003700; C:GO:0016602	P:regulation of transcription, DNA-templated; P:somatic embryogenesis; P:regulation of timing of transition from vegetative to reproductive phase; P:microgametogenesis; F:RNA polymerase II cis-regulatory region sequence-specific DNA binding; F:DNA-binding transcription factor activity; C:CCAAT-binding factor complex			IPR001289 (PRINTS); IPR001289 (PFAM); mobidb-lite (MOBIDB_LITE); mobidb-lite (MOBIDB_LITE); mobidb-lite (MOBIDB_LITE); PTHR12632:SF52 (PANTHER); IPR001289 (PANTHER); IPR001289 (PROSITE_PROFILES)	P:GO:0006355; F:GO:0003700	P:regulation of transcription, DNA-templated; F:DNA-binding transcription factor activity
TRINITY_DN10031_c1_g1_i5	nuclear transcription factor Y subunit A-1-like	1.42847e-164	7	P:GO:0006355; P:GO:0010262; P:GO:0048510; P:GO:0055046; F:GO:0000978; F:GO:0003700; C:GO:0016602	P:regulation of transcription, DNA-templated; P:somatic embryogenesis; P:regulation of timing of transition from vegetative to reproductive phase; P:microgametogenesis; F:RNA polymerase II cis-regulatory region sequence-specific DNA binding; F:DNA-binding transcription factor activity; C:CCAAT-binding factor complex			IPR001289 (PRINTS); IPR001289 (PFAM); mobidb-lite (MOBIDB_LITE); IPR001289 (PANTHER); PTHR12632:SF52 (PANTHER); IPR001289 (PROSITE_PROFILES)	P:GO:0006355; F:GO:0003700	P:regulation of transcription, DNA-templated; F:DNA-binding transcription factor activity
TRINITY_DN10031_c1_g1_i6	nuclear transcription factor Y subunit A-4	1.099e-22	5	P:GO:0045892; F:GO:0000978; F:GO:0003700; F:GO:0005515; C:GO:0016602	P:negative regulation of transcription, DNA-templated; F:RNA polymerase II cis-regulatory region sequence-specific DNA binding; F:DNA-binding transcription factor activity; F:protein binding; C:CCAAT-binding factor complex			no IPS match	no IPS match	no IPS match
TRINITY_DN10031_c1_g1_i7	nuclear transcription factor Y subunit A-1-like	2.68943e-100	5	P:GO:0006355; P:GO:0048316; F:GO:0000978; F:GO:0003700; C:GO:0016602	P:regulation of transcription, DNA-templated; P:seed development; F:RNA polymerase II cis-regulatory region sequence-specific DNA binding; F:DNA-binding transcription factor activity; C:CCAAT-binding factor complex			mobidb-lite (MOBIDB_LITE); mobidb-lite (MOBIDB_LITE); PTHR12632:SF52 (PANTHER); IPR001289 (PANTHER)	P:GO:0006355; F:GO:0003700	P:regulation of transcription, DNA-templated; F:DNA-binding transcription factor activity
TRINITY_DN10031_c1_g1_i8	nuclear transcription factor Y subunit A-1-like	0	7	P:GO:0006355; P:GO:0010262; P:GO:0048510; P:GO:0055046; F:GO:0000978; F:GO:0003700; C:GO:0016602	P:regulation of transcription, DNA-templated; P:somatic embryogenesis; P:regulation of timing of transition from vegetative to reproductive phase; P:microgametogenesis; F:RNA polymerase II cis-regulatory region sequence-specific DNA binding; F:DNA-binding transcription factor activity; C:CCAAT-binding factor complex			IPR001289 (PRINTS); IPR001289 (PFAM); mobidb-lite (MOBIDB_LITE); mobidb-lite (MOBIDB_LITE); mobidb-lite (MOBIDB_LITE); PTHR12632:SF52 (PANTHER); IPR001289 (PANTHER); IPR001289 (PROSITE_PROFILES)	P:GO:0006355; F:GO:0003700	P:regulation of transcription, DNA-templated; F:DNA-binding transcription factor activity
TRINITY_DN10031_c1_g2_i1	---NA---							no IPS match	no IPS match	no IPS match
TRINITY_DN10031_c2_g1_i1	---NA---							no IPS match	no IPS match	no IPS match
TRINITY_DN10031_c2_g1_i2	---NA---							no IPS match	no IPS match	no IPS match
TRINITY_DN10031_c2_g1_i3	---NA---							no IPS match	no IPS match	no IPS match
TRINITY_DN10032_c0_g1_i1	protein LAZY 1-like isoform X2	2.94991e-27	2	P:GO:0009630; P:GO:2000012	P:gravitropism; P:regulation of auxin polar transport			no IPS match	no IPS match	no IPS match
TRINITY_DN10032_c0_g1_i2	protein LAZY 1-like isoform X2	5.11006e-16	2	P:GO:0009630; P:GO:2000012	P:gravitropism; P:regulation of auxin polar transport			no IPS match	no IPS match	no IPS match
TRINITY_DN10032_c0_g2_i1	---NA---							no IPS match	no IPS match	no IPS match
TRINITY_DN10032_c0_g2_i10	protein LAZY 1-like isoform X2	1.0044e-06	2	P:GO:0009630; P:GO:2000012	P:gravitropism; P:regulation of auxin polar transport			no IPS match	no IPS match	no IPS match
TRINITY_DN10032_c0_g2_i11	---NA---							no IPS match	no IPS match	no IPS match
TRINITY_DN10032_c0_g2_i12	protein LAZY 1-like isoform X2	1.32994e-06	2	P:GO:0009630; P:GO:2000012	P:gravitropism; P:regulation of auxin polar transport			no IPS match	no IPS match	no IPS match
TRINITY_DN10032_c0_g2_i13	protein LAZY 1-like isoform X2	9.86942e-07	2	P:GO:0009630; P:GO:2000012	P:gravitropism; P:regulation of auxin polar transport			no IPS match	no IPS match	no IPS match
TRINITY_DN10032_c0_g2_i14	regulator of nonsense transcript protein	2.2142e-137	3	P:GO:0009630; P:GO:2000012; C:GO:0016020	P:gravitropism; P:regulation of auxin polar transport; C:membrane			mobidb-lite (MOBIDB_LITE); mobidb-lite (MOBIDB_LITE); IPR038928 (PANTHER)	P:GO:0009630; P:GO:2000012	P:gravitropism; P:regulation of auxin polar transport
TRINITY_DN10032_c0_g2_i2	protein LAZY 1-like isoform X2	1.21648e-06	2	P:GO:0009630; P:GO:2000012	P:gravitropism; P:regulation of auxin polar transport			no IPS match	no IPS match	no IPS match
TRINITY_DN10032_c0_g2_i3	protein LAZY 1-like isoform X2	1.56209e-06	2	P:GO:0009630; P:GO:2000012	P:gravitropism; P:regulation of auxin polar transport			no IPS match	no IPS match	no IPS match
TRINITY_DN10032_c0_g2_i4	regulator of nonsense transcript protein	1.12342e-138	3	P:GO:0009630; P:GO:2000012; C:GO:0016020	P:gravitropism; P:regulation of auxin polar transport; C:membrane			mobidb-lite (MOBIDB_LITE); mobidb-lite (MOBIDB_LITE); IPR038928 (PANTHER)	P:GO:0009630; P:GO:2000012	P:gravitropism; P:regulation of auxin polar transport
TRINITY_DN10032_c0_g2_i5	---NA---							no IPS match	no IPS match	no IPS match
TRINITY_DN10032_c0_g2_i6	protein LAZY 1-like isoform X2	1.0332e-06	2	P:GO:0009630; P:GO:2000012	P:gravitropism; P:regulation of auxin polar transport			no IPS match	no IPS match	no IPS match
TRINITY_DN10032_c0_g2_i7	regulator of nonsense transcript protein	4.58785e-140	3	P:GO:0009630; P:GO:2000012; C:GO:0016020	P:gravitropism; P:regulation of auxin polar transport; C:membrane			mobidb-lite (MOBIDB_LITE); mobidb-lite (MOBIDB_LITE); IPR038928 (PANTHER)	P:GO:0009630; P:GO:2000012	P:gravitropism; P:regulation of auxin polar transport
TRINITY_DN10032_c0_g2_i8	protein LAZY 1-like isoform X2	1.2191e-06	2	P:GO:0009630; P:GO:2000012	P:gravitropism; P:regulation of auxin polar transport			no IPS match	no IPS match	no IPS match
TRINITY_DN10032_c0_g2_i9	---NA---							no IPS match	no IPS match	no IPS match
TRINITY_DN10033_c0_g1_i1	fasciclin-like arabinogalactan protein 4	1.23882e-147	5	P:GO:0009738; P:GO:0009825; P:GO:0048354; F:GO:0030247; C:GO:0046658	P:abscisic acid-activated signaling pathway; P:multidimensional cell growth; P:mucilage biosynthetic process involved in seed coat development; F:polysaccharide binding; C:anchored component of plasma membrane			IPR000782 (PFAM); IPR036378 (G3DSA:2.30.180.GENE3D); IPR033254 (PANTHER); PTHR32382:SF0 (PANTHER); IPR000782 (PROSITE_PROFILES); IPR000782 (PROSITE_PROFILES); IPR036378 (SUPERFAMILY); IPR036378 (SUPERFAMILY)	no GO terms	no GO terms
TRINITY_DN10034_c0_g1_i1	tubulin alpha-2 chain	3.57117e-58	11	P:GO:0000226; P:GO:0000278; F:GO:0003924; F:GO:0005200; F:GO:0005525; C:GO:0005618; C:GO:0005773; C:GO:0005829; C:GO:0005874; C:GO:0005886; C:GO:0009506	P:microtubule cytoskeleton organization; P:mitotic cell cycle; F:GTPase activity; F:structural constituent of cytoskeleton; F:GTP binding; C:cell wall; C:vacuole; C:cytosol; C:microtubule; C:plasma membrane; C:plasmodesma	EC:3.6.1.15	Nucleoside-triphosphate phosphatase	no IPS match	no IPS match	no IPS match
TRINITY_DN10034_c0_g1_i2	tubulin alpha-2 chain	5.74791e-59	11	P:GO:0000226; P:GO:0000278; F:GO:0003924; F:GO:0005200; F:GO:0005525; C:GO:0005618; C:GO:0005773; C:GO:0005829; C:GO:0005874; C:GO:0005886; C:GO:0009506	P:microtubule cytoskeleton organization; P:mitotic cell cycle; F:GTPase activity; F:structural constituent of cytoskeleton; F:GTP binding; C:cell wall; C:vacuole; C:cytosol; C:microtubule; C:plasma membrane; C:plasmodesma	EC:3.6.1.15	Nucleoside-triphosphate phosphatase	no IPS match	no IPS match	no IPS match
TRINITY_DN10035_c0_g1_i1	1-aminocyclopropane-1-carboxylate synthase	4.423e-133	16	P:GO:0006952; P:GO:0006979; P:GO:0009611; P:GO:0009612; P:GO:0009693; P:GO:0009733; P:GO:0009753; P:GO:0009835; P:GO:0010087; P:GO:0015940; P:GO:0042218; P:GO:0051301; F:GO:0003864; F:GO:0016847; F:GO:0030170; F:GO:0042802	P:defense response; P:response to oxidative stress; P:response to wounding; P:response to mechanical stimulus; P:ethylene biosynthetic process; P:response to auxin; P:response to jasmonic acid; P:fruit ripening; P:phloem or xylem histogenesis; P:pantothenate biosynthetic process; P:1-aminocyclopropane-1-carboxylate biosynthetic process; P:cell division; F:3-methyl-2-oxobutanoate hydroxymethyltran…	EC:4.4.1.14; EC:2.1.2.11	1-aminocyclopropane-1-carboxylate synthase; 3-methyl-2-oxobutanoate hydroxymethyltransferase	PR00753 (PRINTS); IPR015422 (G3DSA:3.90.1150.GENE3D); IPR004839 (PFAM); PTHR43795 (PANTHER); PTHR43795:SF61 (PANTHER); IPR015424 (SUPERFAMILY)	P:GO:0009058; F:GO:0003824; F:GO:0030170	P:biosynthetic process; F:catalytic activity; F:pyridoxal phosphate binding
TRINITY_DN10036_c0_g1_i1	callose synthase 1	2.33902e-103	8	P:GO:0006075; P:GO:0008360; P:GO:0071555; F:GO:0003843; C:GO:0000148; C:GO:0009504; C:GO:0009506; C:GO:0016021	P:(1->3)-beta-D-glucan biosynthetic process; P:regulation of cell shape; P:cell wall organization; F:1,3-beta-D-glucan synthase activity; C:1,3-beta-D-glucan synthase complex; C:cell plate; C:plasmodesma; C:integral component of membrane	EC:2.4.1.34	1,3-beta-glucan synthase	IPR003440 (PFAM); PTHR12741 (PANTHER); IPR026953 (PTHR12741:PANTHER)	P:GO:0006075; F:GO:0003843; C:GO:0000148; C:GO:0016020	P:(1->3)-beta-D-glucan biosynthetic process; F:1,3-beta-D-glucan synthase activity; C:1,3-beta-D-glucan synthase complex; C:membrane
TRINITY_DN10037_c0_g1_i1	Calcium-binding EF-hand family protein	3.05205e-138	4	P:GO:0019722; P:GO:1900425; F:GO:0005509; C:GO:0016020	P:calcium-mediated signaling; P:negative regulation of defense response to bacterium; F:calcium ion binding; C:membrane			IPR002048 (PFAM); G3DSA:1.10.238.10 (GENE3D); PTHR10891:SF805 (PANTHER); IPR039647 (PANTHER); IPR002048 (PROSITE_PROFILES); IPR002048 (PROSITE_PROFILES); IPR002048 (CDD); IPR011992 (SUPERFAMILY)	F:GO:0005509	F:calcium ion binding
TRINITY_DN10037_c0_g2_i1	Calcium-binding EF-hand family protein	2.84834e-102	4	P:GO:0019722; P:GO:1900425; F:GO:0005509; C:GO:0016020	P:calcium-mediated signaling; P:negative regulation of defense response to bacterium; F:calcium ion binding; C:membrane			IPR002048 (PFAM); G3DSA:1.10.238.10 (GENE3D); PTHR10891:SF805 (PANTHER); IPR039647 (PANTHER); IPR002048 (PROSITE_PROFILES); IPR002048 (PROSITE_PROFILES); IPR002048 (CDD); IPR011992 (SUPERFAMILY)	F:GO:0005509	F:calcium ion binding
TRINITY_DN10038_c0_g1_i1	protein TPR2-like isoform X1	5.73945e-48	1	P:GO:0006355	P:regulation of transcription, DNA-templated			mobidb-lite (MOBIDB_LITE)	no GO terms	no GO terms
TRINITY_DN10039_c0_g1_i1	3-hydroxyacyl-CoA dehydrogenase family protein	0	6	P:GO:0006631; P:GO:0055114; F:GO:0003857; F:GO:0016836; F:GO:0070403; C:GO:0005777	P:fatty acid metabolic process; P:oxidation-reduction process; F:3-hydroxyacyl-CoA dehydrogenase activity; F:hydro-lyase activity; F:NAD+ binding; C:peroxisome	EC:1.1.1.35	3-hydroxyacyl-CoA dehydrogenase	IPR013328 (G3DSA:1.10.1040.GENE3D); IPR022694 (PIRSF); G3DSA:3.40.50.720 (GENE3D); IPR006176 (PFAM); IPR006108 (PFAM); PTHR43145:SF9 (PANTHER); PTHR43145 (PANTHER); IPR036291 (SUPERFAMILY); IPR008927 (SUPERFAMILY)	P:GO:0006631; P:GO:0055114; F:GO:0003857; F:GO:0016491; F:GO:0070403	P:fatty acid metabolic process; P:oxidation-reduction process; F:3-hydroxyacyl-CoA dehydrogenase activity; F:oxidoreductase activity; F:NAD+ binding
TRINITY_DN10039_c0_g1_i2	3-hydroxyacyl-CoA dehydrogenase family protein	7.43226e-114	10	P:GO:0006635; P:GO:0009695; F:GO:0003857; F:GO:0004300; F:GO:0016508; F:GO:0070403; C:GO:0005618; C:GO:0005730; C:GO:0005777; C:GO:0009506	P:fatty acid beta-oxidation; P:jasmonic acid biosynthetic process; F:3-hydroxyacyl-CoA dehydrogenase activity; F:enoyl-CoA hydratase activity; F:long-chain-enoyl-CoA hydratase activity; F:NAD+ binding; C:cell wall; C:nucleolus; C:peroxisome; C:plasmodesma	EC:1.1.1.35; EC:4.2.1.74; EC:4.2.1.17	3-hydroxyacyl-CoA dehydrogenase; Long-chain-enoyl-CoA hydratase; Enoyl-CoA hydratase	IPR006108 (PFAM); IPR013328 (G3DSA:1.10.1040.GENE3D); G3DSA:3.40.50.720 (GENE3D); IPR006176 (PFAM); PTHR43145:SF9 (PANTHER); PTHR43145 (PANTHER); IPR036291 (SUPERFAMILY); IPR008927 (SUPERFAMILY)	P:GO:0006631; P:GO:0055114; F:GO:0003857; F:GO:0016491	P:fatty acid metabolic process; P:oxidation-reduction process; F:3-hydroxyacyl-CoA dehydrogenase activity; F:oxidoreductase activity
TRINITY_DN10039_c0_g1_i3	3-hydroxyacyl-CoA dehydrogenase family protein	7.60646e-87	5	P:GO:0006631; P:GO:0055114; F:GO:0003857; F:GO:0070403; C:GO:0005777	P:fatty acid metabolic process; P:oxidation-reduction process; F:3-hydroxyacyl-CoA dehydrogenase activity; F:NAD+ binding; C:peroxisome	EC:1.1.1.35	3-hydroxyacyl-CoA dehydrogenase	IPR006108 (PFAM); IPR013328 (G3DSA:1.10.1040.GENE3D); PTHR43145:SF9 (PANTHER); PTHR43145 (PANTHER); IPR008927 (SUPERFAMILY)	P:GO:0006631; P:GO:0055114; F:GO:0003857; F:GO:0016491	P:fatty acid metabolic process; P:oxidation-reduction process; F:3-hydroxyacyl-CoA dehydrogenase activity; F:oxidoreductase activity
TRINITY_DN1004_c0_g1_i1	las1-like family protein	0	6	P:GO:0000460; P:GO:0000470; P:GO:0090305; F:GO:0004519; C:GO:0030687; C:GO:0090730	P:maturation of 5.8S rRNA; P:maturation of LSU-rRNA; P:nucleic acid phosphodiester bond hydrolysis; F:endonuclease activity; C:preribosome, large subunit precursor; C:Las1 complex			IPR007174 (PANTHER)	P:GO:0006364; F:GO:0004519; C:GO:0090730	P:rRNA processing; F:endonuclease activity; C:Las1 complex
TRINITY_DN1004_c0_g1_i2	las1-like family protein	0	6	P:GO:0000460; P:GO:0000470; P:GO:0090305; F:GO:0004519; C:GO:0030687; C:GO:0090730	P:maturation of 5.8S rRNA; P:maturation of LSU-rRNA; P:nucleic acid phosphodiester bond hydrolysis; F:endonuclease activity; C:preribosome, large subunit precursor; C:Las1 complex			IPR007174 (PFAM); IPR007174 (PANTHER)	P:GO:0006364; F:GO:0004519; C:GO:0090730	P:rRNA processing; F:endonuclease activity; C:Las1 complex
TRINITY_DN10040_c0_g1_i1	protein TIC 20-I, chloroplastic-like	0	5	P:GO:0045037; F:GO:0005515; F:GO:0008320; C:GO:0009706; C:GO:0016021	P:protein import into chloroplast stroma; F:protein binding; F:protein transmembrane transporter activity; C:chloroplast inner membrane; C:integral component of membrane			IPR005691 (TIGRFAM); IPR005691 (PFAM); IPR005691 (PANTHER); PTHR33510:SF9 (PANTHER)	no GO terms	no GO terms
TRINITY_DN10040_c0_g1_i2	protein TIC 20-I, chloroplastic-like	0	5	P:GO:0045037; F:GO:0005515; F:GO:0008320; C:GO:0009706; C:GO:0016021	P:protein import into chloroplast stroma; F:protein binding; F:protein transmembrane transporter activity; C:chloroplast inner membrane; C:integral component of membrane			IPR005691 (TIGRFAM); IPR005691 (PFAM); IPR005691 (PANTHER); PTHR33510:SF9 (PANTHER)	no GO terms	no GO terms
TRINITY_DN10041_c0_g1_i1	plasma membrane intrinsic protein 1B	5.28412e-08	10	P:GO:0006833; P:GO:0009414; P:GO:0009651; P:GO:0055085; F:GO:0005515; F:GO:0015250; C:GO:0005773; C:GO:0005886; C:GO:0009506; C:GO:0031224	P:water transport; P:response to water deprivation; P:response to salt stress; P:transmembrane transport; F:protein binding; F:water channel activity; C:vacuole; C:plasma membrane; C:plasmodesma; C:intrinsic component of membrane			IPR000425 (PFAM); IPR023271 (G3DSA:1.20.1080.GENE3D); IPR034294 (PANTHER); PTHR45687:SF33 (PANTHER); IPR023271 (SUPERFAMILY)	P:GO:0055085; F:GO:0015267; C:GO:0016020	P:transmembrane transport; F:channel activity; C:membrane
TRINITY_DN10041_c0_g2_i1	---NA---							no IPS match	no IPS match	no IPS match
TRINITY_DN10041_c1_g1_i1	plasma membrane intrinsic protein 1B	2.68448e-53	10	P:GO:0006833; P:GO:0009414; P:GO:0009651; P:GO:0055085; F:GO:0005515; F:GO:0015250; C:GO:0005773; C:GO:0005886; C:GO:0009506; C:GO:0016021	P:water transport; P:response to water deprivation; P:response to salt stress; P:transmembrane transport; F:protein binding; F:water channel activity; C:vacuole; C:plasma membrane; C:plasmodesma; C:integral component of membrane			IPR000425 (PFAM); IPR023271 (G3DSA:1.20.1080.GENE3D); mobidb-lite (MOBIDB_LITE); IPR034294 (PANTHER); PTHR45687:SF33 (PANTHER)	P:GO:0055085; F:GO:0015267; C:GO:0016020	P:transmembrane transport; F:channel activity; C:membrane
TRINITY_DN10042_c0_g1_i1	nucleic acid/nucleotide binding protein	1.87869e-57	2	F:GO:0003723; C:GO:0110165	F:RNA binding; C:cellular anatomical entity			mobidb-lite (MOBIDB_LITE); mobidb-lite (MOBIDB_LITE); PTHR10501:SF53 (PANTHER); PTHR10501 (PANTHER)	no GO terms	no GO terms
TRINITY_DN10043_c0_g1_i1	Histone superfamily protein	2.8945e-79	6	P:GO:0009567; P:GO:0048235; F:GO:0003677; F:GO:0046982; C:GO:0000786; C:GO:0048555	P:double fertilization forming a zygote and endosperm; P:pollen sperm cell differentiation; F:DNA binding; F:protein heterodimerization activity; C:nucleosome; C:generative cell nucleus			IPR000164 (PRINTS); IPR009072 (G3DSA:1.10.20.GENE3D); IPR007125 (PFAM); mobidb-lite (MOBIDB_LITE); PTHR11426:SF224 (PANTHER); IPR000164 (PANTHER); IPR009072 (SUPERFAMILY)	F:GO:0003677; F:GO:0046982; C:GO:0000786	F:DNA binding; F:protein heterodimerization activity; C:nucleosome
TRINITY_DN10043_c0_g2_i1	Histone superfamily protein	9.78345e-80	6	P:GO:0009567; P:GO:0048235; F:GO:0003677; F:GO:0046982; C:GO:0000786; C:GO:0048555	P:double fertilization forming a zygote and endosperm; P:pollen sperm cell differentiation; F:DNA binding; F:protein heterodimerization activity; C:nucleosome; C:generative cell nucleus			IPR000164 (PRINTS); IPR009072 (G3DSA:1.10.20.GENE3D); IPR007125 (PFAM); mobidb-lite (MOBIDB_LITE); PTHR11426:SF224 (PANTHER); IPR000164 (PANTHER); IPR009072 (SUPERFAMILY)	F:GO:0003677; F:GO:0046982; C:GO:0000786	F:DNA binding; F:protein heterodimerization activity; C:nucleosome
TRINITY_DN10043_c0_g2_i2	Histone superfamily protein	7.14535e-32	6	P:GO:0009567; P:GO:0048235; F:GO:0003677; F:GO:0046982; C:GO:0000786; C:GO:0048555	P:double fertilization forming a zygote and endosperm; P:pollen sperm cell differentiation; F:DNA binding; F:protein heterodimerization activity; C:nucleosome; C:generative cell nucleus			IPR000164 (PRINTS); IPR007125 (PFAM); IPR009072 (G3DSA:1.10.20.GENE3D); mobidb-lite (MOBIDB_LITE); PTHR11426:SF224 (PANTHER); IPR000164 (PANTHER); IPR009072 (SUPERFAMILY)	F:GO:0003677; F:GO:0046982; C:GO:0000786	F:DNA binding; F:protein heterodimerization activity; C:nucleosome
TRINITY_DN10043_c0_g3_i1	Histone superfamily protein	3.91212e-79	6	P:GO:0009567; P:GO:0048235; F:GO:0003677; F:GO:0046982; C:GO:0000786; C:GO:0048555	P:double fertilization forming a zygote and endosperm; P:pollen sperm cell differentiation; F:DNA binding; F:protein heterodimerization activity; C:nucleosome; C:generative cell nucleus			IPR000164 (PRINTS); IPR009072 (G3DSA:1.10.20.GENE3D); IPR007125 (PFAM); mobidb-lite (MOBIDB_LITE); PTHR11426:SF224 (PANTHER); IPR000164 (PANTHER); IPR009072 (SUPERFAMILY)	F:GO:0003677; F:GO:0046982; C:GO:0000786	F:DNA binding; F:protein heterodimerization activity; C:nucleosome
TRINITY_DN10044_c0_g1_i1	lysM domain-containing GPI-anchored protein 2-like	0	4	P:GO:0050896; F:GO:0008061; C:GO:0009506; C:GO:0046658	P:response to stimulus; F:chitin binding; C:plasmodesma; C:anchored component of plasma membrane			IPR018392 (PFAM); IPR036779 (G3DSA:3.10.350.GENE3D); IPR036779 (G3DSA:3.10.350.GENE3D); PTHR33734 (PANTHER); PTHR33734:SF11 (PANTHER); IPR018392 (PROSITE_PROFILES); IPR018392 (PROSITE_PROFILES); IPR018392 (CDD); IPR018392 (CDD); SSF54106 (SUPERFAMILY); SSF54106 (SUPERFAMILY)	no GO terms	no GO terms
TRINITY_DN10044_c0_g1_i2	lysM domain-containing GPI-anchored protein 2-like	0	4	P:GO:0050896; F:GO:0008061; C:GO:0009506; C:GO:0046658	P:response to stimulus; F:chitin binding; C:plasmodesma; C:anchored component of plasma membrane			IPR018392 (PFAM); IPR036779 (G3DSA:3.10.350.GENE3D); IPR036779 (G3DSA:3.10.350.GENE3D); PTHR33734 (PANTHER); PTHR33734:SF11 (PANTHER); IPR018392 (PROSITE_PROFILES); IPR018392 (PROSITE_PROFILES); IPR018392 (CDD); IPR018392 (CDD); SSF54106 (SUPERFAMILY); SSF54106 (SUPERFAMILY)	no GO terms	no GO terms
TRINITY_DN10044_c0_g1_i3	lysM domain-containing GPI-anchored protein 2-like	0	4	P:GO:0050896; F:GO:0008061; C:GO:0009506; C:GO:0046658	P:response to stimulus; F:chitin binding; C:plasmodesma; C:anchored component of plasma membrane			IPR018392 (PFAM); IPR036779 (G3DSA:3.10.350.GENE3D); IPR036779 (G3DSA:3.10.350.GENE3D); PTHR33734 (PANTHER); PTHR33734:SF11 (PANTHER); IPR018392 (PROSITE_PROFILES); IPR018392 (PROSITE_PROFILES); IPR018392 (CDD); IPR018392 (CDD); SSF54106 (SUPERFAMILY); SSF54106 (SUPERFAMILY)	no GO terms	no GO terms
TRINITY_DN10044_c0_g2_i1	lysM domain-containing GPI-anchored protein 2-like	9.414e-172	4	P:GO:0050896; F:GO:0008061; C:GO:0009506; C:GO:0046658	P:response to stimulus; F:chitin binding; C:plasmodesma; C:anchored component of plasma membrane			IPR036779 (G3DSA:3.10.350.GENE3D); IPR018392 (PFAM); IPR036779 (G3DSA:3.10.350.GENE3D); PTHR33734 (PANTHER); PTHR33734:SF11 (PANTHER); IPR018392 (PROSITE_PROFILES); IPR018392 (PROSITE_PROFILES); IPR018392 (CDD); IPR018392 (CDD); SSF54106 (SUPERFAMILY); SSF54106 (SUPERFAMILY)	no GO terms	no GO terms
TRINITY_DN10045_c0_g1_i1	HVA22-like protein a	0	5	P:GO:0090502; F:GO:0003676; F:GO:0004523; F:GO:0008270; C:GO:0016021	P:RNA phosphodiester bond hydrolysis, endonucleolytic; F:nucleic acid binding; F:RNA-DNA hybrid ribonuclease activity; F:zinc ion binding; C:integral component of membrane	EC:3.1.30; EC:3.1.26; EC:3.1.26.4	Acting on ester bonds; Acting on ester bonds; Ribonuclease H	IPR004345 (PFAM); IPR036397 (G3DSA:3.30.420.GENE3D); PF12874 (PFAM); G3DSA:3.30.160.60 (GENE3D); IPR002156 (PFAM); PTHR12300:SF57 (PANTHER); IPR004345 (PANTHER); IPR002156 (PROSITE_PROFILES); cd06222 (CDD); IPR036236 (SUPERFAMILY); IPR012337 (SUPERFAMILY)	F:GO:0003676; F:GO:0004523	F:nucleic acid binding; F:RNA-DNA hybrid ribonuclease activity
TRINITY_DN10045_c0_g1_i2	HVA22-like protein a	0	5	P:GO:0090502; F:GO:0003676; F:GO:0004523; F:GO:0008270; C:GO:0016020	P:RNA phosphodiester bond hydrolysis, endonucleolytic; F:nucleic acid binding; F:RNA-DNA hybrid ribonuclease activity; F:zinc ion binding; C:membrane	EC:3.1.30; EC:3.1.26; EC:3.1.26.4	Acting on ester bonds; Acting on ester bonds; Ribonuclease H	IPR004345 (PFAM); IPR036397 (G3DSA:3.30.420.GENE3D); PF12874 (PFAM); G3DSA:3.30.160.60 (GENE3D); IPR002156 (PFAM); PTHR12300:SF57 (PANTHER); IPR004345 (PANTHER); IPR002156 (PROSITE_PROFILES); cd06222 (CDD); IPR036236 (SUPERFAMILY); IPR012337 (SUPERFAMILY)	F:GO:0003676; F:GO:0004523	F:nucleic acid binding; F:RNA-DNA hybrid ribonuclease activity
TRINITY_DN10045_c0_g1_i3	HVA22-like protein a	0	5	P:GO:0090502; F:GO:0003676; F:GO:0004523; F:GO:0008270; C:GO:0016021	P:RNA phosphodiester bond hydrolysis, endonucleolytic; F:nucleic acid binding; F:RNA-DNA hybrid ribonuclease activity; F:zinc ion binding; C:integral component of membrane	EC:3.1.30; EC:3.1.26; EC:3.1.26.4	Acting on ester bonds; Acting on ester bonds; Ribonuclease H	PF12874 (PFAM); IPR004345 (PFAM); IPR002156 (PFAM); IPR036397 (G3DSA:3.30.420.GENE3D); G3DSA:3.30.160.60 (GENE3D); PTHR12300:SF57 (PANTHER); IPR004345 (PANTHER); IPR002156 (PROSITE_PROFILES); cd06222 (CDD); IPR036236 (SUPERFAMILY); IPR012337 (SUPERFAMILY)	F:GO:0003676; F:GO:0004523	F:nucleic acid binding; F:RNA-DNA hybrid ribonuclease activity
TRINITY_DN10045_c0_g1_i4	HVA22-like protein a	0	5	P:GO:0090502; F:GO:0003676; F:GO:0004523; F:GO:0008270; C:GO:0016021	P:RNA phosphodiester bond hydrolysis, endonucleolytic; F:nucleic acid binding; F:RNA-DNA hybrid ribonuclease activity; F:zinc ion binding; C:integral component of membrane	EC:3.1.30; EC:3.1.26; EC:3.1.26.4	Acting on ester bonds; Acting on ester bonds; Ribonuclease H	PF12874 (PFAM); G3DSA:3.30.160.60 (GENE3D); IPR036397 (G3DSA:3.30.420.GENE3D); IPR004345 (PFAM); IPR002156 (PFAM); IPR004345 (PANTHER); PTHR12300:SF57 (PANTHER); IPR002156 (PROSITE_PROFILES); cd06222 (CDD); IPR012337 (SUPERFAMILY); IPR036236 (SUPERFAMILY)	F:GO:0003676; F:GO:0004523	F:nucleic acid binding; F:RNA-DNA hybrid ribonuclease activity
TRINITY_DN10045_c0_g2_i1	HVA22-like protein a, putative isoform 2	0	6	P:GO:0050896; P:GO:0090502; F:GO:0003676; F:GO:0004523; F:GO:0008270; C:GO:0016021	P:response to stimulus; P:RNA phosphodiester bond hydrolysis, endonucleolytic; F:nucleic acid binding; F:RNA-DNA hybrid ribonuclease activity; F:zinc ion binding; C:integral component of membrane	EC:3.1.30; EC:3.1.26; EC:3.1.26.4	Acting on ester bonds; Acting on ester bonds; Ribonuclease H	G3DSA:3.30.160.60 (GENE3D); PF12874 (PFAM); IPR004345 (PFAM); IPR002156 (PFAM); IPR036397 (G3DSA:3.30.420.GENE3D); PTHR12300:SF57 (PANTHER); IPR004345 (PANTHER); IPR002156 (PROSITE_PROFILES); cd06222 (CDD); IPR036236 (SUPERFAMILY); IPR012337 (SUPERFAMILY)	F:GO:0003676; F:GO:0004523	F:nucleic acid binding; F:RNA-DNA hybrid ribonuclease activity
TRINITY_DN10045_c1_g1_i1	NAC domain containing protein 50	6.98703e-19	22	P:GO:0002237; P:GO:0006952; P:GO:0009555; P:GO:0009644; P:GO:0009819; P:GO:0009908; P:GO:0009962; P:GO:0010150; P:GO:0010267; P:GO:0034720; P:GO:0045892; P:GO:0045893; P:GO:0048573; P:GO:0060966; P:GO:2000377; F:GO:0000976; F:GO:0003700; F:GO:0005515; C:GO:0005730; C:GO:0005783; C:GO:0005789; C:GO:0016021	P:response to molecule of bacterial origin; P:defense response; P:pollen development; P:response to high light intensity; P:drought recovery; P:flower development; P:regulation of flavonoid biosynthetic process; P:leaf senescence; P:production of ta-siRNAs involved in RNA interference; P:histone H3-K4 demethylation; P:negative regulation of transcription, DNA-templated; P:positive regulation of t…			no IPS match	no IPS match	no IPS match
TRINITY_DN10045_c1_g1_i2	NAC domain containing protein 50	7.28069e-91	18	P:GO:0009644; P:GO:0009819; P:GO:0009908; P:GO:0009962; P:GO:0010150; P:GO:0034720; P:GO:0045892; P:GO:0045893; P:GO:0048573; P:GO:0060966; P:GO:2000377; F:GO:0000976; F:GO:0003700; F:GO:0005515; C:GO:0005634; C:GO:0005783; C:GO:0005789; C:GO:0016021	P:response to high light intensity; P:drought recovery; P:flower development; P:regulation of flavonoid biosynthetic process; P:leaf senescence; P:histone H3-K4 demethylation; P:negative regulation of transcription, DNA-templated; P:positive regulation of transcription, DNA-templated; P:photoperiodism, flowering; P:regulation of gene silencing by RNA; P:regulation of reactive oxygen species metab…			IPR003441 (PFAM); IPR036093 (G3DSA:3.30.310.GENE3D); PTHR31989 (PANTHER); PTHR31989:SF219 (PANTHER); IPR003441 (PROSITE_PROFILES); IPR036093 (SUPERFAMILY)	P:GO:0006355; F:GO:0003677	P:regulation of transcription, DNA-templated; F:DNA binding
TRINITY_DN10045_c1_g1_i3	NAC domain containing protein 50	2.01875e-84	17	P:GO:0009644; P:GO:0009819; P:GO:0009962; P:GO:0010150; P:GO:0034720; P:GO:0045892; P:GO:0045893; P:GO:0048573; P:GO:0060966; P:GO:2000377; F:GO:0000976; F:GO:0003700; F:GO:0005515; C:GO:0005634; C:GO:0005737; C:GO:0012505; C:GO:0016020	P:response to high light intensity; P:drought recovery; P:regulation of flavonoid biosynthetic process; P:leaf senescence; P:histone H3-K4 demethylation; P:negative regulation of transcription, DNA-templated; P:positive regulation of transcription, DNA-templated; P:photoperiodism, flowering; P:regulation of gene silencing by RNA; P:regulation of reactive oxygen species metabolic process; F:transc…			IPR003441 (PFAM); IPR036093 (G3DSA:3.30.310.GENE3D); PTHR31989 (PANTHER); PTHR31989:SF219 (PANTHER); IPR003441 (PROSITE_PROFILES); IPR036093 (SUPERFAMILY)	P:GO:0006355; F:GO:0003677	P:regulation of transcription, DNA-templated; F:DNA binding
TRINITY_DN10045_c1_g1_i4	NAC domain containing protein 50	4.03416e-55	18	P:GO:0009644; P:GO:0009819; P:GO:0009908; P:GO:0009962; P:GO:0010150; P:GO:0034720; P:GO:0045892; P:GO:0045893; P:GO:0048573; P:GO:0060966; P:GO:2000377; F:GO:0000976; F:GO:0003700; F:GO:0005515; C:GO:0005634; C:GO:0005783; C:GO:0005789; C:GO:0016021	P:response to high light intensity; P:drought recovery; P:flower development; P:regulation of flavonoid biosynthetic process; P:leaf senescence; P:histone H3-K4 demethylation; P:negative regulation of transcription, DNA-templated; P:positive regulation of transcription, DNA-templated; P:photoperiodism, flowering; P:regulation of gene silencing by RNA; P:regulation of reactive oxygen species metab…			IPR003441 (PFAM); IPR036093 (G3DSA:3.30.310.GENE3D); PTHR31989 (PANTHER); PTHR31989:SF219 (PANTHER); IPR003441 (PROSITE_PROFILES); IPR036093 (SUPERFAMILY)	P:GO:0006355; F:GO:0003677	P:regulation of transcription, DNA-templated; F:DNA binding
TRINITY_DN10046_c0_g1_i1	NADH-dependent glutamate synthase 1	3.89266e-79	10	P:GO:0006537; P:GO:0019676; P:GO:0055114; F:GO:0005506; F:GO:0010181; F:GO:0016040; F:GO:0050660; F:GO:0051538; C:GO:0005829; C:GO:0009570	P:glutamate biosynthetic process; P:ammonia assimilation cycle; P:oxidation-reduction process; F:iron ion binding; F:FMN binding; F:glutamate synthase (NADH) activity; F:flavin adenine dinucleotide binding; F:3 iron, 4 sulfur cluster binding; C:cytosol; C:chloroplast stroma	EC:1.4.1.14	Glutamate synthase (NADH)	IPR036188 (G3DSA:3.50.50.GENE3D); PTHR11938:SF131 (PANTHER); PTHR11938 (PANTHER); IPR036188 (SUPERFAMILY)	no GO terms	no GO terms
TRINITY_DN10047_c0_g1_i1	golgin Putative 5	0	3	F:GO:0005515; C:GO:0005634; C:GO:0005794	F:protein binding; C:nucleus; C:Golgi apparatus			IPR022091 (PFAM); PTHR47347 (PANTHER)	no GO terms	no GO terms
TRINITY_DN10047_c0_g1_i10	golgin Putative 5	0	3	F:GO:0005515; C:GO:0005634; C:GO:0005794	F:protein binding; C:nucleus; C:Golgi apparatus			IPR022091 (PFAM); IPR022092 (PFAM); PTHR47347 (PANTHER)	no GO terms	no GO terms
TRINITY_DN10047_c0_g1_i11	golgin Putative 5	0	3	F:GO:0005515; C:GO:0005634; C:GO:0005794	F:protein binding; C:nucleus; C:Golgi apparatus			IPR022091 (PFAM); IPR022092 (PFAM); mobidb-lite (MOBIDB_LITE); mobidb-lite (MOBIDB_LITE); mobidb-lite (MOBIDB_LITE); mobidb-lite (MOBIDB_LITE); mobidb-lite (MOBIDB_LITE); mobidb-lite (MOBIDB_LITE); mobidb-lite (MOBIDB_LITE); PTHR47347 (PANTHER)	no GO terms	no GO terms
TRINITY_DN10047_c0_g1_i12	golgin Putative 5	0	3	F:GO:0005515; C:GO:0005634; C:GO:0005794	F:protein binding; C:nucleus; C:Golgi apparatus			IPR022092 (PFAM); IPR022091 (PFAM); mobidb-lite (MOBIDB_LITE); mobidb-lite (MOBIDB_LITE); mobidb-lite (MOBIDB_LITE); mobidb-lite (MOBIDB_LITE); mobidb-lite (MOBIDB_LITE); mobidb-lite (MOBIDB_LITE); mobidb-lite (MOBIDB_LITE); mobidb-lite (MOBIDB_LITE); PTHR47347 (PANTHER)	no GO terms	no GO terms
TRINITY_DN10047_c0_g1_i13	golgin Putative 5	0	3	F:GO:0005515; C:GO:0005634; C:GO:0005794	F:protein binding; C:nucleus; C:Golgi apparatus			IPR022091 (PFAM); IPR022092 (PFAM); mobidb-lite (MOBIDB_LITE); mobidb-lite (MOBIDB_LITE); mobidb-lite (MOBIDB_LITE); mobidb-lite (MOBIDB_LITE); mobidb-lite (MOBIDB_LITE); mobidb-lite (MOBIDB_LITE); mobidb-lite (MOBIDB_LITE); PTHR47347 (PANTHER)	no GO terms	no GO terms
TRINITY_DN10047_c0_g1_i14	golgin Putative 5	0	3	F:GO:0005515; C:GO:0005634; C:GO:0005794	F:protein binding; C:nucleus; C:Golgi apparatus			IPR022092 (PFAM); IPR022091 (PFAM); mobidb-lite (MOBIDB_LITE); mobidb-lite (MOBIDB_LITE); mobidb-lite (MOBIDB_LITE); mobidb-lite (MOBIDB_LITE); mobidb-lite (MOBIDB_LITE); mobidb-lite (MOBIDB_LITE); mobidb-lite (MOBIDB_LITE); mobidb-lite (MOBIDB_LITE); PTHR47347 (PANTHER)	no GO terms	no GO terms
TRINITY_DN10047_c0_g1_i15	golgin Putative 5	0	3	F:GO:0005515; C:GO:0005634; C:GO:0005794	F:protein binding; C:nucleus; C:Golgi apparatus			IPR022091 (PFAM); IPR022092 (PFAM); mobidb-lite (MOBIDB_LITE); mobidb-lite (MOBIDB_LITE); mobidb-lite (MOBIDB_LITE); mobidb-lite (MOBIDB_LITE); mobidb-lite (MOBIDB_LITE); mobidb-lite (MOBIDB_LITE); mobidb-lite (MOBIDB_LITE); PTHR47347 (PANTHER)	no GO terms	no GO terms
TRINITY_DN10047_c0_g1_i16	golgin Putative 5	0	3	F:GO:0005515; C:GO:0005634; C:GO:0005794	F:protein binding; C:nucleus; C:Golgi apparatus			IPR022091 (PFAM); PTHR47347 (PANTHER)	no GO terms	no GO terms
TRINITY_DN10047_c0_g1_i17	golgin Putative 5	0	3	F:GO:0005515; C:GO:0005634; C:GO:0005794	F:protein binding; C:nucleus; C:Golgi apparatus			IPR022091 (PFAM); PTHR47347 (PANTHER)	no GO terms	no GO terms
TRINITY_DN10047_c0_g1_i18	golgin Putative 5	0	3	F:GO:0005515; C:GO:0005634; C:GO:0005794	F:protein binding; C:nucleus; C:Golgi apparatus			IPR022092 (PFAM); IPR022091 (PFAM); mobidb-lite (MOBIDB_LITE); mobidb-lite (MOBIDB_LITE); mobidb-lite (MOBIDB_LITE); mobidb-lite (MOBIDB_LITE); mobidb-lite (MOBIDB_LITE); mobidb-lite (MOBIDB_LITE); PTHR47347 (PANTHER)	no GO terms	no GO terms
TRINITY_DN10047_c0_g1_i19	golgin Putative 5	0	3	F:GO:0005515; C:GO:0005634; C:GO:0005794	F:protein binding; C:nucleus; C:Golgi apparatus			IPR022092 (PFAM); IPR022091 (PFAM); mobidb-lite (MOBIDB_LITE); mobidb-lite (MOBIDB_LITE); mobidb-lite (MOBIDB_LITE); mobidb-lite (MOBIDB_LITE); mobidb-lite (MOBIDB_LITE); mobidb-lite (MOBIDB_LITE); mobidb-lite (MOBIDB_LITE); PTHR47347 (PANTHER)	no GO terms	no GO terms
TRINITY_DN10047_c0_g1_i2	golgin Putative 5	0	3	F:GO:0005515; C:GO:0005634; C:GO:0005794	F:protein binding; C:nucleus; C:Golgi apparatus			IPR022091 (PFAM); IPR022092 (PFAM); PTHR47347 (PANTHER)	no GO terms	no GO terms
TRINITY_DN10047_c0_g1_i20	golgin Putative 5	0	3	F:GO:0005515; C:GO:0005634; C:GO:0005794	F:protein binding; C:nucleus; C:Golgi apparatus			IPR022091 (PFAM); IPR022092 (PFAM); PTHR47347 (PANTHER)	no GO terms	no GO terms
TRINITY_DN10047_c0_g1_i21	golgin Putative 5	1.21095e-176	3	F:GO:0005515; C:GO:0005634; C:GO:0005794	F:protein binding; C:nucleus; C:Golgi apparatus			IPR022091 (PFAM); mobidb-lite (MOBIDB_LITE); mobidb-lite (MOBIDB_LITE); PTHR47347 (PANTHER)	no GO terms	no GO terms
TRINITY_DN10047_c0_g1_i22	golgin Putative 5	0	3	F:GO:0005515; C:GO:0005634; C:GO:0005794	F:protein binding; C:nucleus; C:Golgi apparatus			IPR022092 (PFAM); IPR022091 (PFAM); mobidb-lite (MOBIDB_LITE); mobidb-lite (MOBIDB_LITE); mobidb-lite (MOBIDB_LITE); mobidb-lite (MOBIDB_LITE); mobidb-lite (MOBIDB_LITE); mobidb-lite (MOBIDB_LITE); mobidb-lite (MOBIDB_LITE); mobidb-lite (MOBIDB_LITE); PTHR47347 (PANTHER)	no GO terms	no GO terms
TRINITY_DN10047_c0_g1_i23	golgin Putative 5	2.30696e-176	3	F:GO:0005515; C:GO:0005634; C:GO:0005794	F:protein binding; C:nucleus; C:Golgi apparatus			IPR022091 (PFAM); mobidb-lite (MOBIDB_LITE); mobidb-lite (MOBIDB_LITE); PTHR47347 (PANTHER)	no GO terms	no GO terms
TRINITY_DN10047_c0_g1_i24	golgin Putative 5	0	3	F:GO:0005515; C:GO:0005634; C:GO:0005794	F:protein binding; C:nucleus; C:Golgi apparatus			IPR022092 (PFAM); IPR022091 (PFAM); mobidb-lite (MOBIDB_LITE); mobidb-lite (MOBIDB_LITE); mobidb-lite (MOBIDB_LITE); mobidb-lite (MOBIDB_LITE); mobidb-lite (MOBIDB_LITE); mobidb-lite (MOBIDB_LITE); mobidb-lite (MOBIDB_LITE); PTHR47347 (PANTHER)	no GO terms	no GO terms
TRINITY_DN10047_c0_g1_i25	golgin Putative 5	0	3	F:GO:0005515; C:GO:0005634; C:GO:0005794	F:protein binding; C:nucleus; C:Golgi apparatus			IPR022091 (PFAM); IPR022092 (PFAM); mobidb-lite (MOBIDB_LITE); mobidb-lite (MOBIDB_LITE); mobidb-lite (MOBIDB_LITE); mobidb-lite (MOBIDB_LITE); mobidb-lite (MOBIDB_LITE); mobidb-lite (MOBIDB_LITE); mobidb-lite (MOBIDB_LITE); mobidb-lite (MOBIDB_LITE); mobidb-lite (MOBIDB_LITE); PTHR47347 (PANTHER)	no GO terms	no GO terms
TRINITY_DN10047_c0_g1_i3	golgin Putative 5	0	3	F:GO:0005515; C:GO:0005634; C:GO:0005794	F:protein binding; C:nucleus; C:Golgi apparatus			IPR022092 (PFAM); IPR022091 (PFAM); mobidb-lite (MOBIDB_LITE); mobidb-lite (MOBIDB_LITE); mobidb-lite (MOBIDB_LITE); mobidb-lite (MOBIDB_LITE); mobidb-lite (MOBIDB_LITE); mobidb-lite (MOBIDB_LITE); mobidb-lite (MOBIDB_LITE); PTHR47347 (PANTHER)	no GO terms	no GO terms
TRINITY_DN10047_c0_g1_i4	golgin Putative 5	0	3	F:GO:0005515; C:GO:0005634; C:GO:0005794	F:protein binding; C:nucleus; C:Golgi apparatus			IPR022091 (PFAM); PTHR47347 (PANTHER)	no GO terms	no GO terms
TRINITY_DN10047_c0_g1_i5	golgin Putative 5	0	3	F:GO:0005515; C:GO:0005634; C:GO:0005794	F:protein binding; C:nucleus; C:Golgi apparatus			IPR022091 (PFAM); PTHR47347 (PANTHER)	no GO terms	no GO terms
TRINITY_DN10047_c0_g1_i6	golgin Putative 5	0	3	F:GO:0005515; C:GO:0005634; C:GO:0005794	F:protein binding; C:nucleus; C:Golgi apparatus			IPR022091 (PFAM); IPR022092 (PFAM); mobidb-lite (MOBIDB_LITE); mobidb-lite (MOBIDB_LITE); mobidb-lite (MOBIDB_LITE); mobidb-lite (MOBIDB_LITE); mobidb-lite (MOBIDB_LITE); mobidb-lite (MOBIDB_LITE); mobidb-lite (MOBIDB_LITE); PTHR47347 (PANTHER)	no GO terms	no GO terms
TRINITY_DN10047_c0_g1_i7	golgin Putative 5	0	3	F:GO:0005515; C:GO:0005634; C:GO:0005794	F:protein binding; C:nucleus; C:Golgi apparatus			IPR022091 (PFAM); PTHR47347 (PANTHER)	no GO terms	no GO terms
TRINITY_DN10047_c0_g1_i8	golgin Putative 5	0	3	F:GO:0005515; C:GO:0005634; C:GO:0005794	F:protein binding; C:nucleus; C:Golgi apparatus			IPR022092 (PFAM); IPR022091 (PFAM); mobidb-lite (MOBIDB_LITE); mobidb-lite (MOBIDB_LITE); mobidb-lite (MOBIDB_LITE); mobidb-lite (MOBIDB_LITE); mobidb-lite (MOBIDB_LITE); mobidb-lite (MOBIDB_LITE); mobidb-lite (MOBIDB_LITE); PTHR47347 (PANTHER)	no GO terms	no GO terms
TRINITY_DN10047_c0_g1_i9	golgin Putative 5	8.26357e-172	3	F:GO:0005515; C:GO:0005634; C:GO:0005794	F:protein binding; C:nucleus; C:Golgi apparatus			IPR022091 (PFAM); mobidb-lite (MOBIDB_LITE); mobidb-lite (MOBIDB_LITE); PTHR47347 (PANTHER)	no GO terms	no GO terms
TRINITY_DN10048_c0_g1_i1	S uncoupled 1	0	8	P:GO:0006417; P:GO:0009658; P:GO:0010239; F:GO:0003727; F:GO:0005515; C:GO:0009534; C:GO:0042644; C:GO:0042651	P:regulation of translation; P:chloroplast organization; P:chloroplast mRNA processing; F:single-stranded RNA binding; F:protein binding; C:chloroplast thylakoid; C:chloroplast nucleoid; C:thylakoid membrane			IPR002885 (TIGRFAM); IPR011990 (G3DSA:1.25.40.GENE3D); IPR011990 (G3DSA:1.25.40.GENE3D); IPR002885 (PFAM); IPR011990 (G3DSA:1.25.40.GENE3D); IPR002885 (PFAM); IPR002885 (PFAM); PTHR46128 (PANTHER); IPR002885 (PROSITE_PROFILES); IPR002885 (PROSITE_PROFILES); IPR002885 (PROSITE_PROFILES); IPR002885 (PROSITE_PROFILES); IPR002885 (PROSITE_PROFILES); IPR002885 (PROSITE_PROFILES); IPR002885 (PROSITE_PR…	F:GO:0005515	F:protein binding
TRINITY_DN10048_c0_g1_i2	Tetratricopeptide repeat (TPR)-like superfamily protein	1.11324e-34	6	P:GO:0009658; P:GO:0010239; F:GO:0003727; F:GO:0005515; C:GO:0042644; C:GO:0042651	P:chloroplast organization; P:chloroplast mRNA processing; F:single-stranded RNA binding; F:protein binding; C:chloroplast nucleoid; C:thylakoid membrane			no IPS match	no IPS match	no IPS match
TRINITY_DN10048_c0_g1_i3	pentatricopeptide repeat-containing protein At5g42310, mitochondrial	0	8	P:GO:0006417; P:GO:0009658; P:GO:0010239; F:GO:0003727; F:GO:0005515; C:GO:0009534; C:GO:0042644; C:GO:0042651	P:regulation of translation; P:chloroplast organization; P:chloroplast mRNA processing; F:single-stranded RNA binding; F:protein binding; C:chloroplast thylakoid; C:chloroplast nucleoid; C:thylakoid membrane			IPR002885 (PFAM); IPR011990 (G3DSA:1.25.40.GENE3D); IPR011990 (G3DSA:1.25.40.GENE3D); IPR011990 (G3DSA:1.25.40.GENE3D); IPR002885 (PFAM); IPR002885 (PFAM); IPR002885 (TIGRFAM); PTHR46128 (PANTHER); IPR002885 (PROSITE_PROFILES); IPR002885 (PROSITE_PROFILES); IPR002885 (PROSITE_PROFILES); IPR002885 (PROSITE_PROFILES); IPR002885 (PROSITE_PROFILES); IPR002885 (PROSITE_PROFILES); IPR002885 (PROSITE_PR…	F:GO:0005515	F:protein binding
TRINITY_DN10048_c0_g1_i4	pentatricopeptide repeat-containing protein At5g42310, mitochondrial	1.81475e-13	8	P:GO:0006417; P:GO:0009658; P:GO:0010239; F:GO:0003727; F:GO:0005515; C:GO:0009534; C:GO:0042644; C:GO:0042651	P:regulation of translation; P:chloroplast organization; P:chloroplast mRNA processing; F:single-stranded RNA binding; F:protein binding; C:chloroplast thylakoid; C:chloroplast nucleoid; C:thylakoid membrane			no IPS match	no IPS match	no IPS match
TRINITY_DN10048_c0_g1_i5	pentatricopeptide repeat-containing protein At5g42310, mitochondrial	0	8	P:GO:0006417; P:GO:0009658; P:GO:0010239; F:GO:0003727; F:GO:0005515; C:GO:0009534; C:GO:0042644; C:GO:0042651	P:regulation of translation; P:chloroplast organization; P:chloroplast mRNA processing; F:single-stranded RNA binding; F:protein binding; C:chloroplast thylakoid; C:chloroplast nucleoid; C:thylakoid membrane			IPR011990 (G3DSA:1.25.40.GENE3D); IPR002885 (PFAM); IPR002885 (PFAM); IPR011990 (G3DSA:1.25.40.GENE3D); IPR002885 (TIGRFAM); IPR002885 (PFAM); PTHR46128:SF10 (PANTHER); PTHR46128 (PANTHER); PTHR46128:SF10 (PANTHER); PTHR46128:SF10 (PANTHER); PTHR46128 (PANTHER); PTHR46128 (PANTHER); IPR002885 (PROSITE_PROFILES); IPR002885 (PROSITE_PROFILES); IPR002885 (PROSITE_PROFILES); IPR002885 (PROSITE_PROFIL…	F:GO:0005515	F:protein binding
TRINITY_DN10048_c0_g1_i6	pentatricopeptide repeat-containing protein At5g42310, mitochondrial	0	8	P:GO:0006417; P:GO:0009658; P:GO:0010239; F:GO:0003727; F:GO:0005515; C:GO:0009534; C:GO:0042644; C:GO:0042651	P:regulation of translation; P:chloroplast organization; P:chloroplast mRNA processing; F:single-stranded RNA binding; F:protein binding; C:chloroplast thylakoid; C:chloroplast nucleoid; C:thylakoid membrane			IPR002885 (PFAM); IPR011990 (G3DSA:1.25.40.GENE3D); IPR011990 (G3DSA:1.25.40.GENE3D); IPR011990 (G3DSA:1.25.40.GENE3D); IPR002885 (PFAM); IPR002885 (PFAM); IPR002885 (TIGRFAM); PTHR46128 (PANTHER); IPR002885 (PROSITE_PROFILES); IPR002885 (PROSITE_PROFILES); IPR002885 (PROSITE_PROFILES); IPR002885 (PROSITE_PROFILES); IPR002885 (PROSITE_PROFILES); IPR002885 (PROSITE_PROFILES); IPR002885 (PROSITE_PR…	F:GO:0005515	F:protein binding
TRINITY_DN10048_c0_g1_i7	pentatricopeptide repeat-containing protein At5g42310, mitochondrial	0	8	P:GO:0006417; P:GO:0009658; P:GO:0010239; F:GO:0003727; F:GO:0005515; C:GO:0009534; C:GO:0042644; C:GO:0042651	P:regulation of translation; P:chloroplast organization; P:chloroplast mRNA processing; F:single-stranded RNA binding; F:protein binding; C:chloroplast thylakoid; C:chloroplast nucleoid; C:thylakoid membrane			IPR002885 (PFAM); IPR011990 (G3DSA:1.25.40.GENE3D); IPR011990 (G3DSA:1.25.40.GENE3D); IPR011990 (G3DSA:1.25.40.GENE3D); IPR002885 (PFAM); IPR002885 (PFAM); IPR002885 (TIGRFAM); PTHR46128 (PANTHER); IPR002885 (PROSITE_PROFILES); IPR002885 (PROSITE_PROFILES); IPR002885 (PROSITE_PROFILES); IPR002885 (PROSITE_PROFILES); IPR002885 (PROSITE_PROFILES); IPR002885 (PROSITE_PROFILES); IPR002885 (PROSITE_PR…	F:GO:0005515	F:protein binding
TRINITY_DN10048_c0_g1_i8	Pentatricopeptide repeat (PPR-like) superfamily protein	2.53322e-162	8	P:GO:0006417; P:GO:0009658; P:GO:0010239; F:GO:0003727; F:GO:0005515; C:GO:0009534; C:GO:0042644; C:GO:0042651	P:regulation of translation; P:chloroplast organization; P:chloroplast mRNA processing; F:single-stranded RNA binding; F:protein binding; C:chloroplast thylakoid; C:chloroplast nucleoid; C:thylakoid membrane			IPR002885 (PFAM); IPR011990 (G3DSA:1.25.40.GENE3D); IPR002885 (TIGRFAM); IPR002885 (PFAM); IPR002885 (PFAM); IPR002885 (PFAM); IPR011990 (G3DSA:1.25.40.GENE3D); PTHR46128 (PANTHER); IPR002885 (PROSITE_PROFILES); IPR002885 (PROSITE_PROFILES); IPR002885 (PROSITE_PROFILES); IPR002885 (PROSITE_PROFILES); IPR002885 (PROSITE_PROFILES); IPR002885 (PROSITE_PROFILES); IPR002885 (PROSITE_PROFILES)	F:GO:0005515	F:protein binding
TRINITY_DN10049_c0_g1_i1	HYPERSENSITIVE TO ABA1	1.19936e-73	7	P:GO:0006470; P:GO:0050794; F:GO:0004724; F:GO:0005515; F:GO:0046872; C:GO:0005634; C:GO:0005829	P:protein dephosphorylation; P:regulation of cellular process; F:magnesium-dependent protein serine/threonine phosphatase activity; F:protein binding; F:metal ion binding; C:nucleus; C:cytosol	EC:3.1.3.16	Protein-serine/threonine phosphatase	PTHR13832:SF639 (PANTHER); IPR015655 (PANTHER)	P:GO:0006470; F:GO:0004722	P:protein dephosphorylation; F:protein serine/threonine phosphatase activity
TRINITY_DN10049_c0_g2_i1	HYPERSENSITIVE TO ABA1	3.16193e-44	6	P:GO:0006470; F:GO:0004724; F:GO:0005515; F:GO:0046872; C:GO:0005634; C:GO:0005829	P:protein dephosphorylation; F:magnesium-dependent protein serine/threonine phosphatase activity; F:protein binding; F:metal ion binding; C:nucleus; C:cytosol	EC:3.1.3.16	Protein-serine/threonine phosphatase	no IPS match	no IPS match	no IPS match
TRINITY_DN1005_c0_g1_i1	UDP-XYL synthase 6	0	6	P:GO:0033320; P:GO:0042732; F:GO:0048040; F:GO:0070403; C:GO:0005829; C:GO:0005886	P:UDP-D-xylose biosynthetic process; P:D-xylose metabolic process; F:UDP-glucuronate decarboxylase activity; F:NAD+ binding; C:cytosol; C:plasma membrane	EC:4.1.1.35	UDP-glucuronate decarboxylase	G3DSA:3.90.25.10 (GENE3D); IPR016040 (PFAM); G3DSA:3.40.50.720 (GENE3D); mobidb-lite (MOBIDB_LITE); mobidb-lite (MOBIDB_LITE); PTHR43078:SF20 (PANTHER); PTHR43078 (PANTHER); cd05230 (CDD); IPR036291 (SUPERFAMILY)	no GO terms	no GO terms
TRINITY_DN1005_c0_g1_i10	UDP-XYL synthase 6	0	6	P:GO:0033320; P:GO:0042732; F:GO:0048040; F:GO:0070403; C:GO:0005829; C:GO:0005886	P:UDP-D-xylose biosynthetic process; P:D-xylose metabolic process; F:UDP-glucuronate decarboxylase activity; F:NAD+ binding; C:cytosol; C:plasma membrane	EC:4.1.1.35	UDP-glucuronate decarboxylase	IPR016040 (PFAM); G3DSA:3.90.25.10 (GENE3D); G3DSA:3.40.50.720 (GENE3D); mobidb-lite (MOBIDB_LITE); mobidb-lite (MOBIDB_LITE); PTHR43078 (PANTHER); PTHR43078:SF20 (PANTHER); cd05230 (CDD); IPR036291 (SUPERFAMILY)	no GO terms	no GO terms
TRINITY_DN1005_c0_g1_i11	UDP-XYL synthase 6	0	6	P:GO:0033320; P:GO:0042732; F:GO:0048040; F:GO:0070403; C:GO:0005829; C:GO:0005886	P:UDP-D-xylose biosynthetic process; P:D-xylose metabolic process; F:UDP-glucuronate decarboxylase activity; F:NAD+ binding; C:cytosol; C:plasma membrane	EC:4.1.1.35	UDP-glucuronate decarboxylase	IPR016040 (PFAM); G3DSA:3.90.25.10 (GENE3D); G3DSA:3.40.50.720 (GENE3D); mobidb-lite (MOBIDB_LITE); mobidb-lite (MOBIDB_LITE); PTHR43078 (PANTHER); PTHR43078:SF20 (PANTHER); cd05230 (CDD); IPR036291 (SUPERFAMILY)	no GO terms	no GO terms
TRINITY_DN1005_c0_g1_i2	UDP-XYL synthase 6	3.02342e-141	6	P:GO:0033320; P:GO:0042732; F:GO:0048040; F:GO:0070403; C:GO:0005829; C:GO:0005886	P:UDP-D-xylose biosynthetic process; P:D-xylose metabolic process; F:UDP-glucuronate decarboxylase activity; F:NAD+ binding; C:cytosol; C:plasma membrane	EC:4.1.1.35	UDP-glucuronate decarboxylase	IPR016040 (PFAM); G3DSA:3.40.50.720 (GENE3D); PTHR43078 (PANTHER); PTHR43078:SF20 (PANTHER); IPR036291 (SUPERFAMILY)	no GO terms	no GO terms
TRINITY_DN1005_c0_g1_i3	UDP-XYL synthase 6	0	6	P:GO:0033320; P:GO:0042732; F:GO:0048040; F:GO:0070403; C:GO:0005829; C:GO:0005886	P:UDP-D-xylose biosynthetic process; P:D-xylose metabolic process; F:UDP-glucuronate decarboxylase activity; F:NAD+ binding; C:cytosol; C:plasma membrane	EC:4.1.1.35	UDP-glucuronate decarboxylase	G3DSA:3.40.50.720 (GENE3D); G3DSA:3.90.25.10 (GENE3D); IPR016040 (PFAM); mobidb-lite (MOBIDB_LITE); PTHR43078 (PANTHER); PTHR43078:SF13 (PANTHER); cd05230 (CDD); IPR036291 (SUPERFAMILY)	no GO terms	no GO terms
TRINITY_DN1005_c0_g1_i4	UDP-XYL synthase 6	0	6	P:GO:0033320; P:GO:0042732; F:GO:0048040; F:GO:0070403; C:GO:0005829; C:GO:0005886	P:UDP-D-xylose biosynthetic process; P:D-xylose metabolic process; F:UDP-glucuronate decarboxylase activity; F:NAD+ binding; C:cytosol; C:plasma membrane	EC:4.1.1.35	UDP-glucuronate decarboxylase	G3DSA:3.40.50.720 (GENE3D); G3DSA:3.90.25.10 (GENE3D); IPR016040 (PFAM); mobidb-lite (MOBIDB_LITE); PTHR43078 (PANTHER); PTHR43078:SF13 (PANTHER); cd05230 (CDD); IPR036291 (SUPERFAMILY)	no GO terms	no GO terms
TRINITY_DN1005_c0_g1_i5	UDP-XYL synthase 6	0	6	P:GO:0033320; P:GO:0042732; F:GO:0048040; F:GO:0070403; C:GO:0005829; C:GO:0005886	P:UDP-D-xylose biosynthetic process; P:D-xylose metabolic process; F:UDP-glucuronate decarboxylase activity; F:NAD+ binding; C:cytosol; C:plasma membrane	EC:4.1.1.35	UDP-glucuronate decarboxylase	G3DSA:3.90.25.10 (GENE3D); IPR016040 (PFAM); G3DSA:3.40.50.720 (GENE3D); mobidb-lite (MOBIDB_LITE); mobidb-lite (MOBIDB_LITE); PTHR43078:SF20 (PANTHER); PTHR43078 (PANTHER); cd05230 (CDD); IPR036291 (SUPERFAMILY)	no GO terms	no GO terms
TRINITY_DN1005_c0_g1_i6	UDP-XYL synthase 6	0	6	P:GO:0033320; P:GO:0042732; F:GO:0048040; F:GO:0070403; C:GO:0005829; C:GO:0005886	P:UDP-D-xylose biosynthetic process; P:D-xylose metabolic process; F:UDP-glucuronate decarboxylase activity; F:NAD+ binding; C:cytosol; C:plasma membrane	EC:4.1.1.35	UDP-glucuronate decarboxylase	G3DSA:3.40.50.720 (GENE3D); G3DSA:3.90.25.10 (GENE3D); IPR016040 (PFAM); mobidb-lite (MOBIDB_LITE); PTHR43078 (PANTHER); PTHR43078:SF13 (PANTHER); cd05230 (CDD); IPR036291 (SUPERFAMILY)	no GO terms	no GO terms
TRINITY_DN1005_c0_g1_i7	UDP-XYL synthase 6	0	6	P:GO:0033320; P:GO:0042732; F:GO:0048040; F:GO:0070403; C:GO:0005829; C:GO:0005886	P:UDP-D-xylose biosynthetic process; P:D-xylose metabolic process; F:UDP-glucuronate decarboxylase activity; F:NAD+ binding; C:cytosol; C:plasma membrane	EC:4.1.1.35	UDP-glucuronate decarboxylase	IPR016040 (PFAM); G3DSA:3.90.25.10 (GENE3D); G3DSA:3.40.50.720 (GENE3D); mobidb-lite (MOBIDB_LITE); mobidb-lite (MOBIDB_LITE); PTHR43078 (PANTHER); PTHR43078:SF20 (PANTHER); cd05230 (CDD); IPR036291 (SUPERFAMILY)	no GO terms	no GO terms
TRINITY_DN1005_c0_g1_i8	UDP-XYL synthase 6	0	6	P:GO:0033320; P:GO:0042732; F:GO:0048040; F:GO:0070403; C:GO:0005829; C:GO:0005886	P:UDP-D-xylose biosynthetic process; P:D-xylose metabolic process; F:UDP-glucuronate decarboxylase activity; F:NAD+ binding; C:cytosol; C:plasma membrane	EC:4.1.1.35	UDP-glucuronate decarboxylase	G3DSA:3.40.50.720 (GENE3D); G3DSA:3.90.25.10 (GENE3D); IPR016040 (PFAM); mobidb-lite (MOBIDB_LITE); PTHR43078 (PANTHER); PTHR43078:SF13 (PANTHER); cd05230 (CDD); IPR036291 (SUPERFAMILY)	no GO terms	no GO terms
TRINITY_DN1005_c0_g1_i9	UDP-XYL synthase 6	0	6	P:GO:0033320; P:GO:0042732; F:GO:0048040; F:GO:0070403; C:GO:0005829; C:GO:0005886	P:UDP-D-xylose biosynthetic process; P:D-xylose metabolic process; F:UDP-glucuronate decarboxylase activity; F:NAD+ binding; C:cytosol; C:plasma membrane	EC:4.1.1.35	UDP-glucuronate decarboxylase	IPR016040 (PFAM); G3DSA:3.90.25.10 (GENE3D); G3DSA:3.40.50.720 (GENE3D); mobidb-lite (MOBIDB_LITE); mobidb-lite (MOBIDB_LITE); PTHR43078 (PANTHER); PTHR43078:SF20 (PANTHER); cd05230 (CDD); IPR036291 (SUPERFAMILY)	no GO terms	no GO terms
TRINITY_DN1005_c2_g1_i1	---NA---							no IPS match	no IPS match	no IPS match
TRINITY_DN10050_c0_g1_i1	calcium-dependent lipid-binding family protein	7.35196e-158	4	P:GO:0006623; P:GO:0045053; C:GO:0005623; C:GO:0019898	P:protein targeting to vacuole; P:protein retention in Golgi apparatus; C:obsolete cell; C:extrinsic component of membrane			IPR009291 (PFAM); IPR026847 (PANTHER); PTHR16166:SF114 (PANTHER)	no GO terms	no GO terms
TRINITY_DN10051_c0_g1_i1	pyruvate kinase	6.83668e-99	11	P:GO:0006096; P:GO:0006633; P:GO:0010431; P:GO:0046686; F:GO:0000287; F:GO:0004743; F:GO:0005524; F:GO:0016301; F:GO:0030955; C:GO:0005739; C:GO:0009570	P:glycolytic process; P:fatty acid biosynthetic process; P:seed maturation; P:response to cadmium ion; F:magnesium ion binding; F:pyruvate kinase activity; F:ATP binding; F:kinase activity; F:potassium ion binding; C:mitochondrion; C:chloroplast stroma	EC:2.7.1.40	Pyruvate kinase	IPR001697 (PRINTS); IPR015793 (PFAM); IPR040442 (G3DSA:3.20.20.GENE3D); PTHR11817:SF2 (PANTHER); IPR001697 (PANTHER); IPR015813 (SUPERFAMILY)	P:GO:0006096; F:GO:0000287; F:GO:0003824; F:GO:0004743; F:GO:0030955	P:glycolytic process; F:magnesium ion binding; F:catalytic activity; F:pyruvate kinase activity; F:potassium ion binding
TRINITY_DN10052_c0_g1_i1	Acyl transferase/acyl hydrolase/lysophospholipase superfamily protein	0	7	P:GO:0019433; P:GO:0055088; F:GO:0004806; F:GO:0016740; C:GO:0005737; C:GO:0005811; C:GO:0016020	P:triglyceride catabolic process; P:lipid homeostasis; F:triglyceride lipase activity; F:transferase activity; C:cytoplasm; C:lipid droplet; C:membrane	EC:3.1.1.1; EC:3.1.1.3	Carboxylesterase; Triacylglycerol lipase	G3DSA:3.40.1090.10 (GENE3D); IPR002641 (PFAM); PTHR12406:SF7 (PANTHER); IPR033562 (PANTHER); IPR002641 (PROSITE_PROFILES); cd07224 (CDD); IPR016035 (SUPERFAMILY)	P:GO:0006629; P:GO:0016042; F:GO:0016787	P:lipid metabolic process; P:lipid catabolic process; F:hydrolase activity
TRINITY_DN10052_c0_g1_i2	Acyl transferase/acyl hydrolase/lysophospholipase superfamily protein	0	7	P:GO:0019433; P:GO:0055088; F:GO:0004806; F:GO:0016740; C:GO:0005737; C:GO:0005811; C:GO:0016020	P:triglyceride catabolic process; P:lipid homeostasis; F:triglyceride lipase activity; F:transferase activity; C:cytoplasm; C:lipid droplet; C:membrane	EC:3.1.1.1; EC:3.1.1.3	Carboxylesterase; Triacylglycerol lipase	IPR002641 (PFAM); G3DSA:3.40.1090.10 (GENE3D); mobidb-lite (MOBIDB_LITE); mobidb-lite (MOBIDB_LITE); PTHR12406:SF7 (PANTHER); IPR033562 (PANTHER); IPR002641 (PROSITE_PROFILES); cd07224 (CDD); IPR016035 (SUPERFAMILY)	P:GO:0006629; P:GO:0016042; F:GO:0016787	P:lipid metabolic process; P:lipid catabolic process; F:hydrolase activity
TRINITY_DN10053_c0_g1_i1	Class II aaRS and biotin synthetases superfamily protein	3.2197e-41	10	P:GO:0006433; P:GO:0009553; P:GO:0010109; P:GO:0048316; P:GO:0048481; F:GO:0004827; F:GO:0005524; C:GO:0005739; C:GO:0009570; C:GO:0017101	P:prolyl-tRNA aminoacylation; P:embryo sac development; P:regulation of photosynthesis; P:seed development; P:plant ovule development; F:proline-tRNA ligase activity; F:ATP binding; C:mitochondrion; C:chloroplast stroma; C:aminoacyl-tRNA synthetase multienzyme complex	EC:6.1.1.15	Proline--tRNA ligase	mobidb-lite (MOBIDB_LITE); mobidb-lite (MOBIDB_LITE)	no GO terms	no GO terms
TRINITY_DN10053_c0_g2_i1	proline--tRNA ligase, cytoplasmic-like isoform X10	1.48266e-77	10	P:GO:0006433; P:GO:0009553; P:GO:0010109; P:GO:0048316; P:GO:0048481; F:GO:0004827; F:GO:0005524; C:GO:0005739; C:GO:0009570; C:GO:0017101	P:prolyl-tRNA aminoacylation; P:embryo sac development; P:regulation of photosynthesis; P:seed development; P:plant ovule development; F:proline-tRNA ligase activity; F:ATP binding; C:mitochondrion; C:chloroplast stroma; C:aminoacyl-tRNA synthetase multienzyme complex	EC:6.1.1.15	Proline--tRNA ligase	G3DSA:3.30.930.10 (GENE3D); mobidb-lite (MOBIDB_LITE); PTHR43382 (PANTHER); PTHR43382:SF3 (PANTHER); SSF55681 (SUPERFAMILY)	no GO terms	no GO terms
TRINITY_DN10054_c0_g1_i1	---NA---							no IPS match	no IPS match	no IPS match
TRINITY_DN10055_c0_g1_i1	---NA---							no IPS match	no IPS match	no IPS match
TRINITY_DN10055_c0_g2_i1	Endosomal targeting BRO1-like domain-containing protein	0	1	C:GO:0016021	C:integral component of membrane			IPR004328 (PFAM); IPR038499 (G3DSA:1.25.40.GENE3D); IPR038898 (PANTHER); PTHR23032:SF9 (PANTHER); IPR004328 (PROSITE_PROFILES); cd09034 (CDD)	no GO terms	no GO terms
TRINITY_DN10055_c0_g2_i2	Endosomal targeting BRO1-like domain-containing protein	0	1	C:GO:0016021	C:integral component of membrane			IPR004328 (PFAM); IPR038499 (G3DSA:1.25.40.GENE3D); IPR038898 (PANTHER); PTHR23032:SF9 (PANTHER); IPR004328 (PROSITE_PROFILES); cd09034 (CDD)	no GO terms	no GO terms
TRINITY_DN10055_c1_g1_i1	---NA---							no IPS match	no IPS match	no IPS match
TRINITY_DN10056_c0_g1_i2	Embryo defective 2410 isoform 1	2.15573e-110	4	P:GO:0009306; P:GO:0009660; C:GO:0005887; C:GO:0009501	P:protein secretion; P:amyloplast organization; C:integral component of plasma membrane; C:amyloplast			PTHR34457 (PANTHER)	no GO terms	no GO terms
TRINITY_DN10056_c0_g1_i3	Embryo defective 2410 isoform 1	3.29004e-111	4	P:GO:0009306; P:GO:0009660; C:GO:0005887; C:GO:0009501	P:protein secretion; P:amyloplast organization; C:integral component of plasma membrane; C:amyloplast			PTHR34457 (PANTHER)	no GO terms	no GO terms
TRINITY_DN10056_c0_g1_i4	Embryo defective 2410 isoform 1	4.25447e-111	4	P:GO:0009306; P:GO:0009660; C:GO:0005887; C:GO:0009501	P:protein secretion; P:amyloplast organization; C:integral component of plasma membrane; C:amyloplast			PTHR34457 (PANTHER)	no GO terms	no GO terms
TRINITY_DN10057_c0_g1_i1	BEL1-like homeodomain protein 6 isoform X1	1.60266e-42	3	P:GO:0006355; F:GO:0003677; C:GO:0005634	P:regulation of transcription, DNA-templated; F:DNA binding; C:nucleus			PTHR11850 (PANTHER); PTHR11850:SF245 (PANTHER)	no GO terms	no GO terms
TRINITY_DN10057_c0_g1_i2	---NA---							no IPS match	no IPS match	no IPS match
TRINITY_DN10057_c0_g1_i3	BEL1-like homeodomain protein 6 isoform X1	1.15879e-44	3	P:GO:0006355; F:GO:0003677; C:GO:0005634	P:regulation of transcription, DNA-templated; F:DNA binding; C:nucleus			PTHR11850 (PANTHER); PTHR11850:SF245 (PANTHER)	no GO terms	no GO terms
TRINITY_DN10057_c0_g2_i1	BEL1-like homeodomain protein 6 isoform X1	3.22845e-95	3	P:GO:0006355; F:GO:0003677; C:GO:0005634	P:regulation of transcription, DNA-templated; F:DNA binding; C:nucleus			mobidb-lite (MOBIDB_LITE); PTHR11850 (PANTHER); PTHR11850:SF245 (PANTHER)	no GO terms	no GO terms
TRINITY_DN10057_c0_g2_i2	BEL1-like homeodomain protein 6 isoform X1	5.90115e-121	3	P:GO:0006355; F:GO:0003677; C:GO:0005634	P:regulation of transcription, DNA-templated; F:DNA binding; C:nucleus			mobidb-lite (MOBIDB_LITE); mobidb-lite (MOBIDB_LITE); mobidb-lite (MOBIDB_LITE); PTHR11850 (PANTHER); PTHR11850:SF245 (PANTHER)	no GO terms	no GO terms
TRINITY_DN10057_c0_g2_i3	BEL1-like homeodomain protein 6 isoform X1	5.46489e-121	3	P:GO:0006355; F:GO:0003677; C:GO:0005634	P:regulation of transcription, DNA-templated; F:DNA binding; C:nucleus			mobidb-lite (MOBIDB_LITE); mobidb-lite (MOBIDB_LITE); mobidb-lite (MOBIDB_LITE); PTHR11850 (PANTHER); PTHR11850:SF245 (PANTHER)	no GO terms	no GO terms
TRINITY_DN10057_c0_g2_i4	BEL1-like homeodomain protein 6 isoform X1	3.48496e-95	3	P:GO:0006355; F:GO:0003677; C:GO:0005634	P:regulation of transcription, DNA-templated; F:DNA binding; C:nucleus			mobidb-lite (MOBIDB_LITE); PTHR11850 (PANTHER); PTHR11850:SF245 (PANTHER)	no GO terms	no GO terms
TRINITY_DN10057_c0_g3_i1	---NA---							no IPS match	no IPS match	no IPS match
TRINITY_DN10058_c0_g1_i1	Small nuclear ribonucleoprotein family protein	8.80095e-25	9	P:GO:0000290; P:GO:0006397; P:GO:0009414; P:GO:0009631; P:GO:0042538; F:GO:0000339; F:GO:0005515; C:GO:0000932; C:GO:1990726	P:deadenylation-dependent decapping of nuclear-transcribed mRNA; P:mRNA processing; P:response to water deprivation; P:cold acclimation; P:hyperosmotic salinity response; F:RNA cap binding; F:protein binding; C:P-body; C:Lsm1-7-Pat1 complex			G3DSA:2.30.30.100 (GENE3D); IPR001163 (PFAM); PTHR15588 (PANTHER); PTHR15588:SF14 (PANTHER); IPR034104 (CDD); IPR010920 (SUPERFAMILY)	P:GO:0000956	P:nuclear-transcribed mRNA catabolic process
TRINITY_DN10058_c0_g2_i1	---NA---							no IPS match	no IPS match	no IPS match
TRINITY_DN10058_c0_g3_i1	Small nuclear ribonucleoprotein family protein	2.44688e-39	9	P:GO:0000290; P:GO:0006397; P:GO:0009414; P:GO:0009631; P:GO:0042538; F:GO:0000339; F:GO:0005515; C:GO:0000932; C:GO:1990726	P:deadenylation-dependent decapping of nuclear-transcribed mRNA; P:mRNA processing; P:response to water deprivation; P:cold acclimation; P:hyperosmotic salinity response; F:RNA cap binding; F:protein binding; C:P-body; C:Lsm1-7-Pat1 complex			IPR001163 (PFAM); G3DSA:2.30.30.100 (GENE3D); PTHR15588:SF11 (PANTHER); PTHR15588 (PANTHER); IPR034104 (CDD); IPR010920 (SUPERFAMILY)	P:GO:0000956	P:nuclear-transcribed mRNA catabolic process
TRINITY_DN10058_c0_g4_i1	regulatory-associated protein of TOR 2 (RAPTOR2)	7.68134e-76	13	P:GO:0008361; P:GO:0009267; P:GO:0009793; P:GO:0010492; P:GO:0010507; P:GO:0030307; P:GO:0031929; P:GO:0071230; P:GO:0071902; F:GO:0019900; F:GO:0030674; C:GO:0005737; C:GO:0031931	P:regulation of cell size; P:cellular response to starvation; P:embryo development ending in seed dormancy; P:maintenance of shoot apical meristem identity; P:negative regulation of autophagy; P:positive regulation of cell growth; P:TOR signaling; P:cellular response to amino acid stimulus; P:positive regulation of protein serine/threonine kinase activity; F:kinase binding; F:protein-macromolecul…			IPR029347 (PFAM); IPR004083 (PANTHER); PTHR12848:SF17 (PANTHER)	P:GO:0031929; C:GO:0031931	P:TOR signaling; C:TORC1 complex
TRINITY_DN10058_c1_g1_i1	Uncharacterized protein TCM_022393	3.20604e-12						no IPS match	no IPS match	no IPS match
TRINITY_DN10058_c2_g1_i1	---NA---							no IPS match	no IPS match	no IPS match
TRINITY_DN10059_c0_g1_i1	PLATZ transcription factor family protein	4.42867e-120	4	P:GO:0010150; F:GO:0005515; F:GO:0008270; C:GO:0005634	P:leaf senescence; F:protein binding; F:zinc ion binding; C:nucleus			IPR006734 (PFAM); PTHR31065 (PANTHER); PTHR31065:SF11 (PANTHER); IPR000315 (PROSITE_PROFILES)	F:GO:0008270	F:zinc ion binding
TRINITY_DN10059_c0_g1_i2	PLATZ transcription factor family protein	9.32516e-59	2	F:GO:0005515; F:GO:0008270	F:protein binding; F:zinc ion binding			mobidb-lite (MOBIDB_LITE); mobidb-lite (MOBIDB_LITE); mobidb-lite (MOBIDB_LITE); PTHR31065:SF11 (PANTHER); PTHR31065 (PANTHER)	no GO terms	no GO terms
TRINITY_DN10059_c0_g1_i3	PLATZ transcription factor family protein	3.73747e-54	2	F:GO:0005515; F:GO:0008270	F:protein binding; F:zinc ion binding			mobidb-lite (MOBIDB_LITE); mobidb-lite (MOBIDB_LITE); mobidb-lite (MOBIDB_LITE); PTHR31065:SF11 (PANTHER); PTHR31065 (PANTHER)	no GO terms	no GO terms
TRINITY_DN1006_c0_g1_i1	TEOSINTE BRANCHED 1, cycloidea, PCF (TCP)-domain family protein 20	1.71797e-166	16	P:GO:0006355; P:GO:0007623; P:GO:0008361; P:GO:0009653; P:GO:0009735; P:GO:0010229; P:GO:0010252; P:GO:0031540; P:GO:0042023; P:GO:0048467; P:GO:0051301; P:GO:1900056; F:GO:0000987; F:GO:0003700; F:GO:0005515; C:GO:0005634	P:regulation of transcription, DNA-templated; P:circadian rhythm; P:regulation of cell size; P:anatomical structure morphogenesis; P:response to cytokinin; P:inflorescence development; P:auxin homeostasis; P:regulation of anthocyanin biosynthetic process; P:DNA endoreduplication; P:gynoecium development; P:cell division; P:negative regulation of leaf senescence; F:cis-regulatory region sequence-s…			IPR017887 (PFAM); mobidb-lite (MOBIDB_LITE); mobidb-lite (MOBIDB_LITE); mobidb-lite (MOBIDB_LITE); mobidb-lite (MOBIDB_LITE); mobidb-lite (MOBIDB_LITE); mobidb-lite (MOBIDB_LITE); PTHR31072:SF121 (PANTHER); IPR005333 (PANTHER); IPR017887 (PROSITE_PROFILES)	F:GO:0003700	F:DNA-binding transcription factor activity
TRINITY_DN1006_c0_g1_i10	TCP family transcription factor	1.1877e-173	18	P:GO:0006355; P:GO:0007623; P:GO:0008361; P:GO:0009653; P:GO:0009735; P:GO:0010229; P:GO:0010252; P:GO:0031347; P:GO:0031540; P:GO:0042023; P:GO:0048364; P:GO:0048467; P:GO:0051301; P:GO:1900056; F:GO:0000987; F:GO:0003700; F:GO:0005515; C:GO:0005634	P:regulation of transcription, DNA-templated; P:circadian rhythm; P:regulation of cell size; P:anatomical structure morphogenesis; P:response to cytokinin; P:inflorescence development; P:auxin homeostasis; P:regulation of defense response; P:regulation of anthocyanin biosynthetic process; P:DNA endoreduplication; P:root development; P:gynoecium development; P:cell division; P:negative regulation …			IPR017887 (PFAM); mobidb-lite (MOBIDB_LITE); mobidb-lite (MOBIDB_LITE); mobidb-lite (MOBIDB_LITE); PTHR31072:SF121 (PANTHER); IPR005333 (PANTHER); IPR017887 (PROSITE_PROFILES)	F:GO:0003700	F:DNA-binding transcription factor activity
TRINITY_DN1006_c0_g1_i11	TEOSINTE BRANCHED 1, cycloidea, PCF (TCP)-domain family protein 20	2.37722e-169	16	P:GO:0006355; P:GO:0007623; P:GO:0008361; P:GO:0009653; P:GO:0009735; P:GO:0010229; P:GO:0010252; P:GO:0031540; P:GO:0042023; P:GO:0048467; P:GO:0051301; P:GO:1900056; F:GO:0000987; F:GO:0003700; F:GO:0005515; C:GO:0005634	P:regulation of transcription, DNA-templated; P:circadian rhythm; P:regulation of cell size; P:anatomical structure morphogenesis; P:response to cytokinin; P:inflorescence development; P:auxin homeostasis; P:regulation of anthocyanin biosynthetic process; P:DNA endoreduplication; P:gynoecium development; P:cell division; P:negative regulation of leaf senescence; F:cis-regulatory region sequence-s…			IPR017887 (PFAM); mobidb-lite (MOBIDB_LITE); mobidb-lite (MOBIDB_LITE); mobidb-lite (MOBIDB_LITE); mobidb-lite (MOBIDB_LITE); mobidb-lite (MOBIDB_LITE); mobidb-lite (MOBIDB_LITE); IPR005333 (PANTHER); PTHR31072:SF121 (PANTHER); IPR017887 (PROSITE_PROFILES)	F:GO:0003700	F:DNA-binding transcription factor activity
TRINITY_DN1006_c0_g1_i2	TEOSINTE BRANCHED 1, cycloidea, PCF (TCP)-domain family protein 20	4.86758e-176	16	P:GO:0006355; P:GO:0007623; P:GO:0008361; P:GO:0009653; P:GO:0009735; P:GO:0010229; P:GO:0010252; P:GO:0031540; P:GO:0042023; P:GO:0048467; P:GO:0051301; P:GO:1900056; F:GO:0000987; F:GO:0003700; F:GO:0005515; C:GO:0005634	P:regulation of transcription, DNA-templated; P:circadian rhythm; P:regulation of cell size; P:anatomical structure morphogenesis; P:response to cytokinin; P:inflorescence development; P:auxin homeostasis; P:regulation of anthocyanin biosynthetic process; P:DNA endoreduplication; P:gynoecium development; P:cell division; P:negative regulation of leaf senescence; F:cis-regulatory region sequence-s…			IPR017887 (PFAM); mobidb-lite (MOBIDB_LITE); mobidb-lite (MOBIDB_LITE); mobidb-lite (MOBIDB_LITE); mobidb-lite (MOBIDB_LITE); mobidb-lite (MOBIDB_LITE); mobidb-lite (MOBIDB_LITE); IPR005333 (PANTHER); PTHR31072:SF121 (PANTHER); IPR017887 (PROSITE_PROFILES)	F:GO:0003700	F:DNA-binding transcription factor activity
TRINITY_DN1006_c0_g1_i3	TEOSINTE BRANCHED 1, cycloidea, PCF (TCP)-domain family protein 20	2.60543e-171	16	P:GO:0006355; P:GO:0007623; P:GO:0008361; P:GO:0009653; P:GO:0009735; P:GO:0010229; P:GO:0010252; P:GO:0031540; P:GO:0042023; P:GO:0048467; P:GO:0051301; P:GO:1900056; F:GO:0000987; F:GO:0003700; F:GO:0005515; C:GO:0005634	P:regulation of transcription, DNA-templated; P:circadian rhythm; P:regulation of cell size; P:anatomical structure morphogenesis; P:response to cytokinin; P:inflorescence development; P:auxin homeostasis; P:regulation of anthocyanin biosynthetic process; P:DNA endoreduplication; P:gynoecium development; P:cell division; P:negative regulation of leaf senescence; F:cis-regulatory region sequence-s…			IPR017887 (PFAM); mobidb-lite (MOBIDB_LITE); mobidb-lite (MOBIDB_LITE); mobidb-lite (MOBIDB_LITE); mobidb-lite (MOBIDB_LITE); mobidb-lite (MOBIDB_LITE); PTHR31072:SF121 (PANTHER); IPR005333 (PANTHER); IPR017887 (PROSITE_PROFILES)	F:GO:0003700	F:DNA-binding transcription factor activity
TRINITY_DN1006_c0_g1_i4	TEOSINTE BRANCHED 1, cycloidea, PCF (TCP)-domain family protein 20	2.11494e-172	17	P:GO:0006355; P:GO:0007623; P:GO:0008361; P:GO:0009653; P:GO:0009735; P:GO:0010229; P:GO:0010252; P:GO:0031347; P:GO:0031540; P:GO:0042023; P:GO:0048467; P:GO:0051301; P:GO:1900056; F:GO:0000987; F:GO:0003700; F:GO:0005515; C:GO:0005634	P:regulation of transcription, DNA-templated; P:circadian rhythm; P:regulation of cell size; P:anatomical structure morphogenesis; P:response to cytokinin; P:inflorescence development; P:auxin homeostasis; P:regulation of defense response; P:regulation of anthocyanin biosynthetic process; P:DNA endoreduplication; P:gynoecium development; P:cell division; P:negative regulation of leaf senescence; …			IPR017887 (PFAM); mobidb-lite (MOBIDB_LITE); mobidb-lite (MOBIDB_LITE); mobidb-lite (MOBIDB_LITE); mobidb-lite (MOBIDB_LITE); PTHR31072:SF121 (PANTHER); IPR005333 (PANTHER); IPR017887 (PROSITE_PROFILES)	F:GO:0003700	F:DNA-binding transcription factor activity
TRINITY_DN1006_c0_g1_i5	TEOSINTE BRANCHED 1, cycloidea, PCF (TCP)-domain family protein 20	3.93929e-173	16	P:GO:0006355; P:GO:0007623; P:GO:0008361; P:GO:0009653; P:GO:0009735; P:GO:0010229; P:GO:0010252; P:GO:0031540; P:GO:0042023; P:GO:0048467; P:GO:0051301; P:GO:1900056; F:GO:0000987; F:GO:0003700; F:GO:0005515; C:GO:0005634	P:regulation of transcription, DNA-templated; P:circadian rhythm; P:regulation of cell size; P:anatomical structure morphogenesis; P:response to cytokinin; P:inflorescence development; P:auxin homeostasis; P:regulation of anthocyanin biosynthetic process; P:DNA endoreduplication; P:gynoecium development; P:cell division; P:negative regulation of leaf senescence; F:cis-regulatory region sequence-s…			IPR017887 (PFAM); mobidb-lite (MOBIDB_LITE); mobidb-lite (MOBIDB_LITE); mobidb-lite (MOBIDB_LITE); mobidb-lite (MOBIDB_LITE); mobidb-lite (MOBIDB_LITE); mobidb-lite (MOBIDB_LITE); IPR005333 (PANTHER); PTHR31072:SF121 (PANTHER); IPR017887 (PROSITE_PROFILES)	F:GO:0003700	F:DNA-binding transcription factor activity
TRINITY_DN1006_c0_g1_i6	TEOSINTE BRANCHED 1, cycloidea, PCF (TCP)-domain family protein 20	6.11828e-90	8	P:GO:0006355; P:GO:0008361; P:GO:0009653; P:GO:1900056; F:GO:0000987; F:GO:0003700; F:GO:0005515; C:GO:0005634	P:regulation of transcription, DNA-templated; P:regulation of cell size; P:anatomical structure morphogenesis; P:negative regulation of leaf senescence; F:cis-regulatory region sequence-specific DNA binding; F:DNA-binding transcription factor activity; F:protein binding; C:nucleus			mobidb-lite (MOBIDB_LITE); mobidb-lite (MOBIDB_LITE); mobidb-lite (MOBIDB_LITE); IPR005333 (PANTHER); PTHR31072:SF121 (PANTHER)	F:GO:0003700	F:DNA-binding transcription factor activity
TRINITY_DN1006_c0_g1_i7	TEOSINTE BRANCHED 1, cycloidea, PCF (TCP)-domain family protein 20	5.54271e-167	16	P:GO:0006355; P:GO:0007623; P:GO:0008361; P:GO:0009653; P:GO:0009735; P:GO:0010229; P:GO:0010252; P:GO:0031540; P:GO:0042023; P:GO:0048467; P:GO:0051301; P:GO:1900056; F:GO:0000987; F:GO:0003700; F:GO:0005515; C:GO:0005634	P:regulation of transcription, DNA-templated; P:circadian rhythm; P:regulation of cell size; P:anatomical structure morphogenesis; P:response to cytokinin; P:inflorescence development; P:auxin homeostasis; P:regulation of anthocyanin biosynthetic process; P:DNA endoreduplication; P:gynoecium development; P:cell division; P:negative regulation of leaf senescence; F:cis-regulatory region sequence-s…			IPR017887 (PFAM); mobidb-lite (MOBIDB_LITE); mobidb-lite (MOBIDB_LITE); mobidb-lite (MOBIDB_LITE); mobidb-lite (MOBIDB_LITE); mobidb-lite (MOBIDB_LITE); mobidb-lite (MOBIDB_LITE); PTHR31072:SF121 (PANTHER); IPR005333 (PANTHER); IPR017887 (PROSITE_PROFILES)	F:GO:0003700	F:DNA-binding transcription factor activity
TRINITY_DN1006_c0_g1_i8	TEOSINTE BRANCHED 1, cycloidea, PCF (TCP)-domain family protein 20	1.23339e-173	16	P:GO:0006355; P:GO:0007623; P:GO:0008361; P:GO:0009653; P:GO:0009735; P:GO:0010229; P:GO:0010252; P:GO:0031540; P:GO:0042023; P:GO:0048467; P:GO:0051301; P:GO:1900056; F:GO:0000987; F:GO:0003700; F:GO:0005515; C:GO:0005634	P:regulation of transcription, DNA-templated; P:circadian rhythm; P:regulation of cell size; P:anatomical structure morphogenesis; P:response to cytokinin; P:inflorescence development; P:auxin homeostasis; P:regulation of anthocyanin biosynthetic process; P:DNA endoreduplication; P:gynoecium development; P:cell division; P:negative regulation of leaf senescence; F:cis-regulatory region sequence-s…			IPR017887 (PFAM); mobidb-lite (MOBIDB_LITE); mobidb-lite (MOBIDB_LITE); mobidb-lite (MOBIDB_LITE); mobidb-lite (MOBIDB_LITE); mobidb-lite (MOBIDB_LITE); mobidb-lite (MOBIDB_LITE); IPR005333 (PANTHER); PTHR31072:SF121 (PANTHER); IPR017887 (PROSITE_PROFILES)	F:GO:0003700	F:DNA-binding transcription factor activity
TRINITY_DN1006_c0_g1_i9	TEOSINTE BRANCHED 1, cycloidea, PCF (TCP)-domain family protein 20	2.79786e-174	16	P:GO:0006355; P:GO:0007623; P:GO:0008361; P:GO:0009653; P:GO:0009735; P:GO:0010229; P:GO:0010252; P:GO:0031540; P:GO:0042023; P:GO:0048467; P:GO:0051301; P:GO:1900056; F:GO:0000987; F:GO:0003700; F:GO:0005515; C:GO:0005634	P:regulation of transcription, DNA-templated; P:circadian rhythm; P:regulation of cell size; P:anatomical structure morphogenesis; P:response to cytokinin; P:inflorescence development; P:auxin homeostasis; P:regulation of anthocyanin biosynthetic process; P:DNA endoreduplication; P:gynoecium development; P:cell division; P:negative regulation of leaf senescence; F:cis-regulatory region sequence-s…			IPR017887 (PFAM); mobidb-lite (MOBIDB_LITE); mobidb-lite (MOBIDB_LITE); mobidb-lite (MOBIDB_LITE); mobidb-lite (MOBIDB_LITE); mobidb-lite (MOBIDB_LITE); PTHR31072:SF121 (PANTHER); IPR005333 (PANTHER); IPR017887 (PROSITE_PROFILES)	F:GO:0003700	F:DNA-binding transcription factor activity
TRINITY_DN10060_c0_g1_i1	squamosa promoter binding protein-like 7	1.07454e-39	10	P:GO:0006355; P:GO:0035874; P:GO:0048638; P:GO:0055070; F:GO:0000976; F:GO:0003700; F:GO:0042803; F:GO:0046872; C:GO:0016021; C:GO:0016607	P:regulation of transcription, DNA-templated; P:cellular response to copper ion starvation; P:regulation of developmental growth; P:copper ion homeostasis; F:transcription regulatory region sequence-specific DNA binding; F:DNA-binding transcription factor activity; F:protein homodimerization activity; F:metal ion binding; C:integral component of membrane; C:nuclear speck			PTHR31251 (PANTHER); PTHR31251:SF108 (PANTHER)	no GO terms	no GO terms
TRINITY_DN10060_c0_g1_i2	squamosa promoter binding protein-like 7	7.13722e-57	10	P:GO:0006355; P:GO:0035874; P:GO:0048638; P:GO:0055070; F:GO:0000976; F:GO:0003700; F:GO:0042803; F:GO:0046872; C:GO:0016021; C:GO:0016607	P:regulation of transcription, DNA-templated; P:cellular response to copper ion starvation; P:regulation of developmental growth; P:copper ion homeostasis; F:transcription regulatory region sequence-specific DNA binding; F:DNA-binding transcription factor activity; F:protein homodimerization activity; F:metal ion binding; C:integral component of membrane; C:nuclear speck			PTHR31251 (PANTHER); PTHR31251:SF108 (PANTHER)	no GO terms	no GO terms
TRINITY_DN10060_c0_g1_i3	squamosa promoter binding protein-like 7	2.3655e-42	10	P:GO:0006355; P:GO:0035874; P:GO:0048638; P:GO:0055070; F:GO:0000976; F:GO:0003700; F:GO:0042803; F:GO:0046872; C:GO:0016021; C:GO:0016607	P:regulation of transcription, DNA-templated; P:cellular response to copper ion starvation; P:regulation of developmental growth; P:copper ion homeostasis; F:transcription regulatory region sequence-specific DNA binding; F:DNA-binding transcription factor activity; F:protein homodimerization activity; F:metal ion binding; C:integral component of membrane; C:nuclear speck			PTHR31251 (PANTHER); PTHR31251:SF108 (PANTHER)	no GO terms	no GO terms
TRINITY_DN10061_c0_g1_i1	autophagy 18h-like protein	1.1705e-152	6	P:GO:0006468; P:GO:0042594; F:GO:0004672; F:GO:0005524; C:GO:0005737; C:GO:0016020	P:protein phosphorylation; P:response to starvation; F:protein kinase activity; F:ATP binding; C:cytoplasm; C:membrane			IPR022175 (PFAM); mobidb-lite (MOBIDB_LITE); mobidb-lite (MOBIDB_LITE); PTHR13268:SF2 (PANTHER); PTHR13268 (PANTHER)	no GO terms	no GO terms
TRINITY_DN10063_c0_g1_i1	Kinase superfamily protein isoform 1	5.79949e-42	6	P:GO:0019752; P:GO:0046777; F:GO:0004674; F:GO:0005524; F:GO:0046912; C:GO:0005886	P:carboxylic acid metabolic process; P:protein autophosphorylation; F:protein serine/threonine kinase activity; F:ATP binding; F:transferase activity, transferring acyl groups, acyl groups converted into alkyl on transfer; C:plasma membrane			no IPS match	no IPS match	no IPS match
TRINITY_DN10064_c0_g1_i1	Pheophorbide a oxygenase family protein with Rieske 2Fe-2S domain-containing protein	2.96565e-28	7	P:GO:0015995; P:GO:0055114; F:GO:0005506; F:GO:0010277; F:GO:0051537; C:GO:0009535; C:GO:0009706	P:chlorophyll biosynthetic process; P:oxidation-reduction process; F:iron ion binding; F:chlorophyllide a oxygenase [overall] activity; F:2 iron, 2 sulfur cluster binding; C:chloroplast thylakoid membrane; C:chloroplast inner membrane	EC:1.13.12; EC:1.14.13.122	Acting on single donors with incorporation of molecular oxygen (oxygenases). The oxygen incorporated need not be derived from O(2); Chlorophyllide a oxygenase	no IPS match	no IPS match	no IPS match
TRINITY_DN10064_c0_g1_i2	Pheophorbide a oxygenase family protein with Rieske 2Fe-2S domain-containing protein	1.01723e-39	7	P:GO:0015995; P:GO:0055114; F:GO:0005506; F:GO:0010277; F:GO:0051537; C:GO:0009535; C:GO:0009706	P:chlorophyll biosynthetic process; P:oxidation-reduction process; F:iron ion binding; F:chlorophyllide a oxygenase [overall] activity; F:2 iron, 2 sulfur cluster binding; C:chloroplast thylakoid membrane; C:chloroplast inner membrane	EC:1.13.12; EC:1.14.13.122	Acting on single donors with incorporation of molecular oxygen (oxygenases). The oxygen incorporated need not be derived from O(2); Chlorophyllide a oxygenase	no IPS match	no IPS match	no IPS match
TRINITY_DN10065_c0_g1_i1	Lateral root primordium (LRP) protein-like protein	2.71329e-115	8	P:GO:0009555; P:GO:0009733; P:GO:0045893; P:GO:0048364; P:GO:0048653; F:GO:0003677; F:GO:0042803; C:GO:0005634	P:pollen development; P:response to auxin; P:positive regulation of transcription, DNA-templated; P:root development; P:anther development; F:DNA binding; F:protein homodimerization activity; C:nucleus			PF05142 (PFAM); IPR006510 (TIGRFAM); mobidb-lite (MOBIDB_LITE); mobidb-lite (MOBIDB_LITE); PTHR31604:SF30 (PANTHER); IPR007818 (PANTHER)	no GO terms	no GO terms
TRINITY_DN10066_c0_g1_i1	EIN3-binding F-box protein 1-like	3.79081e-89	8	P:GO:0010105; P:GO:0016567; P:GO:0031146; F:GO:0004842; F:GO:0005515; C:GO:0005634; C:GO:0016021; C:GO:0019005	P:negative regulation of ethylene-activated signaling pathway; P:protein ubiquitination; P:SCF-dependent proteasomal ubiquitin-dependent protein catabolic process; F:ubiquitin-protein transferase activity; F:protein binding; C:nucleus; C:integral component of membrane; C:SCF ubiquitin ligase complex			IPR001611 (PFAM); IPR032675 (G3DSA:3.80.10.GENE3D); PTHR13318:SF113 (PANTHER); PTHR13318 (PANTHER); SSF52047 (SUPERFAMILY)	F:GO:0005515	F:protein binding
TRINITY_DN10066_c0_g1_i2	EIN3-binding F-box protein 1-like	5.16802e-81	8	P:GO:0010105; P:GO:0016567; P:GO:0031146; F:GO:0004842; F:GO:0005515; C:GO:0005634; C:GO:0016021; C:GO:0019005	P:negative regulation of ethylene-activated signaling pathway; P:protein ubiquitination; P:SCF-dependent proteasomal ubiquitin-dependent protein catabolic process; F:ubiquitin-protein transferase activity; F:protein binding; C:nucleus; C:integral component of membrane; C:SCF ubiquitin ligase complex			IPR032675 (G3DSA:3.80.10.GENE3D); IPR001611 (PFAM); PTHR13318:SF113 (PANTHER); PTHR13318 (PANTHER); SSF52047 (SUPERFAMILY)	F:GO:0005515	F:protein binding
TRINITY_DN10067_c0_g1_i1	---NA---							no IPS match	no IPS match	no IPS match
TRINITY_DN10068_c0_g1_i1	---NA---							no IPS match	no IPS match	no IPS match
TRINITY_DN10068_c0_g1_i10	SWIM zinc finger family protein isoform 3	0	1	F:GO:0008270	F:zinc ion binding			PTHR33977:SF4 (PANTHER); PTHR33977:SF4 (PANTHER); PTHR33977 (PANTHER); IPR007527 (PROSITE_PROFILES)	F:GO:0008270	F:zinc ion binding
TRINITY_DN10068_c0_g1_i13	SWIM zinc finger family protein isoform 3	0	1	F:GO:0008270	F:zinc ion binding			PTHR33977:SF4 (PANTHER); PTHR33977:SF4 (PANTHER); PTHR33977 (PANTHER); IPR007527 (PROSITE_PROFILES)	F:GO:0008270	F:zinc ion binding
TRINITY_DN10068_c0_g1_i14	---NA---							no IPS match	no IPS match	no IPS match
TRINITY_DN10068_c0_g1_i3	SWIM zinc finger family protein isoform 3	0	1	F:GO:0008270	F:zinc ion binding			PTHR33977:SF4 (PANTHER); PTHR33977 (PANTHER); IPR007527 (PROSITE_PROFILES)	F:GO:0008270	F:zinc ion binding
TRINITY_DN10068_c0_g1_i4	SWIM zinc finger family protein isoform 3	0	1	F:GO:0008270	F:zinc ion binding			PTHR33977 (PANTHER); PTHR33977:SF4 (PANTHER); IPR007527 (PROSITE_PROFILES)	F:GO:0008270	F:zinc ion binding
TRINITY_DN10068_c0_g1_i5	SWIM zinc finger family protein isoform 3	0	1	F:GO:0008270	F:zinc ion binding			PTHR33977:SF4 (PANTHER); PTHR33977:SF4 (PANTHER); PTHR33977 (PANTHER); IPR007527 (PROSITE_PROFILES)	F:GO:0008270	F:zinc ion binding
TRINITY_DN10068_c0_g1_i6	SWIM zinc finger family protein isoform 3	0	1	F:GO:0008270	F:zinc ion binding			PTHR33977 (PANTHER); PTHR33977:SF4 (PANTHER); IPR007527 (PROSITE_PROFILES)	F:GO:0008270	F:zinc ion binding
TRINITY_DN10068_c0_g1_i7	SWIM zinc finger family protein isoform 3	0	1	F:GO:0008270	F:zinc ion binding			PTHR33977 (PANTHER); PTHR33977:SF4 (PANTHER); IPR007527 (PROSITE_PROFILES)	F:GO:0008270	F:zinc ion binding
TRINITY_DN10068_c0_g1_i8	SWIM zinc finger family protein isoform 3	0	1	F:GO:0008270	F:zinc ion binding			PTHR33977 (PANTHER); PTHR33977:SF4 (PANTHER); IPR007527 (PROSITE_PROFILES)	F:GO:0008270	F:zinc ion binding
TRINITY_DN10068_c0_g1_i9	SWIM zinc finger family protein isoform 3	0	1	F:GO:0008270	F:zinc ion binding			PTHR33977:SF4 (PANTHER); PTHR33977:SF4 (PANTHER); PTHR33977 (PANTHER); IPR007527 (PROSITE_PROFILES)	F:GO:0008270	F:zinc ion binding
TRINITY_DN10069_c0_g1_i2	transmembrane protein	1.42212e-60	13	P:GO:0007129; P:GO:0007131; P:GO:0018364; P:GO:0030488; P:GO:0035265; P:GO:0042127; P:GO:0051301; P:GO:0051726; P:GO:0070476; F:GO:0046982; C:GO:0000795; C:GO:0005829; C:GO:0016021	P:homologous chromosome pairing at meiosis; P:reciprocal meiotic recombination; P:peptidyl-glutamine methylation; P:tRNA methylation; P:organ growth; P:regulation of cell population proliferation; P:cell division; P:regulation of cell cycle; P:rRNA (guanine-N7)-methylation; F:protein heterodimerization activity; C:synaptonemal complex; C:cytosol; C:integral component of membrane			IPR005651 (PFAM); G3DSA:2.20.25.10 (GENE3D); IPR039127 (PANTHER); PTHR12773:SF3 (PANTHER); SSF158997 (SUPERFAMILY)	F:GO:0046982	F:protein heterodimerization activity
TRINITY_DN10069_c0_g1_i4	Trm112p-like protein	1.70231e-61	12	P:GO:0007129; P:GO:0007131; P:GO:0018364; P:GO:0030488; P:GO:0035265; P:GO:0042127; P:GO:0051301; P:GO:0051726; P:GO:0070476; F:GO:0046982; C:GO:0000795; C:GO:0005829	P:homologous chromosome pairing at meiosis; P:reciprocal meiotic recombination; P:peptidyl-glutamine methylation; P:tRNA methylation; P:organ growth; P:regulation of cell population proliferation; P:cell division; P:regulation of cell cycle; P:rRNA (guanine-N7)-methylation; F:protein heterodimerization activity; C:synaptonemal complex; C:cytosol			IPR005651 (PFAM); G3DSA:2.20.25.10 (GENE3D); PTHR12773:SF3 (PANTHER); IPR039127 (PANTHER); SSF158997 (SUPERFAMILY)	F:GO:0046982	F:protein heterodimerization activity
TRINITY_DN10069_c1_g1_i1	Translation initiation factor SUI1 family protein	4.02369e-96	6	P:GO:0001731; P:GO:0002188; F:GO:0003729; F:GO:0003743; C:GO:0005737; C:GO:0005840	P:formation of translation preinitiation complex; P:translation reinitiation; F:mRNA binding; F:translation initiation factor activity; C:cytoplasm; C:ribosome			G3DSA:3.30.780.10 (GENE3D); IPR001950 (PFAM); IPR005873 (TIGRFAM); mobidb-lite (MOBIDB_LITE); mobidb-lite (MOBIDB_LITE); PTHR12789:SF1 (PANTHER); PTHR12789 (PANTHER); IPR001950 (PROSITE_PROFILES); cd11607 (CDD); IPR036877 (SUPERFAMILY)	P:GO:0006413; F:GO:0003743	P:translational initiation; F:translation initiation factor activity
TRINITY_DN10069_c1_g1_i2	Translation initiation factor SUI1 family protein	3.27918e-97	6	P:GO:0001731; P:GO:0002188; F:GO:0003729; F:GO:0003743; C:GO:0005737; C:GO:0005840	P:formation of translation preinitiation complex; P:translation reinitiation; F:mRNA binding; F:translation initiation factor activity; C:cytoplasm; C:ribosome			IPR005873 (TIGRFAM); G3DSA:3.30.780.10 (GENE3D); IPR001950 (PFAM); mobidb-lite (MOBIDB_LITE); mobidb-lite (MOBIDB_LITE); PTHR12789:SF1 (PANTHER); PTHR12789 (PANTHER); IPR001950 (PROSITE_PROFILES); cd11607 (CDD); IPR036877 (SUPERFAMILY)	P:GO:0006413; F:GO:0003743	P:translational initiation; F:translation initiation factor activity
TRINITY_DN10069_c1_g1_i3	Translation initiation factor SUI1 family protein	2.33461e-72	6	P:GO:0001731; P:GO:0002188; F:GO:0003729; F:GO:0003743; C:GO:0005737; C:GO:0005840	P:formation of translation preinitiation complex; P:translation reinitiation; F:mRNA binding; F:translation initiation factor activity; C:cytoplasm; C:ribosome			IPR001950 (PFAM); IPR005873 (TIGRFAM); G3DSA:3.30.780.10 (GENE3D); mobidb-lite (MOBIDB_LITE); mobidb-lite (MOBIDB_LITE); PTHR12789 (PANTHER); PTHR12789:SF1 (PANTHER); IPR001950 (PROSITE_PROFILES); cd11607 (CDD); IPR036877 (SUPERFAMILY)	P:GO:0006413; F:GO:0003743	P:translational initiation; F:translation initiation factor activity
TRINITY_DN10069_c1_g1_i4	Translation initiation factor SUI1 family protein	5.10577e-100	6	P:GO:0001731; P:GO:0002188; F:GO:0003729; F:GO:0003743; C:GO:0005737; C:GO:0005840	P:formation of translation preinitiation complex; P:translation reinitiation; F:mRNA binding; F:translation initiation factor activity; C:cytoplasm; C:ribosome			G3DSA:3.30.780.10 (GENE3D); IPR005873 (TIGRFAM); IPR001950 (PFAM); mobidb-lite (MOBIDB_LITE); mobidb-lite (MOBIDB_LITE); PTHR12789:SF1 (PANTHER); PTHR12789 (PANTHER); IPR001950 (PROSITE_PROFILES); cd11607 (CDD); IPR036877 (SUPERFAMILY)	P:GO:0006413; F:GO:0003743	P:translational initiation; F:translation initiation factor activity
TRINITY_DN10069_c1_g1_i5	---NA---							no IPS match	no IPS match	no IPS match
TRINITY_DN10069_c2_g1_i1	Mitochondrial import inner membrane translocase subunit Tim17/Tim22/Tim23 family protein	9.18663e-14	1	C:GO:0016021	C:integral component of membrane			no IPS match	no IPS match	no IPS match
TRINITY_DN1007_c0_g1_i1	ATP-dependent zinc metalloprotease FTSH 3, mitochondrial-like isoform X4	0	17	P:GO:0008053; P:GO:0010206; P:GO:0010304; P:GO:0034982; P:GO:0042407; P:GO:0051301; P:GO:0065003; F:GO:0004176; F:GO:0004222; F:GO:0005515; F:GO:0005524; F:GO:0008270; C:GO:0005743; C:GO:0009535; C:GO:0009941; C:GO:0016021; C:GO:0031977	P:mitochondrial fusion; P:photosystem II repair; P:PSII associated light-harvesting complex II catabolic process; P:mitochondrial protein processing; P:cristae formation; P:cell division; P:protein-containing complex assembly; F:ATP-dependent peptidase activity; F:metalloendopeptidase activity; F:protein binding; F:ATP binding; F:zinc ion binding; C:mitochondrial inner membrane; C:chloroplast thy…	EC:3.4.24; EC:3.6.1.3; EC:3.6.1.15	Acting on peptide bonds (peptidases); Adenosinetriphosphatase; Nucleoside-triphosphate phosphatase	G3DSA:1.10.8.60 (GENE3D); IPR005936 (TIGRFAM); IPR003959 (PFAM); G3DSA:3.40.1690.20 (GENE3D); IPR041569 (PFAM); G3DSA:3.40.50.300 (GENE3D); IPR037219 (G3DSA:1.20.58.GENE3D); IPR011546 (PFAM); IPR000642 (PFAM); mobidb-lite (MOBIDB_LITE); mobidb-lite (MOBIDB_LITE); mobidb-lite (MOBIDB_LITE); mobidb-lite (MOBIDB_LITE); PTHR43655 (PANTHER); PTHR43655:SF24 (PANTHER); IPR005936 (HAMAP); cd00009 (CDD); …	P:GO:0006508; F:GO:0004222; F:GO:0005524; F:GO:0008270; C:GO:0016020; C:GO:0016021	P:proteolysis; F:metalloendopeptidase activity; F:ATP binding; F:zinc ion binding; C:membrane; C:integral component of membrane
TRINITY_DN1007_c0_g1_i2	ATP-dependent zinc metalloprotease FTSH 3, mitochondrial-like isoform X4	0	17	P:GO:0008053; P:GO:0010206; P:GO:0010304; P:GO:0034982; P:GO:0042407; P:GO:0051301; P:GO:0065003; F:GO:0004176; F:GO:0004222; F:GO:0005515; F:GO:0005524; F:GO:0008270; C:GO:0005743; C:GO:0009535; C:GO:0009941; C:GO:0016021; C:GO:0031977	P:mitochondrial fusion; P:photosystem II repair; P:PSII associated light-harvesting complex II catabolic process; P:mitochondrial protein processing; P:cristae formation; P:cell division; P:protein-containing complex assembly; F:ATP-dependent peptidase activity; F:metalloendopeptidase activity; F:protein binding; F:ATP binding; F:zinc ion binding; C:mitochondrial inner membrane; C:chloroplast thy…	EC:3.4.24; EC:3.6.1.3; EC:3.6.1.15	Acting on peptide bonds (peptidases); Adenosinetriphosphatase; Nucleoside-triphosphate phosphatase	IPR041569 (PFAM); IPR003959 (PFAM); G3DSA:3.40.50.300 (GENE3D); IPR011546 (PFAM); IPR037219 (G3DSA:1.20.58.GENE3D); IPR005936 (TIGRFAM); IPR000642 (PFAM); G3DSA:1.10.8.60 (GENE3D); G3DSA:3.40.1690.20 (GENE3D); mobidb-lite (MOBIDB_LITE); mobidb-lite (MOBIDB_LITE); mobidb-lite (MOBIDB_LITE); PTHR43655 (PANTHER); PTHR43655:SF24 (PANTHER); IPR005936 (HAMAP); cd00009 (CDD); IPR037219 (SUPERFAMILY); IP…	P:GO:0006508; F:GO:0004222; F:GO:0005524; F:GO:0008270; C:GO:0016020; C:GO:0016021	P:proteolysis; F:metalloendopeptidase activity; F:ATP binding; F:zinc ion binding; C:membrane; C:integral component of membrane
TRINITY_DN1007_c0_g1_i3	ATP-dependent zinc metalloprotease FTSH 3, mitochondrial-like isoform X4	0	17	P:GO:0008053; P:GO:0010206; P:GO:0010304; P:GO:0034982; P:GO:0042407; P:GO:0051301; P:GO:0065003; F:GO:0004176; F:GO:0004222; F:GO:0005515; F:GO:0005524; F:GO:0008270; C:GO:0005743; C:GO:0009535; C:GO:0009941; C:GO:0016021; C:GO:0031977	P:mitochondrial fusion; P:photosystem II repair; P:PSII associated light-harvesting complex II catabolic process; P:mitochondrial protein processing; P:cristae formation; P:cell division; P:protein-containing complex assembly; F:ATP-dependent peptidase activity; F:metalloendopeptidase activity; F:protein binding; F:ATP binding; F:zinc ion binding; C:mitochondrial inner membrane; C:chloroplast thy…	EC:3.4.24; EC:3.6.1.3; EC:3.6.1.15	Acting on peptide bonds (peptidases); Adenosinetriphosphatase; Nucleoside-triphosphate phosphatase	IPR003959 (PFAM); G3DSA:3.40.1690.20 (GENE3D); IPR011546 (PFAM); IPR041569 (PFAM); G3DSA:1.10.8.60 (GENE3D); G3DSA:3.40.50.300 (GENE3D); IPR000642 (PFAM); IPR037219 (G3DSA:1.20.58.GENE3D); IPR005936 (TIGRFAM); mobidb-lite (MOBIDB_LITE); mobidb-lite (MOBIDB_LITE); PTHR43655:SF24 (PANTHER); PTHR43655 (PANTHER); IPR005936 (HAMAP); cd00009 (CDD); IPR037219 (SUPERFAMILY); IPR027417 (SUPERFAMILY)	P:GO:0006508; F:GO:0004222; F:GO:0005524; F:GO:0008270; C:GO:0016020; C:GO:0016021	P:proteolysis; F:metalloendopeptidase activity; F:ATP binding; F:zinc ion binding; C:membrane; C:integral component of membrane
TRINITY_DN1007_c0_g1_i4	ATP-dependent zinc metalloprotease FTSH 3, mitochondrial-like isoform X4	0	17	P:GO:0008053; P:GO:0010206; P:GO:0010304; P:GO:0034982; P:GO:0042407; P:GO:0051301; P:GO:0065003; F:GO:0004176; F:GO:0004222; F:GO:0005515; F:GO:0005524; F:GO:0008270; C:GO:0005743; C:GO:0009535; C:GO:0009941; C:GO:0016021; C:GO:0031977	P:mitochondrial fusion; P:photosystem II repair; P:PSII associated light-harvesting complex II catabolic process; P:mitochondrial protein processing; P:cristae formation; P:cell division; P:protein-containing complex assembly; F:ATP-dependent peptidase activity; F:metalloendopeptidase activity; F:protein binding; F:ATP binding; F:zinc ion binding; C:mitochondrial inner membrane; C:chloroplast thy…	EC:3.4.24; EC:3.6.1.3; EC:3.6.1.15	Acting on peptide bonds (peptidases); Adenosinetriphosphatase; Nucleoside-triphosphate phosphatase	G3DSA:3.40.1690.20 (GENE3D); IPR011546 (PFAM); IPR005936 (TIGRFAM); G3DSA:3.40.50.300 (GENE3D); IPR041569 (PFAM); IPR003959 (PFAM); IPR000642 (PFAM); IPR037219 (G3DSA:1.20.58.GENE3D); G3DSA:1.10.8.60 (GENE3D); mobidb-lite (MOBIDB_LITE); mobidb-lite (MOBIDB_LITE); mobidb-lite (MOBIDB_LITE); PTHR43655:SF24 (PANTHER); PTHR43655 (PANTHER); IPR005936 (HAMAP); cd00009 (CDD); IPR037219 (SUPERFAMILY); IP…	P:GO:0006508; F:GO:0004222; F:GO:0005524; F:GO:0008270; C:GO:0016020; C:GO:0016021	P:proteolysis; F:metalloendopeptidase activity; F:ATP binding; F:zinc ion binding; C:membrane; C:integral component of membrane
TRINITY_DN1007_c0_g2_i1	FTSH protease 10	0	19	P:GO:0008053; P:GO:0010027; P:GO:0010205; P:GO:0010206; P:GO:0010304; P:GO:0034982; P:GO:0042407; P:GO:0051301; P:GO:0065003; F:GO:0004176; F:GO:0004222; F:GO:0005515; F:GO:0005524; F:GO:0008270; C:GO:0005743; C:GO:0009535; C:GO:0009941; C:GO:0016021; C:GO:0031977	P:mitochondrial fusion; P:thylakoid membrane organization; P:photoinhibition; P:photosystem II repair; P:PSII associated light-harvesting complex II catabolic process; P:mitochondrial protein processing; P:cristae formation; P:cell division; P:protein-containing complex assembly; F:ATP-dependent peptidase activity; F:metalloendopeptidase activity; F:protein binding; F:ATP binding; F:zinc ion bind…	EC:3.4.24; EC:3.6.1.3; EC:3.6.1.15	Acting on peptide bonds (peptidases); Adenosinetriphosphatase; Nucleoside-triphosphate phosphatase	G3DSA:3.40.1690.20 (GENE3D); IPR003959 (PFAM); IPR037219 (G3DSA:1.20.58.GENE3D); IPR011546 (PFAM); IPR000642 (PFAM); G3DSA:1.10.8.60 (GENE3D); IPR041569 (PFAM); IPR005936 (TIGRFAM); G3DSA:3.40.50.300 (GENE3D); mobidb-lite (MOBIDB_LITE); mobidb-lite (MOBIDB_LITE); mobidb-lite (MOBIDB_LITE); PTHR43655 (PANTHER); PTHR43655:SF24 (PANTHER); IPR005936 (HAMAP); cd00009 (CDD); IPR027417 (SUPERFAMILY); IP…	P:GO:0006508; F:GO:0004222; F:GO:0005524; F:GO:0008270; C:GO:0016020; C:GO:0016021	P:proteolysis; F:metalloendopeptidase activity; F:ATP binding; F:zinc ion binding; C:membrane; C:integral component of membrane
TRINITY_DN10070_c0_g1_i1	annexin-like protein RJ4 isoform X2	4.25583e-08	3	F:GO:0005509; F:GO:0005544; C:GO:0005737	F:calcium ion binding; F:calcium-dependent phospholipid binding; C:cytoplasm			no IPS match	no IPS match	no IPS match
TRINITY_DN10070_c0_g1_i3	annexin-like protein RJ4	9.22382e-09	3	F:GO:0005509; F:GO:0005544; C:GO:0005737	F:calcium ion binding; F:calcium-dependent phospholipid binding; C:cytoplasm			no IPS match	no IPS match	no IPS match
TRINITY_DN10071_c0_g1_i2	alpha/beta-Hydrolases superfamily protein	0	3	F:GO:0016787; C:GO:0005634; C:GO:0016021	F:hydrolase activity; C:nucleus; C:integral component of membrane			IPR029058 (G3DSA:3.40.50.GENE3D); mobidb-lite (MOBIDB_LITE); mobidb-lite (MOBIDB_LITE); mobidb-lite (MOBIDB_LITE); mobidb-lite (MOBIDB_LITE); mobidb-lite (MOBIDB_LITE); mobidb-lite (MOBIDB_LITE); mobidb-lite (MOBIDB_LITE); mobidb-lite (MOBIDB_LITE); mobidb-lite (MOBIDB_LITE); mobidb-lite (MOBIDB_LITE); mobidb-lite (MOBIDB_LITE); mobidb-lite (MOBIDB_LITE); mobidb-lite (MOBIDB_LITE); mobidb-lite (M…	no GO terms	no GO terms
TRINITY_DN10071_c0_g1_i3	alpha/beta-Hydrolases superfamily protein	0	3	F:GO:0016787; C:GO:0005634; C:GO:0016021	F:hydrolase activity; C:nucleus; C:integral component of membrane			IPR029058 (G3DSA:3.40.50.GENE3D); mobidb-lite (MOBIDB_LITE); mobidb-lite (MOBIDB_LITE); mobidb-lite (MOBIDB_LITE); mobidb-lite (MOBIDB_LITE); mobidb-lite (MOBIDB_LITE); mobidb-lite (MOBIDB_LITE); mobidb-lite (MOBIDB_LITE); mobidb-lite (MOBIDB_LITE); mobidb-lite (MOBIDB_LITE); mobidb-lite (MOBIDB_LITE); mobidb-lite (MOBIDB_LITE); mobidb-lite (MOBIDB_LITE); mobidb-lite (MOBIDB_LITE); mobidb-lite (M…	no GO terms	no GO terms
TRINITY_DN10071_c0_g1_i4	alpha/beta-Hydrolases superfamily protein	3.39423e-151	4	P:GO:0071586; F:GO:0004197; C:GO:0005634; C:GO:0016021	P:CAAX-box protein processing; F:cysteine-type endopeptidase activity; C:nucleus; C:integral component of membrane	EC:3.4.22	Acting on peptide bonds (peptidases)	IPR003675 (PFAM); PTHR43592:SF20 (PANTHER); PTHR43592 (PANTHER)	P:GO:0071586; F:GO:0004197; C:GO:0016020	P:CAAX-box protein processing; F:cysteine-type endopeptidase activity; C:membrane
TRINITY_DN10071_c0_g1_i5	alpha/beta-Hydrolases superfamily protein	3.15676e-151	4	P:GO:0071586; F:GO:0004197; C:GO:0005634; C:GO:0016021	P:CAAX-box protein processing; F:cysteine-type endopeptidase activity; C:nucleus; C:integral component of membrane	EC:3.4.22	Acting on peptide bonds (peptidases)	IPR003675 (PFAM); PTHR43592:SF20 (PANTHER); PTHR43592 (PANTHER)	P:GO:0071586; F:GO:0004197; C:GO:0016020	P:CAAX-box protein processing; F:cysteine-type endopeptidase activity; C:membrane
TRINITY_DN10071_c0_g1_i6	alpha/beta-Hydrolases superfamily protein	0	4	P:GO:0071586; F:GO:0004197; C:GO:0005634; C:GO:0016021	P:CAAX-box protein processing; F:cysteine-type endopeptidase activity; C:nucleus; C:integral component of membrane	EC:3.4.22	Acting on peptide bonds (peptidases)	IPR003675 (PFAM); IPR029058 (G3DSA:3.40.50.GENE3D); mobidb-lite (MOBIDB_LITE); mobidb-lite (MOBIDB_LITE); mobidb-lite (MOBIDB_LITE); mobidb-lite (MOBIDB_LITE); mobidb-lite (MOBIDB_LITE); mobidb-lite (MOBIDB_LITE); mobidb-lite (MOBIDB_LITE); mobidb-lite (MOBIDB_LITE); mobidb-lite (MOBIDB_LITE); mobidb-lite (MOBIDB_LITE); mobidb-lite (MOBIDB_LITE); mobidb-lite (MOBIDB_LITE); mobidb-lite (MOBIDB_LIT…	P:GO:0071586; F:GO:0004197; C:GO:0016020	P:CAAX-box protein processing; F:cysteine-type endopeptidase activity; C:membrane
TRINITY_DN10071_c0_g1_i7	alpha/beta-Hydrolases superfamily protein	0	4	P:GO:0071586; F:GO:0004197; C:GO:0005634; C:GO:0016021	P:CAAX-box protein processing; F:cysteine-type endopeptidase activity; C:nucleus; C:integral component of membrane	EC:3.4.22	Acting on peptide bonds (peptidases)	IPR003675 (PFAM); IPR029058 (G3DSA:3.40.50.GENE3D); mobidb-lite (MOBIDB_LITE); mobidb-lite (MOBIDB_LITE); mobidb-lite (MOBIDB_LITE); mobidb-lite (MOBIDB_LITE); mobidb-lite (MOBIDB_LITE); mobidb-lite (MOBIDB_LITE); mobidb-lite (MOBIDB_LITE); mobidb-lite (MOBIDB_LITE); mobidb-lite (MOBIDB_LITE); mobidb-lite (MOBIDB_LITE); mobidb-lite (MOBIDB_LITE); mobidb-lite (MOBIDB_LITE); mobidb-lite (MOBIDB_LIT…	P:GO:0071586; F:GO:0004197; C:GO:0016020	P:CAAX-box protein processing; F:cysteine-type endopeptidase activity; C:membrane
TRINITY_DN10072_c0_g1_i1	Magnesium transporter CorA-like family protein isoform 1	2.12508e-29	1	C:GO:0016021	C:integral component of membrane			no IPS match	no IPS match	no IPS match
TRINITY_DN10072_c0_g1_i2	Magnesium transporter CorA-like family protein isoform 1	1.16744e-27	1	C:GO:0016021	C:integral component of membrane			no IPS match	no IPS match	no IPS match
TRINITY_DN10072_c0_g2_i1	Magnesium transporter CorA-like family protein isoform 1	0	1	C:GO:0016021	C:integral component of membrane			PF01544 (PFAM); G3DSA:1.20.58.340 (GENE3D); PTHR47468:SF1 (PANTHER); PTHR47468 (PANTHER); SSF143865 (SUPERFAMILY)	no GO terms	no GO terms
TRINITY_DN10072_c0_g2_i2	Magnesium transporter CorA-like family protein isoform 1	0	1	C:GO:0016021	C:integral component of membrane			G3DSA:1.20.58.340 (GENE3D); PF01544 (PFAM); G3DSA:1.20.58.340 (GENE3D); PTHR47468 (PANTHER); PTHR47468:SF1 (PANTHER); SSF144083 (SUPERFAMILY); SSF143865 (SUPERFAMILY)	no GO terms	no GO terms
TRINITY_DN10072_c0_g2_i3	Magnesium transporter CorA-like family protein isoform 1	0	1	C:GO:0016021	C:integral component of membrane			G3DSA:1.20.58.340 (GENE3D); PF01544 (PFAM); G3DSA:1.20.58.340 (GENE3D); PTHR47468 (PANTHER); PTHR47468:SF1 (PANTHER); SSF144083 (SUPERFAMILY); SSF143865 (SUPERFAMILY)	no GO terms	no GO terms
TRINITY_DN10072_c0_g3_i1	Magnesium transporter CorA-like family protein isoform 1	3.3601e-32	1	C:GO:0016021	C:integral component of membrane			PTHR47468:SF2 (PANTHER); PTHR47468 (PANTHER)	no GO terms	no GO terms
TRINITY_DN10073_c0_g1_i1	paired amphipathic helix protein Sin3-like 2 isoform X1	1.37381e-52	7	P:GO:0000122; P:GO:0016575; F:GO:0003714; F:GO:0004407; F:GO:0005515; C:GO:0000118; C:GO:0000785	P:negative regulation of transcription by RNA polymerase II; P:histone deacetylation; F:transcription corepressor activity; F:histone deacetylase activity; F:protein binding; C:histone deacetylase complex; C:chromatin	EC:3.5.1.98	Histone deacetylase	IPR013194 (PFAM); IPR039774 (PANTHER); PTHR12346:SF28 (PANTHER)	F:GO:0003714	F:transcription corepressor activity
TRINITY_DN10073_c0_g1_i2	SIN3-like 5	3.86829e-07	6	P:GO:0000122; P:GO:0016575; F:GO:0003714; F:GO:0004407; C:GO:0000118; C:GO:0000785	P:negative regulation of transcription by RNA polymerase II; P:histone deacetylation; F:transcription corepressor activity; F:histone deacetylase activity; C:histone deacetylase complex; C:chromatin	EC:3.5.1.98	Histone deacetylase	no IPS match	no IPS match	no IPS match
TRINITY_DN10073_c0_g1_i3	paired amphipathic helix protein Sin3-like 2 isoform X1	2.37443e-53	6	P:GO:0000122; P:GO:0016575; F:GO:0003714; F:GO:0004407; C:GO:0000118; C:GO:0000785	P:negative regulation of transcription by RNA polymerase II; P:histone deacetylation; F:transcription corepressor activity; F:histone deacetylase activity; C:histone deacetylase complex; C:chromatin	EC:3.5.1.98	Histone deacetylase	IPR013194 (PFAM); IPR039774 (PANTHER); PTHR12346:SF28 (PANTHER)	F:GO:0003714	F:transcription corepressor activity
TRINITY_DN10073_c1_g1_i1	---NA---							no IPS match	no IPS match	no IPS match
TRINITY_DN10074_c0_g1_i1	Nucleotide excision repair, TFIIH, subunit TTDA	4.52139e-44	6	P:GO:0006294; P:GO:0070816; C:GO:0000439; C:GO:0005669; C:GO:0005675; C:GO:0016021	P:nucleotide-excision repair, preincision complex assembly; P:phosphorylation of RNA polymerase II C-terminal domain; C:transcription factor TFIIH core complex; C:transcription factor TFIID complex; C:transcription factor TFIIH holo complex; C:integral component of membrane			IPR035935 (G3DSA:3.30.70.GENE3D); IPR009400 (PFAM); IPR009400 (PANTHER); PTHR28580:SF1 (PANTHER); IPR035935 (SUPERFAMILY)	P:GO:0006289; P:GO:0006355; C:GO:0000439	P:nucleotide-excision repair; P:regulation of transcription, DNA-templated; C:transcription factor TFIIH core complex
TRINITY_DN10075_c0_g1_i1	actin-like	1.2092e-76	6	P:GO:0051301; F:GO:0005524; C:GO:0005829; C:GO:0005856; C:GO:0005886; C:GO:0009506	P:cell division; F:ATP binding; C:cytosol; C:cytoskeleton; C:plasma membrane; C:plasmodesma			IPR004000 (PFAM); G3DSA:3.30.420.40 (GENE3D); IPR004000 (PANTHER); PTHR11937:SF400 (PANTHER); IPR043129 (SUPERFAMILY)	no GO terms	no GO terms
TRINITY_DN10076_c0_g1_i1	Staurosporin and temperature sensitive 3-like b	1.98591e-06	11	P:GO:0006486; F:GO:0004576; F:GO:0016740; F:GO:0016757; F:GO:0046872; C:GO:0005634; C:GO:0005783; C:GO:0005789; C:GO:0005886; C:GO:0016020; C:GO:0016021	P:protein glycosylation; F:oligosaccharyl transferase activity; F:transferase activity; F:transferase activity, transferring glycosyl groups; F:metal ion binding; C:nucleus; C:endoplasmic reticulum; C:endoplasmic reticulum membrane; C:plasma membrane; C:membrane; C:integral component of membrane			mobidb-lite (MOBIDB_LITE)	no GO terms	no GO terms
TRINITY_DN10077_c0_g1_i1	RNA binding Plectin/S10 domain-containing protein	3.78258e-73	7	P:GO:0000028; P:GO:2000032; F:GO:0003729; F:GO:0003735; C:GO:0005618; C:GO:0022627; C:GO:0042788	P:ribosomal small subunit assembly; P:regulation of secondary shoot formation; F:mRNA binding; F:structural constituent of ribosome; C:cell wall; C:cytosolic small ribosomal subunit; C:polysomal ribosome			IPR036388 (G3DSA:1.10.10.GENE3D); IPR005326 (PFAM); mobidb-lite (MOBIDB_LITE); mobidb-lite (MOBIDB_LITE); IPR037447 (PANTHER)	no GO terms	no GO terms
TRINITY_DN10077_c0_g1_i2	RNA binding Plectin/S10 domain-containing protein	7.9179e-73	7	P:GO:0000028; P:GO:2000032; F:GO:0003729; F:GO:0003735; C:GO:0005618; C:GO:0022627; C:GO:0042788	P:ribosomal small subunit assembly; P:regulation of secondary shoot formation; F:mRNA binding; F:structural constituent of ribosome; C:cell wall; C:cytosolic small ribosomal subunit; C:polysomal ribosome			IPR005326 (PFAM); IPR036388 (G3DSA:1.10.10.GENE3D); mobidb-lite (MOBIDB_LITE); mobidb-lite (MOBIDB_LITE); IPR037447 (PANTHER)	no GO terms	no GO terms
TRINITY_DN10077_c0_g1_i3	RNA binding Plectin/S10 domain-containing protein	2.80826e-66	6	P:GO:0000028; P:GO:2000032; F:GO:0003729; F:GO:0003735; C:GO:0022627; C:GO:0042788	P:ribosomal small subunit assembly; P:regulation of secondary shoot formation; F:mRNA binding; F:structural constituent of ribosome; C:cytosolic small ribosomal subunit; C:polysomal ribosome			IPR036388 (G3DSA:1.10.10.GENE3D); IPR005326 (PFAM); mobidb-lite (MOBIDB_LITE); mobidb-lite (MOBIDB_LITE); IPR037447 (PANTHER)	no GO terms	no GO terms
TRINITY_DN10077_c0_g1_i4	RNA binding Plectin/S10 domain-containing protein	3.78258e-73	7	P:GO:0000028; P:GO:2000032; F:GO:0003729; F:GO:0003735; C:GO:0005618; C:GO:0022627; C:GO:0042788	P:ribosomal small subunit assembly; P:regulation of secondary shoot formation; F:mRNA binding; F:structural constituent of ribosome; C:cell wall; C:cytosolic small ribosomal subunit; C:polysomal ribosome			IPR036388 (G3DSA:1.10.10.GENE3D); IPR005326 (PFAM); mobidb-lite (MOBIDB_LITE); mobidb-lite (MOBIDB_LITE); IPR037447 (PANTHER)	no GO terms	no GO terms
TRINITY_DN10077_c1_g1_i1	40S ribosomal protein S10-1-like isoform X1	5.64107e-09						no IPS match	no IPS match	no IPS match
TRINITY_DN10077_c1_g1_i2	40S ribosomal protein S10-1-like isoform X1	0.000795505						no IPS match	no IPS match	no IPS match
TRINITY_DN10078_c0_g1_i1	auxin transport protein (BIG)	3.99694e-64	11	P:GO:0009620; P:GO:0009640; P:GO:0009734; P:GO:0009826; P:GO:0009926; P:GO:0010311; P:GO:0048281; F:GO:0008270; C:GO:0005829; C:GO:0009506; C:GO:0016020	P:response to fungus; P:photomorphogenesis; P:auxin-activated signaling pathway; P:unidimensional cell growth; P:auxin polar transport; P:lateral root formation; P:inflorescence morphogenesis; F:zinc ion binding; C:cytosol; C:plasmodesma; C:membrane			PTHR21725:SF1 (PANTHER); PTHR21725 (PANTHER)	no GO terms	no GO terms
TRINITY_DN10079_c0_g1_i1	mitogen-activated protein kinase 4	0	23	P:GO:0000165; P:GO:0000911; P:GO:0006972; P:GO:0007112; P:GO:0009409; P:GO:0009555; P:GO:0009620; P:GO:0009737; P:GO:0009862; P:GO:0009868; P:GO:0010311; P:GO:0010468; P:GO:0042539; P:GO:0043622; P:GO:0071244; P:GO:0090333; F:GO:0004707; F:GO:0005515; F:GO:0005524; C:GO:0005634; C:GO:0005829; C:GO:0005874; C:GO:0009504	P:MAPK cascade; P:cytokinesis by cell plate formation; P:hyperosmotic response; P:male meiosis cytokinesis; P:response to cold; P:pollen development; P:response to fungus; P:response to abscisic acid; P:systemic acquired resistance, salicylic acid mediated signaling pathway; P:jasmonic acid and ethylene-dependent systemic resistance, jasmonic acid mediated signaling pathway; P:lateral root format…	EC:2.7.11.24	Mitogen-activated protein kinase	IPR000719 (PFAM); G3DSA:3.30.200.20 (GENE3D); G3DSA:1.10.510.10 (GENE3D); PIRSF000615 (PIRSF); PTHR24055 (PANTHER); PTHR24055:SF438 (PANTHER); IPR000719 (PROSITE_PROFILES); cd07858 (CDD); IPR011009 (SUPERFAMILY)	P:GO:0006468; F:GO:0004672; F:GO:0005524	P:protein phosphorylation; F:protein kinase activity; F:ATP binding
TRINITY_DN10079_c0_g1_i2	mitogen-activated protein kinase 4	5.19856e-86	23	P:GO:0000165; P:GO:0000911; P:GO:0006972; P:GO:0007112; P:GO:0009409; P:GO:0009555; P:GO:0009620; P:GO:0009737; P:GO:0009862; P:GO:0009868; P:GO:0010311; P:GO:0010468; P:GO:0042539; P:GO:0043622; P:GO:0071244; P:GO:0090333; F:GO:0004707; F:GO:0005515; F:GO:0005524; C:GO:0005634; C:GO:0005829; C:GO:0005874; C:GO:0009504	P:MAPK cascade; P:cytokinesis by cell plate formation; P:hyperosmotic response; P:male meiosis cytokinesis; P:response to cold; P:pollen development; P:response to fungus; P:response to abscisic acid; P:systemic acquired resistance, salicylic acid mediated signaling pathway; P:jasmonic acid and ethylene-dependent systemic resistance, jasmonic acid mediated signaling pathway; P:lateral root format…	EC:2.7.11.24	Mitogen-activated protein kinase	G3DSA:1.10.510.10 (GENE3D); IPR000719 (PFAM); G3DSA:3.30.200.20 (GENE3D); PTHR24055:SF438 (PANTHER); PTHR24055 (PANTHER); IPR000719 (PROSITE_PROFILES); IPR011009 (SUPERFAMILY)	P:GO:0006468; F:GO:0004672; F:GO:0005524	P:protein phosphorylation; F:protein kinase activity; F:ATP binding
TRINITY_DN10079_c0_g1_i3	mitogen-activated protein kinase 4	0	23	P:GO:0000165; P:GO:0000911; P:GO:0006972; P:GO:0007112; P:GO:0009409; P:GO:0009555; P:GO:0009620; P:GO:0009737; P:GO:0009862; P:GO:0009868; P:GO:0010311; P:GO:0010468; P:GO:0042539; P:GO:0043622; P:GO:0071244; P:GO:0090333; F:GO:0004707; F:GO:0005515; F:GO:0005524; C:GO:0005634; C:GO:0005829; C:GO:0005874; C:GO:0009504	P:MAPK cascade; P:cytokinesis by cell plate formation; P:hyperosmotic response; P:male meiosis cytokinesis; P:response to cold; P:pollen development; P:response to fungus; P:response to abscisic acid; P:systemic acquired resistance, salicylic acid mediated signaling pathway; P:jasmonic acid and ethylene-dependent systemic resistance, jasmonic acid mediated signaling pathway; P:lateral root format…	EC:2.7.11.24	Mitogen-activated protein kinase	IPR000719 (PFAM); PIRSF000654 (PIRSF); G3DSA:1.10.510.10 (GENE3D); G3DSA:3.30.200.20 (GENE3D); PTHR24055:SF438 (PANTHER); PTHR24055 (PANTHER); IPR000719 (PROSITE_PROFILES); IPR011009 (SUPERFAMILY)	P:GO:0006468; F:GO:0004672; F:GO:0005524	P:protein phosphorylation; F:protein kinase activity; F:ATP binding
TRINITY_DN10079_c0_g1_i4	mitogen-activated protein kinase 4	0	23	P:GO:0000165; P:GO:0000911; P:GO:0006972; P:GO:0007112; P:GO:0009409; P:GO:0009555; P:GO:0009620; P:GO:0009737; P:GO:0009862; P:GO:0009868; P:GO:0010311; P:GO:0010468; P:GO:0042539; P:GO:0043622; P:GO:0071244; P:GO:0090333; F:GO:0004707; F:GO:0005515; F:GO:0005524; C:GO:0005634; C:GO:0005829; C:GO:0005874; C:GO:0009504	P:MAPK cascade; P:cytokinesis by cell plate formation; P:hyperosmotic response; P:male meiosis cytokinesis; P:response to cold; P:pollen development; P:response to fungus; P:response to abscisic acid; P:systemic acquired resistance, salicylic acid mediated signaling pathway; P:jasmonic acid and ethylene-dependent systemic resistance, jasmonic acid mediated signaling pathway; P:lateral root format…	EC:2.7.11.24	Mitogen-activated protein kinase	G3DSA:1.10.510.10 (GENE3D); IPR000719 (PFAM); G3DSA:3.30.200.20 (GENE3D); PIRSF000615 (PIRSF); PTHR24055 (PANTHER); PTHR24055:SF438 (PANTHER); IPR000719 (PROSITE_PROFILES); cd07858 (CDD); IPR011009 (SUPERFAMILY)	P:GO:0006468; F:GO:0004672; F:GO:0005524	P:protein phosphorylation; F:protein kinase activity; F:ATP binding
TRINITY_DN10079_c0_g1_i5	mitogen-activated protein kinase 4	5.23465e-144	23	P:GO:0000165; P:GO:0000911; P:GO:0006972; P:GO:0007112; P:GO:0009409; P:GO:0009555; P:GO:0009620; P:GO:0009737; P:GO:0009862; P:GO:0009868; P:GO:0010311; P:GO:0010468; P:GO:0042539; P:GO:0043622; P:GO:0071244; P:GO:0090333; F:GO:0004707; F:GO:0005515; F:GO:0005524; C:GO:0005634; C:GO:0005829; C:GO:0005874; C:GO:0009504	P:MAPK cascade; P:cytokinesis by cell plate formation; P:hyperosmotic response; P:male meiosis cytokinesis; P:response to cold; P:pollen development; P:response to fungus; P:response to abscisic acid; P:systemic acquired resistance, salicylic acid mediated signaling pathway; P:jasmonic acid and ethylene-dependent systemic resistance, jasmonic acid mediated signaling pathway; P:lateral root format…	EC:2.7.11.24	Mitogen-activated protein kinase	G3DSA:1.10.510.10 (GENE3D); IPR000719 (PFAM); G3DSA:3.30.200.20 (GENE3D); PTHR24055:SF438 (PANTHER); PTHR24055 (PANTHER); IPR000719 (PROSITE_PROFILES); IPR011009 (SUPERFAMILY)	P:GO:0006468; F:GO:0004672; F:GO:0005524	P:protein phosphorylation; F:protein kinase activity; F:ATP binding
TRINITY_DN10079_c0_g1_i6	mitogen-activated protein kinase 4	0	23	P:GO:0000165; P:GO:0000911; P:GO:0006972; P:GO:0007112; P:GO:0009409; P:GO:0009555; P:GO:0009620; P:GO:0009737; P:GO:0009862; P:GO:0009868; P:GO:0010311; P:GO:0010468; P:GO:0042539; P:GO:0043622; P:GO:0071244; P:GO:0090333; F:GO:0004707; F:GO:0005515; F:GO:0005524; C:GO:0005634; C:GO:0005829; C:GO:0005874; C:GO:0009504	P:MAPK cascade; P:cytokinesis by cell plate formation; P:hyperosmotic response; P:male meiosis cytokinesis; P:response to cold; P:pollen development; P:response to fungus; P:response to abscisic acid; P:systemic acquired resistance, salicylic acid mediated signaling pathway; P:jasmonic acid and ethylene-dependent systemic resistance, jasmonic acid mediated signaling pathway; P:lateral root format…	EC:2.7.11.24	Mitogen-activated protein kinase	G3DSA:1.10.510.10 (GENE3D); PIRSF000654 (PIRSF); IPR000719 (PFAM); G3DSA:3.30.200.20 (GENE3D); PTHR24055 (PANTHER); PTHR24055:SF438 (PANTHER); IPR000719 (PROSITE_PROFILES); cd07858 (CDD); IPR011009 (SUPERFAMILY)	P:GO:0006468; F:GO:0004672; F:GO:0005524	P:protein phosphorylation; F:protein kinase activity; F:ATP binding
TRINITY_DN10079_c0_g1_i7	mitogen-activated protein kinase 4	0	23	P:GO:0000165; P:GO:0000911; P:GO:0006972; P:GO:0007112; P:GO:0009409; P:GO:0009555; P:GO:0009620; P:GO:0009737; P:GO:0009862; P:GO:0009868; P:GO:0010311; P:GO:0010468; P:GO:0042539; P:GO:0043622; P:GO:0071244; P:GO:0090333; F:GO:0004707; F:GO:0005515; F:GO:0005524; C:GO:0005634; C:GO:0005829; C:GO:0005874; C:GO:0009504	P:MAPK cascade; P:cytokinesis by cell plate formation; P:hyperosmotic response; P:male meiosis cytokinesis; P:response to cold; P:pollen development; P:response to fungus; P:response to abscisic acid; P:systemic acquired resistance, salicylic acid mediated signaling pathway; P:jasmonic acid and ethylene-dependent systemic resistance, jasmonic acid mediated signaling pathway; P:lateral root format…	EC:2.7.11.24	Mitogen-activated protein kinase	G3DSA:1.10.510.10 (GENE3D); IPR000719 (PFAM); G3DSA:3.30.200.20 (GENE3D); PIRSF000615 (PIRSF); PTHR24055 (PANTHER); PTHR24055:SF438 (PANTHER); IPR000719 (PROSITE_PROFILES); cd07858 (CDD); IPR011009 (SUPERFAMILY)	P:GO:0006468; F:GO:0004672; F:GO:0005524	P:protein phosphorylation; F:protein kinase activity; F:ATP binding
TRINITY_DN10079_c0_g1_i8	mitogen-activated protein kinase 4	0	23	P:GO:0000165; P:GO:0000911; P:GO:0006972; P:GO:0007112; P:GO:0009409; P:GO:0009555; P:GO:0009620; P:GO:0009737; P:GO:0009862; P:GO:0009868; P:GO:0010311; P:GO:0010468; P:GO:0042539; P:GO:0043622; P:GO:0071244; P:GO:0090333; F:GO:0004707; F:GO:0005515; F:GO:0005524; C:GO:0005634; C:GO:0005829; C:GO:0005874; C:GO:0009504	P:MAPK cascade; P:cytokinesis by cell plate formation; P:hyperosmotic response; P:male meiosis cytokinesis; P:response to cold; P:pollen development; P:response to fungus; P:response to abscisic acid; P:systemic acquired resistance, salicylic acid mediated signaling pathway; P:jasmonic acid and ethylene-dependent systemic resistance, jasmonic acid mediated signaling pathway; P:lateral root format…	EC:2.7.11.24	Mitogen-activated protein kinase	G3DSA:3.30.200.20 (GENE3D); G3DSA:1.10.510.10 (GENE3D); PIRSF000615 (PIRSF); IPR000719 (PFAM); PTHR24055 (PANTHER); PTHR24055:SF438 (PANTHER); IPR000719 (PROSITE_PROFILES); cd07858 (CDD); IPR011009 (SUPERFAMILY)	P:GO:0006468; F:GO:0004672; F:GO:0005524	P:protein phosphorylation; F:protein kinase activity; F:ATP binding
TRINITY_DN10079_c0_g1_i9	mitogen-activated protein kinase 4	0	23	P:GO:0000165; P:GO:0000911; P:GO:0006972; P:GO:0007112; P:GO:0009409; P:GO:0009555; P:GO:0009620; P:GO:0009737; P:GO:0009862; P:GO:0009868; P:GO:0010311; P:GO:0010468; P:GO:0042539; P:GO:0043622; P:GO:0071244; P:GO:0090333; F:GO:0004707; F:GO:0005515; F:GO:0005524; C:GO:0005634; C:GO:0005829; C:GO:0005874; C:GO:0009504	P:MAPK cascade; P:cytokinesis by cell plate formation; P:hyperosmotic response; P:male meiosis cytokinesis; P:response to cold; P:pollen development; P:response to fungus; P:response to abscisic acid; P:systemic acquired resistance, salicylic acid mediated signaling pathway; P:jasmonic acid and ethylene-dependent systemic resistance, jasmonic acid mediated signaling pathway; P:lateral root format…	EC:2.7.11.24	Mitogen-activated protein kinase	G3DSA:3.30.200.20 (GENE3D); G3DSA:1.10.510.10 (GENE3D); PIRSF000615 (PIRSF); IPR000719 (PFAM); PTHR24055:SF438 (PANTHER); PTHR24055 (PANTHER); IPR000719 (PROSITE_PROFILES); cd07858 (CDD); IPR011009 (SUPERFAMILY)	P:GO:0006468; F:GO:0004672; F:GO:0005524	P:protein phosphorylation; F:protein kinase activity; F:ATP binding
TRINITY_DN10079_c2_g1_i1	---NA---							no IPS match	no IPS match	no IPS match
TRINITY_DN1008_c0_g1_i1	CASP-like protein 4A1	2.75946e-161	3	F:GO:0051539; C:GO:0005886; C:GO:0016021	F:4 iron, 4 sulfur cluster binding; C:plasma membrane; C:integral component of membrane			IPR006702 (PFAM); PTHR11615 (PANTHER); PTHR11615:SF279 (PANTHER)	no GO terms	no GO terms
TRINITY_DN1008_c0_g1_i10	CASP-like protein 4A1	1.52158e-76	3	F:GO:0051539; C:GO:0005886; C:GO:0016021	F:4 iron, 4 sulfur cluster binding; C:plasma membrane; C:integral component of membrane			IPR006702 (PFAM); PTHR11615 (PANTHER); PTHR11615:SF279 (PANTHER)	no GO terms	no GO terms
TRINITY_DN1008_c0_g1_i11	CASP-like protein 4A1	1.06419e-134	3	F:GO:0051539; C:GO:0005886; C:GO:0016021	F:4 iron, 4 sulfur cluster binding; C:plasma membrane; C:integral component of membrane			IPR006702 (PFAM); PTHR11615:SF279 (PANTHER); PTHR11615 (PANTHER)	no GO terms	no GO terms
TRINITY_DN1008_c0_g1_i12	CASP-like protein 4A1	9.7553e-118	3	F:GO:0051539; C:GO:0005886; C:GO:0016021	F:4 iron, 4 sulfur cluster binding; C:plasma membrane; C:integral component of membrane			IPR006702 (PFAM); mobidb-lite (MOBIDB_LITE); mobidb-lite (MOBIDB_LITE); mobidb-lite (MOBIDB_LITE); mobidb-lite (MOBIDB_LITE); PTHR11615:SF279 (PANTHER); PTHR11615 (PANTHER)	no GO terms	no GO terms
TRINITY_DN1008_c0_g1_i13	CASP-like protein 4A1	1.65831e-126	3	F:GO:0051539; C:GO:0005886; C:GO:0016021	F:4 iron, 4 sulfur cluster binding; C:plasma membrane; C:integral component of membrane			IPR006702 (PFAM); mobidb-lite (MOBIDB_LITE); mobidb-lite (MOBIDB_LITE); mobidb-lite (MOBIDB_LITE); mobidb-lite (MOBIDB_LITE); PTHR11615 (PANTHER); PTHR11615:SF279 (PANTHER)	no GO terms	no GO terms
TRINITY_DN1008_c0_g1_i14	CASP-like protein 4A1	2.64894e-112	3	F:GO:0051539; C:GO:0005886; C:GO:0016021	F:4 iron, 4 sulfur cluster binding; C:plasma membrane; C:integral component of membrane			IPR006702 (PFAM); mobidb-lite (MOBIDB_LITE); mobidb-lite (MOBIDB_LITE); mobidb-lite (MOBIDB_LITE); mobidb-lite (MOBIDB_LITE); PTHR11615:SF279 (PANTHER); PTHR11615 (PANTHER)	no GO terms	no GO terms
TRINITY_DN1008_c0_g1_i16	CASP-like protein 4A1	7.9799e-62	3	F:GO:0051539; C:GO:0005886; C:GO:0016021	F:4 iron, 4 sulfur cluster binding; C:plasma membrane; C:integral component of membrane			mobidb-lite (MOBIDB_LITE); mobidb-lite (MOBIDB_LITE); mobidb-lite (MOBIDB_LITE); mobidb-lite (MOBIDB_LITE); PTHR11615 (PANTHER); PTHR11615:SF279 (PANTHER)	no GO terms	no GO terms
TRINITY_DN1008_c0_g1_i17	CASP-like protein 4A1	6.39123e-84	3	F:GO:0051539; C:GO:0005886; C:GO:0016021	F:4 iron, 4 sulfur cluster binding; C:plasma membrane; C:integral component of membrane			IPR006702 (PFAM); PTHR11615:SF279 (PANTHER); PTHR11615 (PANTHER)	no GO terms	no GO terms
TRINITY_DN1008_c0_g1_i18	CASP-like protein 4A1	9.79999e-65	3	F:GO:0051539; C:GO:0005886; C:GO:0016021	F:4 iron, 4 sulfur cluster binding; C:plasma membrane; C:integral component of membrane			mobidb-lite (MOBIDB_LITE); mobidb-lite (MOBIDB_LITE); mobidb-lite (MOBIDB_LITE); mobidb-lite (MOBIDB_LITE); PTHR11615:SF279 (PANTHER); PTHR11615 (PANTHER)	no GO terms	no GO terms
TRINITY_DN1008_c0_g1_i2	CASP-like protein 4A1	2.93835e-134	3	F:GO:0051539; C:GO:0005886; C:GO:0016021	F:4 iron, 4 sulfur cluster binding; C:plasma membrane; C:integral component of membrane			IPR006702 (PFAM); mobidb-lite (MOBIDB_LITE); mobidb-lite (MOBIDB_LITE); mobidb-lite (MOBIDB_LITE); mobidb-lite (MOBIDB_LITE); PTHR11615 (PANTHER); PTHR11615:SF279 (PANTHER)	no GO terms	no GO terms
TRINITY_DN1008_c0_g1_i3	CASP-like protein 4A1	7.8139e-57	3	F:GO:0051539; C:GO:0005886; C:GO:0016021	F:4 iron, 4 sulfur cluster binding; C:plasma membrane; C:integral component of membrane			IPR006702 (PFAM); PTHR11615 (PANTHER); PTHR11615:SF279 (PANTHER)	no GO terms	no GO terms
TRINITY_DN1008_c0_g1_i4	CASP-like protein 4A1	1.15206e-134	3	F:GO:0051539; C:GO:0005886; C:GO:0016021	F:4 iron, 4 sulfur cluster binding; C:plasma membrane; C:integral component of membrane			IPR006702 (PFAM); mobidb-lite (MOBIDB_LITE); mobidb-lite (MOBIDB_LITE); mobidb-lite (MOBIDB_LITE); mobidb-lite (MOBIDB_LITE); PTHR11615 (PANTHER); PTHR11615:SF279 (PANTHER)	no GO terms	no GO terms
TRINITY_DN1008_c0_g1_i5	CASP-like protein 4A1	1.46093e-72	3	F:GO:0051539; C:GO:0005886; C:GO:0016021	F:4 iron, 4 sulfur cluster binding; C:plasma membrane; C:integral component of membrane			IPR006702 (PFAM); mobidb-lite (MOBIDB_LITE); PTHR11615 (PANTHER); PTHR11615:SF279 (PANTHER)	no GO terms	no GO terms
TRINITY_DN1008_c0_g1_i6	CASP-like protein 4A1	2.30474e-51	5	P:GO:0006629; F:GO:0016787; F:GO:0051539; C:GO:0005886; C:GO:0016021	P:lipid metabolic process; F:hydrolase activity; F:4 iron, 4 sulfur cluster binding; C:plasma membrane; C:integral component of membrane			mobidb-lite (MOBIDB_LITE); mobidb-lite (MOBIDB_LITE); mobidb-lite (MOBIDB_LITE); mobidb-lite (MOBIDB_LITE); PTHR11615:SF279 (PANTHER); PTHR11615 (PANTHER)	no GO terms	no GO terms
TRINITY_DN1008_c0_g1_i7	CASP-like protein 4A1	1.28664e-135	3	F:GO:0051539; C:GO:0005886; C:GO:0016021	F:4 iron, 4 sulfur cluster binding; C:plasma membrane; C:integral component of membrane			IPR006702 (PFAM); mobidb-lite (MOBIDB_LITE); mobidb-lite (MOBIDB_LITE); mobidb-lite (MOBIDB_LITE); mobidb-lite (MOBIDB_LITE); PTHR11615 (PANTHER); PTHR11615:SF279 (PANTHER)	no GO terms	no GO terms
TRINITY_DN1008_c0_g1_i8	CASP-like protein 4A1	1.52433e-137	3	F:GO:0051539; C:GO:0005886; C:GO:0016021	F:4 iron, 4 sulfur cluster binding; C:plasma membrane; C:integral component of membrane			IPR006702 (PFAM); mobidb-lite (MOBIDB_LITE); mobidb-lite (MOBIDB_LITE); mobidb-lite (MOBIDB_LITE); mobidb-lite (MOBIDB_LITE); PTHR11615:SF279 (PANTHER); PTHR11615 (PANTHER)	no GO terms	no GO terms
TRINITY_DN1008_c0_g1_i9	CASP-like protein 4A1	1.34299e-131	3	F:GO:0051539; C:GO:0005886; C:GO:0016021	F:4 iron, 4 sulfur cluster binding; C:plasma membrane; C:integral component of membrane			IPR006702 (PFAM); mobidb-lite (MOBIDB_LITE); mobidb-lite (MOBIDB_LITE); mobidb-lite (MOBIDB_LITE); mobidb-lite (MOBIDB_LITE); PTHR11615 (PANTHER); PTHR11615:SF279 (PANTHER)	no GO terms	no GO terms
TRINITY_DN10080_c0_g1_i1	plasma membrane intrinsic protein 2A	6.47975e-67	12	P:GO:0006833; P:GO:0009414; P:GO:0009737; P:GO:0048767; P:GO:0080170; F:GO:0003729; F:GO:0015250; F:GO:0031625; C:GO:0005773; C:GO:0005886; C:GO:0009506; C:GO:0016021	P:water transport; P:response to water deprivation; P:response to abscisic acid; P:root hair elongation; P:hydrogen peroxide transmembrane transport; F:mRNA binding; F:water channel activity; F:ubiquitin protein ligase binding; C:vacuole; C:plasma membrane; C:plasmodesma; C:integral component of membrane			IPR000425 (PRINTS); IPR000425 (PFAM); IPR023271 (G3DSA:1.20.1080.GENE3D); IPR034294 (PANTHER); PTHR45687:SF2 (PANTHER); IPR023271 (SUPERFAMILY)	P:GO:0055085; F:GO:0015267; C:GO:0016020	P:transmembrane transport; F:channel activity; C:membrane
TRINITY_DN10080_c0_g1_i2	plasma membrane intrinsic protein 2A	3.89277e-52	10	P:GO:0006833; P:GO:0009414; P:GO:0009737; P:GO:0080170; F:GO:0003729; F:GO:0015250; F:GO:0031625; C:GO:0005773; C:GO:0005886; C:GO:0009506	P:water transport; P:response to water deprivation; P:response to abscisic acid; P:hydrogen peroxide transmembrane transport; F:mRNA binding; F:water channel activity; F:ubiquitin protein ligase binding; C:vacuole; C:plasma membrane; C:plasmodesma			IPR000425 (PFAM); IPR023271 (G3DSA:1.20.1080.GENE3D); mobidb-lite (MOBIDB_LITE); PTHR45687:SF2 (PANTHER); IPR034294 (PANTHER)	P:GO:0055085; F:GO:0015267; C:GO:0016020	P:transmembrane transport; F:channel activity; C:membrane
TRINITY_DN10081_c0_g1_i1	Haloacid dehalogenase-like hydrolase (HAD) superfamily protein	2.4528e-32	2	P:GO:0006470; F:GO:0004721	P:protein dephosphorylation; F:phosphoprotein phosphatase activity	EC:3.1.3.16	Protein-serine/threonine phosphatase	PTHR12210:SF134 (PANTHER); PTHR12210 (PANTHER)	no GO terms	no GO terms
TRINITY_DN10082_c0_g1_i1	serine/threonine-protein kinase tricorner-like isoform X1	0	4	P:GO:0018105; P:GO:0035556; F:GO:0004674; F:GO:0005524	P:peptidyl-serine phosphorylation; P:intracellular signal transduction; F:protein serine/threonine kinase activity; F:ATP binding			IPR017892 (PFAM); G3DSA:1.10.510.10 (GENE3D); IPR000719 (PFAM); G3DSA:3.30.200.20 (GENE3D); mobidb-lite (MOBIDB_LITE); mobidb-lite (MOBIDB_LITE); mobidb-lite (MOBIDB_LITE); mobidb-lite (MOBIDB_LITE); mobidb-lite (MOBIDB_LITE); PTHR24356 (PANTHER); PTHR24356:SF337 (PANTHER); IPR000719 (PROSITE_PROFILES); IPR000961 (PROSITE_PROFILES); cd05599 (CDD); IPR011009 (SUPERFAMILY)	P:GO:0006468; F:GO:0004672; F:GO:0004674; F:GO:0005524	P:protein phosphorylation; F:protein kinase activity; F:protein serine/threonine kinase activity; F:ATP binding
TRINITY_DN10082_c0_g1_i2	serine/threonine-protein kinase tricorner-like isoform X1	0	4	P:GO:0018105; P:GO:0035556; F:GO:0004674; F:GO:0005524	P:peptidyl-serine phosphorylation; P:intracellular signal transduction; F:protein serine/threonine kinase activity; F:ATP binding			G3DSA:3.30.200.20 (GENE3D); IPR017892 (PFAM); G3DSA:1.10.510.10 (GENE3D); IPR000719 (PFAM); mobidb-lite (MOBIDB_LITE); mobidb-lite (MOBIDB_LITE); mobidb-lite (MOBIDB_LITE); mobidb-lite (MOBIDB_LITE); PTHR24356 (PANTHER); PTHR24356:SF337 (PANTHER); IPR000961 (PROSITE_PROFILES); IPR000719 (PROSITE_PROFILES); cd05599 (CDD); IPR011009 (SUPERFAMILY)	P:GO:0006468; F:GO:0004672; F:GO:0004674; F:GO:0005524	P:protein phosphorylation; F:protein kinase activity; F:protein serine/threonine kinase activity; F:ATP binding
TRINITY_DN10082_c0_g1_i3	serine/threonine-protein kinase tricorner-like isoform X1	0	4	P:GO:0018105; P:GO:0035556; F:GO:0004674; F:GO:0005524	P:peptidyl-serine phosphorylation; P:intracellular signal transduction; F:protein serine/threonine kinase activity; F:ATP binding			G3DSA:1.10.510.10 (GENE3D); IPR017892 (PFAM); G3DSA:3.30.200.20 (GENE3D); IPR000719 (PFAM); mobidb-lite (MOBIDB_LITE); mobidb-lite (MOBIDB_LITE); mobidb-lite (MOBIDB_LITE); mobidb-lite (MOBIDB_LITE); PTHR24356:SF337 (PANTHER); PTHR24356 (PANTHER); IPR000719 (PROSITE_PROFILES); IPR000961 (PROSITE_PROFILES); cd05599 (CDD); IPR011009 (SUPERFAMILY)	P:GO:0006468; F:GO:0004672; F:GO:0004674; F:GO:0005524	P:protein phosphorylation; F:protein kinase activity; F:protein serine/threonine kinase activity; F:ATP binding
TRINITY_DN10082_c0_g1_i4	serine/threonine-protein kinase tricorner-like isoform X1	0	4	P:GO:0018105; P:GO:0035556; F:GO:0004674; F:GO:0005524	P:peptidyl-serine phosphorylation; P:intracellular signal transduction; F:protein serine/threonine kinase activity; F:ATP binding			G3DSA:1.10.510.10 (GENE3D); IPR017892 (PFAM); G3DSA:3.30.200.20 (GENE3D); IPR000719 (PFAM); mobidb-lite (MOBIDB_LITE); mobidb-lite (MOBIDB_LITE); mobidb-lite (MOBIDB_LITE); mobidb-lite (MOBIDB_LITE); PTHR24356:SF337 (PANTHER); PTHR24356 (PANTHER); IPR000719 (PROSITE_PROFILES); IPR000961 (PROSITE_PROFILES); cd05599 (CDD); IPR011009 (SUPERFAMILY)	P:GO:0006468; F:GO:0004672; F:GO:0004674; F:GO:0005524	P:protein phosphorylation; F:protein kinase activity; F:protein serine/threonine kinase activity; F:ATP binding
TRINITY_DN10082_c0_g1_i5	serine/threonine-protein kinase tricorner-like isoform X1	0	4	P:GO:0018105; P:GO:0035556; F:GO:0004674; F:GO:0005524	P:peptidyl-serine phosphorylation; P:intracellular signal transduction; F:protein serine/threonine kinase activity; F:ATP binding			G3DSA:3.30.200.20 (GENE3D); G3DSA:1.10.510.10 (GENE3D); IPR000719 (PFAM); IPR017892 (PFAM); mobidb-lite (MOBIDB_LITE); mobidb-lite (MOBIDB_LITE); mobidb-lite (MOBIDB_LITE); mobidb-lite (MOBIDB_LITE); PTHR24356:SF337 (PANTHER); PTHR24356 (PANTHER); IPR000961 (PROSITE_PROFILES); IPR000719 (PROSITE_PROFILES); cd05599 (CDD); IPR011009 (SUPERFAMILY)	P:GO:0006468; F:GO:0004672; F:GO:0004674; F:GO:0005524	P:protein phosphorylation; F:protein kinase activity; F:protein serine/threonine kinase activity; F:ATP binding
TRINITY_DN10082_c0_g1_i6	serine/threonine-protein kinase tricorner-like isoform X1	0	4	P:GO:0018105; P:GO:0035556; F:GO:0004674; F:GO:0005524	P:peptidyl-serine phosphorylation; P:intracellular signal transduction; F:protein serine/threonine kinase activity; F:ATP binding			IPR000719 (PFAM); IPR017892 (PFAM); G3DSA:3.30.200.20 (GENE3D); G3DSA:1.10.510.10 (GENE3D); mobidb-lite (MOBIDB_LITE); mobidb-lite (MOBIDB_LITE); PTHR24356 (PANTHER); PTHR24356:SF337 (PANTHER); IPR000719 (PROSITE_PROFILES); IPR000961 (PROSITE_PROFILES); cd05599 (CDD); IPR011009 (SUPERFAMILY)	P:GO:0006468; F:GO:0004672; F:GO:0004674; F:GO:0005524	P:protein phosphorylation; F:protein kinase activity; F:protein serine/threonine kinase activity; F:ATP binding
TRINITY_DN10082_c0_g1_i7	serine/threonine-protein kinase tricorner-like isoform X1	0	4	P:GO:0018105; P:GO:0035556; F:GO:0004674; F:GO:0005524	P:peptidyl-serine phosphorylation; P:intracellular signal transduction; F:protein serine/threonine kinase activity; F:ATP binding			IPR000719 (PFAM); IPR017892 (PFAM); G3DSA:3.30.200.20 (GENE3D); G3DSA:1.10.510.10 (GENE3D); mobidb-lite (MOBIDB_LITE); mobidb-lite (MOBIDB_LITE); PTHR24356 (PANTHER); PTHR24356:SF337 (PANTHER); IPR000961 (PROSITE_PROFILES); IPR000719 (PROSITE_PROFILES); cd05599 (CDD); IPR011009 (SUPERFAMILY)	P:GO:0006468; F:GO:0004672; F:GO:0004674; F:GO:0005524	P:protein phosphorylation; F:protein kinase activity; F:protein serine/threonine kinase activity; F:ATP binding
TRINITY_DN10082_c0_g1_i8	serine/threonine-protein kinase tricorner-like isoform X1	0	4	P:GO:0018105; P:GO:0035556; F:GO:0004674; F:GO:0005524	P:peptidyl-serine phosphorylation; P:intracellular signal transduction; F:protein serine/threonine kinase activity; F:ATP binding			G3DSA:3.30.200.20 (GENE3D); G3DSA:1.10.510.10 (GENE3D); IPR000719 (PFAM); IPR017892 (PFAM); mobidb-lite (MOBIDB_LITE); mobidb-lite (MOBIDB_LITE); mobidb-lite (MOBIDB_LITE); mobidb-lite (MOBIDB_LITE); PTHR24356:SF337 (PANTHER); PTHR24356 (PANTHER); IPR000961 (PROSITE_PROFILES); IPR000719 (PROSITE_PROFILES); cd05599 (CDD); IPR011009 (SUPERFAMILY)	P:GO:0006468; F:GO:0004672; F:GO:0004674; F:GO:0005524	P:protein phosphorylation; F:protein kinase activity; F:protein serine/threonine kinase activity; F:ATP binding
TRINITY_DN10083_c0_g1_i1	probable LRR receptor-like serine/threonine-protein kinase At2g23950	2.12281e-27						no IPS match	no IPS match	no IPS match
TRINITY_DN10083_c0_g1_i2	probable LRR receptor-like serine/threonine-protein kinase At2g23950	7.58568e-23						no IPS match	no IPS match	no IPS match
TRINITY_DN10085_c0_g1_i1	probable galacturonosyltransferase 4 isoform X1	8.71681e-05						no IPS match	no IPS match	no IPS match
TRINITY_DN10086_c0_g1_i2	reticulata-like protein, putative (DUF3411)	3.303e-42	6	P:GO:0009648; P:GO:0009658; P:GO:0048366; C:GO:0005739; C:GO:0009706; C:GO:0016021	P:photoperiodism; P:chloroplast organization; P:leaf development; C:mitochondrion; C:chloroplast inner membrane; C:integral component of membrane			IPR021825 (PFAM); PTHR31038 (PANTHER); PTHR31038:SF11 (PANTHER)	no GO terms	no GO terms
TRINITY_DN10086_c0_g1_i3	reticulata-like protein, putative (DUF3411)	2.41548e-06	15	P:GO:0000302; P:GO:0007275; P:GO:0009648; P:GO:0009658; P:GO:0048366; P:GO:0099402; C:GO:0005739; C:GO:0005783; C:GO:0009507; C:GO:0009536; C:GO:0009706; C:GO:0009941; C:GO:0016020; C:GO:0016021; C:GO:0031969	P:response to reactive oxygen species; P:multicellular organism development; P:photoperiodism; P:chloroplast organization; P:leaf development; P:plant organ development; C:mitochondrion; C:endoplasmic reticulum; C:chloroplast; C:plastid; C:chloroplast inner membrane; C:chloroplast envelope; C:membrane; C:integral component of membrane; C:chloroplast membrane			no IPS match	no IPS match	no IPS match
TRINITY_DN10086_c0_g1_i4	reticulata-like protein, putative (DUF3411)	1.01355e-41	6	P:GO:0009648; P:GO:0009658; P:GO:0048366; C:GO:0005739; C:GO:0009706; C:GO:0016021	P:photoperiodism; P:chloroplast organization; P:leaf development; C:mitochondrion; C:chloroplast inner membrane; C:integral component of membrane			IPR021825 (PFAM); PTHR31038:SF11 (PANTHER); PTHR31038 (PANTHER)	no GO terms	no GO terms
TRINITY_DN10086_c0_g1_i5	reticulata-like protein, putative (DUF3411)	2.15246e-13	6	P:GO:0009648; P:GO:0009658; P:GO:0048366; C:GO:0005739; C:GO:0009706; C:GO:0016021	P:photoperiodism; P:chloroplast organization; P:leaf development; C:mitochondrion; C:chloroplast inner membrane; C:integral component of membrane			no IPS match	no IPS match	no IPS match
TRINITY_DN10086_c0_g1_i7	reticulata-like protein, putative (DUF3411)	1.34942e-21	6	P:GO:0009648; P:GO:0009658; P:GO:0048366; C:GO:0005739; C:GO:0009706; C:GO:0016021	P:photoperiodism; P:chloroplast organization; P:leaf development; C:mitochondrion; C:chloroplast inner membrane; C:integral component of membrane			IPR021825 (PFAM); PTHR31038:SF11 (PANTHER); PTHR31038 (PANTHER)	no GO terms	no GO terms
TRINITY_DN10086_c0_g1_i8	reticulata-like protein, putative (DUF3411)	1.3044e-07	4	P:GO:0099402; C:GO:0005739; C:GO:0009706; C:GO:0016021	P:plant organ development; C:mitochondrion; C:chloroplast inner membrane; C:integral component of membrane			no IPS match	no IPS match	no IPS match
TRINITY_DN10086_c0_g1_i9	reticulata-like protein, putative (DUF3411)	1.60775e-22	6	P:GO:0009648; P:GO:0009658; P:GO:0048366; C:GO:0005739; C:GO:0009706; C:GO:0016021	P:photoperiodism; P:chloroplast organization; P:leaf development; C:mitochondrion; C:chloroplast inner membrane; C:integral component of membrane			IPR021825 (PFAM); PTHR31038:SF11 (PANTHER); PTHR31038 (PANTHER)	no GO terms	no GO terms
TRINITY_DN10086_c0_g2_i1	reticulata-like protein, putative (DUF3411)	0.000147432	15	P:GO:0000302; P:GO:0007275; P:GO:0009648; P:GO:0009658; P:GO:0048366; P:GO:0099402; C:GO:0005739; C:GO:0005783; C:GO:0009507; C:GO:0009536; C:GO:0009706; C:GO:0009941; C:GO:0016020; C:GO:0016021; C:GO:0031969	P:response to reactive oxygen species; P:multicellular organism development; P:photoperiodism; P:chloroplast organization; P:leaf development; P:plant organ development; C:mitochondrion; C:endoplasmic reticulum; C:chloroplast; C:plastid; C:chloroplast inner membrane; C:chloroplast envelope; C:membrane; C:integral component of membrane; C:chloroplast membrane			no IPS match	no IPS match	no IPS match
TRINITY_DN10087_c0_g1_i1	aspartic proteinase-like protein 2 isoform X2	2.6017e-28	5	P:GO:0006508; P:GO:0030163; F:GO:0004190; C:GO:0016021; C:GO:0031225	P:proteolysis; P:protein catabolic process; F:aspartic-type endopeptidase activity; C:integral component of membrane; C:anchored component of membrane	EC:3.4.23	Acting on peptide bonds (peptidases)	IPR021109 (G3DSA:2.40.70.GENE3D); PTHR13683:SF685 (PANTHER); IPR001461 (PANTHER); IPR033121 (PROSITE_PROFILES); IPR021109 (SUPERFAMILY)	P:GO:0006508; F:GO:0004190	P:proteolysis; F:aspartic-type endopeptidase activity
TRINITY_DN10088_c0_g1_i1	PGR5-like A protein	0	4	P:GO:0009773; F:GO:0016730; C:GO:0009535; C:GO:0016021	P:photosynthetic electron transport in photosystem I; F:oxidoreductase activity, acting on iron-sulfur proteins as donors; C:chloroplast thylakoid membrane; C:integral component of membrane			PTHR31032:SF2 (PANTHER); IPR039987 (PANTHER)	P:GO:0009773; F:GO:0016730; C:GO:0009535	P:photosynthetic electron transport in photosystem I; F:oxidoreductase activity, acting on iron-sulfur proteins as donors; C:chloroplast thylakoid membrane
TRINITY_DN10088_c0_g1_i2	PGR5-like A protein	3.10018e-43	4	P:GO:0009773; F:GO:0016730; C:GO:0009535; C:GO:0016021	P:photosynthetic electron transport in photosystem I; F:oxidoreductase activity, acting on iron-sulfur proteins as donors; C:chloroplast thylakoid membrane; C:integral component of membrane			IPR039987 (PANTHER); PTHR31032:SF2 (PANTHER)	P:GO:0009773; F:GO:0016730; C:GO:0009535	P:photosynthetic electron transport in photosystem I; F:oxidoreductase activity, acting on iron-sulfur proteins as donors; C:chloroplast thylakoid membrane
TRINITY_DN10088_c0_g1_i3	PGR5-like A protein	1.38636e-90	4	P:GO:0009773; F:GO:0016730; C:GO:0009535; C:GO:0016021	P:photosynthetic electron transport in photosystem I; F:oxidoreductase activity, acting on iron-sulfur proteins as donors; C:chloroplast thylakoid membrane; C:integral component of membrane			PTHR31032:SF2 (PANTHER); IPR039987 (PANTHER)	P:GO:0009773; F:GO:0016730; C:GO:0009535	P:photosynthetic electron transport in photosystem I; F:oxidoreductase activity, acting on iron-sulfur proteins as donors; C:chloroplast thylakoid membrane
TRINITY_DN10088_c0_g1_i4	PGR5-like A protein	1.36589e-44	4	P:GO:0009773; F:GO:0016730; C:GO:0009535; C:GO:0016021	P:photosynthetic electron transport in photosystem I; F:oxidoreductase activity, acting on iron-sulfur proteins as donors; C:chloroplast thylakoid membrane; C:integral component of membrane			IPR039987 (PANTHER); PTHR31032:SF2 (PANTHER)	P:GO:0009773; F:GO:0016730; C:GO:0009535	P:photosynthetic electron transport in photosystem I; F:oxidoreductase activity, acting on iron-sulfur proteins as donors; C:chloroplast thylakoid membrane
TRINITY_DN10088_c0_g1_i5	Pgr5-like a, a isoform 1	4.19719e-145	4	P:GO:0009773; F:GO:0016730; C:GO:0009535; C:GO:0016021	P:photosynthetic electron transport in photosystem I; F:oxidoreductase activity, acting on iron-sulfur proteins as donors; C:chloroplast thylakoid membrane; C:integral component of membrane			IPR039987 (PANTHER); PTHR31032:SF2 (PANTHER)	P:GO:0009773; F:GO:0016730; C:GO:0009535	P:photosynthetic electron transport in photosystem I; F:oxidoreductase activity, acting on iron-sulfur proteins as donors; C:chloroplast thylakoid membrane
TRINITY_DN10088_c0_g1_i6	PGR5-like A protein	0	4	P:GO:0009773; F:GO:0016730; C:GO:0009535; C:GO:0016021	P:photosynthetic electron transport in photosystem I; F:oxidoreductase activity, acting on iron-sulfur proteins as donors; C:chloroplast thylakoid membrane; C:integral component of membrane			IPR039987 (PANTHER); PTHR31032:SF2 (PANTHER)	P:GO:0009773; F:GO:0016730; C:GO:0009535	P:photosynthetic electron transport in photosystem I; F:oxidoreductase activity, acting on iron-sulfur proteins as donors; C:chloroplast thylakoid membrane
TRINITY_DN10088_c1_g1_i1	PGR5-like protein 1B, chloroplastic isoform X1	6.03394e-07	5	P:GO:0009773; F:GO:0016730; C:GO:0009535; C:GO:0016020; C:GO:0016021	P:photosynthetic electron transport in photosystem I; F:oxidoreductase activity, acting on iron-sulfur proteins as donors; C:chloroplast thylakoid membrane; C:membrane; C:integral component of membrane			no IPS match	no IPS match	no IPS match
TRINITY_DN10089_c0_g1_i1	homeobox-leucine zipper protein ATHB-20-like	0	12	P:GO:0009733; P:GO:0009739; P:GO:0009744; P:GO:0010311; P:GO:0045893; P:GO:0048826; P:GO:0080022; F:GO:0000976; F:GO:0003700; F:GO:0005515; F:GO:0043565; C:GO:0005634	P:response to auxin; P:response to gibberellin; P:response to sucrose; P:lateral root formation; P:positive regulation of transcription, DNA-templated; P:cotyledon morphogenesis; P:primary root development; F:transcription regulatory region sequence-specific DNA binding; F:DNA-binding transcription factor activity; F:protein binding; F:sequence-specific DNA binding; C:nucleus			IPR000047 (PRINTS); G3DSA:1.10.10.60 (GENE3D); IPR001356 (PFAM); IPR003106 (PFAM); mobidb-lite (MOBIDB_LITE); mobidb-lite (MOBIDB_LITE); PTHR24326:SF558 (PANTHER); PTHR24326 (PANTHER); IPR001356 (PROSITE_PROFILES); IPR001356 (CDD); IPR009057 (SUPERFAMILY)	P:GO:0006355; F:GO:0003677; F:GO:0043565	P:regulation of transcription, DNA-templated; F:DNA binding; F:sequence-specific DNA binding
TRINITY_DN10089_c0_g1_i3	homeobox-leucine zipper protein ATHB-20-like	0	12	P:GO:0009733; P:GO:0009739; P:GO:0009744; P:GO:0010311; P:GO:0045893; P:GO:0048826; P:GO:0080022; F:GO:0000976; F:GO:0003700; F:GO:0005515; F:GO:0043565; C:GO:0005634	P:response to auxin; P:response to gibberellin; P:response to sucrose; P:lateral root formation; P:positive regulation of transcription, DNA-templated; P:cotyledon morphogenesis; P:primary root development; F:transcription regulatory region sequence-specific DNA binding; F:DNA-binding transcription factor activity; F:protein binding; F:sequence-specific DNA binding; C:nucleus			IPR000047 (PRINTS); IPR003106 (PFAM); G3DSA:1.10.10.60 (GENE3D); IPR001356 (PFAM); mobidb-lite (MOBIDB_LITE); mobidb-lite (MOBIDB_LITE); PTHR24326 (PANTHER); PTHR24326:SF558 (PANTHER); IPR001356 (PROSITE_PROFILES); IPR001356 (CDD); IPR009057 (SUPERFAMILY)	P:GO:0006355; F:GO:0003677; F:GO:0043565	P:regulation of transcription, DNA-templated; F:DNA binding; F:sequence-specific DNA binding
TRINITY_DN10089_c0_g1_i4	homeobox-leucine zipper protein ATHB-20-like	0	12	P:GO:0009733; P:GO:0009739; P:GO:0009744; P:GO:0010311; P:GO:0045893; P:GO:0048826; P:GO:0080022; F:GO:0000976; F:GO:0003700; F:GO:0005515; F:GO:0043565; C:GO:0005634	P:response to auxin; P:response to gibberellin; P:response to sucrose; P:lateral root formation; P:positive regulation of transcription, DNA-templated; P:cotyledon morphogenesis; P:primary root development; F:transcription regulatory region sequence-specific DNA binding; F:DNA-binding transcription factor activity; F:protein binding; F:sequence-specific DNA binding; C:nucleus			IPR000047 (PRINTS); IPR003106 (PFAM); G3DSA:1.10.10.60 (GENE3D); IPR001356 (PFAM); mobidb-lite (MOBIDB_LITE); mobidb-lite (MOBIDB_LITE); mobidb-lite (MOBIDB_LITE); PTHR24326:SF558 (PANTHER); PTHR24326 (PANTHER); IPR001356 (PROSITE_PROFILES); IPR001356 (CDD); IPR009057 (SUPERFAMILY)	P:GO:0006355; F:GO:0003677; F:GO:0043565	P:regulation of transcription, DNA-templated; F:DNA binding; F:sequence-specific DNA binding
TRINITY_DN10089_c0_g1_i5	homeobox-leucine zipper protein ATHB-20-like	0	12	P:GO:0009733; P:GO:0009739; P:GO:0009744; P:GO:0010311; P:GO:0045893; P:GO:0048826; P:GO:0080022; F:GO:0000976; F:GO:0003700; F:GO:0005515; F:GO:0043565; C:GO:0005634	P:response to auxin; P:response to gibberellin; P:response to sucrose; P:lateral root formation; P:positive regulation of transcription, DNA-templated; P:cotyledon morphogenesis; P:primary root development; F:transcription regulatory region sequence-specific DNA binding; F:DNA-binding transcription factor activity; F:protein binding; F:sequence-specific DNA binding; C:nucleus			IPR000047 (PRINTS); IPR001356 (PFAM); G3DSA:1.10.10.60 (GENE3D); IPR003106 (PFAM); mobidb-lite (MOBIDB_LITE); mobidb-lite (MOBIDB_LITE); mobidb-lite (MOBIDB_LITE); PTHR24326:SF558 (PANTHER); PTHR24326 (PANTHER); IPR001356 (PROSITE_PROFILES); IPR001356 (CDD); IPR009057 (SUPERFAMILY)	P:GO:0006355; F:GO:0003677; F:GO:0043565	P:regulation of transcription, DNA-templated; F:DNA binding; F:sequence-specific DNA binding
TRINITY_DN10089_c0_g1_i6	homeobox-leucine zipper protein ATHB-20-like	0	12	P:GO:0009733; P:GO:0009739; P:GO:0009744; P:GO:0010311; P:GO:0045893; P:GO:0048826; P:GO:0080022; F:GO:0000976; F:GO:0003700; F:GO:0005515; F:GO:0043565; C:GO:0005634	P:response to auxin; P:response to gibberellin; P:response to sucrose; P:lateral root formation; P:positive regulation of transcription, DNA-templated; P:cotyledon morphogenesis; P:primary root development; F:transcription regulatory region sequence-specific DNA binding; F:DNA-binding transcription factor activity; F:protein binding; F:sequence-specific DNA binding; C:nucleus			IPR000047 (PRINTS); G3DSA:1.10.10.60 (GENE3D); IPR003106 (PFAM); IPR001356 (PFAM); mobidb-lite (MOBIDB_LITE); mobidb-lite (MOBIDB_LITE); mobidb-lite (MOBIDB_LITE); mobidb-lite (MOBIDB_LITE); PTHR24326:SF558 (PANTHER); PTHR24326 (PANTHER); IPR001356 (PROSITE_PROFILES); IPR001356 (CDD); IPR009057 (SUPERFAMILY)	P:GO:0006355; F:GO:0003677; F:GO:0043565	P:regulation of transcription, DNA-templated; F:DNA binding; F:sequence-specific DNA binding
TRINITY_DN10089_c0_g1_i9	homeobox-leucine zipper protein ATHB-20-like	0	12	P:GO:0009733; P:GO:0009739; P:GO:0009744; P:GO:0010311; P:GO:0045893; P:GO:0048826; P:GO:0080022; F:GO:0000976; F:GO:0003700; F:GO:0005515; F:GO:0043565; C:GO:0005634	P:response to auxin; P:response to gibberellin; P:response to sucrose; P:lateral root formation; P:positive regulation of transcription, DNA-templated; P:cotyledon morphogenesis; P:primary root development; F:transcription regulatory region sequence-specific DNA binding; F:DNA-binding transcription factor activity; F:protein binding; F:sequence-specific DNA binding; C:nucleus			IPR000047 (PRINTS); IPR003106 (PFAM); IPR001356 (PFAM); G3DSA:1.10.10.60 (GENE3D); mobidb-lite (MOBIDB_LITE); mobidb-lite (MOBIDB_LITE); mobidb-lite (MOBIDB_LITE); PTHR24326 (PANTHER); PTHR24326:SF558 (PANTHER); IPR001356 (PROSITE_PROFILES); IPR001356 (CDD); IPR009057 (SUPERFAMILY)	P:GO:0006355; F:GO:0003677; F:GO:0043565	P:regulation of transcription, DNA-templated; F:DNA binding; F:sequence-specific DNA binding
TRINITY_DN1009_c0_g1_i1	Integral membrane Yip1 family protein	8.42967e-73	6	P:GO:0015774; F:GO:0005515; C:GO:0005802; C:GO:0005829; C:GO:0005886; C:GO:0016021	P:polysaccharide transport; F:protein binding; C:trans-Golgi network; C:cytosol; C:plasma membrane; C:integral component of membrane			mobidb-lite (MOBIDB_LITE); mobidb-lite (MOBIDB_LITE); PTHR21236:SF17 (PANTHER); PTHR21236 (PANTHER)	no GO terms	no GO terms
TRINITY_DN1009_c0_g1_i2	Integral membrane Yip1 family protein	1.36507e-134	6	P:GO:0015774; F:GO:0005515; C:GO:0005802; C:GO:0005829; C:GO:0005886; C:GO:0016021	P:polysaccharide transport; F:protein binding; C:trans-Golgi network; C:cytosol; C:plasma membrane; C:integral component of membrane			IPR006977 (PFAM); mobidb-lite (MOBIDB_LITE); mobidb-lite (MOBIDB_LITE); mobidb-lite (MOBIDB_LITE); mobidb-lite (MOBIDB_LITE); PTHR21236:SF17 (PANTHER); PTHR21236 (PANTHER)	C:GO:0016020	C:membrane
TRINITY_DN1009_c0_g1_i3	Integral membrane Yip1 family protein	2.02943e-70	6	P:GO:0015774; F:GO:0005515; C:GO:0005802; C:GO:0005829; C:GO:0005886; C:GO:0016021	P:polysaccharide transport; F:protein binding; C:trans-Golgi network; C:cytosol; C:plasma membrane; C:integral component of membrane			mobidb-lite (MOBIDB_LITE); mobidb-lite (MOBIDB_LITE); PTHR21236 (PANTHER); PTHR21236:SF17 (PANTHER)	no GO terms	no GO terms
TRINITY_DN1009_c0_g1_i4	Integral membrane Yip1 family protein	7.62367e-133	6	P:GO:0015774; F:GO:0005515; C:GO:0005802; C:GO:0005829; C:GO:0005886; C:GO:0016021	P:polysaccharide transport; F:protein binding; C:trans-Golgi network; C:cytosol; C:plasma membrane; C:integral component of membrane			IPR006977 (PFAM); mobidb-lite (MOBIDB_LITE); mobidb-lite (MOBIDB_LITE); PTHR21236:SF17 (PANTHER); PTHR21236 (PANTHER)	C:GO:0016020	C:membrane
TRINITY_DN1009_c0_g1_i5	Integral membrane Yip1 family protein	2.49218e-68	6	P:GO:0015774; F:GO:0005515; C:GO:0005802; C:GO:0005829; C:GO:0005886; C:GO:0016021	P:polysaccharide transport; F:protein binding; C:trans-Golgi network; C:cytosol; C:plasma membrane; C:integral component of membrane			mobidb-lite (MOBIDB_LITE); mobidb-lite (MOBIDB_LITE); PTHR21236 (PANTHER); PTHR21236:SF17 (PANTHER)	no GO terms	no GO terms
TRINITY_DN1009_c0_g1_i6	Integral membrane Yip1 family protein	2.22098e-68	6	P:GO:0015774; F:GO:0005515; C:GO:0005802; C:GO:0005829; C:GO:0005886; C:GO:0016021	P:polysaccharide transport; F:protein binding; C:trans-Golgi network; C:cytosol; C:plasma membrane; C:integral component of membrane			mobidb-lite (MOBIDB_LITE); mobidb-lite (MOBIDB_LITE); PTHR21236 (PANTHER); PTHR21236:SF17 (PANTHER)	no GO terms	no GO terms
TRINITY_DN1009_c0_g1_i7	Integral membrane Yip1 family protein	4.82167e-101	6	P:GO:0015774; F:GO:0005515; C:GO:0005802; C:GO:0005829; C:GO:0005886; C:GO:0016021	P:polysaccharide transport; F:protein binding; C:trans-Golgi network; C:cytosol; C:plasma membrane; C:integral component of membrane			IPR006977 (PFAM); mobidb-lite (MOBIDB_LITE); mobidb-lite (MOBIDB_LITE); PTHR21236 (PANTHER); PTHR21236:SF17 (PANTHER)	C:GO:0016020	C:membrane
TRINITY_DN1009_c0_g1_i8	Integral membrane Yip1 family protein	9.32556e-73	6	P:GO:0015774; F:GO:0005515; C:GO:0005802; C:GO:0005829; C:GO:0005886; C:GO:0016021	P:polysaccharide transport; F:protein binding; C:trans-Golgi network; C:cytosol; C:plasma membrane; C:integral component of membrane			mobidb-lite (MOBIDB_LITE); mobidb-lite (MOBIDB_LITE); PTHR21236:SF17 (PANTHER); PTHR21236 (PANTHER)	no GO terms	no GO terms
TRINITY_DN1009_c1_g1_i1	---NA---							no IPS match	no IPS match	no IPS match
TRINITY_DN10090_c0_g1_i1	BTB/POZ domain-containing protein FBL11 isoform X2	0	6	P:GO:0016567; P:GO:0031146; F:GO:0004842; F:GO:0005515; F:GO:0016874; C:GO:0019005	P:protein ubiquitination; P:SCF-dependent proteasomal ubiquitin-dependent protein catabolic process; F:ubiquitin-protein transferase activity; F:protein binding; F:ligase activity; C:SCF ubiquitin ligase complex			G3DSA:1.25.40.420 (GENE3D); IPR000210 (PFAM); IPR011705 (PFAM); IPR032675 (G3DSA:3.80.10.GENE3D); G3DSA:3.30.710.10 (GENE3D); PTHR13318 (PANTHER); PTHR13318:SF71 (PANTHER); IPR000210 (PROSITE_PROFILES); cd18446 (CDD); cd18186 (CDD); SSF52047 (SUPERFAMILY); IPR011333 (SUPERFAMILY); SSF52047 (SUPERFAMILY)	F:GO:0005515	F:protein binding
TRINITY_DN10090_c0_g1_i2	BTB/POZ domain-containing protein FBL11 isoform X7	0	4	P:GO:0031146; F:GO:0004842; F:GO:0016874; C:GO:0019005	P:SCF-dependent proteasomal ubiquitin-dependent protein catabolic process; F:ubiquitin-protein transferase activity; F:ligase activity; C:SCF ubiquitin ligase complex			IPR011705 (PFAM); G3DSA:1.25.40.420 (GENE3D); IPR032675 (G3DSA:3.80.10.GENE3D); PTHR13318 (PANTHER); PTHR13318:SF71 (PANTHER); cd18446 (CDD); SSF52047 (SUPERFAMILY)	no GO terms	no GO terms
TRINITY_DN10090_c0_g1_i3	ubiquitin-protein ligase	0	5	P:GO:0016567; P:GO:0031146; F:GO:0004842; F:GO:0016874; C:GO:0019005	P:protein ubiquitination; P:SCF-dependent proteasomal ubiquitin-dependent protein catabolic process; F:ubiquitin-protein transferase activity; F:ligase activity; C:SCF ubiquitin ligase complex			IPR032675 (G3DSA:3.80.10.GENE3D); IPR011705 (PFAM); PTHR13318:SF71 (PANTHER); PTHR13318 (PANTHER); SSF52047 (SUPERFAMILY); SSF52047 (SUPERFAMILY)	no GO terms	no GO terms
TRINITY_DN10090_c0_g1_i4	ubiquitin-protein ligase	0	5	P:GO:0016567; P:GO:0031146; F:GO:0004842; F:GO:0016874; C:GO:0019005	P:protein ubiquitination; P:SCF-dependent proteasomal ubiquitin-dependent protein catabolic process; F:ubiquitin-protein transferase activity; F:ligase activity; C:SCF ubiquitin ligase complex			G3DSA:1.25.40.420 (GENE3D); IPR011705 (PFAM); IPR032675 (G3DSA:3.80.10.GENE3D); PTHR13318:SF71 (PANTHER); PTHR13318 (PANTHER); cd18446 (CDD); SSF52047 (SUPERFAMILY); SSF52047 (SUPERFAMILY)	no GO terms	no GO terms
TRINITY_DN10090_c0_g1_i5	BTB/POZ domain-containing protein FBL11 isoform X13	0	5	P:GO:0016567; P:GO:0031146; F:GO:0004842; F:GO:0016874; C:GO:0019005	P:protein ubiquitination; P:SCF-dependent proteasomal ubiquitin-dependent protein catabolic process; F:ubiquitin-protein transferase activity; F:ligase activity; C:SCF ubiquitin ligase complex			IPR032675 (G3DSA:3.80.10.GENE3D); PTHR13318:SF71 (PANTHER); PTHR13318 (PANTHER); SSF52047 (SUPERFAMILY)	no GO terms	no GO terms
TRINITY_DN10090_c0_g1_i6	BTB/POZ domain-containing protein FBL11 isoform X7	0	5	P:GO:0016567; P:GO:0031146; F:GO:0004842; F:GO:0016874; C:GO:0019005	P:protein ubiquitination; P:SCF-dependent proteasomal ubiquitin-dependent protein catabolic process; F:ubiquitin-protein transferase activity; F:ligase activity; C:SCF ubiquitin ligase complex			G3DSA:1.25.40.420 (GENE3D); IPR011705 (PFAM); IPR032675 (G3DSA:3.80.10.GENE3D); PTHR13318 (PANTHER); PTHR13318:SF71 (PANTHER); cd18446 (CDD); SSF52047 (SUPERFAMILY)	no GO terms	no GO terms
TRINITY_DN10090_c0_g1_i7	BTB/POZ domain-containing protein FBL11 isoform X2	0	6	P:GO:0016567; P:GO:0031146; F:GO:0004842; F:GO:0005515; F:GO:0016874; C:GO:0019005	P:protein ubiquitination; P:SCF-dependent proteasomal ubiquitin-dependent protein catabolic process; F:ubiquitin-protein transferase activity; F:protein binding; F:ligase activity; C:SCF ubiquitin ligase complex			IPR032675 (G3DSA:3.80.10.GENE3D); IPR000210 (PFAM); G3DSA:3.30.710.10 (GENE3D); IPR011705 (PFAM); G3DSA:1.25.40.420 (GENE3D); PTHR13318:SF71 (PANTHER); PTHR13318 (PANTHER); IPR000210 (PROSITE_PROFILES); cd18446 (CDD); cd18186 (CDD); SSF52047 (SUPERFAMILY); IPR011333 (SUPERFAMILY); SSF52047 (SUPERFAMILY)	F:GO:0005515	F:protein binding
TRINITY_DN10090_c0_g2_i1	---NA---							no IPS match	no IPS match	no IPS match
TRINITY_DN10090_c0_g3_i1	BTB/POZ domain-containing protein FBL11 isoform X13	2.00486e-07	6	P:GO:0006511; P:GO:0016567; P:GO:0031146; F:GO:0004842; F:GO:0016874; C:GO:0019005	P:ubiquitin-dependent protein catabolic process; P:protein ubiquitination; P:SCF-dependent proteasomal ubiquitin-dependent protein catabolic process; F:ubiquitin-protein transferase activity; F:ligase activity; C:SCF ubiquitin ligase complex			no IPS match	no IPS match	no IPS match
TRINITY_DN10091_c0_g1_i1	Bifunctional inhibitor/lipid-transfer protein/seed storage 2S albumin superfamily protein	9.90516e-99	7	P:GO:0006869; P:GO:0042335; P:GO:0050832; F:GO:0008289; C:GO:0005783; C:GO:0009505; C:GO:0046658	P:lipid transport; P:cuticle development; P:defense response to fungus; F:lipid binding; C:endoplasmic reticulum; C:plant-type cell wall; C:anchored component of plasma membrane			G3DSA:1.10.110.10 (GENE3D); IPR016140 (PFAM); PTHR33044 (PANTHER); PTHR33044:SF118 (PANTHER); cd00010 (CDD); IPR036312 (SUPERFAMILY)	no GO terms	no GO terms
TRINITY_DN10091_c0_g1_i2	Bifunctional inhibitor/lipid-transfer protein/seed storage 2S albumin superfamily protein	8.41656e-91	7	P:GO:0006869; P:GO:0042335; P:GO:0050832; F:GO:0008289; C:GO:0005783; C:GO:0009505; C:GO:0046658	P:lipid transport; P:cuticle development; P:defense response to fungus; F:lipid binding; C:endoplasmic reticulum; C:plant-type cell wall; C:anchored component of plasma membrane			IPR016140 (PFAM); G3DSA:1.10.110.10 (GENE3D); mobidb-lite (MOBIDB_LITE); PTHR33044:SF118 (PANTHER); PTHR33044 (PANTHER); cd00010 (CDD); IPR036312 (SUPERFAMILY)	no GO terms	no GO terms
TRINITY_DN10092_c0_g1_i1	Proteasome component (PCI) domain protein	0	7	P:GO:0001732; F:GO:0003743; C:GO:0000502; C:GO:0005829; C:GO:0016282; C:GO:0033290; C:GO:0071541	P:formation of cytoplasmic translation initiation complex; F:translation initiation factor activity; C:proteasome complex; C:cytosol; C:eukaryotic 43S preinitiation complex; C:eukaryotic 48S preinitiation complex; C:eukaryotic translation initiation factor 3 complex, eIF3m			IPR000717 (PFAM); G3DSA:1.25.40.570 (GENE3D); IPR040750 (PFAM); PTHR15350:SF12 (PANTHER); PTHR15350:SF12 (PANTHER); PTHR15350 (PANTHER); PTHR15350 (PANTHER); IPR000717 (PROSITE_PROFILES); IPR027528 (HAMAP)	F:GO:0003743; C:GO:0005737; C:GO:0005852	F:translation initiation factor activity; C:cytoplasm; C:eukaryotic translation initiation factor 3 complex
TRINITY_DN10092_c0_g1_i2	Proteasome component (PCI) domain protein	1.38062e-40	7	P:GO:0001732; F:GO:0003743; C:GO:0000502; C:GO:0005829; C:GO:0016282; C:GO:0033290; C:GO:0071541	P:formation of cytoplasmic translation initiation complex; F:translation initiation factor activity; C:proteasome complex; C:cytosol; C:eukaryotic 43S preinitiation complex; C:eukaryotic 48S preinitiation complex; C:eukaryotic translation initiation factor 3 complex, eIF3m			PTHR15350:SF12 (PANTHER); PTHR15350 (PANTHER)	no GO terms	no GO terms
TRINITY_DN10092_c0_g1_i3	Proteasome component (PCI) domain protein	0	7	P:GO:0001732; F:GO:0003743; C:GO:0000502; C:GO:0005829; C:GO:0016282; C:GO:0033290; C:GO:0071541	P:formation of cytoplasmic translation initiation complex; F:translation initiation factor activity; C:proteasome complex; C:cytosol; C:eukaryotic 43S preinitiation complex; C:eukaryotic 48S preinitiation complex; C:eukaryotic translation initiation factor 3 complex, eIF3m			IPR000717 (PFAM); G3DSA:1.25.40.570 (GENE3D); IPR040750 (PFAM); PTHR15350 (PANTHER); PTHR15350:SF12 (PANTHER); PTHR15350:SF12 (PANTHER); PTHR15350 (PANTHER); IPR000717 (PROSITE_PROFILES); IPR027528 (HAMAP)	F:GO:0003743; C:GO:0005737; C:GO:0005852	F:translation initiation factor activity; C:cytoplasm; C:eukaryotic translation initiation factor 3 complex
TRINITY_DN10092_c0_g1_i4	Proteasome component (PCI) domain protein	5.61752e-180	7	P:GO:0001732; F:GO:0003743; C:GO:0000502; C:GO:0005829; C:GO:0016282; C:GO:0033290; C:GO:0071541	P:formation of cytoplasmic translation initiation complex; F:translation initiation factor activity; C:proteasome complex; C:cytosol; C:eukaryotic 43S preinitiation complex; C:eukaryotic 48S preinitiation complex; C:eukaryotic translation initiation factor 3 complex, eIF3m			G3DSA:1.25.40.570 (GENE3D); PTHR15350 (PANTHER); PTHR15350:SF12 (PANTHER)	no GO terms	no GO terms
TRINITY_DN10092_c0_g1_i5	Proteasome component (PCI) domain protein	0	7	P:GO:0001732; F:GO:0003743; C:GO:0000502; C:GO:0005829; C:GO:0016282; C:GO:0033290; C:GO:0071541	P:formation of cytoplasmic translation initiation complex; F:translation initiation factor activity; C:proteasome complex; C:cytosol; C:eukaryotic 43S preinitiation complex; C:eukaryotic 48S preinitiation complex; C:eukaryotic translation initiation factor 3 complex, eIF3m			IPR000717 (PFAM); G3DSA:1.25.40.570 (GENE3D); IPR040750 (PFAM); PTHR15350 (PANTHER); PTHR15350:SF12 (PANTHER); PTHR15350:SF12 (PANTHER); PTHR15350 (PANTHER); IPR000717 (PROSITE_PROFILES); IPR036390 (SUPERFAMILY)	no GO terms	no GO terms
TRINITY_DN10092_c0_g1_i6	Proteasome component (PCI) domain protein	0	7	P:GO:0001732; F:GO:0003743; C:GO:0000502; C:GO:0005829; C:GO:0016282; C:GO:0033290; C:GO:0071541	P:formation of cytoplasmic translation initiation complex; F:translation initiation factor activity; C:proteasome complex; C:cytosol; C:eukaryotic 43S preinitiation complex; C:eukaryotic 48S preinitiation complex; C:eukaryotic translation initiation factor 3 complex, eIF3m			IPR000717 (PFAM); IPR040750 (PFAM); G3DSA:1.25.40.570 (GENE3D); PTHR15350 (PANTHER); PTHR15350:SF12 (PANTHER); IPR000717 (PROSITE_PROFILES); IPR027528 (HAMAP)	F:GO:0003743; C:GO:0005737; C:GO:0005852	F:translation initiation factor activity; C:cytoplasm; C:eukaryotic translation initiation factor 3 complex
TRINITY_DN10092_c0_g2_i1	Proteasome component (PCI) domain protein	6.37637e-20	4	P:GO:0002183; C:GO:0005829; C:GO:0005852; C:GO:0070993	P:cytoplasmic translational initiation; C:cytosol; C:eukaryotic translation initiation factor 3 complex; C:translation preinitiation complex			PTHR15350 (PANTHER); PTHR15350:SF12 (PANTHER)	no GO terms	no GO terms
TRINITY_DN10093_c0_g1_i2	---NA---							no IPS match	no IPS match	no IPS match
TRINITY_DN10094_c0_g1_i1	protein-tyrosine-phosphatase MKP1-like	1.22934e-76	6	P:GO:0016310; P:GO:0035335; F:GO:0004725; F:GO:0008138; F:GO:0016301; F:GO:0051015	P:phosphorylation; P:peptidyl-tyrosine dephosphorylation; F:protein tyrosine phosphatase activity; F:protein tyrosine/serine/threonine phosphatase activity; F:kinase activity; F:actin filament binding	EC:3.1.3.16; EC:3.1.3.48	Protein-serine/threonine phosphatase; Protein-tyrosine-phosphatase	PTHR46381 (PANTHER); PTHR46381:SF2 (PANTHER)	no GO terms	no GO terms
TRINITY_DN10094_c0_g1_i2	protein-tyrosine-phosphatase MKP1-like	4.43489e-90	6	P:GO:0016310; P:GO:0035335; F:GO:0004725; F:GO:0008138; F:GO:0016301; F:GO:0051015	P:phosphorylation; P:peptidyl-tyrosine dephosphorylation; F:protein tyrosine phosphatase activity; F:protein tyrosine/serine/threonine phosphatase activity; F:kinase activity; F:actin filament binding	EC:3.1.3.16; EC:3.1.3.48	Protein-serine/threonine phosphatase; Protein-tyrosine-phosphatase	IPR029006 (G3DSA:3.40.20.GENE3D); PTHR46381:SF2 (PANTHER); PTHR46381 (PANTHER); SSF55753 (SUPERFAMILY)	no GO terms	no GO terms
TRINITY_DN10095_c0_g1_i1	TOM1-like protein 1 isoform X3	1.01615e-16						no IPS match	no IPS match	no IPS match
TRINITY_DN10096_c0_g1_i1	SLAC1 homologue 2	0	20	P:GO:0006821; P:GO:0006873; P:GO:0009270; P:GO:0009414; P:GO:0009416; P:GO:0009651; P:GO:0009737; P:GO:0010037; P:GO:0010193; P:GO:0015711; P:GO:0050891; P:GO:0090333; P:GO:1901529; P:GO:1902456; F:GO:0008308; F:GO:0019901; F:GO:0019903; C:GO:0005623; C:GO:0005886; C:GO:0016021	P:chloride transport; P:cellular ion homeostasis; P:response to humidity; P:response to water deprivation; P:response to light stimulus; P:response to salt stress; P:response to abscisic acid; P:response to carbon dioxide; P:response to ozone; P:organic anion transport; P:multicellular organismal water homeostasis; P:regulation of stomatal closure; P:positive regulation of anion channel activity;…			IPR038665 (G3DSA:1.50.10.GENE3D); IPR004695 (PFAM); mobidb-lite (MOBIDB_LITE); IPR030183 (PTHR31269:PANTHER); PTHR31269 (PANTHER); cd09323 (CDD)	P:GO:0006873; P:GO:0055085; F:GO:0008308; C:GO:0016021	P:cellular ion homeostasis; P:transmembrane transport; F:voltage-gated anion channel activity; C:integral component of membrane
TRINITY_DN10096_c0_g1_i2	SLAC1 homologue 2	0	20	P:GO:0006821; P:GO:0006873; P:GO:0009270; P:GO:0009414; P:GO:0009416; P:GO:0009651; P:GO:0009737; P:GO:0010037; P:GO:0010193; P:GO:0015711; P:GO:0050891; P:GO:0090333; P:GO:1901529; P:GO:1902456; F:GO:0008308; F:GO:0019901; F:GO:0019903; C:GO:0005623; C:GO:0005886; C:GO:0016021	P:chloride transport; P:cellular ion homeostasis; P:response to humidity; P:response to water deprivation; P:response to light stimulus; P:response to salt stress; P:response to abscisic acid; P:response to carbon dioxide; P:response to ozone; P:organic anion transport; P:multicellular organismal water homeostasis; P:regulation of stomatal closure; P:positive regulation of anion channel activity;…			IPR038665 (G3DSA:1.50.10.GENE3D); IPR004695 (PFAM); mobidb-lite (MOBIDB_LITE); PTHR31269 (PANTHER); IPR030183 (PTHR31269:PANTHER); cd09323 (CDD)	P:GO:0006873; P:GO:0055085; F:GO:0008308; C:GO:0016021	P:cellular ion homeostasis; P:transmembrane transport; F:voltage-gated anion channel activity; C:integral component of membrane
TRINITY_DN10096_c0_g1_i3	SLAC1 homologue 2	7.48102e-162	20	P:GO:0006821; P:GO:0006873; P:GO:0009270; P:GO:0009414; P:GO:0009416; P:GO:0009651; P:GO:0009737; P:GO:0010037; P:GO:0010193; P:GO:0015711; P:GO:0050891; P:GO:0090333; P:GO:1901529; P:GO:1902456; F:GO:0008308; F:GO:0019901; F:GO:0019903; C:GO:0005623; C:GO:0005886; C:GO:0016021	P:chloride transport; P:cellular ion homeostasis; P:response to humidity; P:response to water deprivation; P:response to light stimulus; P:response to salt stress; P:response to abscisic acid; P:response to carbon dioxide; P:response to ozone; P:organic anion transport; P:multicellular organismal water homeostasis; P:regulation of stomatal closure; P:positive regulation of anion channel activity;…			IPR004695 (PFAM); IPR038665 (G3DSA:1.50.10.GENE3D); IPR030183 (PTHR31269:PANTHER); PTHR31269 (PANTHER); cd09323 (CDD)	P:GO:0006873; P:GO:0055085; F:GO:0008308; C:GO:0016021	P:cellular ion homeostasis; P:transmembrane transport; F:voltage-gated anion channel activity; C:integral component of membrane
TRINITY_DN10096_c0_g1_i5	SLAC1 homologue 2	0	20	P:GO:0006821; P:GO:0006873; P:GO:0009270; P:GO:0009414; P:GO:0009416; P:GO:0009651; P:GO:0009737; P:GO:0010037; P:GO:0010193; P:GO:0015711; P:GO:0050891; P:GO:0090333; P:GO:1901529; P:GO:1902456; F:GO:0008308; F:GO:0019901; F:GO:0019903; C:GO:0005623; C:GO:0005886; C:GO:0016021	P:chloride transport; P:cellular ion homeostasis; P:response to humidity; P:response to water deprivation; P:response to light stimulus; P:response to salt stress; P:response to abscisic acid; P:response to carbon dioxide; P:response to ozone; P:organic anion transport; P:multicellular organismal water homeostasis; P:regulation of stomatal closure; P:positive regulation of anion channel activity;…			IPR004695 (PFAM); IPR038665 (G3DSA:1.50.10.GENE3D); mobidb-lite (MOBIDB_LITE); mobidb-lite (MOBIDB_LITE); IPR030183 (PTHR31269:PANTHER); PTHR31269 (PANTHER); cd09323 (CDD)	P:GO:0006873; P:GO:0055085; F:GO:0008308; C:GO:0016021	P:cellular ion homeostasis; P:transmembrane transport; F:voltage-gated anion channel activity; C:integral component of membrane
TRINITY_DN10096_c0_g1_i6	SLAC1 homologue 2	0	20	P:GO:0006821; P:GO:0006873; P:GO:0009270; P:GO:0009414; P:GO:0009416; P:GO:0009651; P:GO:0009737; P:GO:0010037; P:GO:0010193; P:GO:0015711; P:GO:0050891; P:GO:0090333; P:GO:1901529; P:GO:1902456; F:GO:0008308; F:GO:0019901; F:GO:0019903; C:GO:0005623; C:GO:0005886; C:GO:0016021	P:chloride transport; P:cellular ion homeostasis; P:response to humidity; P:response to water deprivation; P:response to light stimulus; P:response to salt stress; P:response to abscisic acid; P:response to carbon dioxide; P:response to ozone; P:organic anion transport; P:multicellular organismal water homeostasis; P:regulation of stomatal closure; P:positive regulation of anion channel activity;…			IPR038665 (G3DSA:1.50.10.GENE3D); IPR004695 (PFAM); mobidb-lite (MOBIDB_LITE); PTHR31269 (PANTHER); IPR030183 (PTHR31269:PANTHER); cd09323 (CDD)	P:GO:0006873; P:GO:0055085; F:GO:0008308; C:GO:0016021	P:cellular ion homeostasis; P:transmembrane transport; F:voltage-gated anion channel activity; C:integral component of membrane
TRINITY_DN10096_c0_g1_i7	SLAC1 homologue 2	0	20	P:GO:0006821; P:GO:0006873; P:GO:0009270; P:GO:0009414; P:GO:0009416; P:GO:0009651; P:GO:0009737; P:GO:0010037; P:GO:0010193; P:GO:0015711; P:GO:0050891; P:GO:0090333; P:GO:1901529; P:GO:1902456; F:GO:0008308; F:GO:0019901; F:GO:0019903; C:GO:0005623; C:GO:0005886; C:GO:0016021	P:chloride transport; P:cellular ion homeostasis; P:response to humidity; P:response to water deprivation; P:response to light stimulus; P:response to salt stress; P:response to abscisic acid; P:response to carbon dioxide; P:response to ozone; P:organic anion transport; P:multicellular organismal water homeostasis; P:regulation of stomatal closure; P:positive regulation of anion channel activity;…			IPR038665 (G3DSA:1.50.10.GENE3D); IPR004695 (PFAM); mobidb-lite (MOBIDB_LITE); PTHR31269 (PANTHER); IPR030183 (PTHR31269:PANTHER); cd09323 (CDD)	P:GO:0006873; P:GO:0055085; F:GO:0008308; C:GO:0016021	P:cellular ion homeostasis; P:transmembrane transport; F:voltage-gated anion channel activity; C:integral component of membrane
TRINITY_DN10097_c0_g1_i1	---NA---							no IPS match	no IPS match	no IPS match
TRINITY_DN10097_c0_g1_i2	---NA---							no IPS match	no IPS match	no IPS match
TRINITY_DN10097_c0_g1_i3	---NA---							no IPS match	no IPS match	no IPS match
TRINITY_DN10097_c0_g1_i4	---NA---							no IPS match	no IPS match	no IPS match
TRINITY_DN10097_c0_g1_i5	Serine/threonine protein kinase, putative isoform 1	2.88251e-08	1	F:GO:0016301	F:kinase activity			PS51257 (PROSITE_PROFILES)	no GO terms	no GO terms
TRINITY_DN10097_c1_g1_i1	UPF0505 protein C16orf62 homolog isoform X1	0	4	P:GO:0015031; P:GO:0042147; C:GO:0005829; C:GO:0030906	P:protein transport; P:retrograde transport, endosome to Golgi; C:cytosol; C:retromer, cargo-selective complex			IPR005378 (PFAM); mobidb-lite (MOBIDB_LITE); mobidb-lite (MOBIDB_LITE); IPR029705 (PANTHER)	P:GO:0015031; P:GO:0042147; C:GO:0030906	P:protein transport; P:retrograde transport, endosome to Golgi; C:retromer, cargo-selective complex
TRINITY_DN10097_c1_g1_i10	UPF0505 protein C16orf62 homolog isoform X2	0	4	P:GO:0015031; P:GO:0042147; C:GO:0005829; C:GO:0030906	P:protein transport; P:retrograde transport, endosome to Golgi; C:cytosol; C:retromer, cargo-selective complex			IPR005378 (PFAM); IPR029705 (PANTHER)	P:GO:0015031; P:GO:0042147; C:GO:0030906	P:protein transport; P:retrograde transport, endosome to Golgi; C:retromer, cargo-selective complex
TRINITY_DN10097_c1_g1_i11	UPF0505 protein C16orf62 homolog isoform X1	0	4	P:GO:0015031; P:GO:0042147; C:GO:0005829; C:GO:0030906	P:protein transport; P:retrograde transport, endosome to Golgi; C:cytosol; C:retromer, cargo-selective complex			mobidb-lite (MOBIDB_LITE); mobidb-lite (MOBIDB_LITE); IPR029705 (PANTHER)	no GO terms	no GO terms
TRINITY_DN10097_c1_g1_i12	UPF0505 protein C16orf62 homolog isoform X2	0	4	P:GO:0015031; P:GO:0042147; C:GO:0005829; C:GO:0030906	P:protein transport; P:retrograde transport, endosome to Golgi; C:cytosol; C:retromer, cargo-selective complex			IPR005378 (PFAM); mobidb-lite (MOBIDB_LITE); mobidb-lite (MOBIDB_LITE); IPR029705 (PANTHER)	P:GO:0015031; P:GO:0042147; C:GO:0030906	P:protein transport; P:retrograde transport, endosome to Golgi; C:retromer, cargo-selective complex
TRINITY_DN10097_c1_g1_i13	UPF0505 protein C16orf62 homolog isoform X1	0	4	P:GO:0015031; P:GO:0042147; C:GO:0005829; C:GO:0030906	P:protein transport; P:retrograde transport, endosome to Golgi; C:cytosol; C:retromer, cargo-selective complex			mobidb-lite (MOBIDB_LITE); mobidb-lite (MOBIDB_LITE); IPR029705 (PANTHER)	no GO terms	no GO terms
TRINITY_DN10097_c1_g1_i14	UPF0505 protein C16orf62 homolog isoform X1	0	4	P:GO:0015031; P:GO:0042147; C:GO:0005829; C:GO:0030906	P:protein transport; P:retrograde transport, endosome to Golgi; C:cytosol; C:retromer, cargo-selective complex			IPR005378 (PFAM); mobidb-lite (MOBIDB_LITE); mobidb-lite (MOBIDB_LITE); IPR029705 (PANTHER)	P:GO:0015031; P:GO:0042147; C:GO:0030906	P:protein transport; P:retrograde transport, endosome to Golgi; C:retromer, cargo-selective complex
TRINITY_DN10097_c1_g1_i15	UPF0505 protein C16orf62 homolog isoform X1	0	4	P:GO:0015031; P:GO:0042147; C:GO:0005829; C:GO:0030906	P:protein transport; P:retrograde transport, endosome to Golgi; C:cytosol; C:retromer, cargo-selective complex			IPR005378 (PFAM); IPR029705 (PANTHER)	P:GO:0015031; P:GO:0042147; C:GO:0030906	P:protein transport; P:retrograde transport, endosome to Golgi; C:retromer, cargo-selective complex
TRINITY_DN10097_c1_g1_i16	UPF0505 protein C16orf62 homolog isoform X2	4.57902e-99	2	P:GO:0006810; C:GO:0016020	P:transport; C:membrane			IPR029705 (PANTHER)	no GO terms	no GO terms
TRINITY_DN10097_c1_g1_i2	UPF0505 protein C16orf62 homolog isoform X1	0	4	P:GO:0015031; P:GO:0042147; C:GO:0005829; C:GO:0030906	P:protein transport; P:retrograde transport, endosome to Golgi; C:cytosol; C:retromer, cargo-selective complex			mobidb-lite (MOBIDB_LITE); mobidb-lite (MOBIDB_LITE); IPR029705 (PANTHER)	no GO terms	no GO terms
TRINITY_DN10097_c1_g1_i4	UPF0505 protein C16orf62 homolog isoform X1	1.07847e-89	4	P:GO:0015031; P:GO:0042147; C:GO:0005829; C:GO:0030906	P:protein transport; P:retrograde transport, endosome to Golgi; C:cytosol; C:retromer, cargo-selective complex			IPR029705 (PANTHER)	no GO terms	no GO terms
TRINITY_DN10097_c1_g1_i5	UPF0505 protein C16orf62 homolog isoform X2	0	4	P:GO:0015031; P:GO:0042147; C:GO:0005829; C:GO:0030906	P:protein transport; P:retrograde transport, endosome to Golgi; C:cytosol; C:retromer, cargo-selective complex			IPR005378 (PFAM); mobidb-lite (MOBIDB_LITE); mobidb-lite (MOBIDB_LITE); IPR029705 (PANTHER)	P:GO:0015031; P:GO:0042147; C:GO:0030906	P:protein transport; P:retrograde transport, endosome to Golgi; C:retromer, cargo-selective complex
TRINITY_DN10097_c1_g1_i6	UPF0505 protein C16orf62 homolog isoform X1	0	4	P:GO:0015031; P:GO:0042147; C:GO:0005829; C:GO:0030906	P:protein transport; P:retrograde transport, endosome to Golgi; C:cytosol; C:retromer, cargo-selective complex			IPR029705 (PANTHER)	no GO terms	no GO terms
TRINITY_DN10097_c1_g1_i8	UPF0505 protein C16orf62 homolog isoform X1	0	4	P:GO:0015031; P:GO:0042147; C:GO:0005829; C:GO:0030906	P:protein transport; P:retrograde transport, endosome to Golgi; C:cytosol; C:retromer, cargo-selective complex			IPR005378 (PFAM); IPR029705 (PANTHER)	P:GO:0015031; P:GO:0042147; C:GO:0030906	P:protein transport; P:retrograde transport, endosome to Golgi; C:retromer, cargo-selective complex
TRINITY_DN10097_c1_g2_i1	---NA---							no IPS match	no IPS match	no IPS match
TRINITY_DN10097_c2_g1_i1	Small nuclear ribonucleoprotein family protein	4.74788e-05	14	P:GO:0000290; P:GO:0000956; P:GO:0006397; P:GO:0009414; P:GO:0009631; P:GO:0016070; P:GO:0042538; F:GO:0000339; F:GO:0003723; F:GO:0005515; C:GO:0000932; C:GO:0005737; C:GO:0005829; C:GO:1990726	P:deadenylation-dependent decapping of nuclear-transcribed mRNA; P:nuclear-transcribed mRNA catabolic process; P:mRNA processing; P:response to water deprivation; P:cold acclimation; P:RNA metabolic process; P:hyperosmotic salinity response; F:RNA cap binding; F:RNA binding; F:protein binding; C:P-body; C:cytoplasm; C:cytosol; C:Lsm1-7-Pat1 complex			G3DSA:2.30.30.100 (GENE3D)	no GO terms	no GO terms
TRINITY_DN10097_c2_g1_i2	---NA---							no IPS match	no IPS match	no IPS match
TRINITY_DN10097_c2_g1_i3	Small nuclear ribonucleoprotein family protein	6.37432e-05	14	P:GO:0000290; P:GO:0000956; P:GO:0006397; P:GO:0009414; P:GO:0009631; P:GO:0016070; P:GO:0042538; F:GO:0000339; F:GO:0003723; F:GO:0005515; C:GO:0000932; C:GO:0005737; C:GO:0005829; C:GO:1990726	P:deadenylation-dependent decapping of nuclear-transcribed mRNA; P:nuclear-transcribed mRNA catabolic process; P:mRNA processing; P:response to water deprivation; P:cold acclimation; P:RNA metabolic process; P:hyperosmotic salinity response; F:RNA cap binding; F:RNA binding; F:protein binding; C:P-body; C:cytoplasm; C:cytosol; C:Lsm1-7-Pat1 complex			G3DSA:2.30.30.100 (GENE3D)	no GO terms	no GO terms
TRINITY_DN10097_c3_g1_i1	---NA---							no IPS match	no IPS match	no IPS match
TRINITY_DN10098_c0_g1_i1	receptor-like protein kinase FERONIA	0	17	P:GO:0009742; P:GO:0009788; P:GO:0009791; P:GO:0009873; P:GO:0010118; P:GO:0010483; P:GO:0030308; P:GO:0046777; P:GO:0048364; P:GO:0050832; F:GO:0004674; F:GO:0005515; F:GO:0005524; C:GO:0005886; C:GO:0009506; C:GO:0016021; C:GO:0043680	P:brassinosteroid mediated signaling pathway; P:negative regulation of abscisic acid-activated signaling pathway; P:post-embryonic development; P:ethylene-activated signaling pathway; P:stomatal movement; P:pollen tube reception; P:negative regulation of cell growth; P:protein autophosphorylation; P:root development; P:defense response to fungus; F:protein serine/threonine kinase activity; F:prot…			G3DSA:3.30.200.20 (GENE3D); IPR024788 (PFAM); G3DSA:2.60.120.430 (GENE3D); mobidb-lite (MOBIDB_LITE); PTHR27003:SF295 (PANTHER); PTHR27003 (PANTHER); IPR011009 (SUPERFAMILY)	no GO terms	no GO terms
TRINITY_DN10098_c0_g1_i2	receptor-like protein kinase FERONIA	0	18	P:GO:0009742; P:GO:0009788; P:GO:0009791; P:GO:0009873; P:GO:0010118; P:GO:0010483; P:GO:0030308; P:GO:0046777; P:GO:0048364; P:GO:0050832; F:GO:0004674; F:GO:0005515; F:GO:0005524; C:GO:0009506; C:GO:0016021; C:GO:0016324; C:GO:0043680; C:GO:0090404	P:brassinosteroid mediated signaling pathway; P:negative regulation of abscisic acid-activated signaling pathway; P:post-embryonic development; P:ethylene-activated signaling pathway; P:stomatal movement; P:pollen tube reception; P:negative regulation of cell growth; P:protein autophosphorylation; P:root development; P:defense response to fungus; F:protein serine/threonine kinase activity; F:prot…			IPR001245 (PFAM); G3DSA:2.60.120.430 (GENE3D); IPR024788 (PFAM); G3DSA:3.30.200.20 (GENE3D); G3DSA:1.10.510.10 (GENE3D); mobidb-lite (MOBIDB_LITE); mobidb-lite (MOBIDB_LITE); PTHR27003 (PANTHER); PTHR27003:SF295 (PANTHER); IPR000719 (PROSITE_PROFILES); cd14066 (CDD); IPR011009 (SUPERFAMILY)	P:GO:0006468; F:GO:0004672; F:GO:0005524	P:protein phosphorylation; F:protein kinase activity; F:ATP binding
TRINITY_DN10098_c0_g1_i3	Malectin/receptor-like protein kinase family protein	0	18	P:GO:0009742; P:GO:0009788; P:GO:0009791; P:GO:0009873; P:GO:0010118; P:GO:0010483; P:GO:0030308; P:GO:0046777; P:GO:0048364; P:GO:0050832; F:GO:0004674; F:GO:0005515; F:GO:0005524; C:GO:0009506; C:GO:0016021; C:GO:0016324; C:GO:0043680; C:GO:0090404	P:brassinosteroid mediated signaling pathway; P:negative regulation of abscisic acid-activated signaling pathway; P:post-embryonic development; P:ethylene-activated signaling pathway; P:stomatal movement; P:pollen tube reception; P:negative regulation of cell growth; P:protein autophosphorylation; P:root development; P:defense response to fungus; F:protein serine/threonine kinase activity; F:prot…			G3DSA:1.10.510.10 (GENE3D); G3DSA:3.30.200.20 (GENE3D); IPR024788 (PFAM); IPR001245 (PFAM); G3DSA:2.60.120.430 (GENE3D); mobidb-lite (MOBIDB_LITE); PTHR27003:SF295 (PANTHER); PTHR27003 (PANTHER); IPR000719 (PROSITE_PROFILES); cd14066 (CDD); IPR011009 (SUPERFAMILY)	P:GO:0006468; F:GO:0004672; F:GO:0005524	P:protein phosphorylation; F:protein kinase activity; F:ATP binding
TRINITY_DN10098_c0_g1_i4	receptor-like protein kinase FERONIA	0	18	P:GO:0009742; P:GO:0009788; P:GO:0009791; P:GO:0009873; P:GO:0010118; P:GO:0010483; P:GO:0030308; P:GO:0046777; P:GO:0048364; P:GO:0050832; F:GO:0004674; F:GO:0005515; F:GO:0005524; C:GO:0009506; C:GO:0016021; C:GO:0016324; C:GO:0043680; C:GO:0090404	P:brassinosteroid mediated signaling pathway; P:negative regulation of abscisic acid-activated signaling pathway; P:post-embryonic development; P:ethylene-activated signaling pathway; P:stomatal movement; P:pollen tube reception; P:negative regulation of cell growth; P:protein autophosphorylation; P:root development; P:defense response to fungus; F:protein serine/threonine kinase activity; F:prot…			G3DSA:3.30.200.20 (GENE3D); G3DSA:2.60.120.430 (GENE3D); IPR024788 (PFAM); G3DSA:1.10.510.10 (GENE3D); IPR001245 (PFAM); mobidb-lite (MOBIDB_LITE); mobidb-lite (MOBIDB_LITE); mobidb-lite (MOBIDB_LITE); PTHR27003:SF295 (PANTHER); PTHR27003 (PANTHER); IPR000719 (PROSITE_PROFILES); cd14066 (CDD); IPR011009 (SUPERFAMILY)	P:GO:0006468; F:GO:0004672; F:GO:0005524	P:protein phosphorylation; F:protein kinase activity; F:ATP binding
TRINITY_DN10099_c0_g1_i1	sugar transporter ERD6-like 5 isoform X2	6.54441e-156	4	P:GO:0046323; P:GO:1902600; F:GO:0005351; C:GO:0005887	P:glucose import; P:proton transmembrane transport; F:carbohydrate:proton symporter activity; C:integral component of plasma membrane			IPR005828 (PFAM); G3DSA:1.20.1250.20 (GENE3D); PTHR23500:SF422 (PANTHER); PTHR23500 (PANTHER); IPR020846 (PROSITE_PROFILES); cd17358 (CDD); IPR036259 (SUPERFAMILY)	P:GO:0055085; F:GO:0022857; C:GO:0016021	P:transmembrane transport; F:transmembrane transporter activity; C:integral component of membrane
TRINITY_DN10099_c0_g2_i1	sugar transporter ERD6-like 6 isoform X1	0	7	P:GO:0010030; P:GO:0046323; P:GO:1902600; F:GO:0005351; C:GO:0005794; C:GO:0005887; C:GO:0009705	P:positive regulation of seed germination; P:glucose import; P:proton transmembrane transport; F:carbohydrate:proton symporter activity; C:Golgi apparatus; C:integral component of plasma membrane; C:plant-type vacuole membrane			IPR003663 (PRINTS); IPR005828 (PFAM); G3DSA:1.20.1250.20 (GENE3D); PTHR23500:SF441 (PANTHER); PTHR23500 (PANTHER); IPR020846 (PROSITE_PROFILES); cd17358 (CDD); IPR036259 (SUPERFAMILY)	P:GO:0055085; F:GO:0022857; C:GO:0016020; C:GO:0016021	P:transmembrane transport; F:transmembrane transporter activity; C:membrane; C:integral component of membrane
TRINITY_DN10099_c0_g2_i2	sugar transporter ERD6-like 6 isoform X1	0	7	P:GO:0010030; P:GO:0046323; P:GO:1902600; F:GO:0005351; C:GO:0005794; C:GO:0005887; C:GO:0009705	P:positive regulation of seed germination; P:glucose import; P:proton transmembrane transport; F:carbohydrate:proton symporter activity; C:Golgi apparatus; C:integral component of plasma membrane; C:plant-type vacuole membrane			IPR003663 (PRINTS); IPR005828 (PFAM); G3DSA:1.20.1250.20 (GENE3D); IPR003663 (TIGRFAM); PTHR23500:SF441 (PANTHER); PTHR23500 (PANTHER); IPR020846 (PROSITE_PROFILES); cd17358 (CDD); IPR036259 (SUPERFAMILY)	P:GO:0055085; F:GO:0022857; C:GO:0016020; C:GO:0016021	P:transmembrane transport; F:transmembrane transporter activity; C:membrane; C:integral component of membrane
TRINITY_DN10099_c0_g2_i3	sugar transporter ERD6-like 6 isoform X1	0	7	P:GO:0010030; P:GO:0046323; P:GO:1902600; F:GO:0005351; C:GO:0005794; C:GO:0005887; C:GO:0009705	P:positive regulation of seed germination; P:glucose import; P:proton transmembrane transport; F:carbohydrate:proton symporter activity; C:Golgi apparatus; C:integral component of plasma membrane; C:plant-type vacuole membrane			IPR003663 (PRINTS); IPR005828 (PFAM); G3DSA:1.20.1250.20 (GENE3D); PTHR23500:SF441 (PANTHER); PTHR23500 (PANTHER); IPR020846 (PROSITE_PROFILES); cd17358 (CDD); IPR036259 (SUPERFAMILY)	P:GO:0055085; F:GO:0022857; C:GO:0016020; C:GO:0016021	P:transmembrane transport; F:transmembrane transporter activity; C:membrane; C:integral component of membrane
TRINITY_DN10099_c0_g2_i5	sugar transporter ERD6-like 6 isoform X1	0	7	P:GO:0010030; P:GO:0046323; P:GO:1902600; F:GO:0005351; C:GO:0005794; C:GO:0005887; C:GO:0009705	P:positive regulation of seed germination; P:glucose import; P:proton transmembrane transport; F:carbohydrate:proton symporter activity; C:Golgi apparatus; C:integral component of plasma membrane; C:plant-type vacuole membrane			IPR003663 (PRINTS); IPR005828 (PFAM); G3DSA:1.20.1250.20 (GENE3D); PTHR23500:SF441 (PANTHER); PTHR23500 (PANTHER); IPR020846 (PROSITE_PROFILES); cd17358 (CDD); IPR036259 (SUPERFAMILY)	P:GO:0055085; F:GO:0022857; C:GO:0016020; C:GO:0016021	P:transmembrane transport; F:transmembrane transporter activity; C:membrane; C:integral component of membrane
TRINITY_DN10099_c0_g2_i6	sugar transporter ERD6-like 6 isoform X1	0	7	P:GO:0010030; P:GO:0046323; P:GO:1902600; F:GO:0005351; C:GO:0005794; C:GO:0005887; C:GO:0009705	P:positive regulation of seed germination; P:glucose import; P:proton transmembrane transport; F:carbohydrate:proton symporter activity; C:Golgi apparatus; C:integral component of plasma membrane; C:plant-type vacuole membrane			IPR003663 (PRINTS); G3DSA:1.20.1250.20 (GENE3D); IPR003663 (TIGRFAM); IPR005828 (PFAM); PTHR23500:SF441 (PANTHER); PTHR23500 (PANTHER); IPR020846 (PROSITE_PROFILES); cd17358 (CDD); IPR036259 (SUPERFAMILY)	P:GO:0055085; F:GO:0022857; C:GO:0016020; C:GO:0016021	P:transmembrane transport; F:transmembrane transporter activity; C:membrane; C:integral component of membrane
TRINITY_DN10099_c0_g2_i7	sugar transporter ERD6-like 6 isoform X1	0	7	P:GO:0010030; P:GO:0046323; P:GO:1902600; F:GO:0005351; C:GO:0005794; C:GO:0005887; C:GO:0009705	P:positive regulation of seed germination; P:glucose import; P:proton transmembrane transport; F:carbohydrate:proton symporter activity; C:Golgi apparatus; C:integral component of plasma membrane; C:plant-type vacuole membrane			IPR003663 (PRINTS); G3DSA:1.20.1250.20 (GENE3D); IPR005828 (PFAM); IPR003663 (TIGRFAM); PTHR23500:SF441 (PANTHER); PTHR23500 (PANTHER); IPR020846 (PROSITE_PROFILES); cd17358 (CDD); IPR036259 (SUPERFAMILY)	P:GO:0055085; F:GO:0022857; C:GO:0016020; C:GO:0016021	P:transmembrane transport; F:transmembrane transporter activity; C:membrane; C:integral component of membrane
TRINITY_DN101_c0_g1_i1	heat shock factor 4	0	7	P:GO:0010200; P:GO:0045892; P:GO:0061408; F:GO:0000978; F:GO:0003700; C:GO:0005634; C:GO:0042025	P:response to chitin; P:negative regulation of transcription, DNA-templated; P:positive regulation of transcription from RNA polymerase II promoter in response to heat stress; F:RNA polymerase II cis-regulatory region sequence-specific DNA binding; F:DNA-binding transcription factor activity; C:nucleus; C:host cell nucleus			IPR000232 (PRINTS); IPR000232 (PFAM); IPR036388 (G3DSA:1.10.10.GENE3D); mobidb-lite (MOBIDB_LITE); IPR027725 (PANTHER); PTHR10015:SF333 (PANTHER); IPR036390 (SUPERFAMILY)	P:GO:0006355; F:GO:0003700; F:GO:0043565; C:GO:0042025	P:regulation of transcription, DNA-templated; F:DNA-binding transcription factor activity; F:sequence-specific DNA binding; C:host cell nucleus
TRINITY_DN101_c0_g1_i2	Heat shock factor 4	1.78036e-167	5	P:GO:0010200; P:GO:0061408; F:GO:0000978; F:GO:0003700; C:GO:0005634	P:response to chitin; P:positive regulation of transcription from RNA polymerase II promoter in response to heat stress; F:RNA polymerase II cis-regulatory region sequence-specific DNA binding; F:DNA-binding transcription factor activity; C:nucleus			IPR027725 (PANTHER); PTHR10015:SF333 (PANTHER)	no GO terms	no GO terms
TRINITY_DN101_c0_g1_i3	heat shock factor 4	0	7	P:GO:0010200; P:GO:0045892; P:GO:0061408; F:GO:0000978; F:GO:0003700; C:GO:0005634; C:GO:0042025	P:response to chitin; P:negative regulation of transcription, DNA-templated; P:positive regulation of transcription from RNA polymerase II promoter in response to heat stress; F:RNA polymerase II cis-regulatory region sequence-specific DNA binding; F:DNA-binding transcription factor activity; C:nucleus; C:host cell nucleus			IPR000232 (PRINTS); IPR000232 (PFAM); IPR036388 (G3DSA:1.10.10.GENE3D); mobidb-lite (MOBIDB_LITE); IPR027725 (PANTHER); PTHR10015:SF333 (PANTHER); IPR036390 (SUPERFAMILY)	P:GO:0006355; F:GO:0003700; F:GO:0043565; C:GO:0042025	P:regulation of transcription, DNA-templated; F:DNA-binding transcription factor activity; F:sequence-specific DNA binding; C:host cell nucleus
TRINITY_DN101_c0_g1_i4	heat shock factor 6	1.02497e-177	8	P:GO:0008356; P:GO:0010200; P:GO:0045892; P:GO:0061408; F:GO:0000978; F:GO:0003700; C:GO:0005634; C:GO:0042025	P:asymmetric cell division; P:response to chitin; P:negative regulation of transcription, DNA-templated; P:positive regulation of transcription from RNA polymerase II promoter in response to heat stress; F:RNA polymerase II cis-regulatory region sequence-specific DNA binding; F:DNA-binding transcription factor activity; C:nucleus; C:host cell nucleus			IPR000232 (PRINTS); IPR036388 (G3DSA:1.10.10.GENE3D); IPR000232 (PFAM); mobidb-lite (MOBIDB_LITE); PTHR10015:SF333 (PANTHER); IPR027725 (PANTHER); IPR036390 (SUPERFAMILY)	P:GO:0006355; F:GO:0003700; F:GO:0043565; C:GO:0042025	P:regulation of transcription, DNA-templated; F:DNA-binding transcription factor activity; F:sequence-specific DNA binding; C:host cell nucleus
TRINITY_DN101_c0_g1_i5	Heat shock factor 4	0	8	P:GO:0008356; P:GO:0010200; P:GO:0045892; P:GO:0061408; F:GO:0000978; F:GO:0003700; C:GO:0005634; C:GO:0042025	P:asymmetric cell division; P:response to chitin; P:negative regulation of transcription, DNA-templated; P:positive regulation of transcription from RNA polymerase II promoter in response to heat stress; F:RNA polymerase II cis-regulatory region sequence-specific DNA binding; F:DNA-binding transcription factor activity; C:nucleus; C:host cell nucleus			IPR000232 (PRINTS); IPR000232 (PFAM); IPR036388 (G3DSA:1.10.10.GENE3D); mobidb-lite (MOBIDB_LITE); PTHR10015:SF333 (PANTHER); IPR027725 (PANTHER); IPR036390 (SUPERFAMILY)	P:GO:0006355; F:GO:0003700; F:GO:0043565; C:GO:0042025	P:regulation of transcription, DNA-templated; F:DNA-binding transcription factor activity; F:sequence-specific DNA binding; C:host cell nucleus
TRINITY_DN101_c0_g1_i6	Heat shock factor 4	0	5	P:GO:0010200; P:GO:0061408; F:GO:0000978; F:GO:0003700; C:GO:0005634	P:response to chitin; P:positive regulation of transcription from RNA polymerase II promoter in response to heat stress; F:RNA polymerase II cis-regulatory region sequence-specific DNA binding; F:DNA-binding transcription factor activity; C:nucleus			IPR027725 (PANTHER); PTHR10015:SF333 (PANTHER)	no GO terms	no GO terms
TRINITY_DN101_c0_g1_i7	heat shock factor 4	0	6	P:GO:0010200; P:GO:0045892; P:GO:0061408; F:GO:0000978; F:GO:0003700; C:GO:0005634	P:response to chitin; P:negative regulation of transcription, DNA-templated; P:positive regulation of transcription from RNA polymerase II promoter in response to heat stress; F:RNA polymerase II cis-regulatory region sequence-specific DNA binding; F:DNA-binding transcription factor activity; C:nucleus			IPR027725 (PANTHER); PTHR10015:SF333 (PANTHER)	no GO terms	no GO terms
TRINITY_DN1010_c0_g1_i1	P-loop containing nucleoside triphosphate hydrolases superfamily protein	0	5	P:GO:0009987; F:GO:0005524; F:GO:0016887; C:GO:0005759; C:GO:0009570	P:cellular process; F:ATP binding; F:ATPase activity; C:mitochondrial matrix; C:chloroplast stroma	EC:3.6.1.3; EC:3.6.1.15	Adenosinetriphosphatase; Nucleoside-triphosphate phosphatase	G3DSA:3.40.50.300 (GENE3D); IPR016300 (TIGRFAM); IPR025723 (PFAM); IPR016300 (PANTHER); PTHR10803:SF17 (PANTHER); cd02035 (CDD); IPR027417 (SUPERFAMILY)	F:GO:0005524; F:GO:0016887	F:ATP binding; F:ATPase activity
TRINITY_DN10100_c0_g1_i1	Lysine-ketoglutarate reductase/saccharopine dehydrogenase bifunctional enzyme	4.23704e-52	5	P:GO:0019477; P:GO:0080167; F:GO:0047130; C:GO:0005829; C:GO:0016020	P:L-lysine catabolic process; P:response to karrikin; F:saccharopine dehydrogenase (NADP+, L-lysine-forming) activity; C:cytosol; C:membrane	EC:1.5.1.8	Saccharopine dehydrogenase (NADP(+), L-lysine-forming)	G3DSA:3.40.50.720 (GENE3D); G3DSA:3.30.360.10 (GENE3D); IPR032095 (PFAM); PTHR11133:SF18 (PANTHER); PTHR11133 (PANTHER)	no GO terms	no GO terms
TRINITY_DN10100_c0_g1_i2	Lysine-ketoglutarate reductase/saccharopine dehydrogenase bifunctional enzyme	3.33238e-58	7	P:GO:0033512; P:GO:0055114; P:GO:0080167; F:GO:0047130; F:GO:0047131; C:GO:0005829; C:GO:0016021	P:L-lysine catabolic process to acetyl-CoA via saccharopine; P:oxidation-reduction process; P:response to karrikin; F:saccharopine dehydrogenase (NADP+, L-lysine-forming) activity; F:saccharopine dehydrogenase (NAD+, L-glutamate-forming) activity; C:cytosol; C:integral component of membrane	EC:1.5.1.8; EC:1.5.1.9	Saccharopine dehydrogenase (NADP(+), L-lysine-forming); Saccharopine dehydrogenase (NAD(+), L-glutamate-forming)	IPR032095 (PFAM); G3DSA:3.40.50.720 (GENE3D); PTHR11133:SF18 (PANTHER); PTHR11133 (PANTHER)	no GO terms	no GO terms
TRINITY_DN10100_c0_g1_i3	alpha-aminoadipic semialdehyde synthase-like isoform X1	1.06126e-08	4	P:GO:0055114; F:GO:0016491; C:GO:0005737; C:GO:0016021	P:oxidation-reduction process; F:oxidoreductase activity; C:cytoplasm; C:integral component of membrane			no IPS match	no IPS match	no IPS match
TRINITY_DN10101_c0_g1_i1	feruloyl CoA ortho-hydroxylase 1-like	0	6	P:GO:0009805; P:GO:0010421; P:GO:0055114; P:GO:1990641; F:GO:0046872; F:GO:0051213	P:coumarin biosynthetic process; P:hydrogen peroxide-mediated programmed cell death; P:oxidation-reduction process; P:response to iron ion starvation; F:metal ion binding; F:dioxygenase activity			IPR027443 (G3DSA:2.60.120.GENE3D); IPR005123 (PFAM); IPR026992 (PFAM); PTHR10209:SF591 (PANTHER); PTHR10209 (PANTHER); IPR005123 (PROSITE_PROFILES); SSF51197 (SUPERFAMILY)	P:GO:0055114; F:GO:0016491	P:oxidation-reduction process; F:oxidoreductase activity
TRINITY_DN10101_c0_g1_i2	feruloyl CoA ortho-hydroxylase 1-like	0	6	P:GO:0009805; P:GO:0010421; P:GO:0055114; P:GO:1990641; F:GO:0046872; F:GO:0051213	P:coumarin biosynthetic process; P:hydrogen peroxide-mediated programmed cell death; P:oxidation-reduction process; P:response to iron ion starvation; F:metal ion binding; F:dioxygenase activity			IPR005123 (PFAM); IPR026992 (PFAM); IPR027443 (G3DSA:2.60.120.GENE3D); PTHR10209:SF591 (PANTHER); PTHR10209 (PANTHER); IPR005123 (PROSITE_PROFILES); SSF51197 (SUPERFAMILY)	P:GO:0055114; F:GO:0016491	P:oxidation-reduction process; F:oxidoreductase activity
TRINITY_DN10101_c0_g1_i3	feruloyl CoA ortho-hydroxylase 1-like	0	6	P:GO:0009805; P:GO:0010421; P:GO:0055114; P:GO:1990641; F:GO:0046872; F:GO:0051213	P:coumarin biosynthetic process; P:hydrogen peroxide-mediated programmed cell death; P:oxidation-reduction process; P:response to iron ion starvation; F:metal ion binding; F:dioxygenase activity			IPR026992 (PFAM); IPR027443 (G3DSA:2.60.120.GENE3D); IPR005123 (PFAM); PTHR10209:SF591 (PANTHER); PTHR10209 (PANTHER); IPR005123 (PROSITE_PROFILES); SSF51197 (SUPERFAMILY)	P:GO:0055114; F:GO:0016491	P:oxidation-reduction process; F:oxidoreductase activity
TRINITY_DN10101_c0_g1_i5	feruloyl CoA ortho-hydroxylase 1-like	0	6	P:GO:0009805; P:GO:0010421; P:GO:0055114; P:GO:1990641; F:GO:0046872; F:GO:0051213	P:coumarin biosynthetic process; P:hydrogen peroxide-mediated programmed cell death; P:oxidation-reduction process; P:response to iron ion starvation; F:metal ion binding; F:dioxygenase activity			IPR005123 (PFAM); IPR026992 (PFAM); IPR027443 (G3DSA:2.60.120.GENE3D); PTHR10209 (PANTHER); PTHR10209:SF591 (PANTHER); IPR005123 (PROSITE_PROFILES); SSF51197 (SUPERFAMILY)	P:GO:0055114; F:GO:0016491	P:oxidation-reduction process; F:oxidoreductase activity
TRINITY_DN10102_c0_g1_i1	Calcium-binding EF-hand family protein	9.44907e-134	9	P:GO:0001732; F:GO:0003743; F:GO:0005509; F:GO:0031369; C:GO:0005634; C:GO:0005829; C:GO:0005852; C:GO:0016282; C:GO:0033290	P:formation of cytoplasmic translation initiation complex; F:translation initiation factor activity; F:calcium ion binding; F:translation initiation factor binding; C:nucleus; C:cytosol; C:eukaryotic translation initiation factor 3 complex; C:eukaryotic 43S preinitiation complex; C:eukaryotic 48S preinitiation complex			IPR000717 (PFAM); IPR036388 (G3DSA:1.10.10.GENE3D); mobidb-lite (MOBIDB_LITE); mobidb-lite (MOBIDB_LITE); mobidb-lite (MOBIDB_LITE); IPR027516 (PANTHER); PTHR13937:SF0 (PANTHER); IPR000717 (PROSITE_PROFILES); IPR036390 (SUPERFAMILY)	P:GO:0006413; F:GO:0003723; F:GO:0003743; F:GO:0031369; C:GO:0005852	P:translational initiation; F:RNA binding; F:translation initiation factor activity; F:translation initiation factor binding; C:eukaryotic translation initiation factor 3 complex
TRINITY_DN10102_c0_g1_i2	Calcium-binding EF-hand family protein	5.60504e-152	9	P:GO:0001732; F:GO:0003743; F:GO:0005509; F:GO:0031369; C:GO:0005634; C:GO:0005829; C:GO:0005852; C:GO:0016282; C:GO:0033290	P:formation of cytoplasmic translation initiation complex; F:translation initiation factor activity; F:calcium ion binding; F:translation initiation factor binding; C:nucleus; C:cytosol; C:eukaryotic translation initiation factor 3 complex; C:eukaryotic 43S preinitiation complex; C:eukaryotic 48S preinitiation complex			IPR036388 (G3DSA:1.10.10.GENE3D); IPR008905 (PFAM); IPR000717 (PFAM); mobidb-lite (MOBIDB_LITE); mobidb-lite (MOBIDB_LITE); mobidb-lite (MOBIDB_LITE); PTHR13937:SF0 (PANTHER); IPR027516 (PANTHER); IPR000717 (PROSITE_PROFILES); IPR036390 (SUPERFAMILY)	P:GO:0006413; F:GO:0003723; F:GO:0003743; F:GO:0031369; C:GO:0005852	P:translational initiation; F:RNA binding; F:translation initiation factor activity; F:translation initiation factor binding; C:eukaryotic translation initiation factor 3 complex
TRINITY_DN10103_c0_g1_i1	membrane insertase, putative (DUF1685)	5.16987e-57	7	P:GO:0033499; P:GO:0046835; F:GO:0004335; F:GO:0005524; F:GO:0005534; F:GO:0046872; C:GO:0005829	P:galactose catabolic process via UDP-galactose; P:carbohydrate phosphorylation; F:galactokinase activity; F:ATP binding; F:galactose binding; F:metal ion binding; C:cytosol	EC:2.7.1.6	Galactokinase	IPR019539 (PFAM); IPR014721 (G3DSA:3.30.230.GENE3D); PTHR10457 (PANTHER); PTHR10457:SF7 (PANTHER); IPR020568 (SUPERFAMILY)	F:GO:0005534	F:galactose binding
TRINITY_DN10103_c0_g1_i2	membrane insertase, putative (DUF1685)	1.41764e-55	7	P:GO:0033499; P:GO:0046835; F:GO:0004335; F:GO:0005524; F:GO:0005534; F:GO:0046872; C:GO:0005829	P:galactose catabolic process via UDP-galactose; P:carbohydrate phosphorylation; F:galactokinase activity; F:ATP binding; F:galactose binding; F:metal ion binding; C:cytosol	EC:2.7.1.6	Galactokinase	IPR019539 (PFAM); IPR014721 (G3DSA:3.30.230.GENE3D); PTHR10457 (PANTHER); PTHR10457:SF7 (PANTHER); IPR020568 (SUPERFAMILY)	F:GO:0005534	F:galactose binding
TRINITY_DN10103_c0_g1_i3	membrane insertase, putative (DUF1685)	8.41465e-57	9	P:GO:0009451; P:GO:0033499; P:GO:0046835; F:GO:0004335; F:GO:0005524; F:GO:0005534; F:GO:0008270; C:GO:0005829; C:GO:0043231	P:RNA modification; P:galactose catabolic process via UDP-galactose; P:carbohydrate phosphorylation; F:galactokinase activity; F:ATP binding; F:galactose binding; F:zinc ion binding; C:cytosol; C:intracellular membrane-bounded organelle	EC:2.7.1.6	Galactokinase	IPR014721 (G3DSA:3.30.230.GENE3D); IPR019539 (PFAM); PTHR10457 (PANTHER); PTHR10457:SF7 (PANTHER); IPR020568 (SUPERFAMILY)	F:GO:0005534	F:galactose binding
TRINITY_DN10103_c0_g1_i4	membrane insertase, putative (DUF1685)	9.11465e-78	7	P:GO:0033499; P:GO:0046835; F:GO:0004335; F:GO:0005524; F:GO:0005534; F:GO:0046872; C:GO:0005829	P:galactose catabolic process via UDP-galactose; P:carbohydrate phosphorylation; F:galactokinase activity; F:ATP binding; F:galactose binding; F:metal ion binding; C:cytosol	EC:2.7.1.6	Galactokinase	IPR019539 (PFAM); IPR014721 (G3DSA:3.30.230.GENE3D); PTHR10457:SF7 (PANTHER); PTHR10457 (PANTHER); IPR020568 (SUPERFAMILY)	F:GO:0005534	F:galactose binding
TRINITY_DN10103_c0_g1_i5	membrane insertase, putative (DUF1685)	8.28731e-62	6	P:GO:0033499; P:GO:0046835; F:GO:0004335; F:GO:0005524; F:GO:0005534; C:GO:0005829	P:galactose catabolic process via UDP-galactose; P:carbohydrate phosphorylation; F:galactokinase activity; F:ATP binding; F:galactose binding; C:cytosol	EC:2.7.1.6	Galactokinase	IPR019539 (PFAM); IPR014721 (G3DSA:3.30.230.GENE3D); PTHR10457 (PANTHER); PTHR10457:SF7 (PANTHER); IPR020568 (SUPERFAMILY)	F:GO:0005534	F:galactose binding
TRINITY_DN10103_c0_g1_i6	membrane insertase, putative (DUF1685)	2.65336e-81	7	P:GO:0033499; P:GO:0046835; F:GO:0004335; F:GO:0005524; F:GO:0005534; F:GO:0046872; C:GO:0005829	P:galactose catabolic process via UDP-galactose; P:carbohydrate phosphorylation; F:galactokinase activity; F:ATP binding; F:galactose binding; F:metal ion binding; C:cytosol	EC:2.7.1.6	Galactokinase	IPR019539 (PFAM); IPR014721 (G3DSA:3.30.230.GENE3D); PTHR10457 (PANTHER); PTHR10457:SF7 (PANTHER); IPR020568 (SUPERFAMILY)	F:GO:0005534	F:galactose binding
TRINITY_DN10103_c0_g2_i1	galactose kinase	3.66836e-48	7	P:GO:0033499; P:GO:0046835; F:GO:0004335; F:GO:0005524; F:GO:0005534; F:GO:0046872; C:GO:0005829	P:galactose catabolic process via UDP-galactose; P:carbohydrate phosphorylation; F:galactokinase activity; F:ATP binding; F:galactose binding; F:metal ion binding; C:cytosol	EC:2.7.1.6	Galactokinase	IPR019539 (PFAM); IPR014721 (G3DSA:3.30.230.GENE3D); PTHR10457 (PANTHER); PTHR10457:SF7 (PANTHER); IPR020568 (SUPERFAMILY)	F:GO:0005534	F:galactose binding
TRINITY_DN10104_c0_g1_i1	17.3 kDa class I heat shock protein-like	1.60208e-59	7	P:GO:0006457; P:GO:0009408; P:GO:0009651; P:GO:0042542; P:GO:0051259; F:GO:0043621; F:GO:0051082	P:protein folding; P:response to heat; P:response to salt stress; P:response to hydrogen peroxide; P:protein complex oligomerization; F:protein self-association; F:unfolded protein binding			IPR008978 (G3DSA:2.60.40.GENE3D); IPR031107 (PANTHER); PTHR11527:SF276 (PANTHER); IPR008978 (SUPERFAMILY)	no GO terms	no GO terms
TRINITY_DN10104_c0_g1_i2	17.3 kDa class I heat shock protein-like	4.15568e-72	7	P:GO:0006457; P:GO:0009408; P:GO:0009651; P:GO:0042542; P:GO:0051259; F:GO:0043621; F:GO:0051082	P:protein folding; P:response to heat; P:response to salt stress; P:response to hydrogen peroxide; P:protein complex oligomerization; F:protein self-association; F:unfolded protein binding			IPR008978 (G3DSA:2.60.40.GENE3D); IPR031107 (PANTHER); PTHR11527:SF276 (PANTHER); IPR008978 (SUPERFAMILY)	no GO terms	no GO terms
TRINITY_DN10104_c1_g1_i1	17.3 kDa class I heat shock protein-like	6.67828e-17	7	P:GO:0006457; P:GO:0009408; P:GO:0009651; P:GO:0042542; P:GO:0051259; F:GO:0043621; F:GO:0051082	P:protein folding; P:response to heat; P:response to salt stress; P:response to hydrogen peroxide; P:protein complex oligomerization; F:protein self-association; F:unfolded protein binding			no IPS match	no IPS match	no IPS match
TRINITY_DN10105_c0_g1_i1	protein MODIFIER OF SNC1 1-like isoform X1	9.15586e-60	1	P:GO:0040029	P:regulation of gene expression, epigenetic			mobidb-lite (MOBIDB_LITE); mobidb-lite (MOBIDB_LITE)	no GO terms	no GO terms
TRINITY_DN10106_c0_g1_i1	---NA---							no IPS match	no IPS match	no IPS match
TRINITY_DN10106_c0_g1_i2	Homeobox-leucine zipper family protein / lipid-binding START domain-containing protein	1.0018e-45	14	P:GO:0006355; P:GO:0009855; P:GO:0009944; P:GO:0009956; P:GO:0010051; P:GO:0010072; P:GO:0010089; P:GO:0030154; P:GO:0080060; F:GO:0000976; F:GO:0003700; F:GO:0008289; C:GO:0005634; C:GO:0016021	P:regulation of transcription, DNA-templated; P:determination of bilateral symmetry; P:polarity specification of adaxial/abaxial axis; P:radial pattern formation; P:xylem and phloem pattern formation; P:primary shoot apical meristem specification; P:xylem development; P:cell differentiation; P:integument development; F:transcription regulatory region sequence-specific DNA binding; F:DNA-binding t…			no IPS match	no IPS match	no IPS match
TRINITY_DN10106_c0_g2_i1	---NA---							mobidb-lite (MOBIDB_LITE)	no GO terms	no GO terms
TRINITY_DN10107_c0_g1_i1	AT4G29520-like protein	3.0034e-98	6	P:GO:0009408; P:GO:0061077; F:GO:0005515; F:GO:0044183; C:GO:0005783; C:GO:0005886	P:response to heat; P:chaperone-mediated protein folding; F:protein binding; F:protein folding chaperone; C:endoplasmic reticulum; C:plasma membrane			mobidb-lite (MOBIDB_LITE); PTHR36058:SF2 (PANTHER); PTHR36058 (PANTHER)	no GO terms	no GO terms
TRINITY_DN10108_c0_g1_i1	Zinc finger (C3HC4-type RING finger) family protein	3.17874e-36						IPR032838 (PFAM); mobidb-lite (MOBIDB_LITE); PTHR10579:SF111 (PANTHER); PTHR10579 (PANTHER)	no GO terms	no GO terms
TRINITY_DN10109_c0_g1_i1	ROOT GROWTH DEFECTIVE 3	6.28176e-22	1	F:GO:0005524	F:ATP binding			no IPS match	no IPS match	no IPS match
TRINITY_DN1011_c0_g1_i1	autophagy-related protein 9-like isoform X1	0	10	P:GO:0000422; P:GO:0015031; P:GO:0034497; P:GO:0044805; P:GO:0050832; C:GO:0000407; C:GO:0005776; C:GO:0005794; C:GO:0016021; C:GO:0030659	P:autophagy of mitochondrion; P:protein transport; P:protein localization to phagophore assembly site; P:late nucleophagy; P:defense response to fungus; C:phagophore assembly site; C:autophagosome; C:Golgi apparatus; C:integral component of membrane; C:cytoplasmic vesicle membrane			IPR007241 (PFAM); mobidb-lite (MOBIDB_LITE); mobidb-lite (MOBIDB_LITE); IPR007241 (PANTHER); PTHR13038:SF18 (PANTHER)	P:GO:0006914	P:autophagy
TRINITY_DN1011_c0_g1_i10	autophagy-related protein 9-like isoform X1	0	10	P:GO:0000422; P:GO:0015031; P:GO:0034497; P:GO:0044805; P:GO:0050832; C:GO:0000407; C:GO:0005776; C:GO:0005794; C:GO:0016021; C:GO:0030659	P:autophagy of mitochondrion; P:protein transport; P:protein localization to phagophore assembly site; P:late nucleophagy; P:defense response to fungus; C:phagophore assembly site; C:autophagosome; C:Golgi apparatus; C:integral component of membrane; C:cytoplasmic vesicle membrane			IPR007241 (PFAM); mobidb-lite (MOBIDB_LITE); mobidb-lite (MOBIDB_LITE); IPR007241 (PANTHER); PTHR13038:SF18 (PANTHER)	P:GO:0006914	P:autophagy
TRINITY_DN1011_c0_g1_i3	autophagy-related protein 9-like isoform X1	0	9	P:GO:0000422; P:GO:0015031; P:GO:0034497; P:GO:0044805; C:GO:0000407; C:GO:0005776; C:GO:0005794; C:GO:0016021; C:GO:0030659	P:autophagy of mitochondrion; P:protein transport; P:protein localization to phagophore assembly site; P:late nucleophagy; C:phagophore assembly site; C:autophagosome; C:Golgi apparatus; C:integral component of membrane; C:cytoplasmic vesicle membrane			mobidb-lite (MOBIDB_LITE); IPR007241 (PANTHER); PTHR13038:SF18 (PANTHER)	P:GO:0006914	P:autophagy
TRINITY_DN1011_c0_g1_i4	autophagy-related protein 9-like isoform X1	0	10	P:GO:0000422; P:GO:0015031; P:GO:0034497; P:GO:0044805; P:GO:0050832; C:GO:0000407; C:GO:0005776; C:GO:0005794; C:GO:0016021; C:GO:0030659	P:autophagy of mitochondrion; P:protein transport; P:protein localization to phagophore assembly site; P:late nucleophagy; P:defense response to fungus; C:phagophore assembly site; C:autophagosome; C:Golgi apparatus; C:integral component of membrane; C:cytoplasmic vesicle membrane			mobidb-lite (MOBIDB_LITE); mobidb-lite (MOBIDB_LITE); IPR007241 (PANTHER); PTHR13038:SF18 (PANTHER)	P:GO:0006914	P:autophagy
TRINITY_DN1011_c0_g1_i5	autophagy-related protein 9-like isoform X1	0	10	P:GO:0000422; P:GO:0015031; P:GO:0034497; P:GO:0044805; P:GO:0050832; C:GO:0000407; C:GO:0005776; C:GO:0005794; C:GO:0016021; C:GO:0030659	P:autophagy of mitochondrion; P:protein transport; P:protein localization to phagophore assembly site; P:late nucleophagy; P:defense response to fungus; C:phagophore assembly site; C:autophagosome; C:Golgi apparatus; C:integral component of membrane; C:cytoplasmic vesicle membrane			IPR007241 (PFAM); mobidb-lite (MOBIDB_LITE); mobidb-lite (MOBIDB_LITE); PTHR13038:SF18 (PANTHER); IPR007241 (PANTHER)	P:GO:0006914	P:autophagy
TRINITY_DN1011_c0_g1_i6	autophagy-related protein 9-like isoform X1	0	10	P:GO:0000422; P:GO:0015031; P:GO:0034497; P:GO:0044805; P:GO:0050832; C:GO:0000407; C:GO:0005776; C:GO:0005794; C:GO:0016021; C:GO:0030659	P:autophagy of mitochondrion; P:protein transport; P:protein localization to phagophore assembly site; P:late nucleophagy; P:defense response to fungus; C:phagophore assembly site; C:autophagosome; C:Golgi apparatus; C:integral component of membrane; C:cytoplasmic vesicle membrane			IPR007241 (PFAM); mobidb-lite (MOBIDB_LITE); mobidb-lite (MOBIDB_LITE); PTHR13038:SF18 (PANTHER); IPR007241 (PANTHER)	P:GO:0006914	P:autophagy
TRINITY_DN1011_c0_g1_i7	autophagy-related protein 9-like isoform X1	0	10	P:GO:0000422; P:GO:0015031; P:GO:0034497; P:GO:0044805; P:GO:0050832; C:GO:0000407; C:GO:0005776; C:GO:0005794; C:GO:0016021; C:GO:0030659	P:autophagy of mitochondrion; P:protein transport; P:protein localization to phagophore assembly site; P:late nucleophagy; P:defense response to fungus; C:phagophore assembly site; C:autophagosome; C:Golgi apparatus; C:integral component of membrane; C:cytoplasmic vesicle membrane			IPR007241 (PFAM); mobidb-lite (MOBIDB_LITE); mobidb-lite (MOBIDB_LITE); IPR007241 (PANTHER); PTHR13038:SF18 (PANTHER)	P:GO:0006914	P:autophagy
TRINITY_DN1011_c0_g1_i8	autophagy-related protein 9-like isoform X1	0	10	P:GO:0000422; P:GO:0015031; P:GO:0034497; P:GO:0044805; P:GO:0050832; C:GO:0000407; C:GO:0005776; C:GO:0005794; C:GO:0016021; C:GO:0030659	P:autophagy of mitochondrion; P:protein transport; P:protein localization to phagophore assembly site; P:late nucleophagy; P:defense response to fungus; C:phagophore assembly site; C:autophagosome; C:Golgi apparatus; C:integral component of membrane; C:cytoplasmic vesicle membrane			mobidb-lite (MOBIDB_LITE); mobidb-lite (MOBIDB_LITE); IPR007241 (PANTHER); PTHR13038:SF18 (PANTHER)	P:GO:0006914	P:autophagy
TRINITY_DN1011_c0_g1_i9	autophagy-related protein 9-like isoform X1	0	10	P:GO:0000422; P:GO:0015031; P:GO:0034497; P:GO:0044805; P:GO:0050832; C:GO:0000407; C:GO:0005776; C:GO:0005794; C:GO:0016021; C:GO:0030659	P:autophagy of mitochondrion; P:protein transport; P:protein localization to phagophore assembly site; P:late nucleophagy; P:defense response to fungus; C:phagophore assembly site; C:autophagosome; C:Golgi apparatus; C:integral component of membrane; C:cytoplasmic vesicle membrane			IPR007241 (PFAM); mobidb-lite (MOBIDB_LITE); mobidb-lite (MOBIDB_LITE); PTHR13038:SF18 (PANTHER); IPR007241 (PANTHER)	P:GO:0006914	P:autophagy
TRINITY_DN1011_c1_g1_i1	autophagy-related protein 9-like isoform X1	9.24825e-165	10	P:GO:0000422; P:GO:0015031; P:GO:0034497; P:GO:0044805; P:GO:0050832; C:GO:0000407; C:GO:0000421; C:GO:0005794; C:GO:0016021; C:GO:0030659	P:autophagy of mitochondrion; P:protein transport; P:protein localization to phagophore assembly site; P:late nucleophagy; P:defense response to fungus; C:phagophore assembly site; C:autophagosome membrane; C:Golgi apparatus; C:integral component of membrane; C:cytoplasmic vesicle membrane			IPR007241 (PFAM); mobidb-lite (MOBIDB_LITE); PTHR13038:SF18 (PANTHER); IPR007241 (PANTHER)	P:GO:0006914	P:autophagy
TRINITY_DN1011_c1_g1_i10	autophagy-related protein 9-like isoform X1	2.46418e-168	10	P:GO:0000422; P:GO:0015031; P:GO:0034497; P:GO:0044805; P:GO:0050832; C:GO:0000407; C:GO:0000421; C:GO:0005794; C:GO:0016021; C:GO:0030659	P:autophagy of mitochondrion; P:protein transport; P:protein localization to phagophore assembly site; P:late nucleophagy; P:defense response to fungus; C:phagophore assembly site; C:autophagosome membrane; C:Golgi apparatus; C:integral component of membrane; C:cytoplasmic vesicle membrane			IPR007241 (PFAM); mobidb-lite (MOBIDB_LITE); PTHR13038:SF18 (PANTHER); IPR007241 (PANTHER)	P:GO:0006914	P:autophagy
TRINITY_DN1011_c1_g1_i11	autophagy-related protein 9-like isoform X1	3.27061e-170	10	P:GO:0000422; P:GO:0015031; P:GO:0034497; P:GO:0044805; P:GO:0050832; C:GO:0000407; C:GO:0000421; C:GO:0005794; C:GO:0016021; C:GO:0030659	P:autophagy of mitochondrion; P:protein transport; P:protein localization to phagophore assembly site; P:late nucleophagy; P:defense response to fungus; C:phagophore assembly site; C:autophagosome membrane; C:Golgi apparatus; C:integral component of membrane; C:cytoplasmic vesicle membrane			IPR007241 (PFAM); mobidb-lite (MOBIDB_LITE); PTHR13038:SF18 (PANTHER); IPR007241 (PANTHER)	P:GO:0006914	P:autophagy
TRINITY_DN1011_c1_g1_i2	Nucleolar essential protein-related isoform 1	1.48705e-121	6	P:GO:0000462; P:GO:0070475; F:GO:0019843; F:GO:0070037; C:GO:0005730; C:GO:0032040	P:maturation of SSU-rRNA from tricistronic rRNA transcript (SSU-rRNA, 5.8S rRNA, LSU-rRNA); P:rRNA base methylation; F:rRNA binding; F:rRNA (pseudouridine) methyltransferase activity; C:nucleolus; C:small-subunit processome			IPR029026 (G3DSA:3.40.1280.GENE3D); IPR005304 (PFAM); mobidb-lite (MOBIDB_LITE); IPR005304 (PANTHER); cd18088 (CDD); IPR029028 (SUPERFAMILY)	F:GO:0008168	F:methyltransferase activity
TRINITY_DN1011_c1_g1_i3	Nucleolar essential protein-related isoform 1	7.17172e-92	6	P:GO:0000462; P:GO:0070475; F:GO:0019843; F:GO:0070037; C:GO:0005730; C:GO:0032040	P:maturation of SSU-rRNA from tricistronic rRNA transcript (SSU-rRNA, 5.8S rRNA, LSU-rRNA); P:rRNA base methylation; F:rRNA binding; F:rRNA (pseudouridine) methyltransferase activity; C:nucleolus; C:small-subunit processome			IPR029026 (G3DSA:3.40.1280.GENE3D); IPR005304 (PFAM); mobidb-lite (MOBIDB_LITE); PTHR12636:SF14 (PANTHER); IPR005304 (PANTHER); cd18088 (CDD); IPR029028 (SUPERFAMILY)	F:GO:0008168	F:methyltransferase activity
TRINITY_DN1011_c1_g1_i4	autophagy-related protein 9-like isoform X1	7.83215e-138	10	P:GO:0000422; P:GO:0015031; P:GO:0034497; P:GO:0044805; P:GO:0050832; C:GO:0000407; C:GO:0000421; C:GO:0005794; C:GO:0016021; C:GO:0030659	P:autophagy of mitochondrion; P:protein transport; P:protein localization to phagophore assembly site; P:late nucleophagy; P:defense response to fungus; C:phagophore assembly site; C:autophagosome membrane; C:Golgi apparatus; C:integral component of membrane; C:cytoplasmic vesicle membrane			IPR007241 (PFAM); mobidb-lite (MOBIDB_LITE); PTHR13038:SF18 (PANTHER); IPR007241 (PANTHER)	P:GO:0006914	P:autophagy
TRINITY_DN1011_c1_g1_i5	ribosomal RNA small subunit methyltransferase nep-1	1.3447e-59	5	P:GO:0070475; F:GO:0019843; F:GO:0070037; C:GO:0005730; C:GO:0032040	P:rRNA base methylation; F:rRNA binding; F:rRNA (pseudouridine) methyltransferase activity; C:nucleolus; C:small-subunit processome			IPR029026 (G3DSA:3.40.1280.GENE3D); IPR005304 (PFAM); IPR005304 (PANTHER); cd18088 (CDD); IPR029028 (SUPERFAMILY)	F:GO:0008168	F:methyltransferase activity
TRINITY_DN1011_c1_g1_i6	autophagy-related protein 9-like isoform X1	6.68932e-29	10	P:GO:0000422; P:GO:0015031; P:GO:0034497; P:GO:0044805; P:GO:0050832; C:GO:0000407; C:GO:0005776; C:GO:0005794; C:GO:0016021; C:GO:0030659	P:autophagy of mitochondrion; P:protein transport; P:protein localization to phagophore assembly site; P:late nucleophagy; P:defense response to fungus; C:phagophore assembly site; C:autophagosome; C:Golgi apparatus; C:integral component of membrane; C:cytoplasmic vesicle membrane			mobidb-lite (MOBIDB_LITE); PTHR13038:SF18 (PANTHER); IPR007241 (PANTHER)	P:GO:0006914	P:autophagy
TRINITY_DN1011_c1_g1_i7	autophagy-related protein 9-like isoform X1	1.88174e-157	10	P:GO:0000422; P:GO:0015031; P:GO:0034497; P:GO:0044805; P:GO:0050832; C:GO:0000407; C:GO:0000421; C:GO:0005794; C:GO:0016021; C:GO:0030659	P:autophagy of mitochondrion; P:protein transport; P:protein localization to phagophore assembly site; P:late nucleophagy; P:defense response to fungus; C:phagophore assembly site; C:autophagosome membrane; C:Golgi apparatus; C:integral component of membrane; C:cytoplasmic vesicle membrane			IPR007241 (PFAM); mobidb-lite (MOBIDB_LITE); PTHR13038:SF18 (PANTHER); IPR007241 (PANTHER)	P:GO:0006914	P:autophagy
TRINITY_DN1011_c1_g1_i8	autophagy-related protein 9-like isoform X1	4.93784e-160	10	P:GO:0000422; P:GO:0015031; P:GO:0034497; P:GO:0044805; P:GO:0050832; C:GO:0000407; C:GO:0000421; C:GO:0005794; C:GO:0016021; C:GO:0030659	P:autophagy of mitochondrion; P:protein transport; P:protein localization to phagophore assembly site; P:late nucleophagy; P:defense response to fungus; C:phagophore assembly site; C:autophagosome membrane; C:Golgi apparatus; C:integral component of membrane; C:cytoplasmic vesicle membrane			IPR007241 (PFAM); mobidb-lite (MOBIDB_LITE); PTHR13038:SF18 (PANTHER); IPR007241 (PANTHER)	P:GO:0006914	P:autophagy
TRINITY_DN1011_c1_g1_i9	Nucleolar essential protein-related isoform 1	4.52137e-45	6	P:GO:0000462; P:GO:0070475; F:GO:0019843; F:GO:0070037; C:GO:0005730; C:GO:0032040	P:maturation of SSU-rRNA from tricistronic rRNA transcript (SSU-rRNA, 5.8S rRNA, LSU-rRNA); P:rRNA base methylation; F:rRNA binding; F:rRNA (pseudouridine) methyltransferase activity; C:nucleolus; C:small-subunit processome			IPR029026 (G3DSA:3.40.1280.GENE3D); cd18088 (CDD)	no GO terms	no GO terms
TRINITY_DN10110_c0_g1_i1	Transmembrane Fragile-X-F-associated protein	3.433e-40	1	C:GO:0016021	C:integral component of membrane			IPR019396 (PFAM); PTHR46859:SF3 (PANTHER); PTHR46859 (PANTHER)	no GO terms	no GO terms
TRINITY_DN10110_c0_g1_i2	Transmembrane Fragile-X-F-associated protein	2.97927e-76	3	C:GO:0005773; C:GO:0005829; C:GO:0016021	C:vacuole; C:cytosol; C:integral component of membrane			IPR019396 (PFAM); PTHR46859:SF3 (PANTHER); PTHR46859 (PANTHER)	no GO terms	no GO terms
TRINITY_DN10111_c0_g1_i1	Beta-1,4-N-acetylglucosaminyltransferase family protein	1.4562e-23	4	P:GO:0006044; P:GO:0006487; F:GO:0003830; C:GO:0016021	P:N-acetylglucosamine metabolic process; P:protein N-linked glycosylation; F:beta-1,4-mannosylglycoprotein 4-beta-N-acetylglucosaminyltransferase activity; C:integral component of membrane	EC:2.4.1.144	Beta-1,4-mannosyl-glycoprotein 4-beta-N-acetylglucosaminyltransferase	PTHR12224:SF4 (PANTHER); IPR006813 (PANTHER)	P:GO:0006487; F:GO:0003830; C:GO:0016020	P:protein N-linked glycosylation; F:beta-1,4-mannosylglycoprotein 4-beta-N-acetylglucosaminyltransferase activity; C:membrane
TRINITY_DN10111_c0_g2_i1	Beta-1,4-N-acetylglucosaminyltransferase family protein	2.93353e-23	4	P:GO:0006044; P:GO:0006487; F:GO:0003830; C:GO:0016021	P:N-acetylglucosamine metabolic process; P:protein N-linked glycosylation; F:beta-1,4-mannosylglycoprotein 4-beta-N-acetylglucosaminyltransferase activity; C:integral component of membrane	EC:2.4.1.144	Beta-1,4-mannosyl-glycoprotein 4-beta-N-acetylglucosaminyltransferase	PTHR12224:SF4 (PANTHER); IPR006813 (PANTHER)	P:GO:0006487; F:GO:0003830; C:GO:0016020	P:protein N-linked glycosylation; F:beta-1,4-mannosylglycoprotein 4-beta-N-acetylglucosaminyltransferase activity; C:membrane
TRINITY_DN10112_c0_g1_i1	LRR receptor-like serine/threonine-protein kinase FLS2	5.09127e-33	2	F:GO:0005515; C:GO:0016021	F:protein binding; C:integral component of membrane			IPR001611 (PFAM); IPR032675 (G3DSA:3.80.10.GENE3D); PTHR27004 (PANTHER); PTHR27004:SF237 (PANTHER); SSF52058 (SUPERFAMILY)	F:GO:0005515	F:protein binding
TRINITY_DN10113_c0_g1_i1	E3 ubiquitin-protein ligase SINAT2-like	1.64073e-15	9	P:GO:0006511; P:GO:0007275; P:GO:0016567; F:GO:0005515; F:GO:0008270; F:GO:0061630; C:GO:0005737; C:GO:0016021; C:GO:0042025	P:ubiquitin-dependent protein catabolic process; P:multicellular organism development; P:protein ubiquitination; F:protein binding; F:zinc ion binding; F:ubiquitin protein ligase activity; C:cytoplasm; C:integral component of membrane; C:host cell nucleus			no IPS match	no IPS match	no IPS match
TRINITY_DN10113_c0_g2_i1	E3 ubiquitin-protein ligase SINAT2	1.98398e-13	9	P:GO:0006511; P:GO:0007275; P:GO:0016567; F:GO:0005515; F:GO:0008270; F:GO:0061630; C:GO:0005737; C:GO:0016021; C:GO:0042025	P:ubiquitin-dependent protein catabolic process; P:multicellular organism development; P:protein ubiquitination; F:protein binding; F:zinc ion binding; F:ubiquitin protein ligase activity; C:cytoplasm; C:integral component of membrane; C:host cell nucleus			no IPS match	no IPS match	no IPS match
TRINITY_DN10114_c0_g1_i1	kinetochore protein	0	3	P:GO:0007059; C:GO:0000777; C:GO:0031262	P:chromosome segregation; C:condensed chromosome kinetochore; C:Ndc80 complex			IPR013255 (PFAM); G3DSA:3.30.457.50 (GENE3D); mobidb-lite (MOBIDB_LITE); PTHR14281 (PANTHER)	no GO terms	no GO terms
TRINITY_DN10115_c0_g1_i1	paired amphipathic helix protein Sin3-like 2 isoform X1	3.03792e-14	7	P:GO:0000122; P:GO:0016575; F:GO:0003714; F:GO:0004407; C:GO:0000118; C:GO:0000785; C:GO:0005829	P:negative regulation of transcription by RNA polymerase II; P:histone deacetylation; F:transcription corepressor activity; F:histone deacetylase activity; C:histone deacetylase complex; C:chromatin; C:cytosol	EC:3.5.1.98	Histone deacetylase	mobidb-lite (MOBIDB_LITE); mobidb-lite (MOBIDB_LITE)	no GO terms	no GO terms
TRINITY_DN10115_c0_g2_i1	cytomatrix protein-like protein	0	1	P:GO:0008150	P:biological_process			mobidb-lite (MOBIDB_LITE); mobidb-lite (MOBIDB_LITE); mobidb-lite (MOBIDB_LITE); PTHR35992 (PANTHER); PTHR35992:SF1 (PANTHER)	no GO terms	no GO terms
TRINITY_DN10115_c0_g2_i10	cytomatrix protein-like protein	0	1	P:GO:0008150	P:biological_process			PTHR35992:SF1 (PANTHER); PTHR35992 (PANTHER)	no GO terms	no GO terms
TRINITY_DN10115_c0_g2_i2	cytomatrix protein-like protein	0	1	P:GO:0008150	P:biological_process			mobidb-lite (MOBIDB_LITE); PTHR35992 (PANTHER); PTHR35992:SF1 (PANTHER)	no GO terms	no GO terms
TRINITY_DN10115_c0_g2_i3	cytomatrix protein-like protein	1.44034e-174	1	P:GO:0008150	P:biological_process			mobidb-lite (MOBIDB_LITE); PTHR35992 (PANTHER); PTHR35992:SF1 (PANTHER)	no GO terms	no GO terms
TRINITY_DN10115_c0_g2_i4	cytomatrix protein-like protein	0	1	P:GO:0008150	P:biological_process			PTHR35992 (PANTHER); PTHR35992:SF1 (PANTHER)	no GO terms	no GO terms
TRINITY_DN10115_c0_g2_i5	cytomatrix protein-like protein	0	1	P:GO:0008150	P:biological_process			mobidb-lite (MOBIDB_LITE); mobidb-lite (MOBIDB_LITE); mobidb-lite (MOBIDB_LITE); PTHR35992:SF1 (PANTHER); PTHR35992 (PANTHER)	no GO terms	no GO terms
TRINITY_DN10115_c0_g2_i6	cytomatrix protein-like protein	0	1	P:GO:0008150	P:biological_process			PTHR35992 (PANTHER); PTHR35992:SF1 (PANTHER)	no GO terms	no GO terms
TRINITY_DN10115_c0_g2_i7	cytomatrix protein-like protein	0	1	P:GO:0008150	P:biological_process			PTHR35992 (PANTHER); PTHR35992:SF1 (PANTHER)	no GO terms	no GO terms
TRINITY_DN10115_c0_g2_i8	cytomatrix protein-like protein	0	1	P:GO:0008150	P:biological_process			mobidb-lite (MOBIDB_LITE); mobidb-lite (MOBIDB_LITE); mobidb-lite (MOBIDB_LITE); mobidb-lite (MOBIDB_LITE); mobidb-lite (MOBIDB_LITE); PTHR35992:SF1 (PANTHER); PTHR35992 (PANTHER)	no GO terms	no GO terms
TRINITY_DN10115_c0_g2_i9	cytomatrix protein-like protein	0	1	P:GO:0008150	P:biological_process			PTHR35992 (PANTHER); PTHR35992:SF1 (PANTHER)	no GO terms	no GO terms
TRINITY_DN10115_c0_g3_i1	paired amphipathic helix protein Sin3-like 2 isoform X1	1.02684e-15	7	P:GO:0000122; P:GO:0016575; F:GO:0003714; F:GO:0004407; C:GO:0000118; C:GO:0000785; C:GO:0005829	P:negative regulation of transcription by RNA polymerase II; P:histone deacetylation; F:transcription corepressor activity; F:histone deacetylase activity; C:histone deacetylase complex; C:chromatin; C:cytosol	EC:3.5.1.98	Histone deacetylase	mobidb-lite (MOBIDB_LITE); mobidb-lite (MOBIDB_LITE)	no GO terms	no GO terms
TRINITY_DN10115_c0_g4_i1	paired amphipathic helix protein Sin3-like 2 isoform X1	1.2217e-06	10	P:GO:0000122; P:GO:0006355; P:GO:0016575; P:GO:1903507; F:GO:0003714; F:GO:0004407; C:GO:0000118; C:GO:0000785; C:GO:0005634; C:GO:0005829	P:negative regulation of transcription by RNA polymerase II; P:regulation of transcription, DNA-templated; P:histone deacetylation; P:negative regulation of nucleic acid-templated transcription; F:transcription corepressor activity; F:histone deacetylase activity; C:histone deacetylase complex; C:chromatin; C:nucleus; C:cytosol			no IPS match	no IPS match	no IPS match
TRINITY_DN10115_c0_g5_i1	Cytomatrix protein-related, putative	1.25874e-23						no IPS match	no IPS match	no IPS match
TRINITY_DN10115_c1_g1_i1	Protein kinase superfamily protein	0	6	P:GO:0006468; P:GO:0007166; F:GO:0004674; F:GO:0005524; C:GO:0005886; C:GO:0016021	P:protein phosphorylation; P:cell surface receptor signaling pathway; F:protein serine/threonine kinase activity; F:ATP binding; C:plasma membrane; C:integral component of membrane			G3DSA:3.30.200.20 (GENE3D); PIRSF000654 (PIRSF); IPR000719 (PFAM); G3DSA:1.10.510.10 (GENE3D); mobidb-lite (MOBIDB_LITE); mobidb-lite (MOBIDB_LITE); mobidb-lite (MOBIDB_LITE); PTHR27005 (PANTHER); PTHR27005:SF184 (PANTHER); IPR000719 (PROSITE_PROFILES); IPR011009 (SUPERFAMILY)	P:GO:0006468; F:GO:0004672; F:GO:0005524	P:protein phosphorylation; F:protein kinase activity; F:ATP binding
TRINITY_DN10115_c1_g1_i2	Protein kinase superfamily protein	0	6	P:GO:0006468; P:GO:0007166; F:GO:0004674; F:GO:0005524; C:GO:0005886; C:GO:0016021	P:protein phosphorylation; P:cell surface receptor signaling pathway; F:protein serine/threonine kinase activity; F:ATP binding; C:plasma membrane; C:integral component of membrane			G3DSA:1.10.510.10 (GENE3D); G3DSA:3.30.200.20 (GENE3D); IPR000719 (PFAM); G3DSA:2.10.25.10 (GENE3D); mobidb-lite (MOBIDB_LITE); mobidb-lite (MOBIDB_LITE); mobidb-lite (MOBIDB_LITE); PTHR27005:SF184 (PANTHER); PTHR27005 (PANTHER); IPR000719 (PROSITE_PROFILES); IPR011009 (SUPERFAMILY)	P:GO:0006468; F:GO:0004672; F:GO:0005524	P:protein phosphorylation; F:protein kinase activity; F:ATP binding
TRINITY_DN10116_c0_g1_i1	replication factor C subunit 3	7.00365e-36	6	P:GO:0006261; P:GO:0006281; F:GO:0003689; F:GO:0005524; C:GO:0005634; C:GO:0005663	P:DNA-dependent DNA replication; P:DNA repair; F:DNA clamp loader activity; F:ATP binding; C:nucleus; C:DNA replication factor C complex	EC:3.6.1.3; EC:3.6.1.15	Adenosinetriphosphatase; Nucleoside-triphosphate phosphatase	G3DSA:1.20.272.10 (GENE3D); PTHR11669 (PANTHER); PTHR11669:SF1 (PANTHER); IPR008921 (SUPERFAMILY)	P:GO:0006260; F:GO:0003677	P:DNA replication; F:DNA binding
TRINITY_DN10117_c0_g1_i1	protein NUCLEAR FUSION DEFECTIVE 6, chloroplastic/mitochondrial-like isoform X1	3.04302e-46	1	C:GO:0005739	C:mitochondrion			PTHR33156:SF40 (PANTHER); PTHR33156 (PANTHER)	no GO terms	no GO terms
TRINITY_DN10117_c0_g1_i11	protein NUCLEAR FUSION DEFECTIVE 6, chloroplastic/mitochondrial isoform X3	1.10523e-56	1	C:GO:0005739	C:mitochondrion			mobidb-lite (MOBIDB_LITE); PTHR33156 (PANTHER); PTHR33156:SF40 (PANTHER)	no GO terms	no GO terms
TRINITY_DN10117_c0_g1_i12	protein NUCLEAR FUSION DEFECTIVE 6, chloroplastic/mitochondrial-like isoform X2	1.99483e-54	2	P:GO:0000741; C:GO:0005739	P:karyogamy; C:mitochondrion			mobidb-lite (MOBIDB_LITE); PTHR33156:SF40 (PANTHER); PTHR33156 (PANTHER)	no GO terms	no GO terms
TRINITY_DN10117_c0_g1_i14	protein NUCLEAR FUSION DEFECTIVE 6, chloroplastic/mitochondrial isoform X3	1.74017e-56	1	C:GO:0005739	C:mitochondrion			mobidb-lite (MOBIDB_LITE); PTHR33156 (PANTHER); PTHR33156:SF40 (PANTHER)	no GO terms	no GO terms
TRINITY_DN10117_c0_g1_i16	protein NUCLEAR FUSION DEFECTIVE 6, chloroplastic/mitochondrial-like isoform X1	1.09013e-45	1	C:GO:0005739	C:mitochondrion			PTHR33156:SF40 (PANTHER); PTHR33156 (PANTHER)	no GO terms	no GO terms
TRINITY_DN10117_c0_g1_i17	protein NUCLEAR FUSION DEFECTIVE 6, chloroplastic/mitochondrial isoform X3	7.07094e-41	2	P:GO:0000741; C:GO:0005739	P:karyogamy; C:mitochondrion			PTHR33156 (PANTHER); PTHR33156:SF40 (PANTHER)	no GO terms	no GO terms
TRINITY_DN10117_c0_g1_i2	protein NUCLEAR FUSION DEFECTIVE 6, chloroplastic/mitochondrial isoform X3	4.71419e-41	2	P:GO:0000741; C:GO:0005739	P:karyogamy; C:mitochondrion			PTHR33156 (PANTHER); PTHR33156:SF40 (PANTHER)	no GO terms	no GO terms
TRINITY_DN10117_c0_g1_i3	protein NUCLEAR FUSION DEFECTIVE 6, chloroplastic/mitochondrial-like isoform X1	4.77322e-55	1	C:GO:0005739	C:mitochondrion			mobidb-lite (MOBIDB_LITE); PTHR33156:SF40 (PANTHER); PTHR33156 (PANTHER)	no GO terms	no GO terms
TRINITY_DN10117_c0_g1_i4	protein NUCLEAR FUSION DEFECTIVE 6, chloroplastic/mitochondrial-like isoform X2	7.17513e-46	2	P:GO:0000741; C:GO:0005739	P:karyogamy; C:mitochondrion			PTHR33156 (PANTHER); PTHR33156:SF40 (PANTHER)	no GO terms	no GO terms
TRINITY_DN10117_c0_g1_i6	protein NUCLEAR FUSION DEFECTIVE 6, chloroplastic/mitochondrial-like isoform X1	2.86673e-55	1	C:GO:0005739	C:mitochondrion			mobidb-lite (MOBIDB_LITE); PTHR33156:SF40 (PANTHER); PTHR33156 (PANTHER)	no GO terms	no GO terms
TRINITY_DN10117_c0_g1_i7	protein NUCLEAR FUSION DEFECTIVE 6, chloroplastic/mitochondrial-like isoform X1	1.02478e-77	1	C:GO:0005739	C:mitochondrion			mobidb-lite (MOBIDB_LITE); PTHR33156:SF40 (PANTHER); PTHR33156 (PANTHER)	no GO terms	no GO terms
TRINITY_DN10117_c0_g1_i9	protein NUCLEAR FUSION DEFECTIVE 6, chloroplastic/mitochondrial-like isoform X1	6.57739e-42	1	C:GO:0005739	C:mitochondrion			PTHR33156 (PANTHER); PTHR33156:SF40 (PANTHER)	no GO terms	no GO terms
TRINITY_DN10118_c0_g1_i1	Arginine decarboxylase	5.57731e-167	14	P:GO:0006527; P:GO:0006979; P:GO:0008295; P:GO:0009409; P:GO:0009611; P:GO:0009651; P:GO:0009737; P:GO:0009753; P:GO:0033388; P:GO:0080167; F:GO:0008792; F:GO:0042803; C:GO:0005829; C:GO:0009507	P:arginine catabolic process; P:response to oxidative stress; P:spermidine biosynthetic process; P:response to cold; P:response to wounding; P:response to salt stress; P:response to abscisic acid; P:response to jasmonic acid; P:putrescine biosynthetic process from arginine; P:response to karrikin; F:arginine decarboxylase activity; F:protein homodimerization activity; C:cytosol; C:chloroplast	EC:4.1.1.19	Arginine decarboxylase	IPR000183 (PRINTS); IPR002985 (PRINTS); IPR029066 (G3DSA:3.20.20.GENE3D); IPR022644 (PFAM); PTHR43295:SF3 (PANTHER); IPR002985 (PANTHER); IPR029066 (SUPERFAMILY)	P:GO:0006527; P:GO:0008295; F:GO:0003824; F:GO:0008792	P:arginine catabolic process; P:spermidine biosynthetic process; F:catalytic activity; F:arginine decarboxylase activity
TRINITY_DN10118_c0_g1_i2	Arginine decarboxylase	4.5685e-164	14	P:GO:0006527; P:GO:0006979; P:GO:0008295; P:GO:0009409; P:GO:0009611; P:GO:0009651; P:GO:0009737; P:GO:0009753; P:GO:0033388; P:GO:0080167; F:GO:0008792; F:GO:0042803; C:GO:0005829; C:GO:0009507	P:arginine catabolic process; P:response to oxidative stress; P:spermidine biosynthetic process; P:response to cold; P:response to wounding; P:response to salt stress; P:response to abscisic acid; P:response to jasmonic acid; P:putrescine biosynthetic process from arginine; P:response to karrikin; F:arginine decarboxylase activity; F:protein homodimerization activity; C:cytosol; C:chloroplast	EC:4.1.1.19	Arginine decarboxylase	IPR002985 (PRINTS); IPR000183 (PRINTS); IPR022644 (PFAM); IPR029066 (G3DSA:3.20.20.GENE3D); IPR002985 (PANTHER); PTHR43295:SF3 (PANTHER); IPR029066 (SUPERFAMILY)	P:GO:0006527; P:GO:0008295; F:GO:0003824; F:GO:0008792	P:arginine catabolic process; P:spermidine biosynthetic process; F:catalytic activity; F:arginine decarboxylase activity
TRINITY_DN10119_c0_g1_i1	O-fucosyltransferase family protein	0	5	P:GO:0006004; F:GO:0016757; C:GO:0005768; C:GO:0005802; C:GO:0016021	P:fucose metabolic process; F:transferase activity, transferring glycosyl groups; C:endosome; C:trans-Golgi network; C:integral component of membrane			IPR024709 (PIRSF); IPR019378 (PFAM); PTHR31933:SF9 (PANTHER); PTHR31933 (PANTHER); IPR024709 (CDD)	no GO terms	no GO terms
TRINITY_DN10119_c0_g1_i2	O-fucosyltransferase family protein	0	5	P:GO:0006004; F:GO:0016757; C:GO:0005768; C:GO:0005802; C:GO:0016021	P:fucose metabolic process; F:transferase activity, transferring glycosyl groups; C:endosome; C:trans-Golgi network; C:integral component of membrane			IPR024709 (PIRSF); IPR019378 (PFAM); mobidb-lite (MOBIDB_LITE); PTHR31933:SF9 (PANTHER); PTHR31933 (PANTHER); IPR024709 (CDD)	no GO terms	no GO terms
TRINITY_DN10119_c0_g1_i3	O-fucosyltransferase family protein	0	5	P:GO:0006004; F:GO:0016757; C:GO:0005768; C:GO:0005802; C:GO:0016021	P:fucose metabolic process; F:transferase activity, transferring glycosyl groups; C:endosome; C:trans-Golgi network; C:integral component of membrane			IPR024709 (PIRSF); IPR019378 (PFAM); mobidb-lite (MOBIDB_LITE); PTHR31933:SF9 (PANTHER); PTHR31933 (PANTHER)	no GO terms	no GO terms
TRINITY_DN10119_c0_g1_i4	O-fucosyltransferase family protein	0	5	P:GO:0006004; F:GO:0016757; C:GO:0005768; C:GO:0005802; C:GO:0016021	P:fucose metabolic process; F:transferase activity, transferring glycosyl groups; C:endosome; C:trans-Golgi network; C:integral component of membrane			IPR019378 (PFAM); PTHR31933:SF9 (PANTHER); PTHR31933 (PANTHER)	no GO terms	no GO terms
TRINITY_DN10119_c0_g1_i5	O-fucosyltransferase family protein	0	5	P:GO:0006004; F:GO:0016757; C:GO:0005768; C:GO:0005802; C:GO:0016021	P:fucose metabolic process; F:transferase activity, transferring glycosyl groups; C:endosome; C:trans-Golgi network; C:integral component of membrane			IPR019378 (PFAM); IPR024709 (PIRSF); mobidb-lite (MOBIDB_LITE); PTHR31933 (PANTHER); PTHR31933:SF9 (PANTHER); IPR024709 (CDD)	no GO terms	no GO terms
TRINITY_DN10119_c0_g1_i6	O-fucosyltransferase family protein	0	5	P:GO:0006004; F:GO:0016757; C:GO:0005768; C:GO:0005802; C:GO:0016021	P:fucose metabolic process; F:transferase activity, transferring glycosyl groups; C:endosome; C:trans-Golgi network; C:integral component of membrane			IPR019378 (PFAM); PTHR31933 (PANTHER); PTHR31933:SF9 (PANTHER)	no GO terms	no GO terms
TRINITY_DN10119_c0_g2_i1	---NA---							no IPS match	no IPS match	no IPS match
TRINITY_DN10119_c1_g1_i1	Translation initiation factor SUI1 family protein	8.87918e-77	6	P:GO:0001731; P:GO:0002188; F:GO:0003729; F:GO:0003743; C:GO:0005737; C:GO:0005840	P:formation of translation preinitiation complex; P:translation reinitiation; F:mRNA binding; F:translation initiation factor activity; C:cytoplasm; C:ribosome			mobidb-lite (MOBIDB_LITE)	no GO terms	no GO terms
TRINITY_DN10119_c1_g1_i10	translation machinery-associated protein 22 isoform X2	0.000117331	7	P:GO:0001731; P:GO:0002188; P:GO:0006413; F:GO:0003729; F:GO:0003743; C:GO:0005737; C:GO:0005840	P:formation of translation preinitiation complex; P:translation reinitiation; P:translational initiation; F:mRNA binding; F:translation initiation factor activity; C:cytoplasm; C:ribosome			no IPS match	no IPS match	no IPS match
TRINITY_DN10119_c1_g1_i11	CWF19-like protein 2	3.59569e-08						no IPS match	no IPS match	no IPS match
TRINITY_DN10119_c1_g1_i2	---NA---							no IPS match	no IPS match	no IPS match
TRINITY_DN10119_c1_g1_i3	Translation initiation factor SUI1 family protein	1.77531e-35	6	P:GO:0001731; P:GO:0002188; F:GO:0003729; F:GO:0003743; C:GO:0005737; C:GO:0005840	P:formation of translation preinitiation complex; P:translation reinitiation; F:mRNA binding; F:translation initiation factor activity; C:cytoplasm; C:ribosome			no IPS match	no IPS match	no IPS match
TRINITY_DN10119_c1_g1_i4	CWF19-like protein 2	0.00062186						mobidb-lite (MOBIDB_LITE)	no GO terms	no GO terms
TRINITY_DN10119_c1_g1_i6	Translation initiation factor SUI1 family protein	2.27624e-104	6	P:GO:0001731; P:GO:0002188; F:GO:0003729; F:GO:0003743; C:GO:0005737; C:GO:0005840	P:formation of translation preinitiation complex; P:translation reinitiation; F:mRNA binding; F:translation initiation factor activity; C:cytoplasm; C:ribosome			G3DSA:3.30.780.10 (GENE3D); IPR001950 (PFAM); IPR005873 (TIGRFAM); PTHR12789:SF2 (PANTHER); PTHR12789 (PANTHER); IPR001950 (PROSITE_PROFILES); cd11607 (CDD); IPR036877 (SUPERFAMILY)	P:GO:0006413; F:GO:0003743	P:translational initiation; F:translation initiation factor activity
TRINITY_DN10119_c1_g1_i7	---NA---							no IPS match	no IPS match	no IPS match
TRINITY_DN10119_c1_g1_i8	Translation initiation factor SUI1 family protein	2.86711e-95	6	P:GO:0001731; P:GO:0002188; F:GO:0003729; F:GO:0003743; C:GO:0005737; C:GO:0005840	P:formation of translation preinitiation complex; P:translation reinitiation; F:mRNA binding; F:translation initiation factor activity; C:cytoplasm; C:ribosome			IPR005873 (TIGRFAM); IPR001950 (PFAM); G3DSA:3.30.780.10 (GENE3D); PTHR12789:SF2 (PANTHER); PTHR12789 (PANTHER); IPR001950 (PROSITE_PROFILES); cd11607 (CDD); IPR036877 (SUPERFAMILY)	P:GO:0006413; F:GO:0003743	P:translational initiation; F:translation initiation factor activity
TRINITY_DN10119_c1_g1_i9	---NA---							no IPS match	no IPS match	no IPS match
TRINITY_DN1012_c0_g1_i1	calmodulin-binding receptor-like cytoplasmic kinase 1	0	12	P:GO:0009409; P:GO:0009555; P:GO:0009651; P:GO:0009737; P:GO:0042542; P:GO:0046777; F:GO:0004683; F:GO:0005516; F:GO:0005524; C:GO:0005737; C:GO:0005886; C:GO:0009506	P:response to cold; P:pollen development; P:response to salt stress; P:response to abscisic acid; P:response to hydrogen peroxide; P:protein autophosphorylation; F:calmodulin-dependent protein kinase activity; F:calmodulin binding; F:ATP binding; C:cytoplasm; C:plasma membrane; C:plasmodesma	EC:2.7.11.17	Calcium/calmodulin-dependent protein kinase	G3DSA:3.30.200.20 (GENE3D); PIRSF000615 (PIRSF); IPR001245 (PFAM); G3DSA:1.10.510.10 (GENE3D); mobidb-lite (MOBIDB_LITE); PTHR27003 (PANTHER); PTHR27003:SF43 (PANTHER); IPR000719 (PROSITE_PROFILES); cd14066 (CDD); IPR011009 (SUPERFAMILY)	P:GO:0006468; F:GO:0004672; F:GO:0005524	P:protein phosphorylation; F:protein kinase activity; F:ATP binding
TRINITY_DN1012_c0_g1_i2	calmodulin-binding receptor-like cytoplasmic kinase 1	0	12	P:GO:0009409; P:GO:0009555; P:GO:0009651; P:GO:0009737; P:GO:0042542; P:GO:0046777; F:GO:0004683; F:GO:0005516; F:GO:0005524; C:GO:0005737; C:GO:0005886; C:GO:0009506	P:response to cold; P:pollen development; P:response to salt stress; P:response to abscisic acid; P:response to hydrogen peroxide; P:protein autophosphorylation; F:calmodulin-dependent protein kinase activity; F:calmodulin binding; F:ATP binding; C:cytoplasm; C:plasma membrane; C:plasmodesma	EC:2.7.11.17	Calcium/calmodulin-dependent protein kinase	G3DSA:1.10.510.10 (GENE3D); G3DSA:3.30.200.20 (GENE3D); PIRSF000615 (PIRSF); IPR001245 (PFAM); mobidb-lite (MOBIDB_LITE); mobidb-lite (MOBIDB_LITE); PTHR27003 (PANTHER); PTHR27003:SF43 (PANTHER); IPR000719 (PROSITE_PROFILES); cd14066 (CDD); IPR011009 (SUPERFAMILY)	P:GO:0006468; F:GO:0004672; F:GO:0005524	P:protein phosphorylation; F:protein kinase activity; F:ATP binding
TRINITY_DN1012_c0_g1_i3	calmodulin-binding receptor-like cytoplasmic kinase 1	0	12	P:GO:0009409; P:GO:0009555; P:GO:0009651; P:GO:0009737; P:GO:0042542; P:GO:0046777; F:GO:0004683; F:GO:0005516; F:GO:0005524; C:GO:0005737; C:GO:0005886; C:GO:0009506	P:response to cold; P:pollen development; P:response to salt stress; P:response to abscisic acid; P:response to hydrogen peroxide; P:protein autophosphorylation; F:calmodulin-dependent protein kinase activity; F:calmodulin binding; F:ATP binding; C:cytoplasm; C:plasma membrane; C:plasmodesma	EC:2.7.11.17	Calcium/calmodulin-dependent protein kinase	IPR001245 (PFAM); PIRSF000615 (PIRSF); G3DSA:3.30.200.20 (GENE3D); G3DSA:1.10.510.10 (GENE3D); PTHR27003:SF43 (PANTHER); PTHR27003 (PANTHER); IPR000719 (PROSITE_PROFILES); cd14066 (CDD); IPR011009 (SUPERFAMILY)	P:GO:0006468; F:GO:0004672; F:GO:0005524	P:protein phosphorylation; F:protein kinase activity; F:ATP binding
TRINITY_DN1012_c0_g1_i4	calmodulin-binding receptor-like cytoplasmic kinase 1	0	12	P:GO:0009409; P:GO:0009555; P:GO:0009651; P:GO:0009737; P:GO:0042542; P:GO:0046777; F:GO:0004683; F:GO:0005516; F:GO:0005524; C:GO:0005737; C:GO:0005886; C:GO:0009506	P:response to cold; P:pollen development; P:response to salt stress; P:response to abscisic acid; P:response to hydrogen peroxide; P:protein autophosphorylation; F:calmodulin-dependent protein kinase activity; F:calmodulin binding; F:ATP binding; C:cytoplasm; C:plasma membrane; C:plasmodesma	EC:2.7.11.17	Calcium/calmodulin-dependent protein kinase	G3DSA:3.30.200.20 (GENE3D); IPR001245 (PFAM); PIRSF000615 (PIRSF); G3DSA:1.10.510.10 (GENE3D); mobidb-lite (MOBIDB_LITE); PTHR27003 (PANTHER); PTHR27003:SF43 (PANTHER); IPR000719 (PROSITE_PROFILES); cd14066 (CDD); IPR011009 (SUPERFAMILY)	P:GO:0006468; F:GO:0004672; F:GO:0005524	P:protein phosphorylation; F:protein kinase activity; F:ATP binding
TRINITY_DN1012_c0_g1_i5	calmodulin-binding receptor-like cytoplasmic kinase 1	0	12	P:GO:0009409; P:GO:0009555; P:GO:0009651; P:GO:0009737; P:GO:0042542; P:GO:0046777; F:GO:0004683; F:GO:0005516; F:GO:0005524; C:GO:0005737; C:GO:0005886; C:GO:0009506	P:response to cold; P:pollen development; P:response to salt stress; P:response to abscisic acid; P:response to hydrogen peroxide; P:protein autophosphorylation; F:calmodulin-dependent protein kinase activity; F:calmodulin binding; F:ATP binding; C:cytoplasm; C:plasma membrane; C:plasmodesma	EC:2.7.11.17	Calcium/calmodulin-dependent protein kinase	G3DSA:1.10.510.10 (GENE3D); IPR001245 (PFAM); PIRSF000615 (PIRSF); G3DSA:3.30.200.20 (GENE3D); PTHR27003:SF43 (PANTHER); PTHR27003 (PANTHER); IPR000719 (PROSITE_PROFILES); cd14066 (CDD); IPR011009 (SUPERFAMILY)	P:GO:0006468; F:GO:0004672; F:GO:0005524	P:protein phosphorylation; F:protein kinase activity; F:ATP binding
TRINITY_DN1012_c0_g1_i6	calmodulin-binding receptor-like cytoplasmic kinase 1	0	12	P:GO:0009409; P:GO:0009555; P:GO:0009651; P:GO:0009737; P:GO:0042542; P:GO:0046777; F:GO:0004683; F:GO:0005516; F:GO:0005524; C:GO:0005737; C:GO:0005886; C:GO:0009506	P:response to cold; P:pollen development; P:response to salt stress; P:response to abscisic acid; P:response to hydrogen peroxide; P:protein autophosphorylation; F:calmodulin-dependent protein kinase activity; F:calmodulin binding; F:ATP binding; C:cytoplasm; C:plasma membrane; C:plasmodesma	EC:2.7.11.17	Calcium/calmodulin-dependent protein kinase	G3DSA:1.10.510.10 (GENE3D); G3DSA:3.30.200.20 (GENE3D); PIRSF000615 (PIRSF); IPR001245 (PFAM); mobidb-lite (MOBIDB_LITE); mobidb-lite (MOBIDB_LITE); PTHR27003 (PANTHER); PTHR27003:SF43 (PANTHER); IPR000719 (PROSITE_PROFILES); cd14066 (CDD); IPR011009 (SUPERFAMILY)	P:GO:0006468; F:GO:0004672; F:GO:0005524	P:protein phosphorylation; F:protein kinase activity; F:ATP binding
[truncated: 163,924 more rows]

## Sheet: Supplementary Table 7
Supplementary Table 7 : Information on differentially expressed genes (DEGs) during durian ripening.
[truncated: 23 more rows]

[truncated: 1 more sheets: Supplementary Table 8]
